# Supplementary material
Source: publisher figshare collection journal article supplement (https://acs.figshare.com/ndownloader/files/34310358)
Supplement: Supplementary file 1 [file 34310358]

## Sheet: Cover Page
Semen Proteomics of COVID-19 convalescent men reveals disruption of key biological pathways relevant to male reproductive function
Susmita Ghosh1#$, Swapneil Parikh2#, Mehar Un Nissa1#, Arup Acharjee1, Avinash Singh1, Dhruv Patwa4, Prashant Makwana3, Arundhati Athalye3, Abhilash Barpanda1, Malini Laloraya5, Sanjeeva Srivastava1, Firuza Parikh3*
1Proteomics Lab, Department of Biosciences and Bioengineering, Indian Institute of Technology Bombay, Powai, Mumbai 400076, Maharashtra India.
2Molecular Laboratory, Kasturba Hospital for Infectious Diseases, Mumbai, India
3Jaslok-FertilTree International Centre, Department of Assisted Reproduction and Genetics, 8th Floor, Jaslok Hospital and Research Centre Dr. G, Pedder Rd, Mumbai-400026 Maharashtra, India.
4Department of Chemical Engineering, Indian Institute of Technology Bombay, Powai, Mumbai 400076, Maharashtra India.
5Division of Molecular Reproduction, Rajiv Gandhi Centre for Biotechnology, Thycaud PO, Poojappura, Thiruvananthapuram -695014, Kerala, India.
#Contributed equally
$Current address: Leibniz-Institut für Analytische Wissenschaften – ISAS – e.V., Otto-Hahn-Str. 6b 44227 Dortmund
* Correspondence: Dr. Firuza Parikh, Email: frparikh@gmail.com

## Sheet: Worksheet
Worksheet	Content
Protein	Total Number of Proteins identified
MV imputed Proteins	No. of Missing Value imputed proteins
Normalised_abundances	Sample wise abundances after normalisation
Peptide	Total number of peptides identified
Abundant in Control	Abundant proteins in Control (Present in more than 70% of control group and less than 30% in COVID-19 R)
Abundant in COVID-19 R	Abundant proteins in COVID-19 Recovered (Present in more than 70% of COVID-19 R and less than 30% in control )

## Sheet: Protein
	C12	C13	C15	C10	C11	C7	C8	C9	C5	C6	SCT006	SCT0010	SCT009	SCT002	SCT003	SCT001	SCT004	SCT0011	SCT0012	SCT0013	SCT0014	SCT0015	SCT0016	SCT005	SCT0018	SCT0019	SCT0020
Protein IDs	Control	Control	Control	Control	Control	Control	Control	Control	Control	Control	COVID	COVID	COVID	COVID	COVID	COVID	COVID	COVID	COVID	COVID	COVID	COVID	COVID	COVID	COVID	COVID	COVID
sp|P13693|TCTP_HUMAN;sp|Q56UQ5|TPT1L_HUMAN	0	0	0	0	0	0	0	0	0	0	0	0	0	0	0	0	0	0	0	0	0	0	0	0	0	0	0
sp|P49006|MRP_HUMAN	0	0	0	0	0	0	0	0	0	0	0	0	0	4368900	0	0	0	0	0	0	0	0	0	0	0	0	0
sp|P19827|ITIH1_HUMAN	0	0	18676000	0	0	0	0	0	0	0	0	0	0	0	0	0	0	0	0	0	0	0	0	0	0	0	0
sp|P18827|SDC1_HUMAN	0	0	0	0	0	0	0	0	0	0	0	0	0	0	8268100	0	0	0	0	0	0	0	0	12475000	0	0	0
sp|Q8NEX6|WFD11_HUMAN	0	0	0	0	0	0	9327400	0	0	0	0	0	0	0	0	0	0	0	0	0	0	0	0	0	0	6169100	0
sp|Q96BM9|ARL8A_HUMAN;sp|Q9NVJ2|ARL8B_HUMAN	0	0	0	0	19353000	0	0	0	0	0	0	0	0	0	0	0	0	0	0	0	0	0	0	0	0	46867000	0
sp|Q7L4I2|RSRC2_HUMAN	0	0	0	0	0	1274300000	0	0	0	0	0	0	0	0	0	0	0	0	0	0	0	0	0	1153700000	0	0	0
sp|P13688|CEAM1_HUMAN;sp|P06731|CEAM5_HUMAN	0	0	0	0	0	0	0	0	12588000	0	0	0	0	0	0	0	0	0	0	0	0	0	0	0	0	0	4855000
sp|P04839|CY24B_HUMAN	0	0	0	0	0	0	21592000	0	0	0	0	0	0	0	0	0	0	0	0	0	0	0	0	0	16472000	0	0
sp|P50914|RL14_HUMAN	0	0	0	0	0	0	0	0	0	0	0	0	0	2430900	0	0	6050500	0	0	0	0	0	0	0	0	0	0
sp|P30050|RL12_HUMAN	0	0	0	0	0	0	0	0	0	0	0	0	0	3793000	0	0	8033500	0	0	0	0	0	0	0	0	0	0
sp|P48426|PI42A_HUMAN	0	0	0	0	0	0	0	0	0	0	0	0	0	152020000	0	75918000	0	0	0	0	0	0	0	0	0	0	0
sp|P28676|GRAN_HUMAN	0	0	0	0	0	0	3207600	0	0	0	0	0	0	0	0	0	0	0	0	0	0	0	0	0	4913100	0	0
sp|P50148|GNAQ_HUMAN;sp|P29992|GNA11_HUMAN	0	0	0	0	0	0	0	0	0	0	0	0	0	0	0	0	0	0	0	0	0	2473100	4541900	0	0	0	0
sp|Q5FVE4|ACBG2_HUMAN	0	0	0	0	0	0	21657000	5496400	0	0	0	0	0	0	0	0	0	0	0	0	0	0	0	0	0	0	0
sp|Q9H3Z4|DNJC5_HUMAN	0	0	0	0	0	0	0	11723000	0	0	0	0	0	0	0	0	0	0	0	0	0	0	0	0	0	6846300	0
sp|Q01780|EXOSX_HUMAN	0	0	0	0	0	0	0	0	0	0	0	0	0	0	0	48569000	0	0	0	0	0	0	0	14709000	0	0	0
sp|Q86TJ5|ZN554_HUMAN	0	0	0	0	0	0	0	0	0	0	0	0	0	0	1635800	0	5380800	0	0	0	0	0	0	0	0	0	0
sp|O60309|L37A3_HUMAN	0	0	0	6876400	0	0	0	0	0	0	0	0	0	0	0	0	0	0	0	0	0	0	0	0	0	5533800	0
sp|Q86VQ3|TXND2_HUMAN	0	0	0	0	0	0	3133400	0	0	0	0	0	0	0	0	0	2742100	0	0	0	0	0	0	0	0	0	0
sp|Q8NDC0|MISSL_HUMAN	0	0	0	0	0	0	0	0	0	0	0	0	0	0	4912900	0	0	0	0	0	0	0	0	5280400	0	0	0
sp|Q14332|FZD2_HUMAN	0	0	0	5586200	0	0	0	0	0	0	2019700	0	0	0	0	0	0	0	0	0	0	0	0	0	0	0	0
sp|Q5CZC0|FSIP2_HUMAN	0	0	0	0	161780000	0	0	0	0	0	0	0	0	0	0	0	0	0	0	0	0	0	1017100	0	0	0	0
sp|P36542|ATPG_HUMAN	0	0	0	0	0	0	0	0	0	0	0	0	0	8398400	0	0	5434700	0	0	0	0	0	0	0	0	0	0
sp|Q92598|HS105_HUMAN	0	0	0	0	9031300	0	0	4035600	0	0	0	0	0	0	0	0	0	0	0	0	0	0	0	0	0	0	0
sp|P0DPI2|GAL3A_HUMAN;sp|A0A0B4J2D5|GAL3B_HUMAN	0	0	0	0	0	0	0	0	0	0	0	0	0	0	0	0	4375900	0	0	0	0	0	0	0	0	28062000	0
sp|O43708|MAAI_HUMAN	0	0	0	0	0	0	0	0	0	0	0	0	0	16030000	0	0	12420000	0	0	0	0	0	0	0	0	0	0
sp|P18124|RL7_HUMAN	0	0	0	0	0	0	0	0	0	0	0	0	0	0	0	2404400	1533600	0	0	0	0	0	0	0	0	0	0
sp|Q07021|C1QBP_HUMAN	0	0	0	0	0	0	0	0	0	0	1588100	0	0	0	0	0	3349500	0	0	0	0	0	0	0	0	0	0
sp|P32320|CDD_HUMAN	0	0	0	0	0	0	9320700	0	0	0	0	0	0	0	0	0	0	0	0	0	0	0	0	0	22911000	0	0
sp|P27824|CALX_HUMAN	0	0	0	2614700	0	0	0	11185000	0	0	0	0	0	0	0	0	0	0	0	0	0	0	0	0	0	0	0
sp|P55209|NP1L1_HUMAN	0	0	0	0	0	0	0	0	0	0	1837100	0	0	0	0	0	14652000	0	0	0	0	0	0	0	0	0	0
sp|P16083|NQO2_HUMAN	0	0	0	0	0	4714800	0	0	0	0	0	0	0	0	0	0	0	0	0	0	0	0	0	40906000	0	0	0
sp|P41218|MNDA_HUMAN	0	0	0	0	0	0	31053000	0	0	0	0	0	0	0	0	0	0	0	0	0	0	0	0	0	72746000	0	0
sp|P00748|FA12_HUMAN	0	0	5191800	0	0	0	0	0	0	0	0	0	0	0	0	0	0	0	0	0	0	4020400	0	0	0	0	0
sp|Q9ULZ3|ASC_HUMAN	0	0	0	0	0	0	843140	0	0	0	0	0	0	0	0	0	0	0	0	0	0	0	0	0	10828000	0	0
sp|Q9UHG2|PCS1N_HUMAN	0	0	0	0	0	0	8461400	0	0	0	0	19761000	0	0	0	0	0	0	0	0	0	0	0	0	0	0	0
sp|P23280|CAH6_HUMAN	0	0	0	0	0	0	0	0	0	0	0	0	0	0	0	0	0	0	0	2254800	0	0	0	6213800	0	0	0
sp|O00159|MYO1C_HUMAN	0	0	0	0	0	0	0	0	0	0	0	0	0	0	0	1004300	342260	0	0	0	0	0	0	0	0	0	0
sp|P06681|CO2_HUMAN	0	0	0	0	0	3413500	2297700	0	0	0	0	0	0	0	0	0	0	0	0	0	0	0	0	0	0	0	0
sp|Q93091|RNAS6_HUMAN	0	0	0	0	0	0	0	0	0	0	13125000	10627000	0	0	0	0	0	0	0	0	0	0	0	0	0	0	0
sp|P11215|ITAM_HUMAN	0	0	0	0	0	0	19710000	0	0	0	0	0	0	0	0	0	0	0	0	0	0	0	0	0	25051000	0	0
sp|Q15063|POSTN_HUMAN;CON__Q2KJC7	0	0	11173000	0	0	0	0	0	0	0	0	0	0	0	0	14693000	0	0	0	0	0	0	0	0	0	0	0
sp|O75594|PGRP1_HUMAN	0	0	0	0	0	0	61988000	0	0	0	0	0	0	0	0	0	0	0	0	0	0	0	0	0	19781000	0	0
sp|P07910|HNRPC_HUMAN;sp|P0DMR1|HNRC4_HUMAN;sp|O60812|HNRC1_HUMAN;sp|B7ZW38|HNRC3_HUMAN;sp|B2RXH8|HNRC2_HUMAN	0	0	0	0	0	0	0	28980000	0	0	0	0	0	0	0	0	0	0	0	0	0	0	0	0	7656800	0	0
sp|P02042|HBD_HUMAN;CON__P02070;sp|P69891|HBG1_HUMAN;sp|P02100|HBE_HUMAN;CON__Q3SX09	0	0	121160000	0	0	0	0	0	0	0	0	0	17189000	0	0	0	0	0	0	0	0	0	0	0	0	0	0
sp|Q14624|ITIH4_HUMAN	0	0	57105000	0	0	0	0	0	0	0	0	0	0	0	0	0	0	56747000	0	0	0	0	0	0	0	0	0
sp|P31146|COR1A_HUMAN	0	0	0	0	0	0	78308000	0	0	0	0	0	0	0	0	0	0	0	0	0	0	0	0	0	73941000	0	0
sp|P51884|LUM_HUMAN;CON__Q05443	0	0	2203800	0	0	0	0	0	0	0	0	0	0	0	0	0	0	0	784670	0	0	0	0	0	0	0	0
sp|P04843|RPN1_HUMAN	0	0	0	0	0	0	0	0	0	0	0	0	0	0	1439900	0	26212000	0	0	0	0	0	0	0	0	0	0
sp|P25325|THTM_HUMAN	0	0	0	0	0	0	0	0	0	0	0	0	0	0	0	0	0	4893500	0	0	4140500	0	0	0	0	0	0
sp|O75348|VATG1_HUMAN;sp|O95670|VATG2_HUMAN	0	0	0	0	0	0	0	0	12566000	0	0	0	0	0	0	0	0	0	0	0	0	0	0	0	0	4879200	0
sp|Q7Z7H5|TMED4_HUMAN	0	0	0	0	0	0	0	0	0	0	0	0	0	10070000	0	0	27961000	0	0	0	0	0	0	0	0	0	0
sp|O95473|SNG4_HUMAN	0	0	0	0	0	0	0	0	0	0	0	0	0	0	0	1913000	9931200	0	0	0	0	0	0	0	0	0	0
sp|O60664|PLIN3_HUMAN	0	0	0	0	0	0	0	0	0	0	0	0	0	0	26878000	0	0	0	0	0	0	0	0	36219000	0	0	0
sp|Q13232|NDK3_HUMAN	5400500	6724200	0	0	0	0	0	0	0	0	0	0	0	0	0	0	0	0	0	0	0	0	0	0	0	0	0
sp|Q5T4F7|SFRP5_HUMAN	0	0	0	0	0	0	0	0	0	0	0	0	0	0	11956000	13887000	0	0	0	0	0	0	0	0	0	0	0
sp|O00204|ST2B1_HUMAN	0	0	0	0	0	0	0	0	5437000	10881000	0	0	0	0	0	0	0	0	0	0	0	0	0	0	0	0	0
sp|Q75WM6|H1FNT_HUMAN	0	0	0	0	0	0	25400000	6636500	0	0	0	0	0	0	0	0	0	0	0	0	0	0	0	0	0	6625200	0
sp|P17342|ANPRC_HUMAN	0	0	2929600	0	0	0	0	0	0	0	0	0	0	0	0	0	0	3247800	0	0	0	4565000	0	0	0	0	0
sp|Q8N128|F177A_HUMAN	0	0	0	8491300	0	0	0	0	0	0	4083600	0	0	0	0	0	0	0	0	0	0	0	0	0	3323200	0	0
sp|Q9HCE9|ANO8_HUMAN	0	0	0	0	0	0	0	0	2223200	0	0	0	0	0	33033000	0	6567900	0	0	0	0	0	0	0	0	0	0
sp|Q96HD1|CREL1_HUMAN	0	0	0	0	0	0	0	0	0	0	0	0	0	4028400	292490000	824420	0	0	0	0	0	0	0	0	0	0	0
sp|Q86WS5|TMPSC_HUMAN	0	0	0	0	2568400	0	6005300	2402200	0	0	0	0	0	0	0	0	0	0	0	0	0	0	0	0	0	0	0
sp|P57105|SYJ2B_HUMAN	0	0	0	0	0	0	11865000	7222200	0	0	0	0	0	0	0	0	0	0	0	0	0	0	0	0	0	12771000	0
sp|P14410|SUIS_HUMAN	0	0	0	8785200	0	0	0	0	0	0	0	0	0	0	0	0	7314800	0	0	0	0	0	0	8996800	0	0	0
sp|O76076|CCN5_HUMAN	0	0	3503800	0	0	0	0	0	0	0	0	0	0	0	7631000	0	0	0	0	0	0	0	0	8352000	0	0	0
sp|P01700|LV147_HUMAN;sp|P01699|LV144_HUMAN	0	0	0	0	0	0	10098000	0	0	0	0	0	0	0	0	0	0	0	0	0	0	0	0	0	11305000	12203000	0
sp|P05452|TETN_HUMAN;CON__Q2KIS7	0	0	11764000	0	0	0	0	0	0	0	0	0	0	0	0	925820	0	1818200	0	0	0	0	0	0	0	0	0
sp|P22732|GTR5_HUMAN	0	0	0	0	0	0	0	0	0	0	0	0	0	0	0	0	0	0	0	0	8055300	7521200	21333000	0	0	0	0
sp|Q8NFT2|STEA2_HUMAN	0	0	0	0	0	0	0	0	8563700	0	0	0	0	13526000	0	0	0	0	0	0	0	0	0	0	0	0	7645100
sp|Q9NZM1|MYOF_HUMAN	0	0	0	18723000	0	0	1270900	0	0	0	2054200	0	0	0	0	0	0	0	0	0	0	0	0	0	0	0	0
sp|Q9H8J5|MANS1_HUMAN	0	0	0	0	0	0	0	0	7455800	3235500	0	0	0	0	0	0	0	0	0	0	0	0	0	0	3563200	0	0
sp|P20810|ICAL_HUMAN	0	0	0	0	0	0	0	0	0	18520000	0	0	0	0	0	6804200	4933800	0	0	0	0	0	0	0	0	0	0
sp|Q7Z4W2|LYZL2_HUMAN	0	0	0	0	0	0	28947000	18034000	0	0	0	0	0	0	0	0	0	0	0	0	0	0	0	0	0	28154000	0
sp|P52566|GDIR2_HUMAN	0	0	0	0	7586700	0	44347000	0	0	0	0	0	0	0	0	0	0	0	0	0	0	0	0	0	13937000	0	0
sp|Q9UK41|VPS28_HUMAN	0	0	0	0	0	0	0	0	0	0	0	0	0	227290	272290	1550500	0	0	0	0	0	0	0	0	0	0	0
sp|Q9BXF9|TEKT3_HUMAN	0	0	0	0	0	0	2148900	0	1936200	0	0	0	0	0	0	0	0	0	0	0	0	0	0	0	0	21810000	0
sp|O43776|SYNC_HUMAN	0	0	0	0	0	0	0	0	0	0	0	0	0	813580	0	4735000	2974400	0	0	0	0	0	0	0	0	0	0
sp|P25815|S100P_HUMAN	0	0	0	0	0	2962700	17430000	0	0	0	0	0	0	0	0	0	0	0	0	0	0	0	0	0	18681000	0	0
sp|Q93045|STMN2_HUMAN	0	0	0	0	0	0	4550200	11312000	0	0	0	10543000	0	0	0	0	0	0	0	0	0	0	0	0	0	0	0
sp|P06737|PYGL_HUMAN;sp|P11217|PYGM_HUMAN	0	0	0	0	0	0	0	0	0	0	0	0	0	0	532890	0	0	0	0	0	0	0	0	1627400	10187000	0	0
sp|P10809|CH60_HUMAN	0	0	0	0	0	0	8283400	0	0	0	0	0	0	0	0	4204200	8377700	0	0	0	0	0	0	0	0	0	0
sp|P63172|DYLT1_HUMAN	0	0	0	0	0	0	6895900	6263600	0	0	0	0	0	3913500	0	0	0	0	0	0	0	0	0	0	0	0	0
sp|P42224|STAT1_HUMAN	0	0	10828000	0	0	0	0	0	0	0	0	0	0	0	0	0	0	0	0	0	0	2717900	3105200	0	0	0	0
sp|P62081|RS7_HUMAN	0	0	0	0	0	0	0	0	0	0	0	0	0	1010000	506930	0	852980	0	0	0	0	0	0	0	0	0	0
sp|P31997|CEAM8_HUMAN	0	0	0	0	0	0	49537000	0	0	0	0	0	0	0	0	0	0	0	0	0	0	0	0	0	12189000	0	4339900
sp|P24158|PRTN3_HUMAN	0	0	0	0	0	0	62442000	0	0	0	0	0	0	0	0	0	0	0	0	0	0	0	0	0	111090000	27819000	0
sp|Q8NCL4|GALT6_HUMAN	0	0	0	0	4983700	5741800	7688600	0	0	0	0	0	0	0	0	0	0	0	0	0	0	0	0	0	0	0	0
sp|P49447|CY561_HUMAN	0	0	0	0	0	0	0	0	0	0	0	0	0	2416600	0	1228100	1774600	0	0	0	0	0	0	0	0	0	0
sp|Q6UWQ5|LYZL1_HUMAN	0	0	0	0	0	0	111700000	0	0	0	0	0	0	0	0	0	0	0	0	0	0	0	0	20455000	0	25548000	0
sp|Q2VIR3|IF2GL_HUMAN;sp|P41091|IF2G_HUMAN	0	0	0	0	0	2967300	2050100	1852000	0	0	0	0	0	0	0	0	0	0	0	0	0	0	0	0	0	0	0
sp|P53602|MVD1_HUMAN	0	0	0	0	0	0	0	0	0	0	0	0	0	0	2763200	0	21266000	0	0	0	0	0	0	4271400	0	0	0
sp|P36405|ARL3_HUMAN	0	0	0	0	0	0	0	0	0	0	0	0	0	7655100	0	5255400	2274300	0	0	0	0	0	0	0	0	0	0
sp|Q8IYS1|P20D2_HUMAN	0	0	0	17494000	6361500	9552400	0	0	0	0	0	0	0	0	0	0	0	0	0	0	0	0	0	0	0	0	0
sp|P14780|MMP9_HUMAN	0	0	0	0	0	0	122670000	0	0	0	0	0	0	0	0	0	0	0	0	0	0	0	0	0	91652000	7388100	0
sp|Q15185|TEBP_HUMAN	0	0	0	0	0	0	0	0	0	0	3823300	33415000	0	0	0	0	39837000	0	0	0	0	0	0	0	0	0	0
sp|P80511|S10AC_HUMAN	0	0	0	0	0	4453300	308900000	0	0	0	0	0	0	0	0	0	0	0	0	0	0	0	0	0	68991000	0	0
sp|Q9Y2T7|YBOX2_HUMAN	0	0	0	0	0	0	2214200	3493700	0	0	0	7568400	0	0	0	0	0	0	0	0	0	0	0	0	0	0	0
sp|Q9Y6C9|MTCH2_HUMAN	0	0	0	0	0	0	7905000	3489700	2323300	0	0	0	0	0	0	0	0	0	0	0	0	0	0	0	0	0	0
sp|Q8TEX9|IPO4_HUMAN	0	0	0	0	0	0	0	0	929410	0	0	0	0	0	0	0	0	0	0	0	0	0	0	0	3305600	981420	0
sp|Q9H0I9|TKTL2_HUMAN	0	0	0	0	0	0	6507600	16855000	0	0	0	6428400	0	0	0	0	0	0	0	0	0	0	0	0	0	0	0
sp|Q8NFT8|DNER_HUMAN	5691300	0	0	0	0	0	0	0	0	22878000	0	0	0	0	0	0	0	0	0	12655000	0	0	0	0	0	0	0
sp|O14896|IRF6_HUMAN	0	0	5140800	0	0	0	0	0	0	0	0	0	0	0	4026900	0	799320	0	0	0	0	0	0	0	0	0	0
sp|Q562R1|ACTBL_HUMAN	0	0	0	0	0	0	0	0	277300000	0	0	0	0	0	0	0	0	0	0	0	0	391950000	0	0	610010000	0	0
sp|Q8NHW5|RLA0L_HUMAN;sp|P05388|RLA0_HUMAN	0	0	2418600	0	0	0	0	0	0	0	0	0	0	0	0	0	0	3473200	0	0	9287600	0	0	0	0	0	0
sp|P06727|APOA4_HUMAN;CON__Q32PJ2	0	0	12589000	0	0	0	0	0	0	0	0	0	0	0	0	0	0	2089100	0	0	1246500	0	0	0	0	0	0
sp|Q9HB71|CYBP_HUMAN	0	0	55739000	0	0	0	0	0	0	0	0	0	0	0	0	0	38676000	0	0	16414000	0	0	0	0	0	0	0
sp|Q96CN7|ISOC1_HUMAN	0	6120100	0	0	0	13015000	0	0	0	0	0	0	0	12099000	0	7483400	0	0	0	0	0	0	0	0	0	0	0
sp|Q13023|AKAP6_HUMAN	0	0	0	0	0	0	0	0	0	0	0	0	0	24516000	0	31173000	0	0	0	0	0	0	0	0	0	41553000	39833000
sp|P37198|NUP62_HUMAN	0	0	0	0	0	0	4428400	2207600	1431400	0	0	0	0	0	0	0	0	0	0	0	0	0	0	0	0	5808100	0
sp|P01215|GLHA_HUMAN	0	0	0	7488800	0	0	0	0	0	0	0	0	0	0	0	0	0	0	0	0	0	0	0	0	6709700	6854300	6493200
sp|P09486|SPRC_HUMAN	0	0	0	0	0	0	0	0	4576700	0	0	7864100	6137600	0	0	0	0	0	0	0	0	0	0	0	0	5594000	0
sp|P38567|HYALP_HUMAN	0	0	0	0	3047400	0	13971000	3126900	0	0	0	0	0	0	0	0	0	0	0	0	0	0	0	0	0	7122900	0
sp|P20061|TCO1_HUMAN	0	0	0	0	497780	0	3891800	0	0	0	0	0	0	0	0	0	0	0	0	0	0	0	0	470750	2195300	0	0
sp|Q6PEW0|PRS54_HUMAN	0	0	0	7451300	0	0	21326000	8031800	0	0	5158700	0	0	0	0	0	0	0	0	0	0	0	0	0	0	0	0
sp|P36957|ODO2_HUMAN	0	0	0	6663600	0	3842800	12848000	2149200	0	0	0	0	0	0	0	0	0	0	0	0	0	0	0	0	0	0	0
sp|Q8N104|D106A_HUMAN	0	0	0	11933000	8918900	0	10207000	3301200	0	0	0	0	0	0	0	0	0	0	0	0	0	0	0	0	0	0	0
sp|Q13618|CUL3_HUMAN	0	0	0	1269300	1833800	0	5629700	2835600	0	0	0	0	0	0	0	0	0	0	0	0	0	0	0	0	0	0	0
sp|P12268|IMDH2_HUMAN	0	0	0	23039000	13105000	0	0	0	0	0	0	6018200	13888000	0	0	0	0	0	0	0	0	0	0	0	0	0	0
sp|Q96M98|PACRG_HUMAN	0	0	0	705750	535280	0	1524900	580450	0	0	0	0	0	0	0	0	0	0	0	0	0	0	0	0	0	0	0
sp|P01031|CO5_HUMAN;CON__Q1A7A4	0	0	8680100	0	0	0	0	0	0	0	0	0	0	0	0	0	0	1738800	0	0	753020	0	0	0	1063300	0	0
sp|P22894|MMP8_HUMAN	0	0	0	0	1211300	0	8850400	0	0	0	0	0	0	0	0	0	0	0	0	5532900	0	0	0	0	7729100	0	0
sp|Q15370|ELOB_HUMAN	0	0	0	0	0	8234000	0	22738000	7036200	0	0	10925000	0	0	0	0	0	0	0	0	0	0	0	0	0	0	0
sp|Q8TDL5|BPIB1_HUMAN	0	0	0	0	0	0	4705300	0	0	0	0	6484000	0	3662500	0	0	0	0	0	0	0	0	0	0	9841900	0	0
sp|P31939|PUR9_HUMAN	0	0	3306500	0	0	0	0	0	0	0	0	0	0	0	0	9284400	0	6406300	0	0	0	5718000	0	0	0	0	0
sp|P30740|ILEU_HUMAN	0	0	0	0	0	0	28965000	0	0	0	2705100	0	0	0	0	0	0	0	0	0	0	0	0	0	15528000	5481600	0
sp|P61160|ARP2_HUMAN	0	0	0	2614900	1929000	0	3117800	1956700	0	0	0	0	0	0	0	0	0	0	0	0	0	0	0	0	0	0	0
sp|Q9NYU2|UGGG1_HUMAN	0	0	0	0	10574000	0	25776000	10822000	0	0	0	0	0	0	0	0	0	0	0	0	0	0	0	12346000	0	0	0
sp|Q9C002|NMES1_HUMAN	0	0	0	0	0	0	49443000	129750000	0	0	0	0	0	18554000	0	0	9748200	0	0	0	0	0	0	0	0	0	0
sp|Q15008|PSMD6_HUMAN	0	0	0	0	0	5280900	0	0	2874500	0	0	5094200	0	0	0	0	0	0	0	0	0	0	0	0	0	3036900	0
sp|P22626|ROA2_HUMAN	0	0	0	0	0	0	7130000	8235300	0	0	0	0	0	0	0	0	0	0	0	0	0	0	0	0	6510700	3301900	0
sp|Q16543|CDC37_HUMAN	0	0	3641400	0	0	0	0	0	0	0	0	0	0	0	0	0	12370000	0	0	1869100	3396400	0	0	0	0	0	0
sp|Q96C24|SYTL4_HUMAN	0	0	0	6361700	846790	1171700	0	1406600	0	0	0	0	0	0	0	0	0	0	0	0	0	0	0	0	0	0	0
sp|P20930|FILA_HUMAN;CON__P20930	0	0	0	4410600000	3723600000	0	0	0	0	0	0	0	0	0	135620000	0	15156000000	0	0	0	0	0	0	0	0	0	0
sp|P0DTE8|AMY1C_HUMAN;sp|P0DTE7|AMY1B_HUMAN;sp|P19961|AMY2B_HUMAN;sp|P04746|AMYP_HUMAN;CON__Q3MHH8	0	0	0	0	0	0	0	0	0	2402500	45288000	9999400	0	0	0	0	0	0	0	0	0	0	0	0	2417800	0	0
sp|P46940|IQGA1_HUMAN	0	3563800	4319700	0	0	0	0	0	0	0	0	0	0	0	0	0	0	0	0	0	0	4495000	3555400	0	0	0	0
sp|O75951|LYZL6_HUMAN	0	0	0	0	0	0	451760000	133980000	0	0	0	0	0	0	0	0	68749000	0	0	0	0	0	0	0	0	86060000	0
sp|P48307|TFPI2_HUMAN	0	0	0	0	0	0	7114500	6679800	0	0	0	0	9633100	0	0	12655000	0	0	0	0	0	0	0	0	0	0	0
sp|P02656|APOC3_HUMAN	0	0	0	0	0	0	0	0	0	0	0	0	0	0	6426900	0	0	0	0	0	0	9797700	0	38678000	0	26452000	0
sp|Q86Y46|K2C73_HUMAN;CON__Q32MB2	0	0	2210500000	0	0	0	0	0	0	0	0	0	0	0	0	0	0	2020400000	2184700000	1537500000	0	0	0	0	0	0	0
sp|O95460|MATN4_HUMAN	0	3022500	0	0	0	0	0	0	6073800	11527000	0	0	0	0	0	0	0	0	0	0	0	0	0	0	0	0	4653100
sp|Q7Z304|MAMC2_HUMAN	36995000	0	0	0	0	0	0	0	0	0	0	0	0	0	0	0	0	0	0	0	0	0	0	156720000	0	20048000	49712000
sp|Q16563|SYPL1_HUMAN	0	0	0	0	0	0	0	0	0	0	0	0	0	0	0	0	13874000	13551000	0	9396800	0	8770600	0	0	0	0	0
sp|P28062|PSB8_HUMAN	2011100	0	6323600	0	0	0	0	0	0	0	0	0	0	0	0	0	0	3714400	4134900	0	0	0	0	0	0	0	0
sp|O60522|TDRD6_HUMAN	0	0	0	0	0	31487000	23695000	0	0	0	0	20772000	11934000	10069000	0	0	0	0	0	0	0	0	0	0	0	0	0
sp|Q99598|TSNAX_HUMAN	0	0	0	830370	523900	478220	723210	520190	0	0	0	0	0	0	0	0	0	0	0	0	0	0	0	0	0	0	0
sp|P31153|METK2_HUMAN;sp|Q00266|METK1_HUMAN	0	0	0	0	0	0	2790300	3863300	2994600	0	0	0	0	0	0	0	0	0	0	0	0	0	0	0	3588000	5654900	0
sp|P02452|CO1A1_HUMAN	4575300	0	32699000	0	0	10493000	0	0	0	0	0	0	8545200	0	0	0	0	0	2022500	0	0	0	0	0	0	0	0
sp|Q9Y2A9|B3GN3_HUMAN	0	0	0	13956000	3961800	2319000	4825800	0	3113900	0	0	0	0	0	0	0	0	0	0	0	0	0	0	0	0	0	0
sp|Q15819|UB2V2_HUMAN;sp|Q13404|UB2V1_HUMAN	0	0	2255200	0	0	0	14403000	0	0	0	0	0	0	0	0	9742300	0	0	0	0	0	0	0	6544200	9267800	0	0
sp|O75602|SPAG6_HUMAN	0	0	0	1986700	0	0	2099700	5717200	1942600	0	0	0	0	0	0	0	0	0	0	0	0	0	0	0	0	3251000	0
sp|P63010|AP2B1_HUMAN	0	0	0	18988000	12000000	9978500	2442200	0	0	0	0	0	0	0	0	0	0	0	0	0	0	0	0	4659700	0	0	0
sp|Q9BUF5|TBB6_HUMAN	0	0	0	46571000	0	37198000	0	35222000	19593000	0	0	0	0	0	0	0	137820000	0	0	0	0	0	0	0	0	0	0
sp|O60282|KIF5C_HUMAN;sp|Q12840|KIF5A_HUMAN	0	24710000	11063000	0	0	0	0	0	0	0	0	0	0	0	0	0	0	0	0	9755700	18519000	100600000	0	0	0	0	0
sp|Q8TAA3|PSMA8_HUMAN	0	0	0	2392400	0	0	17343000	2617600	0	0	0	0	0	0	0	0	0	0	0	0	0	0	0	0	0	10121000	845710
sp|P34949|MPI_HUMAN	0	0	0	44561000	8330100	7740800	0	0	0	0	0	0	0	0	0	0	3792800	0	0	0	0	0	0	102470000	0	0	0
sp|P21281|VATB2_HUMAN;sp|P15313|VATB1_HUMAN	0	0	0	0	0	0	7487500	5514100	10800000	0	0	0	0	0	0	0	0	0	0	0	0	0	0	0	0	6597200	4872200
sp|Q99447|PCY2_HUMAN	0	0	0	0	5186700	0	6772100	4292400	0	0	0	0	0	0	0	0	0	0	0	0	0	0	0	0	5015400	5716900	0
sp|Q10589|BST2_HUMAN	0	0	40299000	0	0	0	0	0	0	0	0	0	0	0	0	0	11707000	0	13296000	0	0	97381000	52239000	0	0	0	0
sp|Q15843|NEDD8_HUMAN	0	0	0	4541500	1772300	0	9600700	0	6926700	0	0	0	0	0	0	0	0	0	0	0	0	0	0	0	0	9912800	0
sp|P16403|H12_HUMAN	0	0	0	0	0	0	24292000	0	0	7729700	6555100	0	10116000	0	0	0	0	0	0	0	0	0	0	0	28162000	0	0
sp|Q9Y266|NUDC_HUMAN	0	0	0	0	0	0	0	0	0	0	0	0	0	1896900	1911400	1522900	8668900	0	0	0	0	0	0	1582700	0	0	0
sp|Q96HC4|PDLI5_HUMAN	0	0	0	0	6341800	9360500	3219100	0	0	0	3087000	0	14324000	0	0	0	0	0	0	0	0	0	0	0	0	0	0
sp|Q12913|PTPRJ_HUMAN	0	0	0	0	0	0	0	0	0	0	0	5936000	3765000	4310000	0	5736700	17519000	0	0	0	0	0	0	0	0	0	0
sp|Q9Y2E5|MA2B2_HUMAN	0	0	0	0	0	0	0	0	8733300	0	0	0	0	0	7485900	6622500	0	0	3857700	0	0	0	0	0	0	0	5597200
sp|Q6NUS6|TECT3_HUMAN	0	0	0	4566900	0	3705600	4483800	6214200	0	0	0	0	0	0	0	0	0	0	0	0	4214700	0	0	0	0	0	0
sp|P68400|CSK21_HUMAN	0	0	0	0	0	8937500	13669000	0	0	0	6009700	0	0	0	0	6693600	7335300	0	0	0	0	0	0	0	0	0	0
sp|P63244|RACK1_HUMAN	0	0	16045000	0	0	0	0	0	0	0	0	0	0	7927400	10175000	0	10413000	4712300	0	0	0	0	0	0	0	0	0
sp|Q71DI3|H32_HUMAN	0	0	0	0	0	0	52118000	13341000	15919000	0	0	0	0	0	0	0	0	0	0	0	0	0	0	0	18418000	8977100	0
sp|Q9NSD9|SYFB_HUMAN	0	0	0	0	0	0	12127000	10099000	6648800	0	0	0	0	0	0	0	12962000	0	0	0	0	0	0	0	0	12220000	0
sp|O60763|USO1_HUMAN	0	0	0	5683400	0	0	0	11142000	0	8404600	0	0	0	0	3641200	0	12052000	0	0	0	0	0	0	0	0	0	0
sp|P08246|ELNE_HUMAN	0	0	3288700	0	0	0	77952000	0	0	0	0	0	0	0	0	0	0	2670300	0	0	0	0	0	0	228390000	15655000	0
sp|O75787|RENR_HUMAN	0	0	7843100	2231300	0	0	1832200	0	0	13995000	0	0	0	944540	0	0	0	0	0	0	0	0	0	0	0	0	0
sp|Q15785|TOM34_HUMAN	0	0	0	3731400	0	0	3037000	20474000	0	0	0	10217000	0	0	0	0	0	0	0	0	0	0	0	0	3902200	0	0
sp|Q9BS26|ERP44_HUMAN	0	0	0	0	0	0	33568000	0	0	0	0	0	0	0	10668000	16174000	23181000	0	0	0	0	0	0	0	5666800	0	0
sp|P15374|UCHL3_HUMAN	0	0	0	0	0	0	0	0	0	0	0	5772300	0	36551000	9737600	0	22894000	0	0	0	0	0	0	19246000	0	0	0
sp|P04844|RPN2_HUMAN	0	0	0	3084400	0	3388700	8821800	0	0	0	0	0	0	0	0	0	0	0	0	0	0	0	0	0	12186000	4970500	0
sp|P04080|CYTB_HUMAN	4307300	0	0	0	0	0	0	0	0	0	0	0	0	0	0	0	0	4918500	0	6043600	4523800	0	3772300	0	0	0	0
sp|P19823|ITIH2_HUMAN;CON__Q9TRI1	1292300	0	33513000	0	0	1569300	0	1016200	0	0	0	0	0	0	0	0	0	1995900	0	0	0	0	0	0	0	0	0
sp|Q9H4M9|EHD1_HUMAN;sp|Q9NZN4|EHD2_HUMAN	2517400	0	0	6257400	0	2113600	0	0	0	0	0	0	0	0	0	0	3475800	0	0	0	0	0	0	0	0	3240000	0
sp|P54920|SNAA_HUMAN	0	0	3060400	0	0	0	0	0	0	0	0	0	0	0	0	0	0	0	2817200	3556600	4994700	3490400	0	0	0	0	0
sp|Q38SD2|LRRK1_HUMAN	176640000	108330000	0	0	0	0	0	0	0	0	0	0	0	0	0	0	0	62437000	50590000	29735000	0	0	0	0	0	0	0
sp|Q9Y365|STA10_HUMAN	0	0	0	15347000	0	8952700	0	7912800	0	0	0	7332000	7396200	0	0	0	0	0	0	0	0	0	0	0	0	0	4289800
sp|Q9H8H0|NOL11_HUMAN	0	0	0	5843100	0	0	13930000	15248000	5219300	0	0	0	0	0	0	30643000	0	0	0	0	0	0	0	0	0	0	6918400
sp|O15305|PMM2_HUMAN	0	0	0	5338000	0	3037800	0	3154400	0	0	3600600	3702000	4847800	0	0	0	0	0	0	0	0	0	0	0	0	0	0
sp|P50591|TNF10_HUMAN	0	0	0	3977400	0	0	0	0	0	0	0	0	5934900	0	0	0	0	2423700	1662000	0	4178100	0	0	0	0	3270300	0
sp|O00303|EIF3F_HUMAN	0	0	0	890950	763580	533880	1803900	974350	0	0	0	0	0	0	0	0	0	0	0	0	0	0	0	1713400	0	0	0
sp|P62249|RS16_HUMAN	0	6818100	3469000	0	0	0	0	0	0	0	0	0	0	0	0	0	0	3817700	4315200	0	3895900	4076000	0	0	0	0	0
sp|P13284|GILT_HUMAN	0	0	7694300	0	0	0	0	0	0	55088000	0	0	0	0	0	0	0	0	2461800	0	0	0	0	0	16715000	15623000	7179000
sp|Q9H9S4|CB39L_HUMAN	0	0	0	19903000	0	5281500	0	5301900	0	0	4364500	0	3644400	0	0	0	0	0	0	0	0	0	0	0	0	0	1786800
sp|Q8TC27|ADA32_HUMAN	0	0	0	0	0	0	14275000	14090000	0	0	0	0	0	5275200	0	2907600	1709100	0	0	0	0	0	0	5069000	0	0	0
sp|P67936|TPM4_HUMAN	0	0	0	0	0	0	0	0	8358400	0	0	0	7418700	0	7139700	4445500	9343600	0	0	0	0	0	0	0	4983700	0	0
sp|Q9UM22|EPDR1_HUMAN	0	0	0	0	0	1644000	0	0	0	0	2813300	4033300	0	3119600	0	12747000	0	0	0	0	0	0	0	0	0	0	3542200
sp|P58546|MTPN_HUMAN	0	0	0	2389200	18187000	6616900	24150000	0	0	0	0	16253000	0	0	0	0	0	0	0	0	0	0	0	8969800	0	0	0
sp|Q9C005|DPY30_HUMAN	0	0	0	7974800	2118700	1365000	8670000	3940800	0	0	0	1191800	0	0	0	0	0	0	0	0	0	0	0	0	0	0	0
sp|Q8NG35|D105A_HUMAN	0	0	0	7477400	4370600	0	0	0	4741200	0	0	0	0	6831500	0	0	3179700	0	0	0	0	0	0	4830700	0	0	0
sp|Q9HCN3|PGAP6_HUMAN	0	0	0	0	0	16954000	45631000	8255300	0	0	9930000	0	0	0	0	5228900	3071500	0	0	0	0	0	0	0	0	0	0
sp|P07311|ACYP1_HUMAN	0	0	0	0	0	2644200	4410100	8444200	0	0	2787000	4904000	0	0	0	0	0	0	0	0	0	0	0	0	0	3840300	0
sp|P09529|INHBB_HUMAN	0	0	0	0	0	0	0	0	28757000	0	0	0	0	10904000	0	0	0	0	0	0	44897000	0	0	6440900	6641300	9233700	0
sp|Q14997|PSME4_HUMAN	0	0	0	3403700	6600500	0	7295600	2902500	3687800	0	0	0	0	0	0	0	0	0	0	0	0	0	0	0	0	5817900	0
sp|P20062|TCO2_HUMAN	0	0	0	3727400	0	0	9531700	8259200	0	4751400	3786400	9911600	0	0	0	0	0	0	0	0	0	0	0	0	0	0	0
sp|P26572|MGAT1_HUMAN	7402900	13467000	0	0	0	7259200	6667400	9648600	0	0	0	0	0	0	26291000	0	0	0	0	0	0	0	0	0	0	0	0
sp|Q16881|TRXR1_HUMAN	0	0	0	0	0	0	5375500	4890300	0	0	0	0	0	0	0	0	7638100	0	0	0	0	0	0	5840600	3958100	5557600	0
sp|P12814|ACTN1_HUMAN	0	0	0	0	0	44030000	31939000	15111000	0	0	5876500	0	0	0	0	0	0	0	0	0	0	0	0	0	13439000	0	7277200
sp|Q9UNZ2|NSF1C_HUMAN	0	0	0	9022700	9006900	0	12269000	20800000	0	0	0	0	0	0	0	0	5741400	0	0	0	0	0	0	0	0	5506800	0
sp|P45880|VDAC2_HUMAN	0	0	0	0	0	0	26871000	12163000	17220000	0	9804500	15631000	0	0	0	0	0	0	0	0	0	0	0	0	0	29019000	0
sp|P52292|IMA1_HUMAN	0	0	0	0	0	0	11656000	34418000	0	6785200	0	0	0	0	9662000	0	34140000	0	0	0	0	0	0	0	0	14696000	0
sp|Q8IYS8|BD1L2_HUMAN	0	0	0	4132400	4150400	0	7007400	3288800	0	0	0	4829600	0	2186000	0	0	0	0	0	0	0	0	0	0	0	0	0
sp|P04179|SODM_HUMAN	0	0	0	5157400	0	4097000	29593000	0	4837200	0	0	0	0	0	0	0	0	0	0	0	0	0	0	0	8790400	9429500	0
sp|P01594|KV133_HUMAN;sp|P01593|KVD33_HUMAN	0	0	32695000	0	0	0	28776000	0	0	0	2763400	0	0	0	0	0	0	0	5559900	0	0	0	0	0	6860800	6709700	0
sp|P01877|IGHA2_HUMAN	0	0	76008000	0	0	0	0	0	0	0	0	0	0	616010000	0	0	17810000	0	33465000	79053000	0	0	0	192800000	0	0	0
sp|Q3ZCM7|TBB8_HUMAN	0	0	0	107030000	0	0	0	0	0	0	41282000	0	0	0	14412000	66318000	224340000	0	0	0	0	0	0	155230000	0	0	0
sp|P22680|CP7A1_HUMAN	0	0	0	35498000	46595000	0	0	0	0	0	0	0	0	233100000	72154000	65740000	0	0	0	0	0	0	0	376950000	0	0	0
sp|P28161|GSTM2_HUMAN	0	0	0	13881000	0	0	2856300	4176900	0	0	2588200	0	5940100	0	0	0	3195400	0	0	0	0	0	0	0	0	0	0
sp|Q99715|COCA1_HUMAN	0	0	100670000	0	0	0	0	0	0	0	0	0	0	0	0	0	0	253830000	545070000	251840000	278510000	0	6426700	0	0	0	0
sp|P02760|AMBP_HUMAN	0	0	45511000	0	0	0	83955000	0	6332300	0	0	0	0	0	0	0	3847800	26407000	0	0	0	0	0	0	22042000	0	0
sp|Q9NS68|TNR19_HUMAN	0	0	0	0	0	0	0	2682200	0	0	4662000	7051500	0	0	6298200	0	0	2895700	0	4014000	0	0	0	0	0	0	0
sp|P29144|TPP2_HUMAN	0	0	0	6127200	5719800	0	16498000	5699000	0	0	0	0	0	0	0	0	15466000	0	0	0	0	0	0	0	0	4927900	0
sp|Q5T5C0|STXB5_HUMAN	0	0	43028000	0	0	0	0	0	0	0	0	0	0	0	0	0	0	3012000	3229600	1803300	2850400	2258100	0	0	0	0	0
sp|O15127|SCAM2_HUMAN	0	0	0	0	0	11927000	11567000	76214000	7320400	0	0	0	0	0	0	0	0	0	0	0	0	0	0	0	5785100	6925900	4959900
sp|P15104|GLNA_HUMAN	0	0	0	0	0	6826900	11272000	18269000	5130400	0	5289200	9238400	0	0	0	0	0	0	0	0	0	0	0	0	0	9769400	0
sp|B1AK53|ESPN_HUMAN	0	0	0	0	0	13439000	4603500	6938400	5716200	6167400	0	0	0	0	0	0	0	0	0	0	0	0	0	0	2727200	6763200	0
sp|Q9BXT2|CCG6_HUMAN	0	0	0	14004000	0	0	0	0	7163400	8007800	0	8195900	5858300	0	2994800	0	4520800	0	0	0	0	0	0	0	0	0	0
sp|P21796|VDAC1_HUMAN	0	0	0	9201800	0	0	11445000	12492000	6890600	0	1632500	0	0	0	0	0	0	0	0	0	0	0	0	0	28589000	69995000	0
sp|O95834|EMAL2_HUMAN	0	0	0	28304000	0	25689000	0	9304300	16356000	0	0	0	11009000	0	14785000	0	0	0	0	0	0	0	0	0	13026000	0	0
sp|Q9HDC9|APMAP_HUMAN	0	0	0	13525000	0	0	9214800	8217200	0	0	0	0	0	1008700	0	0	2163000	0	0	0	0	0	0	0	3650600	4792000	0
sp|P49901|MCSP_HUMAN	0	0	0	1760600	1664500	0	23935000	3161100	2757800	0	0	0	0	0	0	0	3139700	0	0	0	0	0	0	0	0	10876000	0
sp|Q9UNM6|PSD13_HUMAN	0	0	0	0	0	573320	1805600	1029400	2062100	1422200	0	0	0	0	0	0	0	0	0	0	0	0	0	0	1318900	5768100	0
sp|P35625|TIMP3_HUMAN	0	0	10697000	0	0	0	0	0	0	0	0	0	0	0	0	9507300	7159900	11161000	13231000	5419900	13055000	0	0	0	0	0	0
sp|Q99733|NP1L4_HUMAN	0	0	0	0	3471500	2900100	0	4044600	0	0	0	0	3016000	0	0	0	0	2797400	0	0	6817600	0	4674500	0	0	0	0
sp|Q96PU9|ODF3A_HUMAN	0	0	0	13984000	0	3691300	5433800	6609300	0	0	8607700	0	0	0	0	0	945310	0	0	0	0	0	0	0	0	8973100	0
sp|Q9UBS3|DNJB9_HUMAN	0	0	0	0	25784000	3916700	2703300	0	0	9588400	0	12309000	9322700	0	0	0	0	0	0	0	0	0	0	0	0	0	4676900
sp|P01037|CYTN_HUMAN	0	0	0	0	9165200	27126000	0	0	7749800	0	9349000	11462000	0	0	0	0	0	0	0	0	0	0	0	4916200	14536000	0	0
sp|Q13724|MOGS_HUMAN	0	0	0	3495700	5601100	3327700	3324000	4453000	2156800	6823500	0	0	0	0	0	0	0	0	0	0	0	0	0	0	0	0	0
sp|Q9H0E2|TOLIP_HUMAN	0	0	0	0	0	28820000	20733000	26921000	0	0	14464000	0	15608000	0	0	0	0	0	0	0	0	0	0	0	20851000	0	11485000
sp|P62424|RL7A_HUMAN	0	0	0	0	0	6888500	12099000	7950400	0	0	0	5128200	0	0	0	4507400	0	0	0	0	0	0	0	7152900	0	5642300	0
sp|P09237|MMP7_HUMAN	0	0	0	0	4814600	0	17254000	0	0	0	3736900	0	0	9497100	5666800	0	0	0	8555200	0	0	0	0	17352000	0	0	0
sp|Q9UNN8|EPCR_HUMAN	0	0	0	0	0	0	1504500	3330100	1897400	20574000	0	6290700	0	0	0	0	2208700	0	0	0	0	0	0	0	0	0	1848700
sp|P55060|XPO2_HUMAN	0	0	0	0	0	0	5836300	47500000	0	0	0	0	0	2541600	6882500	0	8673100	23748000	0	0	0	25739000	0	0	0	0	0
sp|Q9NQ36|SCUB2_HUMAN;sp|Q8IWY4|SCUB1_HUMAN	0	9872500	0	18355000	8789700	9759300	24457000	9622000	0	0	0	0	0	0	0	0	0	0	0	8331100	0	0	0	0	0	0	0
sp|P04040|CATA_HUMAN	0	0	0	10788000	5692900	0	30269000	0	0	0	0	0	0	7337400	0	6583000	0	0	0	0	0	0	0	0	10054000	8888700	0
sp|Q92692|NECT2_HUMAN	0	0	0	14138000	0	54937000	11109000	12266000	11506000	0	10811000	0	9852100	0	0	0	0	0	0	0	0	0	0	0	0	0	0
sp|Q9NTJ4|MA2C1_HUMAN	0	0	0	9096300	3986800	1633500	40999000	7555200	0	0	0	0	0	0	0	0	0	0	0	0	0	0	0	0	5131700	12003000	0
sp|P51854|TKTL1_HUMAN	0	0	0	0	0	0	1681700	57549000	0	0	0	5588600	0	0	5209000	0	15137000	0	0	0	0	6788400	0	0	7745600	0	0
sp|Q9BY67|CADM1_HUMAN	0	0	0	0	0	13950000	17506000	14087000	0	0	10482000	16144000	0	10865000	0	0	19055000	0	0	0	0	0	0	0	0	0	0
sp|P61978|HNRPK_HUMAN	0	0	0	0	0	2882300	0	72593000	5727100	0	0	0	0	0	10976000	0	16690000	0	0	0	0	0	0	0	9890000	5937100	0
sp|Q8NEX5|WFDC9_HUMAN	0	0	0	24042000	0	53761000	183140000	65467000	0	0	16276000	20801000	0	0	0	0	0	0	0	0	0	0	0	23985000	0	0	0
sp|P60983|GMFB_HUMAN	0	0	4266700	4373300	0	2580400	0	0	0	0	2800300	6172100	5269600	0	0	3017800	0	0	0	0	0	0	0	0	0	0	0
sp|Q15631|TSN_HUMAN	0	0	0	0	0	0	7778200	63453000	0	0	0	0	0	5482500	0	7814900	23825000	0	0	0	0	12220000	0	0	0	2742000	0
sp|Q86UN2|R4RL1_HUMAN	17028000	0	0	6154900	4445500	0	0	15294000	0	0	11019000	0	6754900	0	0	0	0	0	0	0	3906800	0	0	0	0	0	0
sp|Q8TB96|TIP_HUMAN	0	3675500	3696400	0	0	0	0	0	0	0	0	0	12438000	0	0	0	0	4427800	4114800	5162500	5236000	7058400	0	0	0	0	0
sp|P61923|COPZ1_HUMAN	0	0	0	2355600	1896100	0	1832300	0	0	0	2367500	2387600	2167700	1552100	1686800	0	0	0	0	0	0	0	0	0	0	0	0
sp|Q92823|NRCAM_HUMAN	0	0	0	8939100	7373800	13192000	9001500	14697000	0	0	3479900	0	0	0	0	0	0	0	0	0	0	0	0	0	19081000	0	12726000
sp|P78417|GSTO1_HUMAN	0	0	0	15049000	0	19185000	24288000	13211000	8800500	0	10049000	33729000	0	0	0	0	0	0	0	0	0	0	0	0	0	9537300	0
sp|P61106|RAB14_HUMAN	0	0	0	16261000	0	7634300	50331000	11500000	10518000	0	15694000	0	0	0	0	0	0	0	0	0	0	0	0	0	9948700	15402000	0
sp|P35613|BASI_HUMAN	0	0	0	56318000	18622000	8280000	17957000	23990000	0	0	0	0	0	0	0	0	0	0	0	0	0	0	0	0	5995300	15629000	5828200
sp|P04632|CPNS1_HUMAN	0	0	0	0	0	0	0	0	1209600	502370	0	0	0	0	732850	462900	0	0	0	0	0	0	0	1773100	514820	437950	299430
sp|P08240|SRPRA_HUMAN	0	0	0	7048500	3394200	0	3382300	0	1052100	7287400	0	1197300	0	0	0	0	0	0	0	0	0	0	0	0	1739900	0	1259400
sp|Q17RY6|LY6K_HUMAN	0	0	0	12750000	6807100	0	9140300	9989300	0	0	0	0	0	3928800	0	0	3554700	0	0	0	0	0	0	5445300	0	6273700	0
sp|Q8NFU3|TSTD1_HUMAN	0	0	0	0	0	0	8383600	0	7141600	0	5976700	8245900	6185800	0	0	0	0	0	0	0	0	0	0	0	4853100	5692600	4427300
sp|Q6X784|ZPBP2_HUMAN	0	0	0	12058000	9307300	11349000	20389000	0	0	7737600	5535700	9121100	0	0	0	0	3262500	0	0	0	0	0	0	0	0	0	0
sp|Q92882|OSTF1_HUMAN	0	0	0	5429500	1214900	819880	0	6114900	2178000	0	784530	0	0	0	0	0	0	0	0	0	0	0	0	0	3862200	1457000	0
sp|P38571|LICH_HUMAN	0	0	0	8816700	0	13037000	21149000	10049000	0	9398000	9348800	0	0	0	0	0	0	0	0	0	0	0	0	12899000	0	12817000	0
sp|P17858|PFKAL_HUMAN	2654000	4569000	3819000	0	0	0	0	0	7368600	0	0	0	0	0	0	0	0	0	0	0	4128100	0	0	0	6426700	3868800	4108700
sp|P04114|APOB_HUMAN	0	0	137360000	0	0	197070000	0	0	0	1229100000	0	86624000	128170000	0	0	0	0	19625000	0	0	0	0	0	0	547150000	0	100130000
sp|P02753|RET4_HUMAN	0	0	26736000	0	0	0	0	0	0	0	0	13554000	0	0	0	0	0	0	4957000	5473700	7004200	0	0	5596900	7769600	7734200	0
sp|P09622|DLDH_HUMAN	0	0	0	0	0	11867000	28025000	24142000	0	0	8100200	0	6154900	0	0	0	10991000	0	0	0	0	0	0	3336300	0	11581000	0
sp|Q99969|RARR2_HUMAN	0	0	14499000	4540900	0	0	0	0	0	16480000	0	0	0	3475700	0	0	10313000	1501600	0	0	3317800	0	0	2169500	0	0	0
sp|Q15121|PEA15_HUMAN	0	0	0	16017000	4010600	3579300	3299500	3914300	0	0	2901000	3391400	3240700	0	0	0	0	0	0	0	0	0	0	0	0	0	0
sp|P62491|RB11A_HUMAN	0	0	0	9123700	1384900	0	1538200	3055300	0	0	0	0	754100	2786500	2554100	0	0	0	0	0	0	0	0	4424100	0	0	0
sp|Q8NBX0|SCPDL_HUMAN	0	0	0	3034800	1718200	0	9814500	3450800	0	0	0	1129300	0	1654700	1417600	0	0	0	0	0	0	0	761540	0	0	0	0
sp|Q6EMK4|VASN_HUMAN	0	0	0	2890900	0	12553000	3060800	3599200	0	18915000	0	13935000	0	0	0	0	0	0	0	0	0	0	0	0	5202300	11780000	0
sp|P22061|PIMT_HUMAN	0	0	0	8440800	0	0	0	15228000	0	0	0	7705800	0	11055000	5079100	8358400	29808000	0	0	0	0	0	0	6651700	0	0	0
sp|Q8NI22|MCFD2_HUMAN	0	0	0	24573000	9628200	9881400	21893000	13631000	0	48842000	0	15184000	0	0	0	0	0	0	0	0	0	0	0	0	0	0	11176000
sp|P11940|PABP1_HUMAN;sp|Q9H361|PABP3_HUMAN;sp|Q13310|PABP4_HUMAN	0	0	0	0	0	5112900	6525200	11231000	0	0	0	0	0	6453400	8209000	0	24814000	0	0	0	0	0	0	0	5348300	5439400	0
sp|O43396|TXNL1_HUMAN	0	0	8567400	0	0	0	0	0	0	0	0	0	0	0	0	0	0	8489700	7104600	6140500	14456000	10812000	18381000	0	1214900	0	0
sp|P46459|NSF_HUMAN	0	0	0	0	0	0	5703700	6347300	5601200	0	0	0	0	0	5276900	0	16899000	0	0	5675800	30225000	0	0	0	0	13935000	0
sp|Q16706|MA2A1_HUMAN	0	0	0	6467700	3293500	9949000	0	0	18539000	12947000	0	0	0	0	0	0	0	0	0	0	8487400	0	0	0	15494000	0	6424900
sp|A6NDG6|PGP_HUMAN	0	0	0	5748600	8000500	2767600	8627100	4656800	0	4480400	0	0	0	0	0	0	0	0	0	0	0	0	0	0	9843800	4170700	0
sp|Q5JU69|TOR2A_HUMAN	0	0	3235200	7975400	13324000	1316900	1972700	0	0	0	0	3229900	0	0	0	0	0	849620	448370	1108600	0	0	0	0	0	0	0
sp|Q5JQC4|CT47A_HUMAN	0	0	0	0	0	2642300	21253000	6027600	0	0	0	6342400	0	0	7118500	6906000	35774000	0	0	0	0	0	0	0	4673300	7724500	0
sp|Q9GZM7|TINAL_HUMAN	0	1123400	0	2052600	7991000	0	0	0	0	0	0	0	1943400	161170	0	0	0	173340	2343100	3834800	0	0	0	587110	0	0	0
sp|P00736|C1R_HUMAN	0	0	10193000	2734100	0	0	6123000	0	0	0	3831000	0	0	0	0	0	0	2408300	2218700	0	2401800	0	0	0	0	20463000	3568400
sp|O43852|CALU_HUMAN	0	0	0	42744000	14620000	15633000	19884000	14359000	0	20666000	0	0	0	0	0	19013000	11195000	0	0	0	0	0	0	0	0	0	7735900
sp|Q16775|GLO2_HUMAN	0	50730000	0	15701000	0	9156200	7579600	37169000	12810000	0	0	0	0	0	0	0	6494100	0	0	0	0	0	0	0	8086600	11011000	0
sp|P21246|PTN_HUMAN	13481000	0	0	10531000	0	15713000	0	23104000	24682000	0	9759400	10402000	0	0	0	0	0	0	0	0	0	16837000	0	0	0	19293000	0
sp|P0C5Z0|H2AB2_HUMAN;sp|P0C5Y9|H2AB1_HUMAN	0	0	0	12949000	4646300	8755000	41347000	7938700	0	0	4659000	0	0	0	0	0	3441300	0	0	0	0	0	3668900	0	0	5628900	0
sp|P62888|RL30_HUMAN	0	0	0	0	0	0	13229000	8842000	6808500	0	5982700	11265000	0	17700000	0	8455400	13888000	0	0	0	0	0	0	0	0	9611000	0
sp|P14543|NID1_HUMAN	0	0	0	0	0	0	0	0	0	0	0	0	0	0	0	1326500	0	0	2345300	7482600	1266900	11885000	2460400	118230	1290800	15286000	0
sp|Q71UI9|H2AV_HUMAN;sp|P0C0S5|H2AZ_HUMAN	2787700	0	0	13182000	2877500	1696500	21335000	12457000	0	0	0	3359500	0	42945000	0	0	3669800	0	0	0	0	0	0	0	0	0	0
sp|P28070|PSB4_HUMAN	0	0	0	38678000	43365000	35735000	40638000	0	0	0	33593000	42538000	0	4375200	8745300	0	0	0	0	0	0	0	0	0	0	54804000	0
sp|P55145|MANF_HUMAN	0	0	0	35196000	14509000	0	50683000	33017000	0	0	0	17922000	0	0	0	0	3941800	0	0	0	0	0	0	13165000	14260000	16562000	0
sp|P08311|CATG_HUMAN	0	0	0	14914000	5793600	7618300	43775000	0	11331000	0	0	0	6995700	0	0	0	0	1949300	0	0	0	2075400	0	0	61471000	0	0
sp|Q92859|NEO1_HUMAN	0	0	0	10327000	6311500	2403800	4490800	3879600	4278200	7223400	0	0	0	0	0	0	0	0	0	0	0	0	0	0	0	10215000	3603600
sp|P68431|H31_HUMAN	0	0	0	0	24075000	0	121240000	19017000	5978700	5746000	4472700	5530000	0	0	0	0	0	0	0	0	0	0	0	0	30278000	6385400	0
sp|Q14257|RCN2_HUMAN	7734200	0	0	12231000	0	9289400	0	29964000	0	14414000	0	21249000	0	0	12144000	0	66648000	0	0	0	0	0	0	0	0	10402000	0
sp|P61088|UBE2N_HUMAN;sp|Q5JXB2|UE2NL_HUMAN	0	0	0	6004000	0	2900800	5607800	5997300	12955000	0	0	7617900	5055400	0	0	0	0	0	0	0	0	0	0	0	14088000	8870300	0
sp|P01871|IGHM_HUMAN	0	0	154140000	0	1296700	0	12185000	0	0	0	826420	2012700	0	0	0	0	0	710540	823260	0	0	0	0	0	0	12184000	6724700
sp|O75952|CABYR_HUMAN	0	0	0	20011000	34654000	8594100	71709000	13958000	0	0	50834000	0	0	0	0	0	0	18892000	0	0	11418000	0	11163000	0	0	0	0
sp|O15144|ARPC2_HUMAN	4548300	0	0	0	5379700	4652000	15637000	0	0	0	0	5981300	6754900	0	4966500	4888800	0	0	0	0	0	0	4263300	0	0	0	0
sp|P14778|IL1R1_HUMAN	6538900	0	0	0	0	12338000	28234000	0	0	0	12813000	27654000	16955000	6289900	0	0	12858000	0	0	0	0	0	0	0	0	0	10540000
sp|Q8TDM5|SACA4_HUMAN	0	0	0	0	8275400	0	24575000	17897000	0	0	17480000	0	0	3683700	0	3532300	6325800	0	0	0	0	0	0	13278000	0	20925000	0
sp|P06703|S10A6_HUMAN	0	0	0	8105800	0	3603700	20028000	4538500	0	2578000	7296200	0	5790200	0	0	0	0	0	0	0	0	0	3556000	17314000	0	0	0
sp|P43487|RANG_HUMAN	0	0	0	11062000	14943000	0	19252000	16868000	0	0	0	25469000	0	0	0	4368700	5392300	0	0	0	0	0	0	0	7478300	8207500	0
sp|A0AVT1|UBA6_HUMAN	2398900	2781500	0	8339400	0	0	3947200	2000600	4434000	0	0	0	0	0	0	0	0	0	0	0	2981100	3669000	0	0	0	3909500	0
sp|P17936|IBP3_HUMAN	7687400	0	6852100	0	8937000	25619000	5971200	0	8348300	0	0	0	69103000	0	6614000	0	4359300	0	0	0	0	0	0	0	0	0	0
sp|Q14749|GNMT_HUMAN	13696000	0	0	6257600	0	3293800	0	12377000	28123000	10138000	0	0	5035000	0	0	10204000	0	0	0	0	0	0	0	0	2649500	0	0
sp|Q86UD1|OAF_HUMAN	0	10176000	12876000	0	0	0	0	0	0	0	0	0	0	13602000	33605000	13211000	0	6495300	0	3933000	5416900	0	4113400	0	0	0	0
sp|Q96BQ1|FAM3D_HUMAN	0	15035000	0	0	0	0	0	4763300	0	0	0	23841000	9183200	0	0	0	23733000	0	14977000	8497200	9613300	0	0	0	0	0	5486600
sp|Q9NZP8|C1RL_HUMAN	7577800	46665000	31009000	0	0	0	0	0	0	0	0	0	0	0	0	0	0	11501000	133570000	166250000	28738000	4422700	3935800	0	0	0	0
sp|Q8NI32|LPD6B_HUMAN	2294600	2455700	6235400	4458000	4754400	0	0	0	0	4156100	4328900	6972200	0	0	0	3434900	0	0	0	0	0	0	0	0	0	0	0
sp|P25685|DNJB1_HUMAN	0	0	1454600	0	1795000	1895500	2208800	1293900	0	0	0	0	0	0	0	2409100	0	1981700	773210	1000400	1670500	0	0	0	0	0	0
sp|P11532|DMD_HUMAN	0	0	0	132520000	0	226400000	172100000	153990000	0	0	78653000	404960000	180700000	415410000	0	0	0	0	0	0	0	0	0	124350000	524710000	0	0
sp|Q96N03|VTM2L_HUMAN	0	0	0	37868000	15913000	0	15034000	12658000	9585600	0	12770000	26858000	15571000	5771400	7825800	0	0	0	0	0	0	0	0	0	0	0	0
sp|Q9Y4E6|WDR7_HUMAN	0	0	0	1594500	1214400	0	0	1216400	1643700	1179200	711590	1151600	1282500	0	0	0	0	0	0	0	0	0	0	0	546330	1228300	0
sp|A0A075B6K5|LV39_HUMAN;sp|P80748|LV321_HUMAN	0	0	16676000	18222000	0	0	0	0	0	0	6308300	0	17174000	0	0	0	1834800	0	5461800	0	0	0	4336200	0	15036000	11391000	9316400
sp|O14638|ENPP3_HUMAN	0	0	0	11581000	37999000	0	5331000	7049600	5506200	8552600	4640300	7935500	0	0	0	0	0	0	0	0	0	0	0	0	0	5522600	8373000
sp|Q9H008|LHPP_HUMAN	0	0	0	14089000	3545900	2075700	36575000	3643600	5346500	6814500	0	4284300	2555600	0	0	0	0	0	0	0	0	0	0	6226100	0	0	0
sp|Q9BYW3|DB126_HUMAN	0	0	0	11411000	6439400	22523000	59484000	10194000	0	0	0	0	4370000	0	0	0	4599700	0	0	0	0	16079000	9943800	0	0	23595000	0
sp|Q9ULA0|DNPEP_HUMAN	0	0	0	0	0	3702000	100250000	77096000	3012700	0	2398600	4149100	2463100	0	0	0	0	0	0	0	0	0	0	0	2978200	7587000	2877100
sp|Q15904|VAS1_HUMAN	0	0	0	0	0	19538000	18767000	22971000	7954400	0	4881500	9098400	0	0	5610100	0	0	0	0	0	0	0	0	8924900	0	23118000	16063000
sp|Q96QH8|LYZL5_HUMAN	0	0	0	53644000	18240000	8119100	62543000	48301000	10840000	0	9418200	24957000	0	0	0	0	7881500	0	0	0	0	0	0	0	0	51659000	0
sp|Q9NQX5|NPDC1_HUMAN	0	0	7421200	16590000	0	11058000	0	13584000	15253000	0	9035800	25556000	17050000	12615000	0	0	8554800	0	0	0	0	0	0	0	0	0	0
sp|Q9H9H4|VP37B_HUMAN	0	2071100	0	0	0	0	0	1968900	9200400	0	3503400	0	0	16263000	0	0	0	0	2558300	2301600	1799000	0	0	0	0	5059200	3199600
sp|Q13508|NAR3_HUMAN	0	0	0	19194000	9299800	5941400	51111000	23335000	0	0	0	13623000	0	0	0	0	5980300	0	0	0	0	0	0	1763500	0	25008000	1653000
sp|O00231|PSD11_HUMAN	0	0	0	0	0	0	10128000	10472000	0	5401500	0	0	0	0	6871800	7911500	14282000	0	0	0	0	0	0	6122600	8325000	8612500	5630000
sp|Q96E40|SACA9_HUMAN	0	0	0	21516000	34527000	0	67203000	20446000	7445100	0	15116000	0	0	9277600	0	0	0	0	0	0	0	0	0	14297000	3688600	18108000	0
sp|P51665|PSMD7_HUMAN	0	0	0	0	23184000	33535000	0	12413000	0	13689000	0	16817000	0	0	0	0	0	0	2360500	4592500	2631700	0	0	0	8709100	8343700	0
sp|P35754|GLRX1_HUMAN	0	0	0	33590000	14549000	9650800	0	0	26438000	20979000	0	0	0	8725800	27818000	0	0	0	0	0	0	0	0	0	16339000	12977000	11248000
sp|P62942|FKB1A_HUMAN	0	0	0	38866000	0	413870000	0	19644000	0	0	0	41506000	0	9933300	3901400	10744000	26800000	0	0	0	0	0	0	212490000	0	20509000	0
sp|Q92526|TCPW_HUMAN	0	0	0	7360200	2341400	1413000	17386000	3379400	2999800	0	0	0	0	0	3514200	0	10675000	0	0	0	0	0	0	0	7224900	4633000	0
sp|Q1ZYL8|IZUM4_HUMAN	0	0	0	35221000	26432000	22762000	63499000	12199000	0	0	15893000	0	0	35753000	0	0	0	3678300	0	0	0	0	0	39319000	0	11775000	0
sp|O75131|CPNE3_HUMAN	0	0	0	0	19989000000	0	4040400000	1328600000	0	0	1930800000	4094500000	5261900000	0	0	0	0	0	0	1696400000	1232900000	0	0	847840000	0	0	4949900000
sp|P10619|PPGB_HUMAN	0	0	0	20321000	54839000	0	13096000	0	8910800	12937000	3004900	29291000	0	0	0	20735000	12356000	0	0	0	0	0	0	71337000	0	0	0
sp|P02675|FIBB_HUMAN;CON__P02676	0	0	576570000	0	15389000	0	71345000	5350800	0	9084700	0	2501200	0	0	0	0	0	32018000	0	0	0	0	0	0	2836900	9294500	3533000
sp|P0DJI9|SAA2_HUMAN;sp|P0DJI8|SAA1_HUMAN	0	0	0	0	0	532600	1991600	419170	25269000	0	4336500	0	0	0	0	8136400	36017000	2162000	0	0	0	0	2882200	0	6263800	0	0
sp|P19367|HXK1_HUMAN	0	0	0	3042900	6081500	0	19161000	5108400	6273400	0	6986100	5856000	0	0	5509700	0	0	0	0	0	0	0	0	10044000	0	16424000	0
sp|O00757|F16P2_HUMAN	0	13715000	0	11399000	4697600	0	0	0	7268200	0	16284000	4883400	0	0	0	0	0	0	0	0	2255600	5542200	12121000	0	0	21669000	0
sp|B3GLJ2|PATE3_HUMAN	0	0	0	10710000	0	13288000	34320000	10627000	0	0	15039000	12191000	0	7180700	0	0	6191900	0	0	0	0	0	0	7879300	0	17549000	0
sp|P36969|GPX4_HUMAN	0	0	0	0	32385000	0	57632000	47434000	0	0	4058100	9734900	0	0	0	0	0	0	8758900	6900000	31746000	6523700	0	0	0	48245000	0
sp|P20073|ANXA7_HUMAN	0	10679000	0	0	0	24837000	0	11368000	10397000	0	5603300	5650900	0	28176000	6723700	14933000	8608200	0	0	0	0	0	0	0	0	0	0
sp|Q08648|SG11B_HUMAN	0	14000000	0	0	0	0	17807000	60634000	15781000	10896000	2470100	0	0	0	0	0	88647000	0	0	0	0	0	0	58988000	8291500	17821000	0
sp|O75368|SH3L1_HUMAN	0	0	6574800	0	2246600	3144800	3699800	0	0	0	0	20950000	8787500	0	0	0	0	0	1930900	0	0	2485300	0	0	0	4366400	2258600
sp|P51815|ZN75D_HUMAN	0	0	0	194370000	101190000	0	0	0	116130000	0	67769000	0	208580000	42342000	45796000	112170000	45313000	0	0	0	0	0	0	39883000	0	0	27278000
sp|A3QJZ6|PRA22_HUMAN	0	0	0	545690000	561900000	384570000	595740000	349000000	0	0	0	325730000	0	1147300000	1124700000	1143700000	342230000	0	0	0	0	0	0	1892200000	0	0	0
sp|P99999|CYC_HUMAN;CON__P62894	0	0	10131000	0	0	11495000	52965000	59123000	0	0	0	0	0	0	0	0	19489000	2547500	2195300	1007300	3846200	1688900	0	0	0	22088000	0
sp|Q99828|CIB1_HUMAN	6845900	0	0	15263000	7615700	16417000	8633800	12265000	0	0	5336500	13576000	5319800	0	0	0	0	0	0	0	0	0	0	39370000	0	0	13427000
sp|P62191|PRS4_HUMAN	4266200000	0	0	0	0	3681300000	3253800000	0	2417600000	715040000	13331000	0	0	1409000000	1020000000	1710500000	0	0	0	0	0	0	0	776550000	0	3312400000	0
sp|Q8N387|MUC15_HUMAN	0	0	0	18140000	0	29303000	27218000	35811000	0	0	0	25864000	0	7503800	4270800	12290000	17126000	0	0	0	0	0	0	13007000	0	13498000	0
sp|O00629|IMA3_HUMAN	0	0	0	1494600	557920	703000	2810300	2901700	1298900	874780	0	604870	0	0	0	0	0	0	0	0	0	0	0	0	719010	1063600	547910
sp|Q15365|PCBP1_HUMAN	0	0	0	0	3551000	15572000	9789700	7070200	34691000	0	7695300	17513000	6904000	0	0	0	0	0	0	0	0	0	0	22472000	0	24555000	9220700
sp|Q15833|STXB2_HUMAN	0	0	0	10227000	5913900	5170500	5282000	5986300	6081800	4993400	5264600	0	0	0	0	0	0	0	0	0	0	0	0	0	6104500	8632100	5832600
sp|Q96FW1|OTUB1_HUMAN	0	0	0	17207000	6248500	27823000	5801500	12213000	12537000	0	0	0	0	18877000	0	10039000	0	0	0	0	0	0	0	12653000	13449000	0	8018900
sp|P16562|CRIS2_HUMAN	0	0	0	2740000	0	7567800	30759000	25150000	0	4537900	7798900	11631000	0	6944000	0	0	0	0	0	0	0	0	0	0	1479100	53847000	3998500
sp|Q6P4A8|PLBL1_HUMAN	0	0	0	7060700	7721700	4399300	8850200	5718400	0	0	3627800	7496600	0	0	0	0	3412600	0	0	0	0	0	0	0	5054500	5169900	5400700
sp|P20674|COX5A_HUMAN	0	0	0	29257000	16919000	18936000	332920000	153730000	9196000	10079000	3173300	8477200	0	0	0	0	0	0	0	0	0	0	0	0	0	123480000	4701700
sp|P35052|GPC1_HUMAN	0	0	0	0	7703400	28820000	16633000	13177000	10540000	0	11969000	13661000	14429000	0	0	22515000	4729900	0	0	0	0	0	0	0	0	11364000	0
sp|O94813|SLIT2_HUMAN	0	20434000	8906900	8105600	0	7964500	0	29710000	10087000	7912700	5344100	0	0	0	0	0	0	0	0	0	10969000	0	0	0	0	8312200	13120000
sp|P55083|MFAP4_HUMAN	0	0	0	18220000	32228000	15220000	46764000	0	12173000	5742500	8040700	0	0	8607000	0	0	22429000	0	0	0	0	0	0	21420000	0	0	11724000
sp|Q11201|SIA4A_HUMAN	3228600	19903000	0	0	0	0	9865600	0	11397000	21457000	0	6735100	5389900	0	0	0	10184000	0	0	0	0	0	0	0	6987300	7668000	5146200
sp|P08670|VIME_HUMAN	0	0	222160000	875060	0	0	10550000	0	0	0	0	0	0	2892800	688480	817550	510420	0	757560	0	0	0	0	823580	14809000	2100100	0
sp|Q9Y277|VDAC3_HUMAN	0	0	0	80284000	42689000	8700900	13659000	8934500	7053000	11903000	4597600	14858000	0	0	0	0	13811000	0	0	0	0	0	0	0	0	8438000	0
sp|Q99816|TS101_HUMAN	0	0	0	51079000	5846400	15287000	0	19011000	9571900	0	10697000	12478000	10285000	0	0	0	0	0	0	0	0	0	0	0	4850700	49145000	12878000
sp|P02671|FIBA_HUMAN	559030	1496200	197060000	0	0	0	9888100	0	0	803710	432300	0	1121200	0	0	0	0	23015000	0	0	0	0	277420	0	621400	1770900	0
sp|P02679|FIBG_HUMAN	0	0	274330000	791780	0	649780	12402000	3426200	0	0	466540	0	662910	0	1597400	0	157370	6465400	0	0	0	0	0	0	0	6187900	0
sp|Q7RTZ1|OVCH2_HUMAN	0	0	0	2705800	0	3047500	25571000	19037000	2821500	0	3460600	0	0	40019000	6332400	0	121680000	0	0	0	0	0	0	6194200	0	4536800	0
sp|Q01813|PFKAP_HUMAN	0	0	0	5367800	4961500	0	14937000	11906000	0	0	0	0	0	18547000	0	0	32896000	0	0	0	3799800	4326100	0	3649400	3615500	7604800	0
sp|O00754|MA2B1_HUMAN	0	0	0	67462000	0	14674000	7706900	24924000	6010800	0	3611500	0	0	19179000	0	0	2353300	0	0	0	0	0	0	0	2316500	13083000	4260800
sp|P11234|RALB_HUMAN	0	0	0	0	0	2361300	2826500	0	0	0	0	0	0	0	0	0	0	1835800	3625600	2868000	5624000	3589700	3940400	0	1596700	5746000	2507000
sp|Q5J5C9|DB121_HUMAN	0	0	0	0	68268000	10513000	37878000	69119000	0	23265000	0	39739000	0	40985000	8123700	0	112810000	0	0	0	0	0	0	0	7750600	5313200	0
sp|Q9Y5L3|ENTP2_HUMAN	0	0	0	11619000	1986700	4031600	2552200	5199200	0	0	3134700	4550900	6066400	0	0	0	0	0	2535500	2886500	2973400	0	0	0	0	0	0
sp|Q13126|MTAP_HUMAN	7610200	5312500	0	4780600	0	5724200	3787800	4055700	10764000	2258800	0	0	6807600	0	0	0	0	0	0	0	0	0	0	6014300	0	4126500	0
sp|Q96FE7|P3IP1_HUMAN	0	4301300	9857400	22019000	15511000	8162600	24790000	14151000	13990000	11812000	0	0	0	0	0	0	0	0	0	0	0	0	0	0	0	11800000	12491000
sp|O75340|PDCD6_HUMAN	4512600	0	3176500	0	16917000	0	0	11025000	5454800	0	0	6330700	6416400	0	0	0	0	0	4955200	7758700	5527600	5440100	0	0	0	0	0
sp|Q5VYK3|ECM29_HUMAN	0	0	0	30566000	0	3766600	6155200	11450000	0	36284000	0	6294700	6147500	746650000	64940000	863990000	0	0	0	0	0	0	0	0	0	10506000	11753000
sp|Q9Y2V2|CHSP1_HUMAN	0	0	0	5915800	0	9217200	11023000	8617600	3925600	7629200	0	6192700	5820900	0	0	0	4551200	0	0	0	0	0	0	0	8236000	8533100	8910400
sp|P62333|PRS10_HUMAN	6714900	16038000	0	0	0	0	28520000	0	20025000	7711200	10267000	0	0	16557000	10256000	15510000	19016000	0	0	0	0	0	0	0	13622000	15323000	0
sp|P46782|RS5_HUMAN	0	0	7522300	0	0	0	21942000	17671000	14604000	4928700	5721800	7561200	0	10774000	14198000	0	0	12202000	0	4000200	10642000	0	0	0	0	0	0
sp|Q15181|IPYR_HUMAN	0	0	5999500	0	0	5102500	0	0	9606700	22533000	0	0	0	0	0	0	8479800	6142700	6601800	0	4495500	0	8933900	0	39278000	17015000	17497000
sp|P0DP01|HV108_HUMAN;sp|P01743|HV146_HUMAN;sp|P01742|HV169_HUMAN;sp|A0A0C4DH29|HV103_HUMAN;sp|A0A0B4J2H0|HV69D_HUMAN	0	0	9609400	0	0	2006400	11637000	0	0	0	6098000	0	5484600	0	0	0	0	2878200	6262200	1724100	4317700	0	0	0	3672400	10002000	3732300
sp|Q96RQ9|OXLA_HUMAN	0	0	0	11693000	4608300	3348700	7676000	9610000	8446500	22500000	2472100	0	0	0	0	0	0	0	0	0	0	0	0	8619900	9722200	9267000	18449000
sp|O76054|S14L2_HUMAN;sp|Q9UDX4|S14L3_HUMAN	5524700	2775900	0	20539000	22952000	0	0	30673000	13838000	0	2954200	0	0	0	0	4746100	8632600	0	0	0	0	0	0	0	6361300	7788400	4864000
sp|P62829|RL23_HUMAN	0	0	0	0	0	0	7887500	0	9436600	0	3236300	7047400	4758900	17546000	12918000	16216000	15287000	0	0	0	0	0	0	13784000	6740500	14290000	0
sp|Q92485|ASM3B_HUMAN	0	0	13321000	10512000	0	12059000	23903000	0	0	0	8614300	0	0	0	0	0	0	6872300	9938300	9551500	10388000	6320800	9093000	0	0	12767000	0
sp|P60903|S10AA_HUMAN	0	8530800	0	53103000	0	0	14802000	8711500	0	0	0	11535000	14975000	14966000	9343500	14188000	11891000	0	0	0	0	9637300	11275000	0	0	0	0
sp|P50897|PPT1_HUMAN	0	0	0	17742000	0	8263900	4859400	19406000	12420000	14109000	3430100	7658900	0	0	0	0	10909000	0	0	0	0	0	0	0	11538000	4004800	9718700
sp|P30040|ERP29_HUMAN	0	0	5534100	3279100	0	2620500	0	14986000	2207000	5216000	0	8214600	3829300	0	0	0	0	0	2066500	0	0	1439800	0	0	7677100	13282000	0
sp|Q92597|NDRG1_HUMAN	5200000	0	0	9830400	0	5472800	0	6562600	0	0	11803000	12087000	0	0	0	0	5844200	0	0	8471400	7326400	5956900	7813100	0	0	10244000	0
sp|P61970|NTF2_HUMAN	0	0	0	44974000	41597000	53700000	19285000	0	12223000	0	0	44592000	0	24047000	0	25903000	28686000	0	0	7476200	0	0	0	29940000	0	32006000	0
sp|Q8IUA0|WFDC8_HUMAN	0	0	0	21432000	19403000	18217000	41536000	8546100	0	0	10626000	8041900	0	0	3277500	8361500	9822600	0	0	0	0	0	0	8480600	0	21697000	0
sp|P01624|KV315_HUMAN;sp|A0A087WSY6|KVD15_HUMAN;sp|A0A075B6H7|KV37_HUMAN;sp|A0A0C4DH55|KVD07_HUMAN	0	0	3327800	0	0	9921000	68874000	0	0	5241600	0	0	31956000	4809000	3155200	0	3719300	0	0	0	11397000	4009100	0	0	0	60022000	18323000
sp|Q8NBZ7|UXS1_HUMAN	0	0	12723000	11063000	10067000	11522000	7269900	9919000	0	27891000	9999500	12407000	15481000	0	0	0	0	12946000	0	0	0	0	0	0	0	11196000	0
sp|Q15293|RCN1_HUMAN	0	14137000	0	15075000	0	19511000	16311000	10187000	0	0	8844300	11884000	14828000	0	7037100	0	9360400	0	0	0	0	0	0	12784000	0	0	5725200
sp|P22612|KAPCG_HUMAN	0	0	12679000	5182700	0	7213200	0	45863000	29252000	0	13874000	0	0	0	4025600	0	0	16086000	14486000	0	14811000	8801900	0	0	0	17017000	0
sp|P09382|LEG1_HUMAN	0	5632900	43935000	104560000	0	0	10405000	14980000	8087400	0	6874200	8814200	8087200	0	34353000	0	0	0	0	0	0	6543100	0	0	31836000	0	0
sp|Q9Y285|SYFA_HUMAN	0	0	1944100	0	0	1749300	0	6495400	6840100	4678200	0	0	0	0	0	3535300	5991400	5290000	0	2125300	0	0	0	0	3967300	6168600	5036900
sp|Q8N6G6|ATL1_HUMAN	0	0	0	5813100	0	0	5982300	4945600	0	0	7048900	0	0	2429600	1749100	0	3304200	0	0	2087700	4680900	2530400	2864700	5332500	0	0	0
sp|Q9H3U7|SMOC2_HUMAN	0	0	6592600	15099000	7579700	8885800	8349700	10374000	0	6312000	0	12721000	0	0	0	0	0	0	0	3107800	0	4883800	3941800	0	0	11735000	0
sp|Q9Y217|MTMR6_HUMAN	0	0	0	0	58211000	66032000	88464000	86884000	0	53054000	31646000	0	50610000	0	73879000	17274000	23182000	0	0	0	0	0	0	19440000	0	51191000	94022000
sp|Q8N122|RPTOR_HUMAN	0	0	0	0	442010000	5436800	12715000	17941000	11683000	0	9953000	0	0	53447000	10607000	10160000	11682000	0	0	0	0	0	0	1293800	2597000	0	1238700
sp|O60240|PLIN1_HUMAN	0	0	0	3276500	0	2167100	2940500	3968100	0	0	3730500	0	3775100	5982600	15792000	13976000	6784700	0	0	0	0	0	0	0	5192600	74160000	3434900
sp|P18206|VINC_HUMAN	3040000	0	0	0	2284100	3646400	0	2421900	2798700	0	1402200	2567400	4364500	0	0	0	0	0	0	865440	805800	0	0	0	5341300	2316900	1559600
sp|O60884|DNJA2_HUMAN	0	0	0	7264900	5551700	5126700	0	10212000	5955600	0	4116300	7227800	6675300	0	0	0	0	0	0	0	4714300	3707800	3118000	0	4984800	6503000	0
sp|K7EJ46|SIM22_HUMAN	4200000	0	3523900	0	0	7839700	11607000	3964500	7267600	10375000	2980100	0	0	2237700	1109600	0	0	0	0	0	0	0	0	0	4059900	4592100	7202500
sp|Q9NZD2|GLTP_HUMAN	0	0	0	36665000	14293000	17924000	30266000	0	10937000	13382000	5634700	8355700	7731300	0	0	0	5743300	0	0	0	0	0	0	10501000	7381900	14190000	0
sp|Q8TF09|DLRB2_HUMAN;sp|Q9NP97|DLRB1_HUMAN	0	0	0	21201000	79956000	10653000	16423000	14604000	12896000	0	19540000	29090000	0	0	0	22181000	0	0	0	0	0	6380000	0	13244000	7367400	14050000	0
sp|P20618|PSB1_HUMAN	0	10529000	0	2681100	1473700	3764000	13145000	9103000	0	0	3666100	0	0	0	0	0	0	34703000	31146000	0	72274000	0	0	0	2386300	6485300	2761300
sp|Q9UQ80|PA2G4_HUMAN	0	0	0	5131300	5120100	5057100	13407000	10464000	0	0	4301100	0	6192800	0	1888200	4053200	8058000	0	0	0	0	0	0	0	5777400	6354900	3720800
sp|P49720|PSB3_HUMAN	0	9205200	0	0	0	17759000	38318000	0	13017000	19659000	13112000	19838000	0	41561000	0	36646000	9219200	0	0	0	0	0	0	18942000	6514600	52345000	0
sp|O00253|AGRP_HUMAN	0	0	0	68544000	125250000	56092000	2020900	2782800	0	0	5633200	12385000	0	3436900	0	8000800	8861100	0	0	0	0	0	0	5708700	5039500	12727000	0
sp|Q9BZX4|ROP1B_HUMAN	0	0	0	28639000	4988600	4159100	47506000	10863000	5332600	0	2807800	0	0	13963000	0	0	1315200	0	12629000	0	0	0	0	24127000	2754000	9195300	0
sp|P37837|TALDO_HUMAN	6512600	0	0	51842000	22106000	25732000	119940000	21362000	14327000	0	9141400	14635000	0	0	15852000	0	30250000	0	0	0	0	0	0	0	40422000	52394000	0
sp|Q9HBV2|SACA1_HUMAN	0	0	7503000	47931000	23017000	10035000	49978000	55986000	3466500	0	20701000	0	0	7933800	0	5382400	8532800	0	0	0	0	0	0	12774000	0	30971000	0
sp|P35442|TSP2_HUMAN	0	0	7437400	30439000	14557000	0	20182000	11862000	14124000	69797000	0	0	0	0	0	21500000	19221000	0	0	0	12052000	10440000	0	16357000	0	0	13078000
sp|Q8IXA5|SACA3_HUMAN	0	0	0	56097000	66471000	28301000	150810000	82830000	19848000	0	19929000	26236000	6242100	11688000	0	0	23483000	0	0	0	0	0	0	55139000	0	30543000	0
sp|P53801|PTTG_HUMAN	3761600	0	19032000	12431000	0	2919100	2933800	9289300	7479600	0	0	6291500	0	0	3131600	0	0	0	5469300	0	0	0	0	0	8077900	11795000	7708700
sp|P38606|VATA_HUMAN	8132800	0	20486000	3861400	4645900	5335400	6069200	13303000	0	0	0	0	6885000	0	0	0	0	4369700	0	5953900	5804600	5745600	7703400	0	0	0	0
sp|Q96DG6|CMBL_HUMAN	0	2291100	0	7996400	7916700	5013500	0	6941600	14362000	0	0	6166300	4403400	0	0	0	0	0	3031500	5475100	4732400	4395700	4869800	0	0	0	0
sp|Q9BV36|MELPH_HUMAN	3193800	0	9407400	12760000	0	6778600	0	13351000	0	0	4616700	0	6185500	0	0	0	0	0	0	7221800	3031400	4979500	3912700	0	0	10176000	5788100
sp|Q8WWA0|ITLN1_HUMAN	0	0	124430000	16079000	1173500	0	0	2070400	0	426220	0	1507800	0	73112000	0	0	0	925010	421670000	0	999560	392550	0	73868000	0	0	143160000
sp|P69905|HBA_HUMAN;CON__P01966	0	0	318120000	0	0	0	961050	0	1041500	0	15516000	29336000	115750000	0	0	0	0	1694200	1167800	663330	908670	0	575840	0	2284100	1959500	0
sp|Q8IZ41|RASEF_HUMAN	6869800	0	0	2106400000	0	973310000	769510000	562480000	642940000	0	605260000	426220000	1132300000	102770000	452940000	0	1856200000	0	0	0	0	0	0	0	0	837360000	0
sp|Q6ZU64|CFA65_HUMAN	0	0	0	33162000	23855000	98309000	43977000	63987000	63805000	28187000	0	113720000	0	75957000	0	0	0	0	0	0	0	0	3830700	0	541610000	96822000	101230000
sp|Q13586|STIM1_HUMAN	0	0	0	90674000	123960000	38988000	51235000	47757000	0	0	0	41322000	55523000	43840000	29284000	46684000	22709000	0	0	0	0	0	0	0	20675000	44699000	43776000
sp|P62837|UB2D2_HUMAN;sp|P61077|UB2D3_HUMAN	0	0	0	27113000	6277400	7634100	18036000	4962800	8263300	7487800	2702700	7020000	6480100	0	0	0	0	0	0	0	0	0	0	3187400	11249000	10588000	5603500
sp|P61586|RHOA_HUMAN	4659200	0	0	8659100	5663700	7250400	11062000	10121000	10510000	4777400	5514400	5956100	12353000	0	0	0	0	0	0	0	0	0	0	0	17119000	6889200	5980600
sp|P15531|NDKA_HUMAN	0	0	0	10279000	0	0	10828000	0	0	0	7274600	6175100	0	2648100	2645600	0	4719400	7645500	4725500	4620900	7925700	5110700	5117700	2610800	0	0	0
sp|P54725|RD23A_HUMAN	0	4310800	0	0	50145000	18894000	6103600	6178600	13697000	8815600	0	9160200	6852800	0	0	0	0	0	2195800	2841000	0	0	0	3424300	13949000	11237000	0
sp|Q9Y696|CLIC4_HUMAN	0	0	0	6601600	67290000	12353000	23812000	3127800	7830100	9054700	2350300	14649000	0	0	0	4350200	0	0	0	0	0	0	7394500	0	7909700	17280000	6337500
sp|Q9P1F3|ABRAL_HUMAN	2366600	1847400	0	9560000	0	3984400	8015500	1962000	6130400	0	3723300	0	5160300	5142200	9719600	0	0	0	0	0	0	0	1987800	0	3487800	8072000	0
sp|Q9H299|SH3L3_HUMAN	0	0	0	17262000	5672800	5082700	10998000	5865800	0	6457300	5277200	3874800	0	0	0	0	0	2169300	0	0	4957500	6302600	7688300	0	25537000	11907000	0
sp|P28074|PSB5_HUMAN	0	0	0	31129000	9399800	5720800	17258000	18057000	2682400	0	7973600	11396000	8012000	7173500	0	3750400	9911000	0	0	0	0	0	0	0	10741000	10019000	0
sp|Q9NR45|SIAS_HUMAN	13865000	0	19934000	71570000	36218000	69128000	4777000	3466500	6393500	0	17112000	44260000	43059000	0	0	0	0	0	12719000	30509000	0	28378000	0	0	0	0	0
sp|P09960|LKHA4_HUMAN	0	0	2347400	8209600	5278200	1389300	10336000	2942200	1976600	0	0	1367100	0	2007800	0	2094700	3438500	0	0	0	0	0	0	0	3688400	2676500	1512300
sp|Q8IZJ3|CPMD8_HUMAN	6464400	5972200	0	19004000	5021500	5378400	18168000	8190900	8143900	0	3620300	4287800	5529300	0	0	0	0	0	0	0	0	0	0	19657000	0	13719000	8756800
sp|P53990|IST1_HUMAN	0	3935500	0	3715400	0	4256100	3329400	4646500	8733400	0	5680400	6553600	4864800	0	0	0	0	0	0	0	3742800	3972300	0	0	2928500	3803900	3437600
sp|P01130|LDLR_HUMAN	0	0	0	44474000	5337700	8632800	12706000	12372000	13411000	0	15767000	10453000	3391100	15323000	9553200	0	0	0	0	11089000	0	0	0	0	0	15959000	7384100
sp|Q96QE4|LR37B_HUMAN	0	0	9140900	10522000	6663500	7426300	103260000	55537000	0	0	13996000	10380000	0	9196700	0	3528500	7173800	6183300	0	0	0	0	0	8373000	0	28841000	0
sp|P05386|RLA1_HUMAN	0	0	0	123330000	0	20212000	38545000	32178000	37041000	36876000	17427000	28497000	39319000	11941000	0	0	163070000	0	0	0	0	0	0	0	70319000	45589000	15332000
sp|P13667|PDIA4_HUMAN	0	0	0	3763600	0	4243200	22700000	49899000	0	3221700	3390100	7746000	0	5167500	2614500	3202600	64455000	0	0	0	0	0	0	5202800	0	6148900	4315200
sp|P19835|CEL_HUMAN	3048500	13648000	0	8637100	0	24612000	20265000	12268000	0	0	10038000	6994300	0	16540000	0	0	27826000	0	8015000	0	0	0	18803000	27497000	0	42363000	0
sp|O75608|LYPA1_HUMAN	2188500	4148900	0	31793000	2841500	3906900	5273200	22366000	10232000	0	0	0	0	0	0	0	0	4110400	0	1760300	5466500	0	0	0	607510	866120	3510200
sp|Q2TAA2|IAH1_HUMAN	0	0	0	7608700	6732300	0	9258000	7198400	0	0	0	19440000	19173000	5315200	3899700	0	0	2790100	3970600	4741200	4134700	4681000	0	7568700	0	0	0
sp|Q9NQW7|XPP1_HUMAN	0	13562000	0	8016500	7895600	5765100	10671000	7962000	6491200	4645000	0	6992200	6963400	0	0	0	0	0	0	0	0	0	0	36546000	4520200	6755400	5600600
sp|Q92956|TNR14_HUMAN	0	0	7311700	18764000	0	6327100	4438200	11194000	0	12103000	8019800	10224000	15826000	0	0	0	0	0	0	2936600	5214100	3754300	0	0	0	6712000	4428900
sp|Q13093|PAFA_HUMAN	0	0	0	38375000	5817400	17774000	10248000	13204000	26011000	8055500	4660500	0	0	0	7206900	3475600	0	0	0	0	0	0	0	17286000	8406100	46136000	8646000
sp|P19021|AMD_HUMAN	0	0	0	21648000	18826000	20146000	18911000	22881000	13133000	0	9677600	16010000	12618000	27938000	0	28250000	0	0	0	0	0	0	0	0	9919900	25904000	7717900
sp|P19075|TSN8_HUMAN	572850000	0	0	50303000	122550000	30109000	32141000	42327000	65302000	0	24654000	33957000	34013000	0	17235000	0	40745000	0	0	0	0	0	0	41155000	0	0	27283000
sp|Q01638|ILRL1_HUMAN	0	14412000	0	0	0	0	0	6585600	17321000	30636000	15275000	44717000	0	16826000	0	5996500	25315000	0	25162000	0	4474700	0	0	49981000	11030000	25701000	0
sp|Q96HR9|REEP6_HUMAN	4685400	0	0	3884100	11975000	1757100	13049000	12748000	6207400	3134300	0	2289700	0	0	0	5300500	23100000	0	0	0	10842000	3853500	0	0	0	13213000	0
sp|P13798|ACPH_HUMAN	2696800	4289900	0	8811700	8430100	4948100	8095600	6864600	0	0	6157700	0	0	0	0	0	0	4381000	3398100	4414500	4807700	6440700	12702000	0	0	0	0
sp|Q9NTK5|OLA1_HUMAN	3764900	6173200	910070	4787100	4186500	4427200	3616200	3647400	0	0	0	5356000	0	0	9321800	0	0	0	3527000	5158000	4547300	4369500	4331300	0	0	0	0
sp|P17980|PRS6A_HUMAN	0	0	6596800	22868000	10926000	11063000	18442000	10008000	10926000	0	8698300	9700000	0	0	0	2139800	0	9092400	0	3646100	7007100	0	0	0	6532900	10062000	0
sp|O43505|B4GA1_HUMAN	0	23070000	0	37917000	19299000	21823000	23731000	22431000	17124000	28259000	6125500	28590000	0	0	17929000	7863700	0	0	0	0	0	0	0	0	13584000	34660000	13375000
sp|P10768|ESTD_HUMAN	3488300	0	0	22452000	17742000	10742000	25477000	24956000	11526000	0	15164000	22058000	0	13353000	15336000	0	24810000	0	0	0	0	0	0	9902000	9781000	0	11547000
sp|P63208|SKP1_HUMAN	0	0	0	3091300	1676000	0	7100600	2464500	2168800	1746600	807610	2165900	1821200	412920	0	0	754480	0	0	0	0	0	0	1483300	1539600	1681000	1055600
sp|P35443|TSP4_HUMAN	0	12044000	0	9363600	2199100	6275900	6053000	14031000	0	0	2396900	5462700	13421000	424330	0	10590000	5569800	5043000	4626400	5782300	0	0	0	0	0	0	0
sp|Q9UBQ7|GRHPR_HUMAN	0	0	0	27131000	25501000	0	32458000	29561000	33459000	25972000	15249000	26251000	24043000	11566000	0	0	35664000	0	0	0	0	0	0	2862800	10831000	24899000	15830000
sp|P22304|IDS_HUMAN	5990100	9664100	9831000	21844000	20262000	15399000	13127000	15308000	0	119380000	18394000	40416000	26769000	0	0	0	0	16444000	0	0	0	0	0	29173000	0	40094000	0
sp|P62328|TYB4_HUMAN	10939000	0	15839000	11524000	7014100	9240000	103860000	9362900	0	0	3170700	5437100	0	0	2499700	0	4130400	0	0	0	0	0	0	4561400	83939000	7741500	13634000
sp|P51888|PRELP_HUMAN	0	4928300	12213000	40625000	196380000	5536200	16023000	0	0	387650000	5724100	6197400	0	0	0	0	0	0	9469600	23503000	811720	0	0	0	2200800	4059100	23424000
sp|Q5T871|LELP1_HUMAN	0	0	5463700	16459000	10904000	6042100	38326000	34006000	0	0	0	9226800	0	3737700	0	4462300	10032000	10710000	2839400	0	6233200	0	0	5080600	0	61816000	0
sp|P43686|PRS6B_HUMAN	0	0	0	30980000	13142000	9019300	22561000	18474000	15599000	10180000	4023500	7982800	0	3832800	2889500	0	15891000	0	0	0	0	0	0	0	10669000	12498000	5564000
sp|P62195|PRS8_HUMAN	0	0	2106000	19790000	10474000	24775000	6503900	10548000	9418000	0	2714600	3031200	0	0	0	0	4599700	7902300	3649000	0	4957800	0	0	0	12515000	13787000	0
sp|P24855|DNAS1_HUMAN	0	0	0	95310000	0	2153400	6540900	21050000	26985000	17132000	12094000	14130000	0	34315000	28620000	0	19896000	0	0	18419000	0	0	0	17127000	13458000	21358000	0
sp|P34931|HS71L_HUMAN	0	0	0	45722000	13310000	10246000	234010000	33305000	13175000	0	0	10336000	0	24019000	0	52050000	47759000	19533000	7415200	0	0	0	0	21821000	9598900	39883000	0
sp|Q6UW49|SPESP_HUMAN	55644000	0	0	83280000	47115000	15562000	156890000	21661000	7587600	13983000	5225000	14240000	0	0	0	0	0	0	0	3946500	0	0	4120400	41825000	0	43470000	2443300
sp|P34932|HSP74_HUMAN	0	0	0	0	0	3497600	27781000	20421000	7211100	0	6497200	11802000	7217900	5884600	12109000	5047900	20121000	0	0	0	0	8720900	0	0	9152400	13847000	6525400
sp|P08174|DAF_HUMAN	0	0	0	58685000	103450000	11960000	44127000	25044000	10811000	0	0	23884000	12338000	4020300	3809100	7735200	0	0	0	0	0	0	0	27757000	7822100	19015000	4859600
sp|P05109|S10A8_HUMAN	0	0	117120000	0	0	3680600	599930000	4540900	0	0	14461000	0	27410000	0	8496700	0	9468600	4995100	1234200	4112600	0	0	0	10252000	232580000	107790000	2187200
sp|P10644|KAP0_HUMAN	0	35350000	0	0	37332000	10797000	51638000	49671000	26496000	45752000	25302000	19125000	0	29375000	22100000	0	25396000	0	0	0	0	0	0	21978000	19799000	27692000	0
sp|P49223|SPIT3_HUMAN	0	0	14090000	150070000	96622000	20066000	358780000	23868000	0	9129700	103180000	38542000	0	38843000	20044000	36420000	101960000	0	0	0	0	0	0	186380000	0	51356000	0
sp|P18085|ARF4_HUMAN	0	0	7083500	0	40341000	0	5863900	8288800	10143000	0	3865200	5217800	0	0	0	0	0	7394000	10441000	10825000	10179000	12365000	9727800	0	4728200	6998100	0
sp|Q15366|PCBP2_HUMAN;sp|P57721|PCBP3_HUMAN	0	0	4091300	0	3551600	8108900	4675900	12415000	7541500	7716500	0	0	0	0	0	0	0	4490400	3793900	3741700	6108800	4910300	5994600	0	6384500	10372000	0
sp|O00592|PODXL_HUMAN	3781100	9219900	16223000	24908000	0	0	8734800	10034000	0	0	4391900	0	0	0	0	0	3957300	5319700	7381000	3760800	3037200	3168800	2223700	0	10474000	0	0
sp|Q9UBI6|GBG12_HUMAN	5488800	0	0	0	0	5915800	4556800	8965500	3306500	0	4309300	6084600	0	0	0	0	0	5042400	7698200	6380100	13054000	5084300	7903400	0	0	15567000	4380000
sp|P31948|STIP1_HUMAN	0	0	0	12857000	12014000	12199000	8137100	25098000	14522000	0	6735900	15068000	0	16180000	10318000	10531000	20286000	7753500	0	0	0	0	0	0	9002400	19711000	0
sp|P25705|ATPA_HUMAN	0	0	8666900	20928000	6979400	7356200	30102000	30992000	22814000	0	11669000	25732000	0	0	0	0	37065000	40329000	0	0	0	0	0	14858000	16810000	106710000	5627600
sp|P55327|TPD52_HUMAN	0	0	0	17087000	38658000	19401000	25889000	0	9133400	18454000	3306200	44270000	45548000	10690000	0	18187000	9841100	0	0	0	0	3328400	0	21554000	5854700	0	0
sp|P05387|RLA2_HUMAN	12642000	6849600	0	38583000	0	21932000	42206000	45434000	887440	0	3884400	9634700	0	50841000	9383400	51890000	104720000	0	0	0	0	0	0	0	6130700	13659000	0
sp|P47897|SYQ_HUMAN	0	0	0	2324600	2471600	1203100	3053300	2893300	3263100	1482100	1357100	0	2682100	0	0	1965700	1427700	0	0	0	0	0	0	3673300	2305000	1762000	1215100
sp|P0C8F1|PATE4_HUMAN	90404000	0	0	0	0	0	157130000	0	0	0	99838000	241870000	76016000	255360000	247000000	312110000	121960000	139600000	41643000	59161000	114400000	0	22820000	73734000	0	0	0
sp|Q9NP79|VTA1_HUMAN	4766300	6242200	7801600	11178000	6459000	6483800	0	10219000	0	0	12442000	11612000	0	0	3928300	0	4394500	2072900	0	10641000	10229000	0	0	4855700	0	0	0
sp|Q9P2K2|TXD16_HUMAN	0	0	5032800	19946000	3161400	8955800	18249000	0	11903000	7199400	0	0	0	0	0	3198400	0	0	16515000	7520100	8338800	4965400	0	0	2634800	16908000	6682400
sp|O00410|IPO5_HUMAN;sp|O60518|RNBP6_HUMAN	0	0	0	0	24479000	5815100	26732000	17481000	9537700	11765000	2326400	15511000	5218900	10253000	3804000	0	75411000	0	0	0	0	0	0	11934000	22736000	10670000	0
sp|P14314|GLU2B_HUMAN	5939000	0	0	0	0	6649700	24182000	23324000	17049000	0	6395300	13391000	0	5705800	4306200	6440800	0	0	0	0	0	0	617840	26230000	5450500	18780000	7180400
sp|Q9Y5K6|CD2AP_HUMAN	0	0	0	21977000	3955200	15706000	7466700	2528900	5654400	11007000	1888300	21068000	8301800	19904000	0	6567000	4481800	0	0	0	0	0	0	0	6782700	3528400	9739100
sp|Q6ZVM7|TM1L2_HUMAN	0	0	0	6206800	1463800	2154800	1702300	3408100	6216500	2689200	1345300	1966700	2472700	0	3647400	0	0	0	0	0	3047300	0	0	1500600	2691600	2817000	2611600
sp|Q14914|PTGR1_HUMAN	0	0	10772000	14375000	32213000	34712000	28237000	60002000	14078000	0	5857100	0	0	0	0	0	0	4917600	4763000	3340900	12471000	10248000	8427100	20798000	0	30424000	0
sp|Q6ZWJ8|KCP_HUMAN	4464700	4046700	3260200	23709000	11667000	7332700	8223200	5017100	0	0	8819500	19189000	0	0	0	0	2009400	0	2993500	4993500	2387600	0	0	0	0	11823000	4718900
sp|Q99436|PSB7_HUMAN	0	0	0	14146000	7925300	6044800	24385000	7510300	7990700	0	7738100	7422400	5021100	0	0	0	9808700	0	6354900	7472100	16338000	0	10091000	0	6157800	20950000	0
sp|P00734|THRB_HUMAN	0	0	86712000	21977000	20658000	0	30158000	8751200	0	23409000	5187500	8557600	7685600	0	8179100	0	7560300	0	6807200	0	7759700	0	0	43105000	0	20424000	13344000
sp|P36955|PEDF_HUMAN;CON__Q95121	29067000	15000000	0	7176200	4201600	5733800	12944000	23356000	7182600	23496000	3098700	6392100	0	0	0	0	0	0	0	0	0	8070000	11868000	0	10685000	15821000	13214000
sp|P08865|RSSA_HUMAN	0	0	8199900	3596400	1736300	0	2232900	0	0	3254700	2569200	0	2417100	0	0	0	11192000	7343300	6797200	0	14581000	7528200	7282200	26533000	6428000	2624800	0
sp|P00568|KAD1_HUMAN	0	0	0	24958000	9197200	20254000	134370000	26035000	6702200	11596000	5175100	8666800	0	3434500	0	0	0	0	0	0	10331000	0	5381600	96800000	7518600	18326000	2257800
sp|Q04837|SSBP_HUMAN	0	3571500	4458000	12898000	6355200	17308000	66658000	44017000	0	0	5093300	10621000	0	0	0	0	5000700	8310100	1992300	0	2638700	1015800	507840	0	0	36736000	0
sp|P51688|SPHM_HUMAN	0	17125000	0	53449000	22799000	15805000	15483000	36057000	25304000	28735000	8960400	20099000	18712000	0	0	0	14792000	0	0	0	0	0	0	14693000	10644000	14917000	13922000
sp|Q92530|PSMF1_HUMAN	2129300	0	0	6550700	5454300	3523700	7591000	6441500	8393100	2786200	0	5039500	6486800	3697100	1262300	0	6394800	0	0	0	0	0	0	2514300	0	4959400	3415000
sp|P68032|ACTC_HUMAN;sp|P63267|ACTH_HUMAN;sp|P68133|ACTS_HUMAN;sp|P62736|ACTA_HUMAN	0	0	29481000	47213000	48324000	72810000	93987000	0	7382300	0	86557000	35573000	0	55855000	28703000	32722000	0	9098000	7666700	0	0	14641000	0	0	18855000	26974000	0
sp|P06702|S10A9_HUMAN	2026900	0	60405000	1266800	8790100	2150000	1119700000	0	0	0	0	9135500	735900	8331700	10094000	6382300	0	8560300	0	0	0	0	0	34236000	178700000	36609000	834160
sp|O95757|HS74L_HUMAN	0	0	0	2661900	2554800	0	17121000	12554000	1884800	2243900	897720	4165600	1933200	4592300	3488900	4805500	130020000	0	0	0	0	0	0	5891700	1109200	1470700	0
sp|O43581|SYT7_HUMAN	6369000	4442200	0	13376000	531300	9202400	8480900	11350000	7015600	0	9730700	12517000	0	0	0	0	0	10287000	0	14041000	13135000	0	13933000	3406000	0	12565000	0
sp|O00232|PSD12_HUMAN	4674800	3684300	1688500	11379000	2849200	3159700	16848000	19516000	0	0	2148700	0	9745400	12109000	0	0	29864000	2129200	0	1869400	4110900	0	0	5430800	0	0	0
sp|P07437|TBB5_HUMAN	0	0	22496000	21598000	0	9736100	5395800	30990000	7333100	0	0	0	0	0	10316000	0	11558000	7339700	7154800	6047800	9502800	6192600	10299000	0	14483000	9629200	0
sp|O14657|TOR1B_HUMAN	0	8472500	4104500	39262000	0	2347400	0	5630600	4967800	23922000	0	5272300	0	4976700	0	0	19077000	5118300	4287400	0	5975700	0	0	6479300	5163800	6852500	0
sp|P36959|GMPR1_HUMAN	2748800	0	0	18678000	12469000	3845900	3267800	0	12719000	10744000	8541700	5836800	0	4458500	7614500	0	3381700	0	0	0	0	3338800	9869600	0	4416300	5404400	0
sp|P36871|PGM1_HUMAN	4312600	8240300	0	11471000	6064000	6033900	8546800	8083400	10972000	4334800	3681700	0	0	0	0	0	0	0	0	0	8259300	5462200	0	6367700	5340700	6094500	4694300
sp|P29692|EF1D_HUMAN	0	0	13121000	10645000	17148000	0	16233000	24264000	0	0	0	25697000	7553900	4248600	0	3453500	13705000	8570100	0	0	4118000	3774800	0	23510000	10645000	23527000	0
sp|P01137|TGFB1_HUMAN	7353500	9097600	8238800	14102000	10068000	11344000	20615000	13001000	0	0	7150000	14239000	0	0	0	6508900	9982700	5711200	0	3949100	0	7815000	6657000	0	0	0	0
sp|Q6UY27|PATE2_HUMAN	0	0	9899500	49099000	0	50543000	28630000	0	6022100	0	28611000	18996000	0	11021000	0	49369000	18840000	13405000	6756300	6239800	0	0	0	0	3085600	14797000	5804600
sp|P04433|KV311_HUMAN;sp|A0A0A0MRZ8|KVD11_HUMAN	0	0	40200000	8934000	0	13830000	27815000	4350800	5303800	0	3946800	6616900	8861200	0	0	0	0	0	8548100	6451800	4814600	0	9189200	0	13820000	29257000	3877000
sp|Q12907|LMAN2_HUMAN	2671400	0	5726400	8802700	0	5260200	19198000	9956400	5017200	0	3781100	9066700	0	0	0	0	84222000	0	0	0	0	4813000	4332000	6674100	6279900	21804000	4439000
sp|Q9H1M4|DB127_HUMAN	11252000	0	16883000	43741000	13446000	0	75085000	27392000	0	8953200	3640200	40891000	0	0	0	0	11960000	3288900	7389700	2496500	0	5337300	0	8406600	0	42748000	0
sp|Q9UKJ8|ADA21_HUMAN	0	0	0	2119400000	987310000	1920800000	546340000	1245100000	1020700000	1244000000	58993000	335230000	713730000	118180000	1511200000	0	160370000	0	0	0	0	0	0	68351000	1272600000	1428500000	1190200000
sp|Q96EP5|DAZP1_HUMAN	0	0	0	9583000	8747200	8961400	11618000	14869000	0	7467400	3751800	9422600	11429000	2908900	4375200	0	7551400	3169200	0	0	0	0	0	2643300	7987300	14150000	8127800
sp|Q03167|TGBR3_HUMAN	0	0	0	0	36154000	125660000	913390	25811000	6913200	11624000	4791300	4439200	18083000	7685700	23690000	35164000	3971000	0	0	0	0	0	0	6168600	2729400	29191000	7467800
sp|P00966|ASSY_HUMAN	11313000	0	0	4696000	8848700	4907300	4702300	6704800	0	0	0	5408200	17089000	7414500	0	0	698860	0	1910100	1846200	5034100	0	3853600	16331000	6499400	0	2548900
sp|Q13200|PSMD2_HUMAN	0	0	0	8258700	6170800	2092900	6575800	7250800	3629800	2124000	1357100	2857300	2390100	3354900	2268900	0	2010400	0	0	0	0	0	0	2981200	4310900	3595800	1060000
sp|Q13443|ADAM9_HUMAN	0	0	11151000	25630000	14962000	22991000	11567000	16330000	22882000	11331000	16315000	10479000	18909000	0	9349200	0	0	0	10945000	0	7493100	4564400	0	0	0	17144000	12119000
sp|O95274|LYPD3_HUMAN	0	10351000	0	131580000	19563000	0	0	49406000	111430000	101960000	0	11012000	38705000	34650000	15682000	13978000	0	4116800	0	0	1443200	0	0	13508000	11101000	29295000	22268000
sp|P61026|RAB10_HUMAN	8286700	9098600	6375800	12045000	0	0	28876000	13916000	10685000	8056200	3719800	12444000	8740900	0	0	0	0	10915000	0	8633300	11613000	0	0	0	8003200	18179000	9884900
sp|P50502|F10A1_HUMAN;sp|Q8IZP2|ST134_HUMAN	15243000	0	0	36632000	0	72307000	26300000	80612000	32471000	11666000	4594700	19082000	9624600	33940000	6377900	0	84640000	0	0	0	0	0	0	30789000	14153000	49438000	8164900
sp|Q16401|PSMD5_HUMAN	2086300	2988800	2567800	2651300	2862900	1400000	3003200	1127200	0	0	0	0	0	2450500	0	4568300	0	3649500	1385900	2676000	3187500	2190000	0	0	3006200	5144700	0
sp|O60784|TOM1_HUMAN	2317900	1878500	2550500	5637800	2212400	3620900	2301000	3469700	0	0	3797400	2449700	3259600	0	0	0	0	0	3606200	2500100	3023400	0	0	2076200	0	5890100	1975500
sp|Q6ZMP0|THSD4_HUMAN	0	11181000	23476000	15407000	5824600	0	15262000	13893000	0	0	8120800	13036000	32396000	0	0	0	0	11579000	14626000	7565800	15083000	3471500	3824600	0	0	6899600	2954100
sp|Q9H4A4|AMPB_HUMAN	0	0	8050200	0	0	21218000	12596000	8246300	12887000	0	6127400	28022000	0	0	17021000	9549500	2109000	10198000	12316000	9994700	12893000	16428000	0	0	11594000	15585000	0
sp|P33176|KINH_HUMAN	0	15368000	32720000	16941000	9832900	0	5378100	11031000	7326100	0	9794100	15843000	0	10025000	0	0	0	4764300	5189300	13867000	8562600	4794600	5131300	0	0	9600400	0
sp|P47756|CAPZB_HUMAN	0	0	0	33117000	6317200	3207800	8620100	9072700	4982300	7960200	1239500	1796200	4369500	1220800	4939300	11179000	3041700	0	0	0	0	0	0	0	6246900	3412600	3207700
sp|P00747|PLMN_HUMAN;CON__P06868	1090700	0	118970000	5288000	1480200	2427400	11486000	2367600	0	0	0	6815000	0	0	584130	4608400	0	901660	804580	0	0	1072400	477150	2341300	2419000	8283100	0
sp|P06312|KV401_HUMAN	0	6233900	45265000	17668000	3201300	4075700	23324000	7580500	3195400	0	2269900	9387300	0	0	0	0	0	9895400	24870000	0	12641000	0	4280700	0	18434000	20250000	9872200
sp|O60513|B4GT4_HUMAN	18873000	9833200	14244000	0	0	0	18561000	0	0	0	7757100	14860000	9908100	0	6673500	13208000	11334000	0	12756000	14175000	9428500	9353300	0	25044000	6392800	21025000	0
sp|A0A0B4J1X5|HV374_HUMAN;sp|P01767|HV353_HUMAN;sp|A0A0C4DH42|HV366_HUMAN;sp|P0DP02|HVC33_HUMAN;sp|P01772|HV333_HUMAN;sp|P01763|HV348_HUMAN;sp|P01762|HV311_HUMAN;sp|A0A0J9YVY3|HV741_HUMAN;sp|A0A0B4J1V1|HV321_HUMAN	7366100	0	57568000	6391100	0	8917900	20235000	8415000	0	0	13838000	9860000	11081000	0	0	0	0	11599000	9071200	4827800	8396400	0	5289200	0	17602000	13252000	11095000
sp|P43652|AFAM_HUMAN	0	1799200	5480600	897490	0	1711400	0	2204100	0	0	0	0	0	396140	1715800	3965500	0	15824000	14483000	49146000	60365000	9531300	46994000	3267300	1624200	0	3273000
sp|P07477|TRY1_HUMAN;CON__P07477;sp|Q8NHM4|TRY6_HUMAN;sp|P07478|TRY2_HUMAN	27758000	46282000	78043000	0	4330300	57128000	11565000	0	0	0	12924000	19891000	2065400	0	0	36570000	5758600	41211000	0	0	9987700	27269000	10047000	0	12385000	23937000	0
sp|Q9H0U4|RAB1B_HUMAN;sp|Q92928|RAB1C_HUMAN;sp|P62820|RAB1A_HUMAN	335740000	248230000	70258000	0	509690000	0	0	316050000	209960000	524660000	195160000	1080300000	373110000	0	0	11777000	5826600	0	132570000	0	86586000	0	76796000	0	162720000	109610000	177080000
sp|P06310|KV230_HUMAN;sp|P01615|KVD28_HUMAN;sp|A2NJV5|KV229_HUMAN;sp|A0A0A0MRZ7|KVD26_HUMAN;sp|A0A075B6S6|KVD30_HUMAN;sp|A0A075B6S2|KVD29_HUMAN;sp|A0A075B6P5|KV228_HUMAN;sp|P01614|KVD40_HUMAN;sp|A0A087WW87|KV240_HUMAN	0	0	90373000	10089000	13800000	11325000	118610000	11118000	0	0	6924800	27451000	13017000	0	0	0	0	9878500	10485000	8194800	28098000	0	11771000	2635600	16422000	22435000	9609800
sp|P13942|COBA2_HUMAN	1780700000	0	449940000	8185300000	66799000	0	0	813970000	62303000	344870000	11175000	40057000	24018000	23372000	11803000	280520000	0	0	0	0	0	0	15763000	299100000	17873000	9730700	12570000
sp|Q99536|VAT1_HUMAN	7517200	0	0	26801000	8730500	21795000	19047000	19471000	26334000	6342500	8444400	11276000	11737000	0	0	920320	0	0	0	0	4489100	11607000	7949900	0	7820600	19460000	8123700
sp|O75531|BAF_HUMAN	3970700	3517200	5478400	13297000	0	6371200	12338000	9860200	6962200	9304500	4146400	0	0	0	0	9913800	13589000	4038500	0	2442900	5964800	0	0	19250000	3529100	8995700	0
sp|P35270|SPRE_HUMAN	0	3445600	0	7485000	2070300	2676600	3391200	5038100	10176000	7087400	2650600	3672300	4033400	0	0	1626400	0	0	2695200	2916500	3278900	0	0	0	8394000	13702000	5771400
sp|P61163|ACTZ_HUMAN;sp|P42025|ACTY_HUMAN	0	0	0	21900000	25040000	12443000	21536000	38021000	10637000	8441800	6729800	21639000	10022000	0	8317400	13150000	29675000	7477500	0	5885400	0	0	0	0	10838000	28778000	5034500
sp|P21399|ACOC_HUMAN	15344000	13409000	0	18977000	10240000	63269000	7329600	9740200	12861000	8233200	5329600	0	6761700	0	0	0	0	0	12692000	14484000	14076000	0	25688000	5463000	0	16506000	15081000
sp|Q16851|UGPA_HUMAN	0	0	0	27184000	25847000	21735000	55629000	42001000	29054000	108460000	29192000	22711000	13317000	49670000	18202000	33053000	76435000	0	0	0	0	0	0	23951000	14757000	40978000	11770000
sp|P05164|PERM_HUMAN;sp|P11678|PERE_HUMAN	0	0	1207800	372590	1488800	2889200	877020000	518940	0	365420	562110	668170	413150	250640	2238400	0	618440	0	0	0	0	0	2198400	634410	488490000	8539900	1550000
sp|Q7Z7B7|DB132_HUMAN	10927000	0	16769000	13696000	19264000	32465000	18183000	14144000	0	0	25163000	10925000	0	0	6570700	0	43935000	2337600	9750000	9279900	0	1845900	0	35664000	12348000	44585000	0
sp|P47755|CAZA2_HUMAN	0	0	0	28947000	0	50469000	66079000	14420000	48463000	0	8317200	31621000	22098000	64500000	39654000	79365000	26038000	0	0	25620000	20969000	11095000	0	0	39217000	25396000	25599000
sp|Q6ZMT4|KDM7A_HUMAN	2774900	0	13191000	0	20033000	11153000	27389000	0	8475200	6557100	0	5327900	3168700	0	0	0	0	11685000	9418300	14071000	17005000	11412000	8287500	0	5443700	34470000	5880600
sp|Q5GAN3|RNS13_HUMAN	0	0	15235000	17103000	59790000	54592000	50813000	60406000	6416800	6994800	27108000	9076000	0	13463000	2528900	23057000	12695000	0	22757000	0	0	0	0	0	7186000	13024000	3460800
sp|Q8IYJ3|SYTL1_HUMAN	0	0	7430800	40307000	6260000	14327000	3848400	11774000	14635000	0	7991500	16076000	8109900	0	2463100	0	0	6165700	7135900	11550000	10717000	0	0	0	6931900	12678000	8470700
sp|Q01469|FABP5_HUMAN	1725300	0	2690600	4284400	0	7596900	26563000	17099000	5205200	0	3798600	4512800	0	3222000	1248800	0	12230000	5087100	2812200	2163000	0	0	0	0	6821000	6679200	3399400
sp|P60709|ACTB_HUMAN;sp|A5A3E0|POTEF_HUMAN	0	0	59601000	28462000	15957000	0	59880000	10387000	0	0	79587000	22586000	18953000	16790000	24688000	0	140980000	7188900	0	8235800	7252800	4158000	0	59524000	22308000	17994000	0
sp|Q96IU4|ABHEB_HUMAN	3943000	6463600	4159500	27931000	0	0	7032000	3721100	3886200	0	0	0	0	0	6151100	0	10430000	2350700	3744400	4141900	4866800	4246700	4149800	5741100	8998500	7397500	0
sp|P40121|CAPG_HUMAN	5075900	0	7153600	7891400	5886500	6127600	0	7044900	7451400	0	0	0	0	12297000	9118300	0	0	0	8561400	10257000	5100100	9229400	13391000	3689400	6399500	6846900	7232300
sp|Q8IVN8|SBSPO_HUMAN	0	0	10054000	9981900	11800000	18199000	0	8199100	4720100	0	9349400	10162000	5849900	0	7373500	0	5761400	3390800	4764300	7559700	5240200	0	2596600	0	7198100	0	4252700
sp|P01042|KNG1_HUMAN	0	0	133610000	20647000	5923200	16628000	45383000	0	0	2691500	10348000	24356000	0	16386000	4880700	0	19974000	43287000	15649000	14714000	21032000	0	0	23399000	35061000	0	16012000
sp|Q13370|PDE3B_HUMAN	0	32836000	0	63483000	51118000	72289000	63698000	50947000	0	60885000	189880000	426920000	380410000	60350000	55768000	0	61152000	40099000	0	0	0	46163000	0	0	33541000	45603000	49376000
sp|P54578|UBP14_HUMAN	0	0	0	39517000	10983000	20549000	13569000	18713000	0	0	3019100	10544000	20839000	0	127040	0	0	8270200	9572300	6548200	14162000	12191000	1457000	0	1665200	6996500	2492600
sp|Q08722|CD47_HUMAN	0	0	17892000	52659000	46337000	62274000	218310000	36576000	6538500	0	11491000	11689000	14139000	0	0	0	0	10404000	16299000	15934000	14877000	13803000	16164000	0	22099000	195910000	34622000
sp|Q8TCG1|CIP2A_HUMAN	361510000	0	0	1942100000	0	698520000	663570000	1008400000	2338700000	1478600000	422260000	0	5507100	57280000	1267800000	3290000000	2560500000	0	0	0	0	68113000	576170000	520830000	1303500000	1683300000	898500000
sp|Q06210|GFPT1_HUMAN;sp|O94808|GFPT2_HUMAN	0	0	1702500	0	2446100	3549400	4990800	10575000	0	0	3434800	10440000	16071000	2313900	1457300	1311900	2197800	2417600	1680600	1458100	4092200	1939700	0	0	0	5123800	2026800
sp|Q96G03|PGM2_HUMAN	12670000	2425300	3102900	30726000	10240000	0	10563000	16102000	5497800	0	2829600	7585500	16035000	0	0	0	0	5341500	8165400	3822500	4979700	7962400	8573200	11804000	0	6592800	0
sp|Q9Y230|RUVB2_HUMAN	0	0	0	0	5664400	2753500	34625000	21274000	3164300	0	12263000	6469800	0	2529000	1650900	2360900	20760000	6364300	3596600	0	14584000	4897800	4747200	4194300	4675800	24014000	0
sp|P31150|GDIA_HUMAN	5049200	10947000	9514400	0	0	17051000	22087000	7510900	0	0	5738200	9896600	0	7672300	0	0	5368400	6132700	4770500	8742200	8671100	10667000	11440000	0	4399900	9453500	4355300
sp|P37802|TAGL2_HUMAN	4828600	7688100	16298000	22186000	18306000	13494000	9053200	17288000	0	0	7587300	9907400	38382000	27280000	10859000	10807000	9572000	0	6710900	8156500	6147600	0	0	21526000	0	0	0
sp|Q8NFZ8|CADM4_HUMAN	0	0	6694900	84555000	17603000	0	10019000	12052000	24484000	0	17209000	13258000	9148300	0	0	0	0	4142000	7711200	7669900	8275500	6772900	9580700	6636100	10138000	19388000	14163000
sp|P07384|CAN1_HUMAN	0	0	0	27028000	12449000	6769700	10584000	4828900	18904000	18490000	5028100	2748800	0	27476000	9930100	5445800	0	5503400	0	6160700	0	5554100	0	9479800	5510400	4469700	13481000
sp|Q5BJF6|ODFP2_HUMAN	0	0	1649500	11744000	11586000	3238000	29686000	14160000	27234000	3654000	4813200	8041400	0	5979400	0	6571200	8904100	12410000	1906800	0	2649000	0	0	13732000	2491500	89541000	0
sp|P26640|SYVC_HUMAN	1574500	2959000	3787000	5664300	5843100	1790700	46068000	16193000	2343600	1586600	587290	2990100	0	874870	0	0	23937000	11173000	984760	5503000	2084100	0	0	0	0	8601400	0
sp|Q15506|SP17_HUMAN	0	0	7387500	63549000	32628000	27916000	78963000	27199000	11652000	8228900	4291700	6639200	0	7662500	0	87008000	1557000	0	3647300	0	65375000	0	18428000	93208000	3974600	40574000	0
sp|Q9BS86|ZPBP1_HUMAN	0	0	10236000	82260000	29907000	24143000	286550000	198830000	13398000	5129800	24860000	13213000	0	6704700	0	30630000	5111500	13333000	608610	569290	0	0	0	38415000	833990	70370000	0
sp|P51149|RAB7A_HUMAN	0	9068100	0	21954000	8346800	37568000	9761800	9052100	15129000	0	10622000	8451600	7039700	0	11509000	0	0	0	16697000	17411000	11191000	12707000	14978000	0	10575000	15089000	9045300
sp|Q92542|NICA_HUMAN	0	5040200	4289200	15559000	0	4022800	4280600	13958000	7906400	4885300	10228000	2586700	0	6845100	5083500	8223700	0	0	0	8876700	6715700	2648800	0	0	10682000	16900000	5607400
sp|Q969X1|LFG3_HUMAN	14606000	0	6231000	16926000	0	10969000	17657000	20895000	0	8837000	20905000	31253000	0	0	14779000	0	21132000	10929000	9640200	25982000	12430000	13399000	13520000	11097000	0	17206000	0
sp|P12955|PEPD_HUMAN	2932800	0	6666700	6499800	41333000	15905000	11302000	5604200	6814700	7769400	0	2544200	3378500	0	0	0	0	0	5719100	0	16252000	17362000	2048300	11597000	10624000	8372200	5385300
sp|P07996|TSP1_HUMAN;CON__Q28194	9996200	16034000	3241600	32090000	0	13258000	31120000	21309000	0	26061000	10568000	10818000	52091000	9011100	11616000	10129000	9776500	0	13905000	0	16169000	0	0	0	27482000	26082000	0
sp|Q9BQ16|TICN3_HUMAN	9157900	0	0	34699000	19270000	0	25376000	29814000	0	0	6286500	18033000	20471000	30967000	18415000	21445000	0	0	8111700	6281000	5528800	9138700	10754000	0	8564200	109640000	6283100
sp|Q9Y265|RUVB1_HUMAN	4636800	0	4788600	23041000	18769000	7428500	114340000	83325000	7090000	0	9829500	8327100	0	2911000	6182900	0	93598000	13420000	0	0	24317000	11542000	0	11498000	5939800	40948000	0
sp|Q9BRA2|TXD17_HUMAN	6711400	7444300	8146300	0	5793100	10240000	0	11036000	13459000	0	14570000	12147000	20060000	0	0	0	0	10135000	9933300	10177000	11555000	11389000	8729600	0	10820000	16559000	5868400
sp|Q14515|SPRL1_HUMAN	0	13910000	3138300	51851000	45993000	8389700	7008800	21967000	13074000	0	3545000	15437000	20487000	0	0	10734000	0	0	4742200	0	2833100	1640600	0	12635000	4701000	31825000	8925900
sp|O43653|PSCA_HUMAN	125410000	318500000	0	0	251530000	354770000	412840000	665570000	316190000	0	66496000	59278000	472080000	0	197530000	74174000	181760000	43866000	0	91891000	159240000	173690000	0	0	0	655400000	250950000
sp|P28066|PSA5_HUMAN	0	26505000	0	60683000	9201600	30397000	83779000	36554000	13426000	8170600	19341000	12843000	11535000	0	0	13349000	16061000	0	0	0	4114500	2907100	0	9563500	5409100	18777000	5480500
sp|P02647|APOA1_HUMAN	2141200	475830	812170000	0	0	2200600	11034000	0	0	0	406450	22742000	0	0	7544800	1717200	15343000	74911000	858350	721560	3893100	447720	6146900	213450000	2177400	5120300	0
sp|Q8N339|MT1M_HUMAN;sp|P80297|MT1X_HUMAN;sp|P04732|MT1E_HUMAN;sp|P02795|MT2_HUMAN;CON__P67983;sp|P13640|MT1G_HUMAN	17346000	0	65840000	0	0	19628000	63649000	17135000	48130000	150890000	0	0	0	9863100	5270600	7928100	8258600	20476000	21175000	32631000	20633000	41758000	44302000	0	38738000	86378000	14127000
sp|P45877|PPIC_HUMAN	5196300	14240000	0	11018000	9703600	5941800	7111300	3817900	1991600	9700100	4360300	13648000	5245500	0	0	0	0	0	5916100	4781400	4639300	2457100	1363100	0	6136000	7024600	7556200
sp|Q9H0R4|HDHD2_HUMAN	3550400	4574700	3976300	29961000	7444200	19365000	7964400	10328000	7011900	6489000	2834800	6348700	0	0	0	4499600	0	0	4088800	3773800	2664300	4054800	0	4234800	0	28160000	5422600
sp|Q96PD5|PGRP2_HUMAN;CON__ENSEMBL:ENSBTAP00000016285	0	0	15096000	4695800	2366800	1612300	4221200	3751600	4376300	6162500	1784100	5846700	0	0	2454900	24928000	0	13468000	0	3140500	3075400	1132900	6151400	0	7255400	5674200	4161100
sp|Q6XZB0|LIPI_HUMAN	0	10487000	0	5532500	9873000	13446000	11462000	7150700	0	27061000	2276200	5427700	3942500	18631000	1475800	0	10248000	0	4841500	3971300	5655700	3803000	4812400	8411800	0	8879300	0
sp|P61158|ARP3_HUMAN;sp|Q9C0K3|ARP3C_HUMAN;sp|Q9P1U1|ARP3B_HUMAN	5298800	6739700	0	21074000	8651400	4411800	47231000	6739300	8235800	5506900	0	5179500	7164500	0	4564500	0	0	7370500	0	10460000	19509000	9761400	5676300	0	19058000	8967400	4087800
sp|P09488|GSTM1_HUMAN;sp|Q03013|GSTM4_HUMAN	22511000	17173000	20077000	15119000	25389000	0	0	12210000	8544000	0	2758100	16115000	0	0	0	12318000	0	29508000	885630	6694400	20461000	4554600	25318000	9527900	8107600	8990300	15032000
sp|P68036|UB2L3_HUMAN;sp|A0A1B0GUS4|UB2L5_HUMAN	10930000	15381000	7948500	18372000	19509000	48257000	44751000	0	42699000	0	6317300	28203000	0	49461000	0	36646000	0	0	12405000	13867000	9474300	0	8533300	14632000	13649000	21441000	10762000
sp|Q08431|MFGM_HUMAN	15317000	13283000	18255000	32458000	0	24936000	46838000	0	2783200	10107000	13637000	11605000	0	34003000	9342500	0	0	14975000	22273000	10689000	16085000	19389000	10070000	22358000	0	17534000	0
sp|O43493|TGON2_HUMAN	4028300	0	4598700	14206000	4412100	4515100	7110700	4266300	3812000	0	7009200	0	13101000	0	0	3441900	3107800	2769800	2438000	3277700	3406000	4834500	7005300	2459800	0	5105200	0
sp|Q92820|GGH_HUMAN	0	0	9213000	52895000	14735000	20313000	137890000	48744000	4657400	4859800	10271000	6075700	0	13562000	0	6719400	11720000	2808200	5349400	3949900	4679900	0	0	24728000	0	39970000	385170
sp|P11169|GTR3_HUMAN;sp|Q8TDB8|GTR14_HUMAN	1637800	1809400	9951600	4670100	25509000	6728000	46765000	6915500	6270300	0	3162900	0	0	4956200	0	4348200	0	16144000	6518800	1647600	11845000	1717600	0	54498000	4017000	15949000	0
sp|Q02487|DSC2_HUMAN	0	0	10341000	23898000	27714000	26106000	15164000	31016000	38370000	30187000	10145000	29267000	35614000	0	13076000	0	18666000	15546000	12126000	12034000	11562000	11485000	30998000	8203200	0	0	0
sp|P43490|NAMPT_HUMAN	0	0	0	51067000	27146000	66396000	22396000	22753000	31691000	17999000	13609000	17419000	15326000	25532000	0	24607000	21438000	24791000	15989000	21448000	33723000	0	0	13576000	42885000	34035000	0
sp|Q687X5|STEA4_HUMAN	0	4704200	0	3051900	0	5275900	4917400	20329000	50014000	0	4628800	6416000	18689000	10104000	12688000	14804000	8463900	7844200	7700100	5175800	0	0	2086400	0	4749300	10223000	13347000
sp|P21741|MK_HUMAN	0	0	4719600	6566200	5822500	9783200	5106900	7820000	7416600	0	4270600	11198000	5693100	0	0	0	0	5016000	5681700	5774600	6774700	5535400	5058200	4101600	8166600	11930000	6691100
sp|Q9HAT0|ROP1A_HUMAN	0	65589000	0	18275000	5825500	7710200	117680000	7290400	3749400	10890000	4150400	6238600	7117000	14641000	3316000	3843800	1363000	23727000	0	0	0	1786800	3602200	60914000	0	70140000	0
sp|P09525|ANXA4_HUMAN	10644000	10479000	16446000	38155000	9865400	17528000	9114700	27177000	29544000	18382000	14726000	17307000	19375000	0	0	0	0	12302000	0	11983000	0	12231000	0	18292000	11234000	55802000	10116000
sp|P06576|ATPB_HUMAN	0	0	22297000	81051000	31720000	11755000	88728000	117820000	25100000	0	56292000	13773000	46685000	0	12311000	5908900	121280000	15695000	11139000	0	12178000	0	0	16654000	20876000	60173000	8705100
sp|P61626|LYSC_HUMAN	24878000	7566300	42588000	7167800	16467000	36639000	376290000	8922500	12270000	0	9849400	0	0	37064000	0	7362100	17959000	0	9501000	10375000	0	4949000	25237000	0	314890000	141380000	10055000
sp|P17612|KAPCA_HUMAN;sp|P22694|KAPCB_HUMAN	0	0	7181400	10648000	6684700	49453000	128460000	126260000	3329200	0	9845900	5321700	0	0	0	4954100	12228000	11995000	6715600	8926600	7847000	9118000	4929900	0	18305000	53721000	18475000
sp|P11908|PRPS2_HUMAN;sp|P60891|PRPS1_HUMAN;sp|P21108|PRPS3_HUMAN	35614000	16594000	8337300	0	14018000	12857000	6532600	9613200	7963400	18513000	4918800	12607000	20167000	0	13933000	19272000	0	22928000	15000000	0	47611000	6320300	0	30277000	8215600	0	0
sp|P49747|COMP_HUMAN	0	0	9636100	5883900	0	6782400	21769000	13149000	0	0	7655700	8994600	19703000	18755000	7393300	0	63189000	4158600	12968000	0	8118000	2195700	19881000	41312000	3265800	8931200	2000900
sp|P01619|KV320_HUMAN;sp|A0A0C4DH25|KVD20_HUMAN	7298700	7967900	64044000	0	30221000	8364700	36771000	7709300	3543000	0	0	0	1451900	18516000	10735000	0	10109000	10919000	11301000	8119500	0	8689300	10912000	0	16500000	39507000	9938800
sp|Q08345|DDR1_HUMAN	7453900	0	9827000	16415000	7152000	26130000	11270000	45980000	0	0	4251600	11099000	0	0	9778100	0	9176800	11270000	8975300	19678000	9102400	8874700	12729000	0	6020800	10683000	7232700
sp|P35475|IDUA_HUMAN	8951400	16624000	47573000	0	15086000	14963000	13270000	11257000	20707000	63130000	11621000	28557000	15704000	0	0	0	0	18016000	17898000	0	21877000	46158000	362730000	39218000	12446000	0	18749000
sp|P24593|IBP5_HUMAN	0	3098800	40952000	248170000	79561000	94809000	32947000	179230000	0	14690000	9817000	0	53138000	5663700	0	23896000	12547000	0	9007600	0	12516000	7678600	0	7415100	14333000	72806000	12367000
sp|P55786|PSA_HUMAN;sp|A6NEC2|PSAL_HUMAN	0	0	9192600	25766000	9449800	25193000	16988000	21191000	22092000	0	7906900	19968000	22964000	0	0	7813300	27469000	10429000	9555900	8149500	15214000	0	17467000	0	8228700	20435000	8189700
sp|P04062|GLCM_HUMAN	12833000	20641000	13501000	21743000	50947000	16012000	11970000	5483500	14373000	47448000	7556900	0	15399000	0	0	0	0	17008000	32157000	26771000	10443000	0	0	20935000	35678000	10514000	10533000
sp|P29966|MARCS_HUMAN	0	10718000	7011000	30257000	0	0	9877500	9975500	10067000	0	9156100	10396000	10421000	8142400	2606700	6760200	4111700	15181000	3765700	0	5352500	8444000	12701000	3252500	0	20209000	0
sp|Q9NZ08|ERAP1_HUMAN	29692000	35331000	15750000	119410000	0	25959000	0	52954000	44413000	0	27832000	45437000	51895000	46402000	15866000	81291000	0	63181000	33189000	21828000	46472000	24784000	19419000	118030000	0	0	0
sp|Q9Y490|TLN1_HUMAN	5943600	8002500	0	8765600	11292000	3771900	11075000	4823100	11702000	7669200	3749400	16518000	8658600	0	10383000	2855800	6857900	0	0	0	0	9735000	8654100	0	27287000	20431000	5048400
sp|P08195|4F2_HUMAN	0	0	9601100	40627000	30528000	45511000	37139000	18072000	12621000	13766000	5469400	19881000	9538500	0	26852000	35371000	0	8120100	5471900	5268500	4376100	0	0	0	8855100	13877000	12607000
sp|P20827|EFNA1_HUMAN	0	0	13472000	30569000	0	24180000	27357000	21520000	7604400	0	8511700	21147000	10831000	8308200	4914000	10084000	0	6723000	8806600	6312600	9759800	6231800	7683700	13844000	0	19593000	13484000
sp|Q9Y624|JAM1_HUMAN	8613800	0	0	29367000	3620500	16348000	18793000	24227000	9003300	0	8526600	10101000	19567000	15592000	8240200	11023000	6685800	0	18551000	14849000	25103000	0	23176000	0	8121900	15540000	9640800
sp|P02748|CO9_HUMAN;CON__Q3MHN2	9544400	8051100	19055000	29844000	4936700	14648000	20238000	0	4349300	7226400	5926800	7969100	10235000	46283000	0	6729600	0	12719000	1620300	6065400	4941000	5883900	6333500	0	0	5967300	0
sp|P25788|PSA3_HUMAN	0	12245000	10131000	13842000	8822000	7840800	16255000	8899300	4574900	7584100	21155000	23895000	11721000	6254500	2376800	4299100	0	8152400	6204800	6611100	10110000	8622900	14809000	0	0	0	0
sp|Q07654|TFF3_HUMAN	25563000	61843000	46643000	113150000	21551000	16251000	28616000	51466000	54822000	0	15170000	61624000	50169000	37185000	16270000	9404100	17136000	0	17117000	0	0	0	0	41035000	30835000	30190000	81734000
sp|P47895|AL1A3_HUMAN	7127200	8591900	4609600	17926000	17884000	6589600	12984000	24473000	6487600	0	4882700	13945000	11170000	0	0	0	0	9160200	4904400	13775000	5299100	8175300	6134900	0	10396000	15077000	9133000
sp|Q06481|APLP2_HUMAN	82437000	0	1360800	163190000	17785000	186840000	57601000	70530000	179960000	145420000	57919000	78559000	23728000	170560000	98507000	71473000	21520000	0	0	0	36220000	1131600	6787800	0	0	114070000	30606000
sp|Q9H2U9|ADAM7_HUMAN	12352000	3536400	0	11709000	7561700	31854000	87390000	59493000	10362000	9001100	9351800	9716600	3096700	5163300	0	11417000	134300000	0	15088000	0	12761000	12796000	926110	0	0	45572000	5884000
sp|Q9H1M3|DB129_HUMAN	10078000	0	67085000	29752000	9627600	79652000	260940000	22806000	6261500	0	17661000	0	0	19479000	14487000	17328000	33390000	6007500	10445000	7292600	11509000	56527000	12998000	25671000	0	177090000	0
sp|Q6BCY4|NB5R2_HUMAN	0	6131300	23006000	134340000	26309000	63133000	263450000	48645000	9582800	7704400	6505500	56140000	0	32234000	6037000	41450000	34207000	5649400	0	1860700	4621600	0	1803100	15144000	0	103420000	0
sp|P46783|RS10_HUMAN	4837100	8145500	6713400	3824700	6795800	0	12529000	5367100	5272100	3322900	2558900	12454000	0	0	0	0	0	5829100	780240	3039200	3718300	7317400	2439800	2846900	4613300	10403000	4687800
sp|P31025|LCN1_HUMAN;sp|Q5VSP4|LC1L1_HUMAN	28482000	3843400	0	41315000	47988000	0	416890000	5010300	3290300	78709000	0	54732000	167400000	0	7693400	108020000	907930	41189000	0	44608000	104670000	2395300	24007000	11036000	0	4399400	101560000
sp|Q14204|DYHC1_HUMAN	8413400	6995000	0	9667300	6672600	5749600	11538000	9157300	10154000	7195500	13913000	11077000	0	13905000	8400100	5644100	21399000	24771000	0	0	0	3156500	4989500	0	22866000	11215000	9753200
sp|P30711|GSTT1_HUMAN	3050800	0	6015100	0	2604100	22315000	3219300	27704000	21343000	0	10764000	165970000	5385200	20435000	0	11319000	2255800	6261600	12164000	16555000	5721700	14696000	18181000	4235200	12759000	0	0
sp|P45974|UBP5_HUMAN	0	0	5159600	11763000	5702200	5555600	8380100	15747000	10900000	6398300	4774800	7046800	9196000	14147000	8797700	5652700	7992700	8442300	0	0	12814000	0	0	3095400	11047000	7298000	5369000
sp|A6NM11|L37A2_HUMAN;sp|A6NMS7|L37A1_HUMAN	11609000	1898900	19504000	59153000	4963700	13621000	121990000	17613000	5391500	21716000	4315600	6702800	0	9460200	0	8409000	12255000	16131000	0	0	0	0	1040500	18625000	6481100	24881000	11283000
sp|P50995|ANX11_HUMAN	0	0	12808000	53297000	10879000	6758100	17288000	42803000	6753400	0	5385700	0	15797000	21526000	6107200	20942000	8141900	14896000	10039000	21319000	11046000	12671000	0	10496000	13284000	0	8247100
sp|P51148|RAB5C_HUMAN;sp|P20339|RAB5A_HUMAN	0	0	9438900	19617000	17913000	7717200	16437000	30664000	13661000	5322700	8844700	15569000	10652000	12232000	0	0	0	10321000	8928000	9538500	14408000	13103000	13345000	0	9113400	24555000	14063000
sp|P53634|CATC_HUMAN	4517500	23647000	13795000	43167000	13856000	4717900	3709600	46005000	12401000	0	5842400	5848300	3247000	0	3285300	0	14254000	11019000	16026000	11258000	7543100	0	0	8042100	0	7639300	14456000
sp|P68871|HBB_HUMAN	1167400	771210	859580000	4366100	0	416350	365670	670030	4126100	0	78284000	6835000	62201000	0	0	1422300	0	6794200	12155000	3113600	1704500	961610	196570	583540	10572000	51852000	0
sp|Q7Z4H3|HDDC2_HUMAN	0	5299300	4001400	27141000	20410000	10636000	66670000	67894000	6752100	4289100	6001800	7996900	0	8974000	0	1518100	10426000	5128100	2789800	0	4035700	3080500	0	23529000	14154000	49640000	0
sp|O95394|AGM1_HUMAN	0	0	13793000	19095000	7913800	0	10733000	11328000	13016000	0	16684000	0	0	6657800	7099900	8520000	6424100	19292000	12229000	12015000	23547000	11894000	15275000	5522300	11401000	10698000	8175900
sp|P48643|TCPE_HUMAN	0	6641200	0	19117000	5046300	8223400	50003000	23054000	14324000	12220000	11495000	13835000	0	30695000	6213800	14504000	17304000	0	0	6697000	22037000	7167200	10659000	9531700	8765100	53676000	7980400
sp|Q6UXD5|SE6L2_HUMAN	0	0	7713200	50106000	10405000	15812000	20878000	8377000	15013000	12440000	16145000	7368400	9004900	7707800	7348200	9002700	3272800	0	0	9029300	3881000	2777200	0	11025000	9151800	21819000	6268600
sp|Q9Y5P6|GMPPB_HUMAN	13055000	8579100	4570500	25152000	0	17331000	3911500	7953500	8088200	0	3688200	14159000	13113000	0	12890000	0	0	12867000	7006100	8597500	9257200	11760000	11202000	20605000	8241400	8489600	5076400
sp|P23381|SYWC_HUMAN	0	4692200	7139900	12711000	15976000	8593900	18892000	30555000	10507000	0	10157000	12069000	9907100	8400200	7163100	0	21268000	4043500	5011400	2605400	3917000	0	0	2836200	11609000	8747900	5670500
sp|P40926|MDHM_HUMAN	4913200	16774000	13470000	22649000	62278000	8194300	46321000	60966000	8977200	14603000	19806000	12140000	5793800	14953000	8990400	46990000	214930000	14305000	0	0	0	0	0	34764000	3186000	79796000	4423600
sp|Q8NF91|SYNE1_HUMAN	134790000	517910000	0	15826000	0	58689000	32902000	59389000	50225000	0	38990000	72433000	174980000	0	75056000	47995000	13746000	733710000	327690000	79139000	744790000	653080000	445160000	12801000	305120000	0	89521000
sp|O43657|TSN6_HUMAN	29037000	20793000	28653000	51461000	0	19993000	82231000	75819000	26543000	22737000	28425000	42857000	28581000	0	0	14056000	10197000	10551000	20390000	35137000	41017000	15087000	34577000	0	0	44763000	12849000
sp|P07741|APT_HUMAN	5204100	4817000	9463300	15438000	10114000	11022000	6920000	6088100	16924000	1739700	0	6744900	3445100	0	0	0	2562500	5319500	6087700	5336800	4131500	8044300	8455900	0	5259200	8933100	3721200
sp|Q9GZN4|BSSP4_HUMAN	12431000	6370600	6022500	29304000	17635000	17476000	10345000	13590000	0	23412000	7426100	12964000	0	14641000	10298000	0	9870300	0	5298400	6470700	7336900	2256800	5111700	14658000	0	4151600	17949000
sp|P59666|DEF3_HUMAN;sp|P59665|DEF1_HUMAN	180440	0	35915000	53352000	24446000	2128800	434530000	805740	0	0	0	4437900	1558600	437580	2061900	1178200	9251100	3015600	1750800	2698900	0	1493300	3366800	33037000	3980300000	35704000	4879200
sp|O75083|WDR1_HUMAN	7723700	0	0	0	30157000	16681000	18417000	25119000	10076000	0	10537000	9072400	12392000	0	15699000	8715000	13230000	5764500	11342000	8045700	8507500	8872800	7281600	31953000	20467000	16565000	11153000
sp|Q16769|QPCT_HUMAN	35975000	15340000	12246000	26370000	6712700	5330800	23956000	11607000	28915000	83112000	0	7751000	0	10785000	2396200	0	19067000	0	7301300	8970100	21857000	3710500	0	65377000	12020000	88003000	11570000
sp|Q9Y287|ITM2B_HUMAN	32235000	30179000	5605100	18065000	6766100	18124000	0	45502000	40645000	29239000	8305800	15222000	11181000	12529000	0	50886000	0	25418000	6024500	11539000	15163000	0	5004300	0	26405000	43088000	17149000
sp|O14494|PLPP1_HUMAN	18683000	12690000	16556000	10818000	0	10668000	11451000	32707000	24997000	19759000	16838000	15347000	0	0	30617000	64201000	36162000	11588000	0	7318600	15339000	10522000	15755000	0	6595600	35794000	13558000
sp|P80188|NGAL_HUMAN	2118900	0	21544000	3179200	19919000	2223900	1028600000	918210	410850	0	333720	4212300	3737800	1228400	3154500	0	39611000	2039600	1818100	1070000	0	0	12267000	5133100	358390000	73908000	3147200
sp|Q16348|S15A2_HUMAN	11878000	4764800	9031500	0	0	5691700	8045700	10727000	17482000	0	8104900	8625600	15018000	0	0	3588100	6254200	10450000	17102000	8265100	18293000	7869600	5543400	10251000	6521900	15781000	7785000
sp|P22234|PUR6_HUMAN	6050800	0	8141600	30322000	27731000	35773000	13021000	22820000	25107000	14666000	5520600	11237000	16987000	20439000	9169300	21799000	11175000	14282000	7914300	0	0	12526000	0	0	27932000	20266000	9810400
sp|O95399|UTS2_HUMAN	21623000	30967000	32408000	75568000	59966000	31452000	91250000	110950000	17600000	52867000	24216000	91366000	31258000	27917000	27172000	34483000	118480000	18697000	0	0	0	0	17534000	0	27449000	143050000	10147000
sp|P04085|PDGFA_HUMAN	5592100	31896000	27081000	20698000	9559400	12253000	9082800	0	19272000	27715000	9913500	0	11119000	0	4618800	0	4226700	13815000	28363000	21969000	23341000	20664000	9779000	0	9991100	10058000	10904000
sp|O76074|PDE5A_HUMAN	155450000	188750000	55778000	1285500000	1299900000	347700000	156570000	151450000	242580000	596090000	60849000	221420000	930810000	0	0	0	0	173580000	83854000	57882000	37846000	34013000	16933000	0	577740000	163030000	416210000
sp|O14745|NHRF1_HUMAN	0	7255100	0	14818000	11733000	11674000	12977000	11671000	0	5115700	6919200	0	17614000	0	3565600	4288900	8310400	6249400	5077600	5132600	7069000	5337900	7516600	3350700	8413400	9036300	9619400
sp|P28072|PSB6_HUMAN	0	28828000	16159000	34754000	6432000	40012000	64097000	37697000	19284000	0	30995000	30615000	26083000	14986000	0	0	0	19663000	11339000	16078000	21813000	17303000	22683000	3929300	7539900	31314000	12976000
sp|Q13275|SEM3F_HUMAN	10297000	9717600	9137900	27437000	15062000	12921000	12366000	18867000	7559900	23356000	7531700	12961000	8664000	3864800	0	0	0	7478600	16814000	8303200	11213000	5658700	0	0	10161000	20519000	19219000
sp|Q3LXA3|TKFC_HUMAN	0	0	5172000	17600000	9372200	3337100	33820000	21991000	5816100	0	6024900	6692300	10202000	6432600	2032000	4350100	4054500	6504800	3714500	4074000	6097700	8316800	0	5201700	8954900	27006000	2681800
sp|P13797|PLST_HUMAN	2777400	6351900	10552000	29762000	3714500	26441000	69437000	9254100	7561800	16691000	6228300	10222000	0	2628400	0	0	6964200	5520700	7128800	2091400	8891500	0	9073600	2555100	8815300	30004000	7363900
sp|Q9NY87|SPNXC_HUMAN;sp|Q9BXN6|SPNXD_HUMAN	0	0	4644500	56143000	26786000	7615900	77948000	57580000	10957000	0	4537100	31796000	0	17748000	2554400	22758000	18840000	21585000	5111200	2522200	4704300	2355800	4048500	14162000	2250700	72590000	3590600
sp|P40227|TCPZ_HUMAN	0	4953400	4711300	4784800	4196500	4461200	25815000	14053000	9376900	2931300	4349800	5106400	6120300	0	9849200	6978000	9213700	6948400	3075400	0	5080600	5450900	3510400	0	9105600	22965000	4740200
sp|Q9NRX4|PHP14_HUMAN	0	5532200	0	41206000	17491000	15475000	16763000	15285000	5179300	14525000	16677000	0	21334000	12375000	8483000	12424000	0	9212700	6919300	15970000	9584300	23946000	10478000	9045000	17355000	14489000	13024000
sp|P00492|HPRT_HUMAN	0	0	18021000	26142000	10915000	54882000	241720000	43532000	2203900	13829000	12144000	32036000	0	11520000	0	4105300	32882000	12141000	14005000	2446000	1483300	16517000	9259800	13177000	10800000	27214000	4983600
sp|P25786|PSA1_HUMAN	0	0	16676000	50057000	0	28371000	82104000	35097000	7012100	9828200	20420000	32535000	14466000	20934000	8374300	0	42340000	9651800	10795000	9144700	15224000	16076000	9099400	12009000	6643000	33882000	11908000
sp|P49588|SYAC_HUMAN	2568500	0	5165300	9427900	3899300	5705200	2767100	4309000	9862900	2332900	2352400	10568000	6168500	0	0	4980000	2510800	3741400	0	2489100	3962100	3589200	2079700	4048100	5631200	3327900	3519200
sp|P62873|GBB1_HUMAN	10569000	12530000	0	47684000	11319000	30577000	15474000	22152000	14263000	45971000	4530900	7938300	7650800	53066000	23174000	42358000	23363000	20255000	16775000	0	0	12420000	0	78627000	22158000	21961000	11189000
sp|Q9NZ53|PDXL2_HUMAN	5357600	4158900	0	6439600	15602000	16566000	9917900	3476900	4726500	11499000	3384500	4388500	4580100	965170	0	0	0	2697700	2649100	4368600	3394400	3654800	2785700	2601900	4099300	12264000	5942500
sp|P08236|BGLR_HUMAN	6988300	14350000	9204700	26131000	8687200	5225600	11262000	11444000	6001300	13327000	5032500	9355700	6144200	4897500	6702800	0	0	7547900	8551200	6951100	4280300	4239200	0	0	8680400	9605200	6693300
sp|Q9BZQ8|NIBA1_HUMAN	4586700	8833100	32008000	22070000	0	21198000	10998000	20966000	33175000	5618200	6380200	13892000	13118000	16122000	0	0	0	13200000	5012700	15114000	15326000	9540600	12924000	21216000	8036600	11591000	13716000
sp|Q02790|FKBP4_HUMAN	6546100	0	7274100	10732000	12282000	4603400	6641500	0	10400000	0	2699500	12055000	11373000	18727000	12664000	4833500	15317000	10329000	5810100	0	8087700	17766000	14434000	21648000	8767300	6250100	5465600
sp|Q9NY33|DPP3_HUMAN	5491800	12277000	0	17420000	12533000	27948000	8731400	0	30661000	16850000	6232000	0	6393900	8574100	14935000	10028000	8086200	6871600	0	9389700	5934500	8112900	9908600	7080400	17332000	17638000	20459000
sp|P21810|PGS1_HUMAN	0	10413000	20807000	19969000	35939000	96331000	31553000	18646000	9674800	0	11786000	11211000	3812300	12096000	22492000	20817000	21916000	0	20122000	8100000	8722300	7987500	0	30072000	7705600	54148000	24117000
sp|Q15828|CYTM_HUMAN	41156000	3103600	1278800	179620000	45643000	9204100	54363000	0	15275000	53952000	36076000	92339000	63270000	0	4303500	11778000	11917000	6157000	6631800	5508100	8529500	0	0	45564000	23237000	28766000	7679700
sp|Q9BVM2|DPCD_HUMAN	3491700	5056200	0	17622000	17786000	8996700	43037000	28480000	13211000	5654900	9377700	13615000	4710900	0	3749500	0	9067200	10371000	3831000	1935300	6757000	3210900	1677200	0	8216800	23428000	1552800
sp|Q96GW7|PGCB_HUMAN;sp|O14594|NCAN_HUMAN	38042000	4005300	12153000	19801000	11607000	16481000	30969000	22983000	2710800	7159400	23660000	6115300	0	0	0	0	23066000	5734700	12083000	2992200	10210000	8566900	2578900	4467500	4612900	86205000	2058400
sp|P10586|PTPRF_HUMAN	8341700	0	0	51192000	17312000	63120000	47524000	24994000	33736000	12054000	16197000	30174000	15087000	31878000	15532000	22061000	10401000	10824000	7859000	14128000	8898200	0	0	10546000	11052000	29131000	14342000
sp|Q14974|IMB1_HUMAN	7711500	5897500	0	12252000	9402800	3919500	15802000	32427000	18484000	17075000	3531900	11628000	3022100	18211000	8952200	9306900	39694000	0	2967100	2046600	5883500	0	0	6315700	22994000	15502000	4464600
sp|P11684|UTER_HUMAN	41796000	2254600	14211000	6696000	11953000	29071000	9514700	35488000	22989000	0	18505000	27618000	18694000	0	0	0	4267700	2903600	8059700	6936300	2355000	1712000	5166300	21500000	7122400	7939400	5787100
sp|Q14240|IF4A2_HUMAN;sp|P60842|IF4A1_HUMAN;sp|P38919|IF4A3_HUMAN	0	0	4851700	9108600	13277000	10073000	6079000	4684100	6671600	0	6928900	10023000	8071500	2926900	0	1804200	10391000	5338900	2084900	3453000	7718600	6073400	9067700	1913000	22841000	14303000	3344100
sp|P22392|NDKB_HUMAN;sp|O60361|NDK8_HUMAN	0	15074000	17513000	30063000	25493000	30593000	25409000	20977000	25337000	0	25897000	24061000	24294000	0	0	13138000	6643700	22035000	17042000	18756000	23847000	19359000	19515000	24526000	14034000	23734000	15103000
sp|O00469|PLOD2_HUMAN	6317000	7136700	5895800	22678000	12192000	10045000	4892300	14093000	22066000	17007000	10086000	14658000	12998000	0	2376200	0	2598500	12992000	10768000	3774300	4920600	0	0	19431000	6011400	13184000	2451900
sp|P48637|GSHB_HUMAN	28411000	16556000	22480000	40928000	0	7181400	19342000	19740000	18159000	43708000	17247000	19007000	20420000	0	9131500	5705000	0	17478000	35953000	21175000	18095000	30925000	17416000	0	21898000	25034000	11236000
sp|Q9BR76|COR1B_HUMAN	17987000	19765000	24091000	39450000	20740000	53431000	46503000	12143000	38902000	51939000	17646000	30646000	39727000	0	0	0	0	22895000	40875000	29138000	33924000	32921000	19236000	10539000	15956000	37513000	77330000
sp|Q9Y376|CAB39_HUMAN	4439500	3828900	4152300	3943500	2084100	2968400	3284400	6586800	4204700	11883000	4588100	8592400	0	0	0	10612000	6181600	2639100	0	2214300	3678800	2810500	2418900	940960	5101700	8658400	2083000
sp|Q9BY14|TX101_HUMAN	0	24595000	0	75631000	103210000	14519000	152460000	193290000	8826800	39137000	27528000	73067000	0	25462000	5359800	25614000	34173000	25373000	3244800	4266500	13819000	0	36665000	45871000	37041000	83975000	17830000
sp|Q86X29|LSR_HUMAN	7143900	15944000	8880400	19398000	20687000	88412000	10813000	13626000	0	45380000	11210000	16553000	17102000	7493000	7110000	4067700	11847000	11904000	17553000	12660000	0	0	13122000	12777000	0	12388000	14334000
sp|P26038|MOES_HUMAN	17345000	31096000	0	13657000	0	78907000	16784000	35234000	11650000	17594000	12510000	15670000	9463200	22930000	19545000	13376000	0	0	38083000	18236000	39057000	48754000	52008000	13360000	46335000	60797000	15276000
sp|P34913|HYES_HUMAN	0	0	6228800	155810000	25570000	17995000	7825300	21595000	44829000	13231000	7814600	25816000	33797000	0	11220000	33455000	0	22317000	27557000	12490000	20150000	11632000	33597000	34329000	26896000	22541000	17491000
sp|P02511|CRYAB_HUMAN	8020700	4475500	9601100	34167000	12473000	8743700	10555000	14850000	5010200	10227000	2708800	0	5948200	2625600	0	1876300	0	2121500	5093500	2698400	4010500	5646400	3091600	0	2116500	10317000	2943800
sp|P35080|PROF2_HUMAN	8487300	0	0	24467000	16335000	20788000	14779000	20226000	16723000	29178000	16392000	18154000	28165000	5226100	0	4831400	8228200	11097000	9828700	8106800	11144000	11430000	0	3943800	11949000	16397000	8319100
sp|P63167|DYL1_HUMAN	0	0	46957000	55987000	69231000	61965000	194710000	139680000	11297000	0	20484000	45911000	11319000	5882200	2821300	31496000	51573000	22968000	11365000	14577000	20165000	5358200	4654500	64776000	9124900	156700000	0
sp|P56851|EP3B_HUMAN	398680000	0	27540000	212790000	97014000	154880000	458820000	203150000	35692000	0	145510000	316770000	0	14579000	63561000	35624000	139110000	76614000	269380000	127090000	157130000	236560000	131860000	21006000	45234000	192220000	0
sp|Q8N114|SHSA5_HUMAN	37708000	7597900	76070000	180740000	49822000	62873000	82092000	27476000	90081000	67814000	7942400	34463000	23208000	143250000	20438000	32015000	53333000	0	5345800	7666700	5595200	5548200	0	84624000	8934700	0	0
sp|P12109|CO6A1_HUMAN	9740200	17624000	13119000	9246600	14515000	7284300	12946000	22916000	6201500	0	6374700	20412000	0	2946400	2957300	0	2624300	13011000	8322700	10916000	7710100	6080000	0	7702100	4036300	11113000	15992000
sp|Q7L266|ASGL1_HUMAN	0	0	11030000	60489000	6896300	85700000	234840000	80849000	8152300	2159200	9643200	22432000	1720000	14572000	521110	17930000	124920000	16400000	1638800	0	6098400	8978300	20317000	24960000	12294000	72388000	0
sp|O00764|PDXK_HUMAN	3860000	7352900	7667700	8298400	5848800	6561300	7368300	4152600	7963000	3600700	4047100	5197800	9016000	13717000	21235000	4576100	3110900	0	3331600	4947600	6309100	3382400	3729800	0	7501400	7601800	0
sp|P11216|PYGB_HUMAN	0	11248000	9170700	14196000	16481000	12640000	16653000	4421100	18254000	7246500	3199700	8958100	7438500	1616800	2288400	0	6691900	11415000	9572700	8312800	14731000	7990200	0	10911000	13753000	11408000	6842600
sp|P20336|RAB3A_HUMAN	33817000	18958000	23844000	0	9983700	4493600	0	52268000	59443000	33389000	32646000	31877000	29268000	62627000	17693000	0	19401000	46201000	48169000	67939000	84081000	63944000	97006000	31550000	39118000	54321000	18455000
sp|Q8NEB7|ACRBP_HUMAN	10585000	9388700	21382000	227110000	55160000	79746000	372750000	135230000	25738000	14653000	57000000	38761000	0	66841000	0	39016000	22445000	29542000	15958000	8670000	15879000	3663600	8104400	136170000	1296800	113070000	0
sp|Q9H4B8|DPEP3_HUMAN	3620900	8025700	0	125430000	66653000	45991000	634780000	218830000	17825000	28925000	7086900	15775000	5281300	23013000	4632000	19194000	28366000	12105000	3841700	0	13844000	0	3827100	50391000	4420500	70418000	10780000
sp|P61604|CH10_HUMAN	6760800	4964900	34760000	45290000	35124000	24927000	93034000	79600000	4007200	0	21321000	14423000	0	15635000	2749500	4048000	46963000	11502000	6407200	4939600	7630200	7130100	6030700	19656000	8093800	58274000	0
sp|Q9UHC6|CNTP2_HUMAN	3052200	7307300	3671100	122700000	3502900	23562000	7342200	9866200	13055000	7662700	9179400	4598800	5050200	8900500	0	0	1144000	5459700	14933000	23108000	3173000	5906800	8275800	0	3029100	67352000	3025000
sp|P49368|TCPG_HUMAN	0	0	7957800	34742000	32427000	13744000	27153000	31722000	14434000	9715000	13826000	27090000	19850000	11665000	11182000	6937700	32798000	12734000	7836600	5002000	18003000	11724000	8168100	13596000	15425000	23916000	0
sp|Q12805|FBLN3_HUMAN	12291000	0	16297000	33293000	14586000	7861400	7744200	45457000	19475000	23049000	20627000	62451000	40436000	5592600	0	9006400	3527800	14841000	24937000	12955000	14357000	13425000	18049000	9423100	0	28508000	10799000
sp|Q8NCW5|NNRE_HUMAN	12738000	11140000	18893000	36153000	6114400	11755000	10183000	21917000	17049000	18721000	9882100	20528000	18329000	12826000	11894000	0	22262000	9432900	0	13699000	14070000	13307000	10128000	9313600	9795400	26144000	0
sp|Q58FF8|H90B2_HUMAN	5853400	15433000	7927700	60973000	4491700	36371000	21252000	43888000	20885000	14425000	10411000	19328000	20204000	10117000	5213000	7542100	21546000	0	13761000	0	11526000	11897000	0	6500400	4187500	24114000	8715600
sp|Q16777|H2A2C_HUMAN;sp|Q6FI13|H2A2A_HUMAN;sp|Q99878|H2A1J_HUMAN;sp|Q96KK5|H2A1H_HUMAN;sp|Q9BTM1|H2AJ_HUMAN;sp|P0C0S8|H2A1_HUMAN;sp|Q7L7L0|H2A3_HUMAN	22154000	14227000	84112000	99535000	94429000	104330000	211450000	189170000	58788000	93552000	121380000	299990000	23225000	44680000	0	0	145130000	10490000	0	9399400	36418000	12678000	8859400	111190000	17908000	285400000	6404500
sp|Q14990|ODFP1_HUMAN	9015300	29938000	35501000	38974000	83365000	32815000	75735000	37195000	62419000	12626000	23132000	78685000	12314000	0	19137000	2781800	0	97871000	19874000	3479600	34299000	8226800	0	395010000	19003000	135430000	12108000
sp|P00738|HPT_HUMAN;sp|P00739|HPTR_HUMAN	0	179520	229760000	4097700	1543600	0	6981500	957320	0	2183600	1000900	5871500	2221400	1294900	144290	9340800	112010000	140340000	117100000	197070000	177350000	71555000	359040000	93855000	1953000	77008000	491540
sp|P16070|CD44_HUMAN	0	6727400	20938000	27317000	15118000	5380500	8888800	0	29981000	26709000	15862000	9443000	30797000	25777000	13548000	0	48248000	16154000	8569700	27398000	22489000	9474700	36274000	25562000	7738600	28296000	15379000
sp|Q15257|PTPA_HUMAN	3112100	9445700	2711500	14197000	28052000	5448900	17689000	9550500	0	14438000	9377500	19507000	14589000	23147000	21017000	16199000	42475000	7223400	5281500	0	0	12868000	2836700	11131000	4677100	18192000	7349300
sp|P17987|TCPA_HUMAN	0	0	5938800	19153000	34830000	13972000	18320000	14299000	15510000	10119000	11908000	15738000	8798100	6084600	7790900	0	16872000	17934000	12294000	8338800	10591000	16760000	8217000	5543500	16187000	26094000	7974400
sp|O43692|PI15_HUMAN	0	0	47268000	72103000	9049500	85147000	41584000	41529000	99724000	67814000	20539000	14833000	0	8164700	22552000	37002000	29227000	14214000	16996000	6626300	6117300	8196400	27774000	89708000	34249000	157100000	67050000
sp|P42702|LIFR_HUMAN	21505000	12392000	0	106630000	38015000	18190000	24465000	109270000	81973000	72877000	38384000	17915000	0	5577500	0	11594000	29088000	22764000	22582000	35169000	16468000	25995000	32598000	16676000	7560100	180970000	36813000
sp|P50990|TCPQ_HUMAN	0	4493500	14470000	23960000	11874000	15676000	80029000	22908000	9609200	0	9958200	48131000	0	29025000	10114000	15732000	27567000	8411300	7072800	5887500	9483800	16594000	13414000	16036000	12750000	32374000	4124200
sp|Q9H3G5|CPVL_HUMAN	12481000	12789000	21728000	93257000	69582000	41864000	186220000	69903000	41616000	14669000	17902000	19392000	0	8973000	0	0	20982000	7210300	18140000	5065300	10707000	22616000	14698000	12885000	14223000	144020000	12666000
sp|P63241|IF5A1_HUMAN;sp|Q6IS14|IF5AL_HUMAN;sp|Q9GZV4|IF5A2_HUMAN	6432200	10564000	6478900	25143000	7177900	20888000	7674300	83227000	0	16065000	7405900	9939700	8448000	0	19414000	14214000	33608000	6906700	10971000	11732000	10247000	10143000	8456600	13034000	20335000	23160000	0
sp|P21217|FUT3_HUMAN;sp|Q11128|FUT5_HUMAN	40355000	27497000	13958000	48665000	52599000	33373000	18942000	24989000	9026000	45191000	9572800	25216000	29092000	0	14552000	19976000	10709000	7955600	29655000	0	16469000	5392000	0	25190000	7525200	15739000	19721000
sp|O75976|CBPD_HUMAN	16583000	1235900	0	88457000	24253000	3275400	40347000	9691900	23172000	17028000	3461000	10160000	0	16870000	14886000	0	4149100	2399400	2058100	11279000	2459400	2167200	6835000	2915700	7773500	44775000	13848000
sp|P00352|AL1A1_HUMAN;sp|P05091|ALDH2_HUMAN;sp|P30837|AL1B1_HUMAN;sp|O94788|AL1A2_HUMAN	58846000	37702000	0	106600000	71098000	60387000	189740000	118670000	11178000	71110000	23166000	37642000	35774000	85258000	15680000	19609000	89900000	0	49831000	0	10579000	34879000	36520000	169850000	44717000	63661000	51425000
sp|P36268|GGT2_HUMAN	20096000	7279700	5457500	16705000	0	32048000	29419000	16257000	15807000	7882600	29636000	9849100	10326000	11309000	3754100	0	21968000	10597000	14425000	23398000	40419000	20836000	13614000	9295700	0	39209000	10498000
sp|P41271|NBL1_HUMAN	120200000	53391000	62930000	13786000	0	106560000	93896000	144570000	231460000	0	79581000	257120000	55115000	16441000	0	3491100	7541200	51618000	73979000	103260000	71647000	75503000	205500000	1486700	37861000	197670000	44196000
sp|P62826|RAN_HUMAN	5798100	10562000	8279400	12346000	4318600	13387000	25005000	41174000	11923000	15744000	10946000	20869000	5799100	71423000	13391000	21688000	43822000	4800400	11511000	0	10695000	0	0	50106000	14750000	13541000	10107000
sp|P98095|FBLN2_HUMAN	0	0	7808600	68668000	164220000	27251000	256810000	259250000	13676000	61324000	44000000	19110000	23439000	7372500	3448600	16047000	15602000	20041000	0	16069000	14642000	12193000	9056900	11520000	44138000	60253000	25685000
sp|Q92484|ASM3A_HUMAN	32696000	11952000	17922000	169970000	8531100	14469000	19574000	34663000	68470000	28105000	48298000	54297000	16419000	42996000	45650000	25295000	46619000	0	19635000	0	0	3989500	8873500	156100000	9915600	60997000	52472000
sp|Q6UX06|OLFM4_HUMAN	20872000	14751000	7580700	0	10683000	9579500	75798000	10593000	0	3608000	2268000	3794300	12577000	0	9975600	3771400	26158000	3080400	17516000	17624000	20022000	1694900	12333000	55275000	19504000	17188000	4756000
sp|Q075Z2|BSPH1_HUMAN	10004000	2062100	11301000	45827000	26653000	46467000	62357000	44353000	10450000	10948000	13617000	11727000	6423500	52572000	3601400	21481000	0	0	3155100	2447500	0	23110000	6330900	70488000	3696600	44682000	7904600
sp|Q9NRW1|RAB6B_HUMAN;sp|P20340|RAB6A_HUMAN;sp|Q14964|RB39A_HUMAN	29107000	20934000	33629000	2225900	0	37617000	33349000	52217000	49486000	0	43745000	49374000	48730000	34121000	13340000	24457000	0	62292000	48545000	61320000	73623000	59720000	107420000	48751000	25631000	61696000	76664000
sp|P28799|GRN_HUMAN	22466000	0	16821000	76790000	29368000	11503000	14257000	13202000	14371000	0	3465800	35779000	10155000	2622300	3578000	3652800	2504400	7174200	3498900	7073200	6751400	3537700	6250900	6596400	6875600	16068000	11474000
sp|P05090|APOD_HUMAN	15327000	3264100	15758000	22418000	17079000	17748000	21991000	27289000	29514000	0	10511000	35093000	35301000	3357300	7824100	3213000	8684700	4828000	3986600	5345900	6560900	3211200	674480	11579000	18466000	0	9272400
sp|P68402|PA1B2_HUMAN	11934000	12559000	7194400	10381000	16895000	25448000	6270400	54736000	12197000	9421500	3092700	6309300	7349800	4974300	0	0	7668700	9554000	6329300	11770000	11202000	8545900	11724000	11325000	7069200	14433000	6718400
sp|B9A064|IGLL5_HUMAN;sp|P0CG04|IGLC1_HUMAN	0	3188500	150680000	48738000	52171000	7519200	84552000	9949100	6833200	0	6449700	8878700	14426000	23006000	12079000	13665000	11513000	15907000	69862000	12458000	5576800	8921100	1037500	60994000	103040000	32279000	35487000
sp|P68366|TBA4A_HUMAN	43567000	72774000	12816000	28717000	5098300	29440000	57204000	87173000	37346000	26185000	14635000	62336000	43729000	0	10318000	9331400	21814000	8694900	27348000	5915700	17118000	8129900	13543000	0	18213000	36575000	15784000
sp|P00491|PNPH_HUMAN	0	0	19408000	22282000	16451000	9016500	93373000	31706000	67887000	16866000	19763000	13145000	6477700	15490000	5996700	4863900	39997000	9229200	44475000	11439000	34616000	17131000	9196000	7135700	8861300	47697000	23350000
sp|O15296|LX15B_HUMAN	7338300	627630	1289400	31282000	2878700	6175400	1503900	11982000	63589000	16114000	7999400	8360400	9894900	920990	6882200	1211500	0	8154200	2671800	7433200	1161900	3799800	0	2807800	8286200	8093000	9544200
sp|P09543|CN37_HUMAN	14365000	0	3321100	65470000	15693000	29949000	12041000	27999000	32654000	14097000	20965000	14828000	10854000	20518000	0	5500400	6109100	14608000	8332400	23797000	33882000	12685000	13818000	12175000	13820000	31290000	18885000
sp|P30046|DOPD_HUMAN;sp|A6NHG4|DDTL_HUMAN	13853000	17722000	13208000	66162000	49708000	32884000	41734000	33059000	25302000	9930700	16195000	49228000	39255000	27498000	0	0	33056000	24889000	11485000	20775000	29076000	10664000	19811000	27052000	14877000	35856000	8660000
sp|P02743|SAMP_HUMAN	0	0	34329000	76047000	41863000	31500000	224760000	81577000	16631000	13232000	9275800	34875000	14758000	24825000	3090500	8923400	26246000	28228000	6419000	9479200	16410000	6017900	6824100	32755000	6286500	114700000	7590700
sp|P05156|CFAI_HUMAN;CON__Q32PI4	8022700	6535100	26169000	14752000	10520000	7820600	19396000	16371000	0	8317400	9739200	17200000	0	19558000	4343700	3461700	19718000	5691500	9582400	8678000	12763000	6845500	5660500	8523600	2483900	27398000	9529700
sp|P62879|GBB2_HUMAN;sp|Q9HAV0|GBB4_HUMAN;sp|P16520|GBB3_HUMAN	15636000	20170000	18345000	15453000	15823000	24637000	13714000	18040000	15429000	24195000	13597000	18536000	7131000	20079000	20306000	29675000	0	19074000	19694000	20556000	25477000	21599000	24940000	46255000	12438000	26896000	0
sp|Q99832|TCPH_HUMAN	0	12432000	12050000	15190000	10721000	10283000	33545000	16602000	12229000	10694000	10682000	17081000	11797000	30515000	23402000	24112000	18921000	27638000	11269000	5606000	20866000	16705000	16458000	22651000	19211000	24431000	0
sp|P61006|RAB8A_HUMAN	14260000	18604000	22293000	71187000	39804000	37146000	33038000	61168000	45545000	23402000	21042000	0	25555000	54125000	33939000	0	26872000	22438000	20281000	39509000	66731000	2855800	86585000	22006000	27405000	57070000	19252000
sp|Q9HC38|GLOD4_HUMAN	16102000	13508000	6655300	70182000	47730000	30986000	38732000	55277000	25005000	0	14606000	13960000	32995000	0	10568000	24347000	30473000	13012000	12161000	18692000	15764000	18252000	22850000	21708000	14628000	30748000	14802000
sp|Q9UL46|PSME2_HUMAN	16580000	8088600	9376200	36112000	22964000	41945000	12128000	10712000	14007000	7002400	4352200	10738000	20300000	20855000	20089000	0	0	4939100	6155200	3924800	3527600	4346800	4940900	21701000	14727000	2879000	22331000
sp|Q15435|PP1R7_HUMAN	12649000	15950000	0	25951000	59028000	15865000	38344000	37855000	24968000	16218000	9885600	16142000	17778000	10836000	0	14190000	19075000	13802000	7721700	14311000	12866000	19769000	13160000	15248000	28636000	21278000	11737000
sp|O14786|NRP1_HUMAN	33404000	16591000	21062000	30229000	58119000	33072000	35354000	10324000	7912400	32124000	9546000	25318000	11084000	0	5927600	10239000	9942000	5288500	0	8671200	8649200	3088600	213320	43196000	5146000	14631000	17165000
sp|P49908|SEPP1_HUMAN	11744000	7205300	16347000	36602000	108590000	29542000	36575000	38000000	40255000	42022000	12880000	15634000	0	10483000	21436000	0	43035000	15419000	6286700	47738000	11514000	10613000	13184000	34836000	23683000	46420000	20515000
sp|Q93099|HGD_HUMAN	15627000	12448000	9699800	34869000	12330000	23580000	19061000	20516000	35711000	11396000	15810000	26666000	28485000	16730000	12173000	0	7429900	10384000	19159000	23951000	11533000	14350000	16672000	0	6104700	19755000	10897000
sp|P15586|GNS_HUMAN	13750000	11981000	15649000	40364000	24074000	45516000	21360000	15002000	18210000	17082000	19978000	14167000	11101000	32619000	16651000	0	25966000	30047000	22361000	30146000	24937000	0	26328000	11456000	39008000	16065000	13331000
sp|P61981|1433G_HUMAN	0	14428000	10070000	25939000	12734000	16647000	12994000	18844000	21855000	7223500	9077500	12833000	10460000	0	9094200	10404000	7332100	11140000	9617600	13436000	13340000	8892000	15369000	8006400	15889000	16009000	13317000
sp|Q14894|CRYM_HUMAN	8167300	14481000	6297500	16880000	33789000	18773000	11454000	3157800	11692000	13163000	7200300	5019500	12130000	22812000	13143000	8061400	0	9002800	10723000	26527000	19422000	18766000	29835000	0	6618000	20084000	14678000
sp|P26641|EF1G_HUMAN	5924800	10744000	17017000	19807000	25733000	7975700	79782000	39109000	6015000	0	3112500	13093000	0	27283000	6683400	27699000	25140000	37111000	8993200	3057500	16628000	1490000	3220200	7196400	14621000	53982000	3455500
sp|O14672|ADA10_HUMAN	4496900	7699400	10127000	33414000	17161000	12998000	21294000	11413000	13615000	18201000	14513000	27483000	23204000	198120	6841700	4660400	6694100	4283400	0	23135000	9662300	11233000	7376500	14389000	0	68879000	10044000
sp|Q99985|SEM3C_HUMAN	7895800	7870300	26873000	95388000	34173000	25082000	14475000	28532000	14680000	0	9601600	29649000	52052000	30935000	104230000	0	24066000	16655000	4947600	17269000	9647500	12895000	18122000	12358000	11965000	12500000	47934000
sp|Q53GD3|CTL4_HUMAN	74280000	29145000	0	90419000	0	102880000	144770000	222340000	52094000	39065000	62640000	37885000	51008000	223920000	40859000	19564000	66512000	73366000	78107000	104790000	115400000	33740000	84490000	5433600	25474000	111500000	44051000
sp|P04217|A1BG_HUMAN;CON__Q2KJF1	3047400	0	120970000	62202000	50989000	6912700	127340000	45630000	1814700	16505000	12003000	30919000	13661000	39985000	3608500	151430000	55402000	65032000	36233000	15589000	27614000	0	11606000	130480000	11576000	18788000	17224000
sp|O43291|SPIT2_HUMAN	213330000	858580000	302490000	2293700000	773480000	1627100000	560660000	2433400000	481710000	466230000	921390000	694350000	282680000	24009000	19718000	43724000	0	107690000	171470000	147580000	193200000	152680000	150420000	0	714730000	2057900000	804940000
sp|P34059|GALNS_HUMAN	7930700	11822000	14852000	53799000	6839700	15056000	28691000	11244000	24370000	19403000	9534300	27467000	15281000	33693000	21484000	0	0	5886700	6305800	8694600	5846300	6636000	12582000	12433000	23757000	25161000	11208000
sp|P60900|PSA6_HUMAN	25534000	31531000	24258000	82025000	60975000	46387000	96927000	83038000	21294000	0	34936000	38004000	24530000	17833000	0	26824000	64532000	21793000	14008000	19025000	27780000	18579000	32617000	72603000	9941500	80352000	22715000
sp|P17066|HSP76_HUMAN;sp|P48741|HSP77_HUMAN	62864000	89335000	66837000	193750000	112620000	75842000	265320000	265780000	122900000	7963700	134150000	210260000	87302000	0	0	41751000	165920000	116910000	92454000	74108000	135200000	97486000	107960000	62226000	144160000	226220000	82164000
sp|P50991|TCPD_HUMAN	9110800	10346000	9989300	6857200	14618000	6046800	30007000	20997000	10980000	0	9052300	17910000	0	15944000	5549200	10259000	12666000	11596000	4117900	5940200	16219000	13883000	11746000	10801000	11157000	21535000	4752600
sp|Q6UW15|REG3G_HUMAN	99681000	12955000	26447000	117640000	36521000	14686000	46865000	25610000	4247300	53763000	37739000	24327000	9786400	0	41959000	12835000	15338000	9965600	25667000	5088900	0	46238000	6455200	57900000	11553000	35263000	30968000
sp|Q9BUD6|SPON2_HUMAN	15449000	33676000	31232000	141760000	79868000	32451000	23942000	100080000	57495000	60407000	53416000	19233000	0	38948000	98299000	0	61857000	31823000	10108000	144290000	50223000	23784000	42501000	179030000	58169000	48825000	112660000
sp|P35527|K1C9_HUMAN;CON__P35527;sp|Q99456|K1C12_HUMAN;CON__Q99456	61757000	39207000	19298000	139640000	34448000	8243000	4626400	11275000	7164900	0	143710000	35023000	246980000	19241000	12788000	11201000	332250000	18983000	51931000	47716000	24856000	32621000	86989000	459740	14510000	31181000	0
sp|Q96DA0|ZG16B_HUMAN	32772000	34453000	37526000	29745000	15973000	178480000	71794000	68363000	11122000	14563000	8927300	102520000	8874700	79692000	6902000	93699000	16297000	123820000	52066000	54818000	130310000	73207000	62993000	0	22751000	8540800	0
sp|Q96PH6|DB118_HUMAN	28262000	22043000	31787000	63474000	18141000	138860000	187800000	114900000	31000000	54288000	29777000	70244000	30557000	49151000	8512600	5549100	116530000	15282000	14250000	11468000	25194000	0	43471000	27186000	12664000	77353000	10179000
sp|P31946|1433B_HUMAN	10635000	9009300	12222000	18677000	14282000	10746000	13666000	23312000	8115300	13689000	22347000	28253000	35286000	0	3565800	11917000	8003100	10084000	8349900	8888400	12988000	17996000	13458000	7266000	21188000	18328000	11305000
sp|O75369|FLNB_HUMAN;sp|Q14315|FLNC_HUMAN	10724000	9303900	9006400	28587000	8311900	10511000	16809000	11751000	13009000	9369400	4586900	0	10758000	10145000	6490700	3385800	6941800	10117000	12851000	15575000	9016700	7947900	2278700	4424700	7156900	14579000	6529100
sp|P30153|2AAA_HUMAN;sp|P30154|2AAB_HUMAN	10670000	15695000	6290000	17498000	25117000	15468000	31901000	23452000	41850000	39476000	8070000	23987000	22094000	28628000	34488000	15826000	13983000	0	14358000	12579000	23336000	10320000	16439000	17004000	14630000	35872000	27396000
sp|P18669|PGAM1_HUMAN;sp|Q8N0Y7|PGAM4_HUMAN	0	39027000	40331000	35660000	77365000	29078000	60898000	59283000	39903000	48515000	20786000	63082000	121040000	28233000	22293000	24095000	22298000	14469000	28041000	15135000	33288000	31907000	16185000	23859000	18946000	44562000	86416000
sp|Q9NS25|SPNXB_HUMAN	20436000	9231000	53883000	407350000	134290000	114420000	258900000	570470000	37755000	27918000	61401000	99102000	18317000	83039000	6881700	72762000	423810000	90415000	40204000	0	27402000	11352000	21083000	18035000	10686000	512760000	5286100
sp|P84243|H33_HUMAN;sp|Q6NXT2|H3C_HUMAN	731850	23583000	16988000	136800000	122610000	44136000	759780000	316970000	53182000	27830000	8184800	28825000	1918300	38810000	2481400	22059000	139740000	14713000	5826700	6305600	11870000	6322000	0	78232000	80535000	106010000	4354700
sp|O95994|AGR2_HUMAN	29752000	66982000	13137000	14075000	29549000	15545000	7945600	7280900	25283000	30679000	5672600	54473000	63260000	35360000	11027000	2894400	8762500	2994300	13594000	0	14409000	11448000	7893700	68026000	38856000	6871600	42732000
sp|O94760|DDAH1_HUMAN	14504000	7052700	17565000	19471000	25463000	15649000	7370900	10826000	18082000	7894200	15100000	17187000	16632000	47850000	0	10852000	9575000	10217000	8821000	21688000	8577500	15520000	17040000	15345000	9838200	11303000	6079800
sp|Q8NHP8|PLBL2_HUMAN	11990000	11391000	10427000	54365000	11108000	23639000	21549000	22692000	20451000	33893000	17818000	18583000	8480700	0	17888000	7818100	24208000	12171000	8683300	21847000	12296000	15929000	7515500	29169000	21002000	19922000	18229000
sp|P29401|TKT_HUMAN	7387100	8125600	13511000	10489000	9923500	8822900	173910000	17251000	7467800	0	3225600	8216300	16639000	19684000	7883900	3796500	7190300	10093000	11787000	9624800	8663200	13286000	22499000	22102000	64099000	19861000	7312600
sp|P52788|SPSY_HUMAN	29356000	17265000	8944400	41884000	27970000	43527000	15367000	28841000	62939000	26848000	21800000	49914000	38110000	25690000	35716000	12462000	0	32079000	11465000	17148000	20453000	11179000	45373000	17604000	17428000	42778000	21839000
sp|P01860|IGHG3_HUMAN	31750000	22267000	119770000	37725000	132170000	43490000	145180000	36499000	26770000	19725000	66512000	81823000	79161000	6951100	0	31362000	3974300	54477000	360660000	33290000	36174000	32362000	55354000	140940000	85012000	234620000	20283000
sp|P10323|ACRO_HUMAN	5629300	6701600	32432000	294500000	106970000	92442000	659160000	386340000	27846000	10241000	57054000	45485000	6015300	21801000	250920	27756000	44512000	24653000	13917000	5953100	15045000	3459600	2054800	83092000	1737400	188040000	0
sp|Q9BWD1|THIC_HUMAN	26151000	21272000	12755000	142290000	37046000	34685000	12106000	24781000	58786000	34753000	33374000	76232000	49996000	42867000	69733000	80780000	79164000	33674000	15672000	29753000	27450000	25097000	30402000	0	12216000	29203000	28418000
sp|P09972|ALDOC_HUMAN	22699000	28238000	24017000	37641000	35056000	68627000	62989000	43751000	21369000	22099000	9743200	29850000	31595000	22274000	10763000	54788000	38407000	31054000	20540000	27926000	19597000	22422000	2469000	0	22654000	31542000	6916600
sp|P02652|APOA2_HUMAN	9642400	4224400	404760000	6007900	5380100	3982100	9725600	2797200	6080900	3571000	0	18504000	8552500	10838000	798340	15747000	1818200	7243300	11608000	16869000	12993000	5573700	13043000	141210000	13432000	7008900	9276000
sp|Q9H4G4|GAPR1_HUMAN	13808000	0	13371000	70908000	49193000	45423000	29837000	31762000	30188000	27213000	29825000	21861000	22817000	48310000	12709000	10252000	22411000	14745000	36533000	33794000	19198000	11184000	13175000	21638000	22040000	38082000	22782000
sp|Q9HC84|MUC5B_HUMAN;sp|P98088|MUC5A_HUMAN;sp|Q02817|MUC2_HUMAN	623100	58979000	3327100	2465900	31228000	1029500	75076000	52723000	35414000	1820700	7240100	96521000	2527500	57715000	0	219660000	24756000	86165000	29580000	21289000	46740000	24115000	1100500	6910000	98600000	6400600	912860
sp|O43286|B4GT5_HUMAN	58225000	70713000	44706000	200530000	1471800	61043000	214790000	110210000	38895000	36161000	18108000	35669000	22265000	32006000	23242000	0	28228000	41203000	66400000	28437000	53532000	30854000	18296000	98104000	25555000	43862000	79221000
sp|P25789|PSA4_HUMAN	0	17811000	16390000	35774000	18278000	38021000	100930000	47775000	16266000	22852000	19174000	23694000	22038000	19340000	13396000	17346000	57875000	20550000	14276000	5140300	54335000	25424000	9740600	9633500	13103000	36189000	9315800
sp|Q15907|RB11B_HUMAN	16591000	19685000	16341000	48836000	22229000	20746000	27796000	25669000	21613000	4410500	25356000	41798000	24061000	8775400	11657000	0	15348000	14100000	49717000	17244000	31305000	22622000	24330000	11985000	14183000	28911000	10483000
sp|Q9BTY2|FUCO2_HUMAN	16343000	14673000	11945000	66729000	9830200	36718000	15070000	30627000	6478400	34333000	6942500	21991000	10905000	10653000	1432500	6055500	3585400	32096000	28677000	10522000	16330000	4369800	7295600	9981400	0	15854000	8502200
sp|Q16270|IBP7_HUMAN	3620300	6158800	8759800	16197000	5469100	6855800	11349000	13747000	8628100	15074000	7593600	7886300	12673000	2538500	1447100	5109600	2017700	2872600	4302100	1904100	3748000	1797400	3063500	0	4231200	15535000	6133200
sp|P61204|ARF3_HUMAN;sp|P84077|ARF1_HUMAN;sp|P84085|ARF5_HUMAN	8787500	17985000	10145000	5946300	4620300	7459200	14997000	26779000	20719000	9123800	9056600	9975900	7277200	0	5518900	14792000	3972000	20044000	10662000	22067000	30031000	23625000	12003000	9158200	16639000	23952000	4388800
sp|P05060|SCG1_HUMAN	8038500	6790000	17596000	36454000	26193000	18727000	15014000	38548000	6336400	20623000	11104000	89353000	14425000	2749600	5939100	8894800	1056800	0	9738800	6621600	5690900	1833300	1501000	24830000	9155400	23930000	3116500
sp|P29622|KAIN_HUMAN	4769600	10174000	3636400	33286000	29939000	24248000	101170000	18180000	19566000	18159000	12372000	66059000	16524000	18313000	11949000	3082200	9124500	7978200	9600900	6119600	6368000	4150800	0	13308000	10960000	150270000	28093000
sp|P52209|6PGD_HUMAN	15451000	13241000	13840000	30764000	28913000	20553000	80090000	30250000	22290000	8813500	11763000	22294000	19483000	12526000	12476000	26038000	29131000	19474000	10135000	6026400	18633000	13942000	8871200	0	30753000	27150000	7388500
sp|O00292|LFTY2_HUMAN;sp|O75610|LFTY1_HUMAN	15159000	8696500	18354000	16198000	9882100	42075000	22137000	25919000	3092200	30530000	7778700	3808300	3533600	0	12943000	29077000	67209000	5323800	7892300	3309800	5556500	6808300	12361000	18234000	1770900	14256000	6008600
sp|P36873|PP1G_HUMAN;sp|P62140|PP1B_HUMAN;sp|P62136|PP1A_HUMAN	8593400	5138100	25157000	22409000	6453300	6643200	44819000	16793000	21189000	9296700	4838700	7000700	6126600	9086600	7055200	0	2800900	8793400	5724500	4115200	7279800	6269900	4997600	6981900	10655000	17750000	5007000
sp|Q9UBR2|CATZ_HUMAN	0	24806000	17261000	46421000	25825000	31250000	22542000	19113000	22230000	43160000	23816000	34646000	46414000	16089000	12745000	12550000	12562000	18866000	15928000	22956000	36126000	16017000	8890600	12943000	12215000	21171000	18808000
sp|P01861|IGHG4_HUMAN	57351000	78456000	840680000	312050000	122430000	153030000	202680000	36689000	16540000	16702000	31123000	50974000	238090000	44672000	0	58784000	39536000	122090000	49606000	8079700	13662000	28449000	87016000	4858100	94049000	396650000	190730000
sp|O60701|UGDH_HUMAN	2942000	9922200	13371000	47059000	10241000	11526000	15316000	9315900	28294000	11455000	11055000	7956300	6858900	14444000	2428700	1990100	11148000	8971800	5736700	9306400	12774000	7306200	12013000	0	19142000	8571200	8834400
sp|O75969|AKAP3_HUMAN	6663400	4210400	5174600	24047000	9183200	7444400	166880000	39851000	23848000	10146000	5019900	9489000	7220900	7382400	0	4340900	6868800	18149000	8043400	1416000	18009000	3760900	1881900	45632000	5453700	102530000	2718700
sp|P15907|SIAT1_HUMAN	8226100	4523500	5148500	37573000	4824400	16527000	6590600	15465000	5737500	14778000	8196400	34661000	5698900	10106000	0	3662600	1970700	6302300	5903400	13685000	15775000	4057700	3203400	1273600	4173000	8227800	6554600
sp|P40189|IL6RB_HUMAN	0	20349000	27469000	45110000	15235000	30317000	24712000	14671000	18740000	11598000	23868000	11951000	11473000	23168000	18596000	19654000	6273100	15632000	20222000	21250000	17156000	10663000	10027000	18270000	10315000	21688000	11784000
sp|Q9Y5Z4|HEBP2_HUMAN	10460000	16771000	12909000	28203000	78436000	25217000	12112000	14528000	31973000	25842000	19104000	26111000	29987000	27800000	21022000	73171000	0	15033000	14466000	24121000	25234000	14945000	31152000	17649000	20852000	36878000	16739000
sp|Q86VP6|CAND1_HUMAN;sp|O75155|CAND2_HUMAN	6558400	9741600	5026000	20092000	9533900	20322000	70674000	54850000	20762000	16197000	5463600	21426000	2337300	6938400	0	13524000	36284000	11224000	6678800	2016900	11029000	9409800	6348600	14391000	9977200	43809000	8447500
sp|Q92743|HTRA1_HUMAN	11669000	11559000	10830000	50422000	15434000	98310000	39015000	21594000	13439000	19257000	6367100	14745000	4037700	5246800	0	3075400	7338700	1895500	14868000	4099200	5517400	14654000	9896500	13304000	10540000	47793000	2870600
sp|Q15084|PDIA6_HUMAN	31023000	43911000	10027000	65419000	61189000	61408000	177100000	112280000	29501000	37190000	10963000	54645000	21641000	38164000	38025000	54176000	152200000	14803000	10067000	8301600	14992000	7221300	0	33834000	44970000	135980000	36364000
sp|Q8IZP9|AGRG2_HUMAN	21976000	32434000	26511000	191000000	123890000	107500000	98591000	102200000	22616000	112800000	34975000	105720000	17789000	16479000	17381000	76019000	126530000	35000000	62451000	47819000	44984000	0	58610000	100580000	10553000	92159000	22252000
sp|Q96BH3|ESPB1_HUMAN	44218000	76799000	139390000	345910000	0	143080000	430870000	148420000	76178000	173410000	186700000	78398000	46344000	133040000	58345000	67327000	132810000	20352000	43146000	28092000	98269000	153310000	89952000	224250000	25034000	401780000	24960000
sp|Q9BRK5|CAB45_HUMAN	49146000	83009000	29691000	260550000	111610000	82914000	65750000	93299000	33496000	35533000	24199000	63883000	36400000	0	46223000	59107000	31791000	14007000	26266000	8122600	9943000	13673000	3936800	83620000	24049000	37898000	65152000
sp|Q9UNW1|MINP1_HUMAN	28895000	44397000	27169000	82555000	57796000	28982000	76875000	39122000	34997000	64546000	17760000	39315000	25131000	29956000	41537000	55091000	51090000	13412000	9870800	8713400	4233200	10921000	0	60996000	11140000	32553000	25325000
sp|Q96JG6|VPS50_HUMAN	9207300	18377000	0	12087000000	4076700000	4010600000	9511500000	4003600000	618340000	6234900000	663630000	2217600000	1754200000	5498500000	3122200000	21872000000	6201600000	6927700000	1250600000	3584000000	797430000	215250000	34629000	8356400000	5177500000	1963500000	1138700000
sp|O00423|EMAL1_HUMAN	97583000	0	6424800	1175700000	594790000	557580000	374720000	631690000	36190000	462680000	29398000	228520000	235120000	22929000	21524000	70647000	246240000	101330000	40820000	234060000	58099000	164270000	23098000	114950000	64732000	199340000	189360000
sp|C9JRZ8|AK1BF_HUMAN	83315000	61499000	20837000	33118000	80694000	41569000	18359000	45425000	0	37718000	14263000	77471000	67002000	29547000	13748000	11761000	5340600	13340000	26679000	6778600	25083000	7161300	16277000	40766000	40981000	14092000	62832000
sp|P17931|LEG3_HUMAN	15525000	9263300	20174000	41354000	13903000	22228000	20298000	15071000	9470200	8313100	5100800	17312000	17603000	14872000	0	6527500	6233000	8039400	15208000	15472000	13013000	10660000	10341000	4064700	9085900	14134000	8743100
sp|P08133|ANXA6_HUMAN	9920500	11023000	12724000	10759000	11471000	22464000	13869000	13603000	11297000	15165000	4872100	11569000	19153000	19384000	13496000	39484000	8700100	9772700	9475800	11185000	9084300	6321500	6589700	0	28489000	11081000	8494400
sp|P10599|THIO_HUMAN	27047000	15761000	17449000	63140000	55138000	35028000	48860000	60746000	45667000	0	39640000	43413000	44115000	54173000	20986000	28446000	36476000	31090000	27669000	24281000	42540000	22048000	40728000	65889000	65817000	74788000	7110800
sp|P12110|CO6A2_HUMAN	50978000	11453000	23387000	25440000	4698000	7437800	45682000	52161000	16908000	11975000	15233000	78567000	25875000	3646700	8479000	41605000	15480000	31616000	6319000	17319000	24007000	13025000	17771000	0	8154000	25341000	63860000
sp|P07711|CATL1_HUMAN	63707000	69152000	85558000	111980000	67643000	106920000	104330000	85708000	47753000	90715000	39977000	94489000	50161000	30644000	40619000	42106000	37989000	11315000	103550000	73670000	0	22676000	33001000	94129000	50446000	121630000	46789000
sp|Q13228|SBP1_HUMAN	22833000	38249000	23750000	46512000	67531000	90946000	37027000	31061000	29870000	25299000	7365100	8854100	30480000	27812000	29406000	0	27609000	23278000	12532000	25678000	23329000	19707000	16892000	31705000	34945000	61932000	35796000
sp|Q06828|FMOD_HUMAN	51266000	34560000	38265000	121170000	27759000	127150000	67135000	102080000	155090000	31632000	14593000	81011000	67392000	44153000	53644000	0	66182000	19854000	27291000	47568000	59921000	13993000	8103400	54101000	46918000	50633000	36983000
sp|Q06323|PSME1_HUMAN	9749800	13336000	21017000	25028000	17977000	11655000	28100000	17465000	12477000	16752000	9093400	24503000	15487000	0	19678000	8787500	24402000	10452000	8764500	7246900	8760900	10091000	9145200	24351000	27098000	21441000	24035000
sp|Q9H336|CRLD1_HUMAN	11292000	15742000	14401000	62315000	64885000	48101000	28726000	49270000	8674800	38051000	7219900	16313000	0	13656000	4644300	7950000	39948000	13005000	12856000	17842000	6581600	16353000	5881800	16687000	5661500	89554000	46115000
sp|P01591|IGJ_HUMAN	25279000	8783500	38884000	5529000	18005000	11910000	80263000	10666000	3100700	0	13693000	22665000	20813000	24476000	6483200	4081200	10326000	5719900	15121000	21941000	6167100	6350400	17315000	50715000	42789000	51484000	6724700
sp|P01023|A2MG_HUMAN;CON__ENSEMBL:ENSBTAP00000024146;sp|P20742|PZP_HUMAN	0	929750	133730000	63402000	23187000	23617000	91993000	25883000	1196200	4877700	5278100	11917000	429810	26828000	8076700	54890000	83766000	57539000	8717600	2623800	4502100	2175900	3152600	26199000	12736000	43728000	1564000
sp|P48745|CCN3_HUMAN	31992000	10617000	24877000	39473000	6714800	36002000	52530000	44468000	14641000	0	14167000	20432000	86364000	42158000	5967800	9674700	39755000	15118000	41272000	6387100	22427000	29323000	14728000	24781000	8066800	13694000	23202000
sp|P53396|ACLY_HUMAN	27719000	88874000	10370000	33097000	54788000	48293000	47683000	45630000	43343000	40247000	25712000	88490000	52033000	20822000	24498000	21487000	26240000	27224000	25278000	22552000	29665000	26511000	26130000	0	35678000	37440000	20845000
sp|P54108|CRIS3_HUMAN	119050000	77064000	15924000	169010000	88046000	33690000	128130000	85150000	19779000	57021000	11790000	66553000	22501000	57989000	144760000	19445000	119390000	4991800	7117700	52961000	10176000	8100000	0	18193000	66804000	58389000	135900000
sp|Q13162|PRDX4_HUMAN	24463000	0	26780000	44826000	42384000	43768000	89686000	82455000	45545000	44066000	15063000	44983000	9291800	34143000	20844000	71179000	159970000	46069000	17297000	25607000	8822700	22244000	16427000	143530000	29319000	86264000	10999000
sp|Q96A08|H2B1A_HUMAN	57171000	139050000	83647000	99782000	107170000	321320000	733910000	561480000	188290000	0	443230000	480930000	52817000	131590000	735410	510030000	249220000	94224000	80884000	114080000	195910000	190940000	144550000	326320000	375510000	585980000	29969000
sp|Q96S96|PEBP4_HUMAN	51785000	46866000	152800000	272750000	207200000	253400000	65911000	426010000	169890000	96844000	178150000	186880000	0	137460000	53853000	39272000	168740000	24901000	46542000	112960000	86711000	95192000	53089000	155210000	76655000	353530000	103310000
sp|P28838|AMPL_HUMAN	8570400	8378800	6048600	13033000	29200000	42123000	27372000	13860000	12323000	9692100	5784600	14397000	6913700	14425000	8702100	11787000	34345000	8899400	6983300	14068000	14024000	9862800	8387800	6158700	8331200	23048000	11800000
sp|P49721|PSB2_HUMAN	8747600	12464000	14818000	10758000	10725000	18054000	23328000	18190000	14123000	10202000	6552800	21767000	10924000	9722200	10094000	23609000	15927000	12343000	6387100	6236700	6953300	8998400	4568400	38501000	3578700	28819000	12192000
sp|P11766|ADHX_HUMAN	16866000	20421000	33483000	76894000	46653000	25764000	52130000	171090000	32855000	23418000	23778000	38230000	27081000	48679000	15805000	16785000	25872000	25282000	40731000	44329000	59079000	47414000	53358000	35566000	23862000	43888000	24149000
sp|P62805|H4_HUMAN	14088000	16937000	101850000	114150000	90892000	42209000	438690000	312150000	49449000	14071000	62726000	115280000	33774000	82049000	1404700	14717000	89158000	14648000	10373000	15151000	27569000	14227000	9865600	7900300	165560000	122600000	3428000
sp|P25787|PSA2_HUMAN	18256000	23256000	24429000	47524000	18177000	22111000	70618000	46245000	15289000	23411000	24178000	34842000	13434000	88904000	31184000	22300000	88483000	16645000	1036800	12501000	19444000	18809000	18870000	24654000	15210000	39125000	11236000
sp|P07205|PGK2_HUMAN	11503000	11708000	42333000	77753000	123690000	32007000	296270000	131340000	33546000	25760000	33564000	43188000	1797800	60943000	7499600	58279000	122200000	62383000	20910000	6436100	29677000	11262000	2339900	142200000	28718000	166810000	636750
sp|P17174|AATC_HUMAN	27228000	14359000	8129700	57322000	22598000	57136000	126120000	72672000	20234000	18048000	18768000	41559000	19059000	68433000	26027000	24081000	199850000	12893000	8456700	1134900	9824200	9273300	8970100	75169000	12130000	61708000	9875500
sp|P30085|KCY_HUMAN	7765200	6867900	6174100	24851000	11034000	12694000	12722000	26328000	10945000	6597200	7063700	17043000	9397800	5401200	7438400	5457800	4019100	7064400	12297000	2154500	13997000	13266000	18881000	6677000	6324900	9693400	6972300
sp|Q99574|NEUS_HUMAN	12549000	29182000	8449000	34128000	17372000	56815000	65038000	41390000	21144000	30999000	11014000	7838500	21725000	33190000	18043000	11761000	1125400	21487000	28492000	27265000	50773000	18767000	33310000	28729000	12536000	18208000	18893000
sp|P58499|FAM3B_HUMAN	50446000	67762000	19490000	93652000	54475000	87836000	79584000	95521000	55994000	37475000	67678000	101900000	52360000	85873000	29538000	52866000	46582000	31008000	58917000	47958000	51507000	22030000	10720000	131280000	42946000	64505000	42960000
sp|P61224|RAP1B_HUMAN;sp|P62834|RAP1A_HUMAN;sp|A6NIZ1|RP1BL_HUMAN	20219000	10631000	8111400	32867000	10439000	31909000	10740000	21947000	28257000	24545000	7992600	13601000	9506700	43177000	8022500	5163900	11591000	9256700	9055200	19292000	13907000	14860000	9325200	25375000	47595000	14990000	16245000
sp|P16278|BGAL_HUMAN	14966000	20441000	21108000	64386000	120900000	48079000	82135000	73399000	10848000	17117000	24669000	63500000	22471000	20095000	10865000	34722000	54896000	15436000	14036000	7851400	18642000	11026000	8969500	66254000	20940000	68612000	17185000
sp|Q8WVQ1|CANT1_HUMAN	38338000	32449000	35187000	57843000	27975000	31712000	51748000	55649000	40836000	56133000	27928000	44189000	25722000	52551000	31019000	38713000	48836000	35524000	46843000	57037000	42884000	24500000	46810000	26758000	21188000	30248000	30515000
sp|O75503|CLN5_HUMAN	24259000	15797000	18815000	27339000	63296000	127810000	84697000	69643000	22577000	26217000	13169000	27344000	22150000	33438000	50609000	23246000	22257000	36687000	46859000	32943000	40208000	31015000	48068000	22379000	6071100	43377000	46067000
sp|P00918|CAH2_HUMAN	59259000	61925000	25489000	47263000	80425000	34536000	85096000	45318000	25691000	36794000	20429000	45510000	59838000	99698000	55554000	16247000	53153000	16080000	20147000	11265000	24296000	10490000	8976000	101530000	49475000	60839000	46257000
sp|P35237|SPB6_HUMAN;sp|P50452|SPB8_HUMAN	20004000	46527000	17040000	54498000	26396000	25782000	48372000	54755000	31597000	17887000	20640000	21978000	20167000	23092000	11211000	13056000	85647000	38986000	25492000	35005000	32567000	22810000	26319000	42970000	26582000	28717000	17065000
sp|Q00610|CLH1_HUMAN;sp|P53675|CLH2_HUMAN	6614400	11254000	9347500	10431000	9994600	9137300	31589000	18534000	12552000	6619300	5548700	16910000	6673600	17194000	9576300	8393700	25771000	16697000	10261000	8495800	23903000	18028000	7393100	3047700	13258000	25355000	5915800
sp|Q6UXI9|NPNT_HUMAN	30843000	16116000	38557000	63848000	29002000	34182000	36990000	64766000	63207000	35877000	25988000	87304000	56034000	14771000	12386000	30572000	12702000	29644000	23266000	80662000	25856000	25886000	18885000	14550000	10261000	49314000	41157000
sp|P52565|GDIR1_HUMAN	33275000	81233000	31858000	113980000	66078000	59347000	42061000	117030000	101730000	62098000	34687000	64421000	73594000	20321000	38551000	30295000	29109000	21749000	15100000	46387000	44641000	19537000	9119400	38925000	80265000	64489000	36817000
sp|Q6NT32|EST5A_HUMAN	84242000	29027000	5819400	133630000	138470000	72294000	352720000	138420000	9121500	45988000	41916000	11787000	4866900	24322000	38460000	29507000	79398000	8579200	4104100	14170000	19627000	52712000	13088000	15946000	46015000	73718000	32777000
sp|Q6YHK3|CD109_HUMAN	54211000	19076000	25557000	291220000	36549000	63806000	75402000	70300000	87299000	11293000	39615000	116080000	64764000	159650000	35792000	68486000	51180000	55797000	48375000	47412000	19175000	21545000	50126000	45189000	40377000	140120000	39867000
sp|P29218|IMPA1_HUMAN	10990000	7976000	31167000	58440000	83338000	50755000	293480000	149350000	11716000	20126000	18866000	64542000	12664000	73317000	3461400	41612000	123340000	28971000	16251000	6796300	22181000	12043000	8660800	37077000	15945000	100880000	2751700
sp|P07108|ACBP_HUMAN	56620000	45293000	48596000	193670000	115110000	89241000	72968000	114500000	61751000	61429000	34795000	102040000	49401000	178790000	85118000	39086000	138520000	24779000	38736000	47656000	37502000	36693000	66286000	45545000	34134000	111780000	33302000
sp|P42785|PCP_HUMAN	22179000	31438000	20429000	73495000	99613000	62043000	43619000	82526000	25849000	48694000	16182000	32265000	37413000	15333000	7220100	11464000	23253000	24794000	16477000	18575000	31276000	11967000	7467500	76874000	19170000	41152000	24000000
sp|Q9NR99|MXRA5_HUMAN	31083000	40240000	85093000	58352000	74227000	49207000	50274000	88986000	21869000	72613000	27969000	35466000	64572000	24378000	12016000	20904000	8504100	22604000	43904000	19399000	40437000	4629200	9916700	63936000	30028000	58040000	72731000
sp|P54289|CA2D1_HUMAN	5700500	10374000	8487300	60233000	10829000	18503000	30799000	54276000	17038000	35460000	21238000	27280000	34240000	53632000	39010000	46142000	19499000	19257000	17913000	56596000	11514000	12342000	42552000	27732000	12895000	26718000	14496000
sp|P06396|GELS_HUMAN;CON__Q3SX14	21561000	17578000	56553000	66689000	43351000	39638000	66119000	35948000	8334500	10032000	11896000	27765000	32607000	4384000	21974000	35862000	21989000	11247000	14910000	12185000	13312000	8225400	5324100	16879000	117120000	41362000	16665000
sp|P20337|RAB3B_HUMAN	46482000	38377000	38332000	84292000	33945000	60667000	52754000	103510000	122190000	48243000	52244000	79183000	63086000	48241000	25872000	45375000	98357000	96082000	41749000	81801000	68508000	38415000	57417000	95854000	37107000	74382000	48414000
sp|Q7Z4W1|DCXR_HUMAN	103620000	85555000	53861000	213620000	144580000	125900000	132350000	167570000	137450000	162000000	159290000	189000000	143200000	76639000	24279000	39969000	16281000	97946000	94089000	153200000	121480000	163910000	130910000	68512000	69421000	127130000	61922000
sp|Q13217|DNJC3_HUMAN	6172000	23193000	4911500	112090000	19213000	36243000	15571000	78454000	29481000	11833000	7705600	46782000	16610000	26726000	29073000	61492000	8697900	10156000	14295000	11896000	17845000	4393400	4314300	87965000	9588100	19808000	53795000
sp|O60635|TSN1_HUMAN	166480000	48102000	94939000	1547500000	168010000	87561000	91843000	450090000	253240000	169280000	37041000	117630000	69063000	1093300000	224530000	582720000	309480000	118540000	11809000	355070000	175470000	65676000	11229000	454520000	61934000	211550000	246040000
sp|O94985|CSTN1_HUMAN	40591000	30952000	50885000	107230000	25566000	51063000	44953000	63356000	42263000	52100000	39262000	48486000	38055000	22392000	56877000	53846000	121290000	31554000	27875000	38290000	41712000	17697000	27971000	5448400	11604000	54880000	39425000
sp|P00390|GSHR_HUMAN	14234000	16808000	20386000	37154000	20114000	31404000	23537000	29903000	20151000	10080000	47179000	46268000	27871000	35277000	13774000	4436100	26470000	15781000	29545000	31186000	36054000	31590000	32291000	16520000	20039000	22165000	15653000
sp|P00441|SODC_HUMAN	24987000	253900000	58638000	1308300000	430860000	188490000	696730000	382640000	218460000	322930000	70701000	258840000	232750000	347950000	215550000	83780000	644350000	72429000	77610000	111610000	121210000	69523000	111970000	357240000	179790000	249890000	68298000
sp|P02765|FETUA_HUMAN;CON__P12763	72766000	27222000	337020000	42064000	21816000	22320000	133200000	14817000	21777000	69961000	20215000	65860000	31901000	14438000	42535000	59950000	9532900	74806000	46802000	104050000	104600000	55648000	99524000	67445000	37285000	64678000	43549000
sp|P06744|G6PI_HUMAN;sp|Q8N196|SIX5_HUMAN	4482700	37309000	59334000	125030000	102040000	38371000	221400000	109910000	40050000	19500000	80232000	64527000	65594000	65915000	18920000	27969000	134610000	74503000	43291000	37320000	68581000	45365000	48827000	87772000	62852000	152130000	22534000
sp|P07237|PDIA1_HUMAN	18905000	46123000	16307000	67159000	36656000	26774000	63405000	50482000	28109000	29061000	10698000	61191000	35552000	6498000	36756000	30818000	56873000	15952000	15141000	8030600	9807800	15104000	6421600	86845000	37983000	29317000	23335000
sp|P09668|CATH_HUMAN	4928700	38209000	29372000	31576000	33663000	64875000	17987000	22915000	33879000	42306000	41476000	37173000	27779000	26482000	12555000	3743000	15287000	7324800	9202200	27407000	27798000	16162000	4961200	9851000	7160800	37553000	11843000
sp|P13473|LAMP2_HUMAN	49786000	104280000	24038000	86130000	96442000	40030000	99211000	89030000	51792000	83312000	50086000	79036000	41125000	107300000	88559000	43652000	53868000	38856000	74601000	138400000	47869000	46382000	46186000	88815000	103480000	68813000	87572000
sp|P13489|RINI_HUMAN	12584000	8719500	7669600	35562000	20950000	21229000	65818000	23658000	58994000	26638000	10432000	16834000	29464000	13872000	24116000	7717500	77813000	22310000	8484400	11902000	13774000	11508000	6628700	12350000	22447000	34037000	18334000
sp|P13639|EF2_HUMAN;sp|Q15029|U5S1_HUMAN	9347000	13207000	15181000	74335000	35113000	35194000	94778000	67059000	73132000	14940000	24559000	41261000	45439000	83278000	71965000	65328000	124410000	33700000	13642000	17527000	34459000	17195000	23698000	23031000	41635000	61627000	22209000
sp|P22314|UBA1_HUMAN	33731000	27700000	31138000	69408000	36825000	37817000	67132000	44092000	45083000	24015000	23863000	39213000	33232000	36315000	12385000	58169000	65031000	39851000	27109000	24959000	37603000	35150000	19364000	110220000	42431000	49981000	19719000
sp|P35579|MYH9_HUMAN;sp|P35749|MYH11_HUMAN;sp|Q7Z406|MYH14_HUMAN	14417000	26958000	32025000	72260000	35583000	43182000	65675000	30194000	38939000	40623000	10438000	29186000	38494000	25821000	26880000	46305000	21870000	21348000	13403000	9445200	20511000	21269000	14253000	10714000	116950000	34409000	28887000
sp|P61019|RAB2A_HUMAN	11725000	24989000	47065000	144080000	20340000	45192000	117200000	89156000	33417000	10335000	45260000	49476000	57035000	8086600	17417000	3636600	39321000	67055000	53406000	52794000	50151000	62247000	48063000	61595000	22523000	98582000	11445000
sp|P78371|TCPB_HUMAN	6391500	12425000	8983500	23514000	27172000	24178000	50425000	34826000	31737000	14640000	19716000	34970000	17248000	26713000	44169000	7619900	68443000	25298000	12685000	8384200	18459000	17653000	7961300	20003000	34571000	56096000	12406000
sp|Q01518|CAP1_HUMAN	43887000	52645000	28469000	111470000	53389000	27542000	103350000	53981000	51438000	52361000	36872000	66899000	52033000	45746000	112140000	65158000	26570000	43222000	38974000	24948000	29286000	35158000	35550000	39630000	106450000	73536000	44413000
sp|Q8WUM4|PDC6I_HUMAN	50738000	33679000	31690000	218620000	79478000	96251000	107880000	119360000	116970000	78192000	60900000	69301000	58249000	56710000	61718000	98101000	41727000	64145000	40767000	62611000	56690000	54542000	50431000	28573000	41148000	104730000	62005000
sp|Q96QV6|H2A1A_HUMAN;sp|P16104|H2AX_HUMAN;sp|Q8IUE6|H2A2B_HUMAN	19987000	31953000	20297000	180020000	224400000	245130000	511240000	447660000	162140000	231060000	137060000	341420000	21681000	259840000	25841000	88243000	136520000	29111000	14958000	42761000	61644000	31595000	12073000	107020000	113600000	417960000	8441900
sp|Q9Y646|CBPQ_HUMAN	14126000	25395000	20137000	79493000	157040000	64697000	34060000	45990000	19472000	44257000	26485000	29180000	13961000	25441000	8482600	16963000	6653400	23122000	19713000	44882000	37220000	18341000	20480000	35518000	21639000	51651000	41181000
sp|P17900|SAP3_HUMAN	30650000	23004000	17101000	50823000	71090000	18660000	21974000	39939000	72587000	58503000	18601000	42713000	42960000	20306000	5094700	19067000	32180000	16465000	12408000	9486800	12436000	11754000	7965900	28332000	39539000	46604000	27517000
sp|P60660|MYL6_HUMAN;sp|P14649|MYL6B_HUMAN	23106000	16755000	20546000	42934000	27241000	32859000	40482000	18768000	29967000	21243000	18481000	22117000	54941000	60654000	15363000	22984000	13341000	19461000	13156000	15073000	16513000	18708000	11253000	8747600	34157000	41922000	18537000
sp|P51159|RB27A_HUMAN	24370000	5121400	19023000	85214000	35127000	65560000	42347000	71009000	66128000	22313000	24620000	47976000	46504000	45121000	21885000	30004000	28070000	42417000	22488000	59643000	48443000	20385000	37894000	46963000	20728000	61376000	32318000
sp|P17050|NAGAB_HUMAN	11125000	3453700	11117000	27543000	16346000	16165000	33777000	15872000	18044000	16362000	15035000	17529000	11794000	10978000	18056000	7486900	8791800	8000000	9342000	8197100	9536600	3691900	4302100	9055400	6699400	20168000	8248400
sp|P49189|AL9A1_HUMAN	36281000	27514000	10965000	100110000	71324000	26944000	19863000	37987000	34813000	53475000	44543000	34713000	28505000	25471000	13916000	8086400	9020500	21261000	24462000	27787000	47525000	34067000	41133000	6484500	15592000	37551000	17922000
sp|O43278|SPIT1_HUMAN	26597000	18142000	31038000	52027000	19799000	37597000	49659000	55728000	43119000	29415000	50303000	36318000	34620000	22268000	27483000	12690000	34755000	12092000	13747000	29250000	21540000	18637000	16845000	17403000	12328000	69022000	19914000
sp|P13861|KAP2_HUMAN;sp|P31323|KAP3_HUMAN	29938000	39994000	20500000	195920000	62462000	34726000	71955000	120660000	49547000	32820000	22019000	37855000	22409000	9721800	18328000	7275200	27960000	21183000	15798000	29021000	27996000	39650000	36736000	51886000	35024000	61038000	25026000
sp|P22748|CAH4_HUMAN	11799000	6999300	14056000	72331000	5420400	48965000	87452000	38982000	7874000	5232900	24830000	8284200	7305700	7150500	6330800	16065000	18798000	5688000	14285000	7328200	16765000	10329000	4420400	34130000	8784800	89153000	9256000
sp|P23526|SAHH_HUMAN	14481000	17416000	9397100	54816000	32390000	18485000	32716000	11967000	24975000	13746000	21785000	38025000	18860000	9987300	8527100	9613800	13959000	19127000	14912000	22638000	17250000	21116000	23905000	5967600	13290000	33991000	11003000
sp|P07737|PROF1_HUMAN;CON__P02584	74500000	42774000	82764000	102890000	85878000	91343000	100300000	87938000	54187000	23492000	49147000	69167000	58169000	70682000	71547000	70497000	119690000	54294000	72884000	63788000	28147000	74284000	74035000	38855000	176990000	51073000	48854000
sp|O95716|RAB3D_HUMAN;sp|Q96E17|RAB3C_HUMAN	45393000	30815000	60118000	150900000	53346000	66332000	52558000	80579000	88954000	50394000	84865000	82522000	90575000	67639000	60468000	57714000	44071000	60615000	59306000	84549000	91221000	63184000	88885000	32366000	41210000	91215000	53029000
sp|O14818|PSA7_HUMAN	17278000	10649000	18779000	56551000	35790000	36545000	47122000	35404000	15852000	13554000	15163000	38874000	12266000	11925000	7529800	4047400	10207000	13452000	14850000	12025000	12327000	12159000	12240000	19203000	12677000	36806000	13306000
sp|P23528|COF1_HUMAN;sp|Q9Y281|COF2_HUMAN	218560000	225090000	350260000	711800000	460070000	499200000	459960000	578200000	455650000	230560000	294260000	418580000	438610000	193320000	109670000	59623000	210870000	301210000	293740000	431770000	408980000	353700000	435520000	536860000	831400000	426120000	269400000
sp|P14174|MIF_HUMAN	100220000	181600000	78815000	853860000	899840000	641880000	602080000	898900000	347080000	755450000	205920000	260740000	298400000	875410000	242360000	347430000	784550000	55185000	82911000	104060000	247450000	160890000	92672000	1069400000	228120000	759840000	352230000
sp|O00462|MANBA_HUMAN	16471000	8811000	17475000	31189000	20262000	11025000	20848000	30608000	12424000	18281000	17106000	12546000	24452000	31082000	9746500	12116000	7722600	14427000	14120000	16353000	32127000	10715000	21389000	31312000	9357800	34172000	19946000
sp|P49773|HINT1_HUMAN	25413000	20594000	25042000	72567000	32166000	33865000	60849000	55308000	40373000	16523000	20030000	32738000	31252000	28148000	10108000	50041000	60126000	24907000	22489000	30836000	25741000	25746000	29673000	9113300	30228000	42488000	5031200
sp|Q14118|DAG1_HUMAN	34535000	66718000	38165000	171150000	66350000	60421000	59927000	83342000	38239000	43390000	17729000	30689000	31649000	32254000	36418000	10146000	21657000	23354000	47882000	30967000	23796000	16493000	7537100	33966000	20330000	38654000	34734000
sp|Q8NBJ4|GOLM1_HUMAN	170970000	32532000	51709000	122500000	20321000	162190000	94287000	114530000	80976000	53043000	29441000	78589000	80364000	124190000	12966000	68343000	69631000	53954000	2771400	6894800	53492000	34205000	34591000	62985000	18671000	48849000	27194000
sp|P21266|GSTM3_HUMAN	29799000	46002000	19154000	60666000	60521000	40358000	152190000	126960000	40536000	36473000	16979000	60656000	36659000	44079000	23184000	21101000	118650000	60267000	14443000	16698000	64127000	36169000	50636000	71869000	71308000	84313000	38914000
sp|Q01459|DIAC_HUMAN	21968000	29877000	16814000	44629000	23111000	25262000	38536000	26133000	34618000	25535000	25128000	23049000	8925900	26732000	8574400	14805000	11574000	21833000	16384000	41695000	35643000	17712000	26055000	23099000	7869000	33404000	22291000
sp|Q9BUN1|MENT_HUMAN	10338000	1537800	34140000	159420000	56437000	21956000	200950000	183990000	17692000	12337000	27133000	23901000	2779900	9103100	428310	6957700	10704000	6988100	4668500	4088600	6034800	934180	454470	9737700	3303800	96718000	5222800
sp|P08134|RHOC_HUMAN;sp|P62745|RHOB_HUMAN	2612500	10439000	16633000	32474000	10863000	27662000	24069000	18874000	17677000	12291000	17089000	22159000	25935000	28539000	19640000	1607900	13965000	21232000	13246000	53649000	55967000	12648000	28472000	5085900	18480000	36112000	19507000
sp|O60888|CUTA_HUMAN	60901000	63455000	82649000	221940000	193210000	201990000	205110000	172460000	112500000	169490000	40294000	130750000	77201000	135590000	153920000	84763000	88984000	38942000	34120000	43027000	56024000	35011000	18042000	145070000	117650000	99786000	84109000
sp|Q9Y3R5|DOP2_HUMAN	14414000	6762600	11836000	32656000	3897800	15436000	6561200	25931000	43591000	20757000	7278400	15845000	21072000	26644000	15018000	13599000	4126100	8711300	10105000	9431900	16142000	9133200	12313000	13823000	9292300	24005000	24196000
sp|P03950|ANGI_HUMAN	25075000	27985000	15892000	160180000	20285000	144870000	33834000	121560000	39357000	174180000	35487000	66881000	20376000	30061000	22615000	26001000	32094000	23645000	20493000	28542000	26133000	8615300	7043500	28074000	15743000	44429000	29131000
sp|P04066|FUCO_HUMAN	100470000	119190000	44995000	193810000	105320000	193890000	210020000	159240000	128440000	161420000	60173000	128630000	52359000	125440000	96659000	77360000	96384000	59011000	57667000	59052000	85422000	40132000	59040000	198540000	83460000	108130000	122430000
sp|P17405|ASM_HUMAN	70244000	44059000	64052000	94378000	146010000	96304000	192970000	163170000	42768000	105290000	42480000	107610000	61522000	61650000	69663000	23475000	66793000	35492000	57382000	38211000	71122000	18686000	21103000	46658000	51506000	50454000	61720000
sp|O00194|RB27B_HUMAN	31949000	12769000	30193000	52928000	16754000	59886000	28424000	62548000	61591000	27097000	23529000	32521000	35710000	55669000	23486000	22467000	13474000	38228000	36323000	44463000	62366000	39892000	52395000	32051000	18975000	44271000	30984000
sp|P34096|RNAS4_HUMAN	62497000	58689000	45290000	160240000	103910000	172330000	116000000	109300000	90711000	69860000	93951000	129820000	81125000	121310000	70795000	80891000	69959000	58403000	47192000	62148000	96766000	52903000	58495000	70821000	41097000	86744000	50196000
sp|Q13510|ASAH1_HUMAN	106690000	124640000	62147000	131450000	213910000	77476000	115610000	66209000	133390000	251350000	84779000	240240000	31151000	115030000	113370000	135710000	81514000	110160000	85036000	106940000	89634000	69431000	87315000	178480000	73863000	148760000	89345000
sp|P13987|CD59_HUMAN	102080000	104960000	142870000	469220000	285600000	176700000	425130000	180370000	90249000	227460000	73891000	147170000	107620000	62062000	61464000	53454000	93376000	38464000	31830000	28626000	34626000	20536000	4671400	104220000	99019000	195620000	81981000
sp|P07195|LDHB_HUMAN	39822000	44381000	26984000	65117000	35190000	39356000	68234000	63500000	50855000	62498000	55220000	73884000	66490000	82050000	38032000	67906000	69331000	50483000	45064000	54126000	60366000	63374000	55767000	9516500	33301000	66717000	36054000
sp|Q9NS15|LTBP3_HUMAN	15823000	13558000	13724000	33337000	20271000	18909000	17838000	12270000	10410000	21760000	12357000	32393000	19234000	3262000	5428100	10554000	12947000	6336500	7335100	9417300	7945700	2490300	1456000	11218000	14963000	22237000	18033000
sp|O60568|PLOD3_HUMAN	10722000	12791000	11519000	47615000	37993000	32331000	38689000	38296000	20862000	74510000	11552000	29527000	28294000	11908000	7479700	5034100	5944600	9440400	10703000	11232000	6860300	5883200	7500300	17247000	7102300	14137000	17762000
sp|P28907|CD38_HUMAN	73956000	51130000	78783000	251920000	101110000	167320000	65481000	179970000	71939000	100320000	91886000	177690000	79230000	111500000	51128000	119790000	54462000	69887000	47116000	87093000	59306000	106540000	41625000	12737000	70388000	72655000	53144000
sp|P04004|VTNC_HUMAN;CON__Q3ZBS7	76618000	33857000	203380000	53503000	110690000	37816000	72855000	60452000	42278000	131760000	54415000	83220000	48766000	119190000	66926000	75677000	44029000	36155000	69322000	29428000	63338000	24420000	5745500	202940000	12581000	73921000	38225000
sp|P20155|ISK2_HUMAN	194100000	281610000	43433000	343380000	102080000	138100000	174390000	37929000	84985000	64812000	75952000	103210000	37669000	9674200	27885000	11582000	184630000	159880000	154450000	277720000	121730000	144720000	143360000	151960000	101680000	276970000	81117000
sp|O43175|SERA_HUMAN	18139000	16309000	19493000	38643000	49085000	33530000	22437000	46552000	56145000	26951000	33857000	42392000	46414000	60902000	25936000	58291000	29189000	38399000	31708000	38267000	38535000	27626000	16407000	17750000	19936000	31631000	22974000
sp|P15259|PGAM2_HUMAN	27368000	28826000	62310000	383680000	176960000	84758000	357510000	250970000	51115000	9296000	64908000	166070000	90117000	108640000	16505000	74418000	54862000	41862000	27640000	20137000	40742000	29850000	32233000	20756000	30609000	206610000	15155000
sp|P60953|CDC42_HUMAN;sp|P84095|RHOG_HUMAN;sp|Q9H4E5|RHOJ_HUMAN	20005000	17044000	19104000	48294000	26624000	30615000	22945000	32451000	42123000	27934000	26478000	31870000	30597000	30044000	25030000	24864000	42048000	4876800	24471000	30095000	30233000	18174000	25470000	38662000	33497000	49102000	20491000
sp|Q9UHL4|DPP2_HUMAN	35503000	17357000	42427000	157900000	50798000	94213000	82012000	61766000	53836000	33802000	46725000	59502000	32012000	35758000	19215000	46278000	20080000	46978000	40016000	8060100	18314000	15771000	25583000	43733000	35438000	31218000	44013000
sp|P08118|MSMB_HUMAN	2781400000	243220000	5229100000	2209100000	3715200000	4203900000	432620000	2554400000	3872600000	3835900000	661830000	4972900000	3306300000	1561500000	3193600000	4712100000	1286700000	6237300000	3560300000	9951700000	7819100000	3467700000	1391500000	66312000	424710000	979060000	987170000
sp|Q14697|GANAB_HUMAN	61963000	30365000	29261000	110100000	68458000	80033000	127560000	107070000	40908000	80000000	21325000	69500000	30462000	30945000	26697000	49986000	49210000	21916000	37320000	22886000	25667000	18164000	13044000	66189000	29649000	72807000	35661000
sp|Q99519|NEUR1_HUMAN	29365000	31975000	36490000	69723000	99504000	52172000	54440000	46721000	28465000	68417000	25284000	65426000	39369000	21590000	27414000	37743000	34814000	29454000	33728000	23242000	24310000	13306000	12171000	38919000	24864000	48393000	25889000
sp|P30044|PRDX5_HUMAN	20563000	27998000	12482000	76963000	85582000	30490000	71224000	61361000	55921000	13146000	21547000	42333000	44031000	38053000	40235000	54059000	35656000	25418000	16022000	22036000	21958000	16526000	16570000	28429000	36251000	59863000	23494000
sp|P11279|LAMP1_HUMAN	19401000	36352000	37697000	157230000	90982000	36556000	39260000	50743000	75129000	47626000	35568000	60754000	71401000	98762000	50370000	51665000	98593000	18620000	22325000	40569000	22630000	27087000	24631000	79976000	52697000	35222000	43923000
sp|P54802|ANAG_HUMAN	35106000	47672000	19411000	100470000	84632000	43993000	46196000	25163000	58342000	62315000	22102000	35968000	24875000	62990000	22745000	20584000	24890000	19263000	15874000	17248000	15590000	2179500	827570	20868000	36495000	65758000	41543000
sp|P11717|MPRI_HUMAN	38592000	17561000	31693000	97729000	9036200	51439000	47767000	102670000	59101000	32755000	64891000	27002000	17749000	66906000	18922000	30832000	40388000	22275000	14203000	43990000	43214000	8229100	13198000	11693000	10875000	68706000	20391000
sp|P54727|RD23B_HUMAN	8531800	9113800	26966000	43752000	17622000	26585000	57975000	18526000	27782000	29362000	13474000	21304000	20976000	37682000	9609900	23728000	7991500	7438300	6988700	6427500	7090200	15083000	12218000	10707000	14005000	50585000	9668400
sp|P14550|AK1A1_HUMAN	18665000	36125000	9531400	63076000	29295000	46979000	21298000	42333000	24987000	23759000	22807000	37052000	20992000	11984000	10181000	8063700	12083000	21165000	22500000	24835000	40301000	23970000	35656000	12229000	24433000	37759000	21686000
sp|P10253|LYAG_HUMAN	61677000	77363000	70495000	162100000	119230000	178720000	206190000	115930000	114040000	50578000	72798000	107230000	42826000	98878000	33636000	81542000	127080000	84561000	94125000	76431000	83497000	48695000	63464000	116210000	45871000	217320000	72010000
sp|P48723|HSP13_HUMAN	51293000	55130000	59792000	146760000	126910000	116430000	72168000	80775000	63255000	176140000	40661000	76966000	59687000	30066000	111700000	102470000	32325000	60884000	59501000	50633000	48465000	16443000	8908600	155890000	45721000	64174000	44731000
sp|P15289|ARSA_HUMAN	26672000	55420000	32102000	71279000	53873000	25933000	90308000	43797000	46408000	38217000	37281000	20760000	16820000	40636000	48565000	24854000	19936000	28647000	30862000	14603000	27022000	12372000	9192000	55050000	20582000	63350000	14632000
sp|P00450|CERU_HUMAN;CON__ENSEMBL:ENSBTAP00000031900	28429000	20995000	218660000	39215000	28809000	18488000	84195000	32158000	6888400	38278000	15893000	43032000	27201000	66903000	36396000	132320000	38771000	85328000	24631000	14594000	21747000	16139000	29837000	122410000	62469000	113140000	39078000
sp|Q66K79|CBPZ_HUMAN	134240000	69153000	64878000	236240000	142240000	185760000	210800000	57864000	55451000	249200000	71784000	92907000	123310000	59254000	96962000	147550000	50742000	61720000	42487000	44632000	68015000	30232000	33548000	273100000	79662000	165920000	116600000
sp|A6NGU5|GGT3_HUMAN;sp|Q14390|GGTL2_HUMAN	61635000	21772000	77630000	413150000	78123000	239600000	164330000	260730000	124210000	87517000	124390000	104240000	57462000	209040000	63515000	118650000	218890000	44510000	62315000	71885000	94331000	49425000	62378000	253730000	54040000	266420000	95157000
sp|O00339|MATN2_HUMAN	29331000	58059000	60027000	163820000	96979000	89575000	86993000	103650000	19202000	120130000	39569000	84220000	72544000	25721000	45995000	42553000	3510700	15387000	35756000	43327000	51849000	10304000	4381700	93113000	31906000	87773000	102260000
sp|O00391|QSOX1_HUMAN	747070000	1148400000	997480000	2888500000	1539400000	1288500000	1367600000	1269400000	597300000	1274600000	620680000	1386500000	902080000	583340000	534470000	687580000	1210200000	519250000	702930000	647940000	831780000	419010000	439350000	1667400000	730150000	974520000	926060000
sp|O00468|AGRIN_HUMAN	35081000	23275000	28153000	69221000	25099000	56533000	69656000	80301000	28861000	32322000	32074000	37854000	55971000	15511000	25119000	28179000	32916000	29994000	23484000	43379000	56498000	20496000	37897000	36364000	22625000	59125000	41289000
sp|O00560|SDCB1_HUMAN	72030000	64793000	38760000	176430000	44754000	108190000	81738000	134230000	129440000	80797000	90504000	101740000	95041000	155750000	94099000	111090000	75663000	78270000	70197000	114810000	87889000	56780000	68093000	77578000	34781000	103180000	78661000
sp|O00584|RNT2_HUMAN	470370000	591080000	404380000	1690600000	644870000	612190000	1093400000	864590000	359020000	667710000	252470000	301420000	404920000	526890000	196920000	369200000	510830000	175650000	174440000	154460000	234280000	156880000	95118000	517530000	263290000	626360000	249740000
sp|O14773|TPP1_HUMAN	111900000	155840000	117260000	348670000	273120000	304110000	216800000	159320000	145240000	311880000	67210000	213740000	128020000	234160000	174550000	111970000	144540000	95205000	105170000	87891000	118120000	78612000	49362000	195900000	100790000	203860000	120150000
sp|O15230|LAMA5_HUMAN;sp|Q16787|LAMA3_HUMAN	351180000	50453000	410210000	981180000	549330000	282820000	455870000	576150000	414740000	759930000	274820000	349850000	358930000	267950000	243840000	284090000	217740000	232550000	215860000	412720000	406730000	158160000	209380000	335270000	224470000	731970000	338650000
sp|O15393|TMPS2_HUMAN	134650000	48143000	96686000	179940000	87032000	211610000	225230000	147740000	142750000	101230000	139310000	196900000	139790000	255230000	150270000	75123000	156080000	108570000	92665000	213130000	110630000	69695000	112260000	78597000	52774000	227960000	91103000
sp|O43451|MGA_HUMAN;sp|Q2M2H8|MGAL_HUMAN	44382000	45382000	54151000	133970000	53176000	65802000	233210000	149700000	30873000	53832000	77714000	66164000	15473000	69440000	65766000	61726000	141280000	39098000	27286000	29299000	72330000	58938000	23773000	68798000	51410000	154760000	25811000
sp|O43707|ACTN4_HUMAN;sp|P35609|ACTN2_HUMAN;sp|Q08043|ACTN3_HUMAN;sp|Q9H254|SPTN4_HUMAN	29985000	29613000	22153000	47367000	41173000	33490000	57201000	22466000	39215000	11400000	25578000	45676000	44685000	63892000	91694000	40357000	57418000	31807000	21429000	23767000	34487000	37111000	28086000	48974000	36755000	29247000	29059000
sp|O75874|IDHC_HUMAN;sp|P48735|IDHP_HUMAN	150010000	176280000	146000000	326580000	134220000	219850000	165060000	171230000	197270000	114310000	211360000	218680000	268560000	158600000	131110000	162470000	134730000	195420000	169040000	192370000	201810000	156800000	272320000	134060000	102500000	166980000	108660000
sp|O75882|ATRN_HUMAN	28820000	22245000	29434000	128160000	40073000	82157000	97952000	70925000	38322000	47663000	29114000	51580000	15078000	25094000	8406800	27831000	41829000	25730000	22094000	33371000	27038000	24209000	27493000	31066000	20011000	68689000	26226000
sp|P00338|LDHA_HUMAN	29053000	58267000	43230000	118430000	75581000	64805000	78652000	67984000	66407000	38620000	46013000	50160000	71975000	43723000	22086000	33858000	60600000	44430000	48336000	44880000	68645000	55038000	40912000	9941700	52700000	86380000	38954000
sp|P00558|PGK1_HUMAN	105760000	111540000	89674000	281010000	342720000	216940000	153540000	133740000	155860000	116860000	75291000	169310000	171280000	339210000	132600000	201010000	195760000	141040000	102900000	121150000	141870000	133760000	79793000	196070000	150190000	98771000	86590000
sp|P00751|CFAB_HUMAN	36932000	36125000	127680000	33801000	143630000	26088000	259000000	60335000	14550000	25148000	25317000	72356000	48416000	24468000	16313000	23426000	25933000	30972000	49932000	21875000	30080000	20412000	31246000	65512000	196870000	261830000	41067000
sp|P01009|A1AT_HUMAN	472390000	1641800000	1805900000	1709100000	1379400000	1791200000	1631700000	1345800000	515780000	1116800000	772670000	1285900000	1133600000	779300000	863830000	804120000	396650000	723600000	703350000	468880000	603890000	138090000	176520000	1051300000	980750000	1436900000	907590000
sp|P01011|AACT_HUMAN	44455000	171360000	35336000	121250000	181390000	78068000	290080000	47665000	33443000	62660000	23558000	94329000	97602000	65138000	35016000	147450000	70753000	165480000	149140000	45129000	88138000	52546000	76583000	424000000	198120000	211670000	91936000
sp|P01019|ANGT_HUMAN	37658000	143820000	57702000	127940000	21853000	174730000	47629000	42547000	27306000	5385900	23542000	18380000	26542000	68340000	24669000	33461000	9384200	31698000	40357000	17700000	36705000	76142000	25238000	1105800	19625000	60734000	112850000
sp|P01024|CO3_HUMAN;sp|O95568|MET18_HUMAN	62143000	64958000	506150000	142280000	68457000	50881000	381080000	52165000	14974000	70534000	36643000	64624000	60099000	49782000	25111000	49664000	70625000	100840000	85831000	43062000	72849000	29921000	68433000	177630000	122590000	342620000	106550000
sp|P01033|TIMP1_HUMAN	878910000	812520000	1255900000	2423700000	1242100000	778900000	1115500000	2348700000	1434600000	1686200000	1294500000	1503700000	902680000	2173300000	967860000	1662800000	1437400000	776900000	713490000	1178900000	962900000	730790000	677860000	2224400000	721940000	1400000000	1110400000
sp|P01034|CYTC_HUMAN	370590000	345880000	544700000	1213200000	1292300000	897210000	851800000	963510000	433600000	673030000	514500000	548280000	378180000	363000000	316050000	662060000	484640000	186220000	187760000	253540000	214730000	74155000	130970000	587210000	213770000	522390000	467940000
sp|P01036|CYTS_HUMAN;sp|P09228|CYTT_HUMAN	64756000	50622000	147800000	100190000	1717000000	408340000	99109000	44130000	223760000	4308100	33612000	16265000	456680000	118410000	928300000	352640000	421540000	66504000	156680000	1074300000	12820000	15210000	2917400	85572000	410620000	35659000	232800000
sp|P01833|PIGR_HUMAN	115090000	283150000	172290000	41187000	187840000	35253000	870290000	143510000	44171000	28753000	27817000	470300000	105580000	304670000	38170000	231100000	80805000	114460000	128150000	199270000	27361000	33228000	93050000	347100000	265990000	284400000	76203000
sp|P01834|IGKC_HUMAN	452490000	397060000	2573400000	1013000000	1068200000	592360000	1930800000	490790000	211550000	399770000	496690000	662180000	852750000	889240000	264080000	323530000	482510000	371120000	524000000	393660000	440820000	295370000	602030000	715160000	933200000	2291400000	1104100000
sp|P01857|IGHG1_HUMAN	348500000	393210000	3154500000	2481000000	1633200000	644450000	2049900000	696570000	210810000	471610000	203880000	453910000	714970000	705680000	520620000	582030000	731590000	365120000	600660000	377030000	363300000	271620000	659480000	1265900000	528390000	1864000000	753810000
sp|P01859|IGHG2_HUMAN	319370000	124070000	1346400000	741930000	364120000	518580000	922740000	571960000	155120000	243060000	99077000	150750000	274790000	795890000	138990000	458190000	238960000	249810000	205540000	137420000	232850000	178690000	306250000	1029900000	417750000	815660000	281620000
sp|P01876|IGHA1_HUMAN	211440000	126790000	637230000	145990000	253500000	126340000	998690000	92985000	35194000	61378000	107930000	148610000	214960000	619910000	66009000	108370000	223630000	71802000	206470000	240070000	65886000	78411000	140280000	887490000	560020000	610410000	123200000
sp|P02749|APOH_HUMAN	49094000	55498000	229040000	73782000	43118000	53373000	102850000	45178000	51515000	53933000	44017000	76428000	72267000	81041000	32889000	61139000	60843000	63167000	40529000	52957000	62894000	36902000	49543000	186710000	74768000	101070000	74056000
sp|P02750|A2GL_HUMAN	94270000	119770000	97676000	276660000	265690000	120680000	175730000	188450000	71058000	160080000	76934000	116830000	95564000	62387000	103300000	133010000	130350000	57420000	64833000	59273000	75723000	57023000	24169000	103590000	70283000	134680000	138130000
sp|P02751|FINC_HUMAN	1795900000	1799000000	1113500000	1908300000	2713600000	4606200000	1782000000	5276000000	823870000	3924500000	689350000	1477800000	1238900000	1802600000	1237000000	1728100000	412810000	1152900000	1096100000	639740000	1659600000	1301000000	407910000	1754000000	633340000	3267400000	2539100000
sp|P02763|A1AG1_HUMAN	93556000	87455000	522620000	610080000	376750000	404150000	643740000	369420000	73255000	196730000	45798000	213050000	139970000	248010000	132790000	375890000	236080000	324030000	403440000	76996000	88504000	23523000	454350000	290950000	241630000	678410000	163830000
sp|P02766|TTHY_HUMAN	40975000	31936000	224950000	86081000	80656000	56182000	74196000	28760000	31418000	45954000	7056400	76179000	41328000	8725800	21549000	66381000	29122000	49969000	49782000	60705000	58859000	37577000	75888000	106200000	59050000	62727000	32705000
sp|P02768|ALBU_HUMAN;CON__P02768-1	4597300000	4233900000	18494000000	11291000000	7365500000	5049100000	11893000000	5203300000	3139100000	4780400000	2456000000	6059600000	4356600000	7296400000	3401400000	6055800000	3714900000	9865800000	8361900000	19017000000	15621000000	12240000000	14470000000	9283300000	5013800000	9161300000	5413500000
sp|P02774|VTDB_HUMAN;CON__Q3MHN5;CON__ENSEMBL:ENSBTAP00000018229	62630000	40729000	120400000	81943000	66601000	40374000	91623000	54605000	36510000	44872000	18464000	42837000	38257000	35641000	32009000	101260000	38444000	48932000	16683000	10718000	16953000	4975700	12347000	97849000	58124000	83053000	41797000
sp|P02787|TRFE_HUMAN;CON__Q2HJF0	322810000	213290000	1581700000	1022300000	373450000	419760000	1125400000	527900000	192180000	372390000	207330000	432070000	230800000	476520000	225920000	584720000	181270000	504890000	179430000	143860000	244640000	126800000	229840000	647980000	581480000	1326000000	417320000
sp|P02788|TRFL_HUMAN	9589800000	8491900000	3167400000	12134000000	18722000000	3364600000	11926000000	14176000000	4847000000	3274700000	3725100000	11235000000	6352800000	6103700000	6940500000	4132800000	8063000000	2173600000	4667600000	6393600000	3768900000	4042900000	1772200000	10334000000	4805700000	11720000000	10736000000
sp|P02790|HEMO_HUMAN	255130000	220920000	643470000	301390000	181060000	244230000	412480000	248170000	129570000	198170000	148010000	241290000	214330000	550820000	125980000	380550000	263630000	449530000	446790000	330710000	395960000	175140000	449060000	473640000	180400000	382200000	164970000
sp|P03973|SLPI_HUMAN	639570000	173690000	458330000	1247000000	548280000	313640000	804190000	451440000	113580000	219630000	596660000	1025100000	171070000	148900000	148250000	44712000	189240000	74545000	196020000	262250000	231090000	67723000	59608000	336240000	560970000	994280000	504690000
sp|P04075|ALDOA_HUMAN;sp|P05062|ALDOB_HUMAN	115480000	114120000	101870000	318010000	291520000	194610000	266250000	216070000	181830000	103980000	157930000	160630000	209700000	218440000	145930000	207180000	231110000	136130000	99212000	103930000	160550000	120860000	164480000	182990000	123010000	203650000	92058000
sp|P04083|ANXA1_HUMAN	98301000	69690000	78952000	264960000	98660000	147760000	211420000	124640000	120740000	97726000	72316000	146740000	193950000	115920000	77952000	70149000	54281000	77046000	77074000	100400000	99466000	107370000	95983000	50029000	176000000	135500000	54898000
sp|P04264|K2C1_HUMAN;CON__P04264;CON__Q922U2;CON__Q5XQN5;CON__Q6IFZ6;CON__H-INV:HIT000016045;CON__Q8BGZ7;CON__P50446	92499000	75486000	53887000	244660000	68236000	25143000	28031000	22952000	23712000	69156000	139620000	140950000	169500000	29461000	111820000	47610000	146330000	48475000	67344000	89132000	49031000	57262000	101540000	45304000	38759000	52447000	23508000
sp|P04279|SEMG1_HUMAN	18136000000	46622000000	49598000000	62832000000	114130000000	55960000000	59969000000	44115000000	26558000000	104580000000	18879000000	97577000000	60629000000	35019000000	12949000000	29503000000	11453000000	13718000000	15758000000	15282000000	9405800000	9979300000	2941600000	31621000000	33377000000	39100000000	35870000000
sp|P04406|G3P_HUMAN	211590000	282880000	233870000	658100000	599550000	326660000	433620000	402960000	257330000	221670000	240100000	505090000	449890000	516690000	206760000	255660000	338250000	240130000	241740000	250000000	268210000	241060000	295050000	258720000	449130000	521530000	130920000
sp|P04792|HSPB1_HUMAN	95100000	142610000	81759000	312540000	205900000	121720000	76491000	130950000	150740000	155300000	132230000	247350000	139050000	200280000	112120000	156450000	130550000	87863000	76343000	139320000	128900000	122370000	152560000	92226000	131850000	137310000	72276000
sp|P05067|A4_HUMAN	60072000	35111000	57058000	155060000	82272000	97370000	58100000	82681000	118260000	139790000	59512000	80695000	105660000	61241000	54181000	105290000	40814000	22827000	11526000	48758000	26383000	26383000	2920700	53923000	13647000	80108000	55392000
sp|P05154|IPSP_HUMAN	842240000	1717900000	348110000	1381800000	908550000	1160700000	1053900000	1139600000	487380000	883840000	752430000	1006600000	999910000	602480000	754830000	728720000	831280000	586090000	757430000	972350000	1117300000	380020000	418000000	827200000	622320000	676760000	859490000
sp|P05155|IC1_HUMAN	60302000	141990000	118570000	98843000	202700000	109320000	138410000	344310000	27154000	94068000	76195000	75524000	52273000	72616000	80569000	44881000	72374000	87799000	184610000	265930000	247960000	115830000	263150000	89330000	57421000	146430000	105460000
sp|P06280|AGAL_HUMAN	48039000	24291000	14835000	91174000	160370000	62686000	128840000	81892000	53556000	50855000	44371000	93263000	52681000	76011000	83705000	82901000	61149000	31260000	21168000	33062000	22193000	17149000	11667000	78246000	19845000	42574000	29534000
sp|P06733|ENOA_HUMAN;sp|P13929|ENOB_HUMAN;sp|P09104|ENOG_HUMAN	101040000	99383000	97825000	320150000	197820000	154770000	306020000	225330000	136670000	129490000	102310000	175040000	172310000	232840000	99848000	137160000	135700000	108150000	73499000	123940000	143010000	113940000	117320000	166930000	169810000	212360000	95851000
sp|P06858|LIPL_HUMAN	434850000	445620000	244910000	738530000	675310000	428360000	321920000	323480000	417570000	1251200000	247350000	746620000	326330000	559730000	325490000	403990000	451330000	345260000	409770000	214420000	311860000	158440000	66036000	732820000	316880000	443570000	234870000
sp|P06865|HEXA_HUMAN	50873000	56089000	71755000	133440000	76034000	88522000	141140000	77559000	64690000	66304000	35243000	86134000	38880000	78276000	34529000	31211000	64593000	38654000	38626000	47426000	42490000	45775000	36347000	119030000	34105000	90322000	51710000
sp|P07288|KLK3_HUMAN	9618300000	6244100000	6649100000	41306000000	11822000000	23066000000	17266000000	27307000000	27727000000	29366000000	13470000000	15559000000	16697000000	19448000000	10204000000	15829000000	9711000000	6422300000	5005200000	16002000000	7346400000	4558700000	5019800000	11304000000	11197000000	24830000000	17840000000
sp|P07339|CATD_HUMAN	178930000	166800000	159830000	539400000	600680000	332790000	353320000	298120000	235550000	348370000	169140000	449630000	201440000	282920000	290270000	453820000	343230000	154350000	197970000	129860000	155270000	142330000	106170000	784000000	244640000	272780000	217840000
sp|P07355|ANXA2_HUMAN;sp|A6NMY6|AXA2L_HUMAN	37978000	62680000	90087000	116010000	107980000	50563000	69765000	50223000	104730000	57040000	72257000	102450000	134950000	125750000	84582000	45447000	70229000	49289000	32646000	73472000	55823000	72041000	72257000	71037000	70405000	68146000	61274000
sp|P07602|SAP_HUMAN	1036800000	800610000	647450000	2716900000	2223300000	828230000	1059400000	934530000	836870000	1231200000	262220000	1402400000	1073600000	656910000	657510000	539910000	530980000	247150000	245920000	289810000	259080000	175680000	146290000	777220000	680440000	734920000	760340000
sp|P07686|HEXB_HUMAN	99909000	110530000	139460000	355450000	227520000	269330000	403540000	222050000	156490000	181280000	137110000	195890000	79782000	173490000	122060000	132060000	226810000	108190000	128400000	107580000	104810000	113980000	125780000	343470000	93412000	354180000	82353000
sp|P07858|CATB_HUMAN	99968000	115760000	105960000	178410000	178300000	99559000	134200000	190540000	70188000	189640000	105980000	194770000	124470000	96276000	140200000	146020000	106660000	72671000	66309000	81644000	76256000	47583000	33984000	172030000	57321000	86539000	106390000
sp|P07864|LDHC_HUMAN;sp|Q6ZMR3|LDH6A_HUMAN	88234000	90642000	183870000	715480000	426980000	243930000	1114500000	828790000	148070000	216000000	136120000	253680000	50560000	424670000	89857000	193760000	657610000	191940000	96729000	47610000	158040000	140020000	97926000	357240000	177970000	694890000	57856000
sp|P07900|HS90A_HUMAN;sp|Q58FG0|HS905_HUMAN;sp|Q14568|HS902_HUMAN;sp|Q58FG1|HS904_HUMAN	118310000	151730000	134410000	589460000	385620000	312170000	902430000	733140000	256570000	144780000	162010000	382940000	302970000	257270000	202720000	247430000	718260000	229750000	129180000	126830000	298250000	292560000	282550000	211390000	287480000	512020000	141290000
sp|P07998|RNAS1_HUMAN	182530000	1868800000	101500000	982130000	856610000	625410000	457440000	1659800000	204740000	141350000	238320000	1734400000	248370000	821140000	228480000	250800000	631260000	151260000	302050000	118300000	334230000	259300000	81419000	775320000	109210000	785190000	404580000
sp|P08238|HS90B_HUMAN;sp|Q58FF7|H90B3_HUMAN	11982000	42080000	29293000	89864000	68816000	54649000	75977000	101310000	50343000	18349000	44560000	54960000	74282000	54550000	64282000	52267000	85263000	47712000	37049000	33440000	32151000	62838000	64165000	46993000	30861000	60792000	30978000
sp|P08253|MMP2_HUMAN	314870000	262710000	149530000	247910000	693120000	519340000	269790000	99240000	88038000	432030000	116770000	789240000	300770000	249300000	386430000	330590000	283910000	241960000	143780000	227270000	318940000	21046000	170370000	346680000	197800000	465140000	401400000
sp|P08294|SODE_HUMAN	112310000	76930000	44450000	360690000	82239000	254870000	168460000	264850000	189390000	103210000	58438000	143370000	79429000	193240000	57033000	176230000	59463000	90991000	91209000	94492000	76568000	63309000	44360000	141470000	61586000	224800000	105650000
sp|P08473|NEP_HUMAN	251570000	117970000	155670000	499140000	81714000	402960000	195830000	568760000	342780000	333840000	221430000	210510000	89719000	360180000	235160000	303300000	333840000	137410000	210900000	227370000	136800000	147980000	184830000	200520000	126050000	750560000	174470000
sp|P08571|CD14_HUMAN	43940000	19492000	46019000	33947000	39943000	43301000	148820000	52207000	15352000	35216000	30873000	21792000	12181000	87154000	55077000	12720000	44704000	4664300	20590000	10042000	10331000	37042000	11749000	81408000	22414000	67354000	17202000
sp|P08697|A2AP_HUMAN;CON__P28800	30990000	212050000	29608000	146830000	502210000	186800000	346200000	228260000	54039000	428890000	58933000	232440000	92324000	59986000	170630000	226310000	70983000	114540000	104150000	105600000	35077000	24750000	38784000	243730000	119140000	381060000	110450000
sp|P08758|ANXA5_HUMAN	117080000	144590000	95619000	214680000	133600000	144640000	165570000	120500000	181580000	184960000	86939000	180060000	255310000	336620000	194200000	220590000	108790000	72817000	84663000	104220000	109110000	78954000	103180000	97885000	97984000	223610000	90914000
sp|P09466|PAEP_HUMAN	2412300000	785050000	474860000	2682900000	7146800000	1775900000	3330000000	4603900000	790670000	7904800000	51981000	2647000000	2053400000	882290000	2661800000	4600800000	403930000	1497300000	117810000	2994100000	1535200000	599060000	327710000	5212000000	254390000	2457100000	6290800000
sp|P09467|F16P1_HUMAN	32825000	65958000	15782000	99210000	63059000	41261000	36986000	21411000	42341000	50333000	41095000	41157000	73860000	82309000	45849000	75344000	19092000	35219000	45749000	41041000	33423000	26336000	71453000	64698000	47251000	87150000	51222000
sp|P0C0L4|CO4A_HUMAN;CON__P01030;CON__ENSEMBL:ENSBTAP00000007350	22428000	59578000	497610000	30550000	36284000	46884000	269460000	69331000	19699000	32570000	14320000	75690000	23112000	28902000	50756000	219650000	185270000	201220000	50339000	20026000	64723000	90160000	56444000	96274000	101970000	199120000	61211000
sp|P0DMV9|HS71B_HUMAN;sp|P0DMV8|HS71A_HUMAN	71013000	78070000	93925000	213690000	112710000	138790000	175180000	205620000	123730000	27728000	87395000	163820000	121770000	113370000	121240000	91023000	163730000	84299000	82826000	104220000	117450000	120790000	119840000	84178000	103960000	143860000	72140000
sp|P0DOY3|IGLC3_HUMAN;sp|P0DOY2|IGLC2_HUMAN	207560000	110820000	986020000	883950000	456000000	269090000	821640000	293480000	204450000	308750000	134150000	297090000	544670000	151820000	134510000	162420000	167940000	130920000	311230000	134570000	92645000	119290000	185110000	439110000	426830000	1073000000	472910000
sp|P0DP25|CALM3_HUMAN;sp|P0DP24|CALM2_HUMAN;sp|P0DP23|CALM1_HUMAN	89152000	78113000	149440000	160300000	220060000	186680000	411000000	288040000	113480000	120550000	21994000	45949000	73119000	168410000	64048000	110060000	56998000	75663000	90458000	80076000	107590000	115130000	215510000	70762000	77179000	147860000	110920000
sp|P0DPH7|TBA3C_HUMAN;sp|P0DPH8|TBA3D_HUMAN;sp|Q6PEY2|TBA3E_HUMAN	43954000	48602000	140170000	355800000	138920000	138240000	494950000	363880000	136110000	56283000	140210000	123900000	58586000	99198000	44216000	118370000	183380000	131900000	80465000	51699000	102150000	71182000	45037000	184910000	45125000	310690000	29006000
sp|P10909|CLUS_HUMAN	5532100000	7839800000	6134800000	19603000000	13121000000	10215000000	12168000000	13832000000	3767400000	10390000000	6202900000	10090000000	6088400000	4999000000	3580100000	4280200000	5301500000	3154500000	4925700000	3232100000	5413400000	3940000000	1717700000	9264500000	5862100000	10533000000	8059400000
sp|P11021|BIP_HUMAN	52909000	62549000	85539000	361610000	269230000	129240000	279360000	501750000	55739000	113750000	40930000	146580000	41326000	113880000	73291000	114790000	735090000	64762000	45782000	18531000	32979000	59882000	14258000	82991000	78348000	246520000	30476000
sp|P11047|LAMC1_HUMAN	67165000	7667800	95443000	381860000	157540000	96606000	106740000	201080000	115680000	264090000	132370000	157270000	156540000	91560000	60173000	69114000	63756000	77827000	62982000	113600000	92762000	66032000	72178000	92526000	97948000	185920000	104180000
sp|P11142|HSP7C_HUMAN	41562000	53193000	44089000	66947000	163680000	100020000	68826000	129940000	98577000	71458000	60350000	84842000	78354000	85585000	71031000	70112000	101290000	71210000	43263000	71888000	64544000	104390000	107460000	22764000	72881000	82534000	39624000
sp|P12273|PIP_HUMAN	13634000000	13073000000	5350600000	33904000000	35261000000	12939000000	14456000000	12400000000	8320000000	20101000000	8888100000	12723000000	13494000000	18621000000	8928000000	20358000000	11762000000	8049100000	13064000000	12024000000	11453000000	5207400000	3473500000	19366000000	9667300000	11665000000	7949000000
sp|P12277|KCRB_HUMAN	147340000	230870000	138550000	456340000	373390000	553510000	368990000	213920000	332420000	193250000	186580000	189270000	245000000	300930000	179580000	282990000	400810000	245050000	231680000	371160000	410720000	259370000	402690000	194440000	193890000	339450000	137010000
sp|P12821|ACE_HUMAN	61025000	81586000	71148000	142060000	122970000	122060000	187430000	148190000	100390000	102830000	64574000	96353000	72995000	75144000	48638000	104520000	40189000	77927000	31148000	67694000	52718000	54164000	35561000	116310000	52035000	138650000	83484000
sp|P13645|K1C10_HUMAN;CON__P13645;CON__P02535-1;sp|Q7Z3Z0|K1C25_HUMAN;CON__Q7Z3Z0;CON__Q7Z3Y8;sp|Q7Z3Y7|K1C28_HUMAN;CON__Q148H6;CON__Q7Z3Y7	42144000	32173000	20775000	59998000	33928000	17744000	31857000	3509100	39222000	38151000	33127000	78980000	84733000	14238000	110680000	7591200	19904000	18569000	15178000	32340000	16064000	18546000	28787000	6835000	48491000	24566000	15286000
sp|P13796|PLSL_HUMAN	100870000	87624000	93348000	265490000	157800000	207150000	385340000	245450000	128370000	169920000	114850000	116400000	80465000	76550000	111690000	83541000	121250000	65778000	89587000	68991000	110040000	122230000	88273000	165390000	209510000	356580000	99162000
sp|P14384|CBPM_HUMAN	48448000	28289000	42829000	146550000	43060000	97423000	102130000	98042000	86086000	71567000	68106000	127070000	110700000	113410000	95066000	120080000	340740000	85023000	54704000	54458000	37493000	70653000	53842000	99100000	29323000	26522000	45375000
sp|P14555|PA2GA_HUMAN	73696000	65640000	68822000	16515000	82730000	105490000	141950000	688140000	54844000	7739300	68267000	84184000	240020000	46106000	5823300	208230000	80601000	323100000	47418000	319290000	425800000	21327000	24930000	7497500	15992000	101620000	393420000
sp|P14618|KPYM_HUMAN;sp|P30613|KPYR_HUMAN	74553000	80703000	69207000	212920000	162510000	119840000	216210000	124040000	106150000	62151000	61376000	93036000	120270000	143870000	80174000	103210000	148430000	127660000	87338000	71854000	120460000	111840000	89143000	111570000	114240000	157350000	56604000
sp|P14625|ENPL_HUMAN;sp|Q58FF3|ENPLL_HUMAN	167050000	190880000	280540000	1111000000	494880000	578890000	1273500000	1827300000	259320000	426500000	171030000	486860000	236460000	357650000	293960000	543030000	2594200000	315370000	202610000	117010000	276330000	194620000	213390000	372130000	405600000	1201200000	193300000
sp|P15144|AMPN_HUMAN	272420000	201500000	176660000	780600000	363320000	725970000	672830000	1116900000	386500000	722760000	845250000	494500000	417420000	1211000000	508570000	642860000	828280000	499620000	291960000	695330000	468610000	338500000	749280000	556980000	245210000	528030000	612420000
sp|P15309|PPAP_HUMAN	7281300000	7091000000	5610800000	41537000000	18173000000	30236000000	20782000000	27542000000	21134000000	18976000000	11334000000	21148000000	4937200000	20973000000	10553000000	16728000000	20403000000	12238000000	7258700000	14333000000	7632300000	6611900000	6814500000	9363200000	7346600000	25122000000	9864300000
sp|P16035|TIMP2_HUMAN	106810000	76942000	60710000	337750000	158190000	221080000	124490000	85751000	98993000	136550000	68723000	115550000	113180000	30755000	79775000	52350000	62494000	68445000	39902000	61893000	65896000	28275000	30153000	56233000	59143000	138990000	142340000
sp|P16870|CBPE_HUMAN	866140000	625560000	641550000	2581300000	1430400000	1794700000	1181400000	1573500000	1342300000	1346100000	868200000	1842000000	1380500000	1919800000	1015800000	2355800000	1366400000	985060000	832230000	830110000	829230000	972880000	982160000	1416000000	633560000	879820000	857910000
sp|P18065|IBP2_HUMAN	29739000	41348000	11775000	214140000	82260000	67290000	81287000	29772000	17085000	36097000	25421000	116470000	70002000	24514000	24139000	32831000	42392000	14915000	2916200	4220100	6427100	7716100	3721300	89171000	30370000	77599000	62303000
sp|P19652|A1AG2_HUMAN	67825000	67539000	528410000	106150000	80652000	44419000	294750000	139760000	101650000	239580000	75529000	281070000	71190000	325750000	557550000	276610000	310740000	165060000	291710000	72195000	86342000	51502000	289850000	28349000	289740000	130920000	132660000
sp|P20142|PEPC_HUMAN	2602700000	4366900000	3666300000	794880000	6909800000	9819700000	5664400000	8198500000	2928000000	4184900000	1393000000	3409700000	1839500000	1929500000	4170400000	3704800000	1074000000	1352300000	2434600000	1393300000	667900000	1260300000	810500000	2418500000	2011800000	4207700000	4810300000
sp|P20151|KLK2_HUMAN	405510000	538800000	552890000	1482800000	125880000	471210000	608280000	884260000	836040000	591020000	616220000	506520000	927650000	743960000	581870000	743600000	353630000	775880000	496600000	483520000	209380000	737100000	175780000	80290000	183110000	1109900000	375970000
sp|P21926|CD9_HUMAN	216890000	125220000	355500000	805620000	160970000	352760000	323080000	574470000	697200000	538190000	112680000	404690000	206810000	552840000	308770000	358580000	535910000	259570000	180510000	393550000	229640000	318860000	147560000	509840000	144480000	786100000	388320000
sp|P22692|IBP4_HUMAN	49248000	7248200	66803000	91806000	75561000	37174000	63753000	36408000	23861000	43346000	29042000	82005000	34791000	33073000	3953700	29323000	24075000	17380000	23144000	23885000	19444000	2140600	3317100	110600000	20472000	88003000	35988000
sp|P23284|PPIB_HUMAN	135520000	78292000	130750000	518050000	465410000	273560000	253110000	223220000	68560000	227160000	155770000	388100000	156540000	88434000	76071000	133740000	151490000	140290000	95112000	145620000	147010000	143150000	118920000	212720000	105740000	237810000	234010000
sp|P25311|ZA2G_HUMAN	1854200000	2766300000	1377800000	12577000000	7888500000	3823200000	2298300000	4094100000	7740300000	2749500000	2527200000	2930000000	5673000000	5812800000	4157200000	2620700000	2414900000	1242700000	1445200000	1450300000	1328800000	646790000	1838800000	2712200000	3900800000	2919600000	2954200000
sp|P27348|1433T_HUMAN	25069000	23521000	14848000	32063000	61244000	20186000	40381000	35038000	45199000	22912000	32652000	50232000	42678000	7463900	25829000	22775000	62282000	36345000	20300000	27719000	51348000	39306000	40381000	45372000	18184000	38769000	20804000
sp|P27487|DPP4_HUMAN	94463000	92591000	91190000	288540000	88768000	175980000	189070000	151840000	99854000	87815000	120890000	112480000	134310000	176820000	43269000	87031000	84128000	103540000	128660000	118400000	143850000	98406000	130870000	89903000	60819000	138730000	120070000
sp|P27797|CALR_HUMAN	16382000	24063000	24849000	178610000	95000000	65555000	185750000	288790000	31265000	77011000	34865000	107280000	40298000	19606000	19481000	12525000	431930000	19962000	10707000	5555600	14973000	11761000	9771100	64944000	74321000	147620000	25073000
sp|P30041|PRDX6_HUMAN	86734000	90971000	69165000	191480000	162440000	163320000	176420000	179200000	138640000	70760000	101700000	202580000	147530000	85830000	65868000	82139000	113220000	106290000	134380000	128670000	114820000	168380000	126310000	63803000	86182000	128350000	97083000
sp|P30086|PEBP1_HUMAN	120050000	152310000	128970000	323530000	270500000	239320000	238970000	319880000	236850000	136760000	135760000	224880000	240970000	233880000	168460000	181890000	285950000	173220000	186090000	195940000	199210000	208940000	218400000	155380000	145790000	246900000	122790000
sp|P30101|PDIA3_HUMAN	30284000	45306000	52467000	112040000	77412000	48969000	132580000	214650000	35089000	57218000	41856000	111100000	48026000	40956000	24448000	54063000	295430000	49601000	24223000	14947000	28028000	24256000	23080000	64598000	69298000	148640000	31809000
sp|P31949|S10AB_HUMAN	31214000	24558000	54024000	105920000	82463000	79562000	150770000	67632000	60278000	36536000	62848000	97984000	114200000	71822000	41914000	46770000	102210000	29121000	37360000	42833000	46269000	59602000	58978000	64929000	78900000	46959000	36916000
sp|P32119|PRDX2_HUMAN	78513000	113540000	50665000	136360000	204860000	164480000	66250000	96482000	145550000	160320000	121770000	74600000	149420000	133410000	93539000	130770000	52759000	77198000	75626000	68883000	59869000	67868000	76785000	82439000	57028000	114720000	88703000
sp|P39060|COIA1_HUMAN	41437000	42385000	89762000	228650000	96057000	170090000	172770000	153900000	32735000	129560000	48618000	51068000	47381000	97517000	16841000	105380000	103080000	29430000	48482000	33003000	17852000	30353000	44411000	100960000	27010000	119740000	41971000
sp|P40925|MDHC_HUMAN	62696000	64469000	44997000	98627000	83717000	104490000	81540000	114200000	68496000	46789000	102850000	95670000	68398000	105600000	72477000	53298000	41424000	68131000	57128000	82508000	80606000	73778000	78566000	53272000	65795000	110210000	56316000
sp|P41222|PTGDS_HUMAN	206610000	259940000	225110000	1064800000	577030000	514140000	959890000	1085800000	116800000	782750000	187800000	584320000	124310000	2043100000	275520000	538750000	507280000	461880000	100620000	100130000	208610000	73603000	753690000	943190000	202590000	577160000	207340000
sp|P49221|TGM4_HUMAN	1376200	348540000	2067300	679830000	3996100000	926370000	281260000	431550000	25522000	667920	268050	180540	1993900000	1025200000	853100000	631320000	287370000	391280000	1162000000	335340000	470360000	323180000	363860	674530000	624350000	2011600	491400000
sp|P49327|FAS_HUMAN	56709000	61363000	40076000	120060000	88381000	114280000	84614000	88155000	197830000	76857000	62482000	78643000	97357000	109730000	118450000	111180000	77865000	79873000	44473000	44300000	55195000	67651000	58462000	66911000	49334000	112240000	61504000
sp|P49913|CAMP_HUMAN	129540000	223340000	202710000	439080000	84915000	310560000	250760000	217280000	120620000	202970000	84204000	103430000	33768000	117100000	157470000	59532000	165540000	63015000	127660000	55600000	131410000	195890000	92155000	91577000	293960000	372590000	93069000
sp|P50395|GDIB_HUMAN	34987000	44720000	24559000	68016000	83330000	41945000	111060000	49190000	60485000	39443000	37802000	70938000	71902000	110520000	36663000	9699100	68957000	43746000	34932000	40974000	57043000	33195000	26125000	44062000	43560000	82397000	41524000
sp|P54107|CRIS1_HUMAN	4575100000	2596700000	5250500000	11301000000	9995000000	12107000000	25868000000	6418900000	2935200000	5599400000	9348200000	4624000000	1453300000	4683300000	1656200000	4114500000	6828000000	1399600000	2196400000	1450900000	2603300000	3364400000	2069200000	6596600000	1067800000	13419000000	2261900000
sp|P54652|HSP72_HUMAN	32172000	38175000	60951000	263260000	114550000	97166000	269240000	264710000	78063000	50695000	103760000	153000000	47440000	164830000	97391000	143000000	400060000	73131000	64347000	56531000	97843000	99467000	95374000	128530000	95245000	221580000	22561000
sp|P55072|TERA_HUMAN	24739000	36176000	32810000	73016000	72892000	40949000	103020000	75653000	51370000	37162000	36236000	57965000	38710000	37717000	28532000	122680000	178410000	50856000	32457000	30818000	45720000	39201000	39266000	58471000	42990000	72976000	22199000
sp|P55268|LAMB2_HUMAN	86687000	51056000	84162000	201970000	162910000	123670000	106000000	98299000	106030000	191290000	81136000	121690000	114890000	56755000	83364000	75283000	70741000	58197000	44480000	101910000	78633000	45162000	53601000	65046000	72602000	159690000	94055000
sp|P60174|TPIS_HUMAN	185650000	218300000	218310000	600350000	369620000	393090000	576410000	318960000	257130000	233470000	207680000	310790000	313950000	312290000	220060000	160210000	182320000	202300000	155410000	193960000	234570000	163760000	225950000	209650000	194270000	440590000	159660000
sp|P61916|NPC2_HUMAN	1374200000	1326100000	2739500000	7198700000	3924300000	6400300000	11870000000	4408000000	1993200000	2944100000	3134900000	3855300000	1843300000	2142800000	2224700000	2286100000	5159300000	1211200000	1783900000	815630000	1023400000	1584100000	1754900000	2924500000	2346500000	6922200000	1944200000
sp|P62258|1433E_HUMAN	205530000	283680000	194700000	267540000	256500000	241760000	305130000	395870000	356730000	235860000	337610000	529610000	516870000	818780000	290650000	532660000	374320000	294450000	206790000	270440000	303550000	412310000	417400000	375810000	252550000	377560000	194330000
sp|P62937|PPIA_HUMAN;sp|Q9Y536|PAL4A_HUMAN;sp|P0DN26|PAL4F_HUMAN;sp|F5H284|PAL4D_HUMAN;sp|A0A0B4J2A2|PAL4C_HUMAN;sp|A0A075B767|PAL4H_HUMAN;sp|A0A075B759|PAL4E_HUMAN;sp|P0DN37|PAL4G_HUMAN	44756000	18177000	25931000	158310000	104980000	97260000	75199000	96036000	80005000	41836000	81977000	111930000	78527000	89757000	65607000	63771000	120590000	44570000	34717000	56019000	58883000	43956000	35137000	47494000	46858000	51910000	37936000
sp|P62987|RL40_HUMAN;sp|P62979|RS27A_HUMAN;sp|P0CG47|UBB_HUMAN;sp|P0CG48|UBC_HUMAN	136410000	92399000	114380000	719660000	326980000	524980000	456690000	410680000	187610000	246760000	72917000	239830000	90167000	295510000	131590000	127350000	129370000	59618000	135280000	204610000	168210000	156420000	146620000	21378000	105490000	262350000	170410000
sp|P63104|1433Z_HUMAN	62118000	66707000	61076000	94445000	80642000	81628000	108660000	114390000	76234000	46170000	78226000	118670000	134800000	82847000	62453000	71179000	114530000	83661000	57935000	60634000	74210000	69510000	88691000	65718000	68183000	85404000	56993000
sp|P63261|ACTG_HUMAN	445070000	441910000	753700000	1336000000	565980000	1045900000	1843900000	1056600000	534160000	668640000	591710000	851850000	627660000	462260000	458480000	416660000	760340000	478210000	541510000	420670000	664890000	455690000	552760000	591470000	1265300000	1433100000	417210000
sp|P68371|TBB4B_HUMAN;sp|P04350|TBB4A_HUMAN;sp|A6NNZ2|TBB8B_HUMAN;sp|Q9H4B7|TBB1_HUMAN;CON__ENSEMBL:ENSBTAP00000025008	55694000	68346000	108330000	304860000	281130000	205040000	581120000	419650000	169680000	146270000	193100000	165770000	94428000	150290000	56774000	174750000	278340000	156990000	77462000	93759000	119460000	75257000	67853000	211830000	62280000	354050000	39951000
sp|P80303|NUCB2_HUMAN	253990000	183660000	277130000	905160000	969390000	352310000	574740000	361830000	283230000	702240000	112820000	633650000	354980000	324870000	245860000	396960000	310340000	223050000	169790000	172040000	239180000	141910000	94067000	429280000	118180000	271390000	139350000
sp|Q02383|SEMG2_HUMAN	14728000000	37447000000	35272000000	41669000000	66311000000	30461000000	40151000000	33478000000	19191000000	70514000000	11108000000	61346000000	45306000000	25860000000	10037000000	27970000000	15017000000	10866000000	14132000000	12145000000	6872600000	10440000000	2085500000	28092000000	20431000000	22124000000	22271000000
sp|Q02809|PLOD1_HUMAN	53277000	65356000	54204000	106460000	73086000	52145000	115540000	37716000	25161000	75099000	38436000	59135000	29441000	83155000	93158000	72799000	64918000	32167000	43024000	55986000	50307000	18574000	13162000	134880000	12811000	58007000	60270000
sp|Q02818|NUCB1_HUMAN	99078000	101050000	125520000	370500000	303330000	111860000	82444000	121970000	69737000	208030000	37038000	205090000	56596000	27223000	128100000	16524000	80861000	45437000	48941000	42140000	37570000	14541000	14749000	298600000	42099000	97726000	85518000
sp|Q04609|FOLH1_HUMAN;sp|Q9HBA9|FOH1B_HUMAN;sp|Q9Y3Q0|NALD2_HUMAN	77548000	47048000	38832000	117990000	33723000	50722000	46504000	34914000	55468000	21891000	44801000	30805000	53637000	256010000	8755800	83985000	101920000	34697000	27254000	82568000	93061000	56176000	25561000	164480000	19512000	70048000	76812000
sp|Q04760|LGUL_HUMAN	54782000	54590000	22972000	129520000	120290000	70609000	88972000	50481000	70758000	61564000	84247000	81411000	127950000	69795000	31254000	79615000	32193000	58061000	70150000	43480000	50136000	43542000	37445000	44651000	31004000	65484000	43233000
sp|Q06830|PRDX1_HUMAN	116640000	139160000	150840000	409790000	207430000	159110000	196050000	194570000	179610000	103560000	157030000	214940000	205100000	223280000	125900000	172750000	250250000	151170000	120150000	143100000	104580000	142160000	199560000	228830000	95628000	178370000	128900000
sp|Q08380|LG3BP_HUMAN	992360000	1393700000	1537000000	5425800000	2785400000	2039200000	1921100000	2517300000	1246900000	2013200000	978250000	2237000000	928360000	2494800000	1681800000	1692400000	2177900000	1061000000	1138100000	782820000	1144200000	802880000	766450000	2558700000	1425800000	1877900000	1744000000
sp|Q08629|TICN1_HUMAN	30041000	24586000	35209000	70715000	15696000	46138000	77180000	85458000	89343000	32971000	33005000	50104000	46680000	92119000	12378000	78441000	44789000	41955000	35502000	33145000	32008000	39734000	17522000	15827000	21025000	83064000	24171000
sp|Q12841|FSTL1_HUMAN	119010000	55271000	219900000	344400000	151060000	160420000	231960000	188270000	155050000	230670000	103860000	137720000	183370000	118490000	72188000	117130000	97005000	77933000	77008000	96512000	100290000	74521000	94562000	68597000	63768000	355410000	161050000
sp|Q13332|PTPRS_HUMAN	73531000	63491000	88208000	225900000	77509000	195470000	88510000	144010000	90586000	65997000	71370000	94695000	83998000	326670000	81158000	90048000	127420000	94290000	67340000	120360000	81258000	80163000	83892000	88196000	43772000	87733000	57903000
sp|Q13421|MSLN_HUMAN	82334000	60583000	84566000	555660000	248850000	1044800	171010000	108970000	146540000	45559000	10522000	163190000	125520000	50493000	129810000	3589700	256570000	3536000	2456300	81755000	127320000	1443400	19149000	263740000	29269000	11266000	7405500
sp|Q13438|OS9_HUMAN	35752000	62562000	29282000	78591000	79484000	32597000	129750000	31372000	55473000	348360000	23132000	153640000	78908000	29321000	27793000	77676000	13372000	18435000	17586000	19753000	18387000	8649300	6544400	101630000	67044000	93549000	99054000
sp|Q13449|LSAMP_HUMAN	149040000	75673000	55393000	248530000	84071000	191030000	87283000	218070000	140000000	87334000	222600000	207820000	160680000	117410000	78275000	60651000	64010000	138360000	79605000	191020000	117830000	103890000	198210000	41857000	53795000	82752000	77386000
sp|Q14508|WFDC2_HUMAN	444400000	355120000	997370000	2016300000	2232800000	1037300000	2912400000	1303400000	640980000	602650000	405080000	976900000	965640000	928130000	1252100000	320950000	1544500000	78885000	141360000	90032000	145270000	103990000	2528200	2385400000	680900000	833010000	1283000000
sp|Q16610|ECM1_HUMAN	677760000	350360000	703550000	1399000000	1411000000	1362600000	2488100000	1452000000	255420000	760420000	428030000	600390000	258880000	757610000	423550000	403050000	1196200000	186750000	360190000	220640000	297800000	490980000	272240000	1105000000	291330000	1204700000	365800000
sp|Q16651|PRSS8_HUMAN	131930000	67548000	188590000	940290000	198960000	308520000	286660000	353840000	200510000	205740000	193420000	211090000	159050000	248270000	179120000	181380000	306920000	117170000	135180000	155990000	187750000	142460000	135660000	163490000	62024000	290740000	138480000
sp|Q53H76|PLA1A_HUMAN	137660000	140020000	149930000	244110000	100980000	141790000	163340000	233770000	68644000	122130000	108730000	113870000	65469000	38640000	85795000	44378000	113220000	74224000	145030000	62196000	148820000	94614000	64902000	143090000	66857000	191450000	94014000
sp|Q5JQC9|AKAP4_HUMAN	897260	140870	46447000	248690000	73774000	42158000	326830000	195880000	94346000	19348000	33071000	31753000	1205900	57503000	436380	32660000	58066000	112950000	34786000	1833400	21348000	1058700	530860	127830000	6564400	334770000	1669500
sp|Q5VTE0|EF1A3_HUMAN;sp|Q05639|EF1A2_HUMAN	108670000	139220000	123730000	176050000	163110000	252520000	261430000	239700000	208940000	97147000	114380000	209070000	218160000	163370000	86308000	133330000	290980000	166250000	110170000	141230000	198390000	155720000	173020000	79809000	121870000	226300000	116470000
sp|Q6PCB0|VWA1_HUMAN	233430000	483690000	438770000	1103200000	625900000	335330000	461920000	544310000	170200000	717360000	255730000	472580000	442890000	338780000	516180000	325860000	79025000	155520000	219510000	218950000	223870000	115050000	37860000	633020000	234140000	497360000	451490000
sp|Q6W4X9|MUC6_HUMAN	2557500000	2610300000	1646900000	4623000000	4394700000	2002900000	2322300000	2089900000	1183800000	2787900000	1533900000	2972800000	3399900000	1746800000	1728800000	405210000	1174500000	461970000	1257500000	1033300000	1862700000	1227100000	907920000	2337800000	1355000000	2561400000	2592200000
sp|Q8N6Q3|CD177_HUMAN	242670000	16530000	202510000	1151400000	219270000	954730000	1126300000	919660000	180860000	409040000	108070000	618640000	702340000	474080000	120830000	450410000	243640000	377660000	331100000	213280000	170290000	139220000	310380000	114440000	85530000	416780000	98792000
sp|Q8WXA2|PATE1_HUMAN	30120000	16250000	26965000	150840000	51849000	73505000	87488000	67024000	36392000	36854000	24392000	115490000	14334000	14309000	69163000	97640000	81103000	11339000	14933000	26661000	14126000	6371800	3409800	82696000	3688900	72470000	12533000
sp|Q92896|GSLG1_HUMAN	57547000	53091000	56671000	127700000	43920000	69093000	64886000	63781000	72931000	90241000	49233000	59904000	67796000	113960000	47376000	142010000	54629000	20718000	17104000	16301000	18120000	20885000	14772000	43797000	19195000	59251000	69698000
sp|Q99497|PARK7_HUMAN	110930000	82441000	108600000	285430000	165840000	171260000	188500000	225210000	168860000	147930000	104030000	116650000	111030000	138140000	78252000	72666000	174620000	104890000	116630000	130710000	109200000	101130000	99385000	99199000	65639000	199040000	78881000
sp|Q99538|LGMN_HUMAN	98998000	67384000	42452000	346310000	173470000	216560000	101990000	122390000	174030000	177250000	48439000	144570000	111200000	53771000	42998000	75927000	46291000	55491000	39877000	50162000	41815000	30385000	25493000	176310000	83206000	148770000	71086000
sp|Q9GZX9|TWSG1_HUMAN	107080000	134070000	147980000	119240000	154770000	193640000	121020000	61838000	73886000	182890000	27246000	94296000	62997000	209650000	205370000	162200000	98387000	31018000	42793000	74635000	75558000	34607000	13510000	365820000	47914000	67105000	119810000
sp|Q9H173|SIL1_HUMAN	103550000	131070000	100210000	245790000	161440000	192930000	189590000	238340000	105560000	289010000	66525000	164990000	104830000	58667000	111480000	123430000	67477000	76260000	90970000	63780000	97917000	57473000	35813000	85741000	84166000	174140000	145640000
sp|Q9HAT2|SIAE_HUMAN	37899000	32710000	26867000	96059000	66862000	73458000	70739000	65864000	44636000	52929000	34186000	60841000	37803000	36628000	32814000	23108000	41594000	31906000	32269000	43108000	28102000	26388000	23919000	29952000	33848000	78831000	35309000
sp|Q9HB40|RISC_HUMAN	66590000	75734000	53470000	57332000	58959000	80499000	176860000	72219000	31141000	61829000	46251000	116850000	50837000	26803000	51550000	77573000	24036000	69550000	50313000	44840000	60866000	36043000	20372000	67515000	27614000	82308000	38120000
sp|Q9UBX7|KLK11_HUMAN	68550000	41943000	134720000	297750000	184080000	232960000	333700000	210520000	87703000	49660000	51961000	141020000	380840000	158830000	26800000	165790000	84436000	129180000	119050000	59344000	196640000	49185000	42111000	58611000	71592000	224630000	62755000
sp|Q9UHI8|ATS1_HUMAN;sp|Q8TE58|ATS15_HUMAN	84175000	61663000	44514000	79144000	22897000	122220000	215750000	56079000	93697000	47297000	132680000	70286000	158900000	83503000	10712000	125370000	24172000	106350000	27634000	33596000	138970000	31124000	32702000	19769000	33824000	210900000	31739000
sp|Q9Y4L1|HYOU1_HUMAN	16814000	17001000	22369000	61694000	49083000	21542000	79099000	155440000	19859000	30839000	14630000	56795000	22456000	25563000	14088000	38473000	182620000	30959000	13914000	9346300	12498000	8675000	1781200	48160000	21188000	60172000	15342000
sp|Q9Y5X9|LIPE_HUMAN	174720000	40306000	21286000	120010000	84182000	159410000	109990000	55889000	151730000	133570000	44426000	158860000	76930000	51302000	152160000	226450000	93466000	81001000	48523000	57852000	17768000	17182000	10259000	279470000	41715000	73951000	92748000
	558	553	647	822	752	816	909	866	738	604	771	765	638	625	605	598	701	620	618	608	643	598	567	641	743	826	661	643

## Sheet: MV imputed proteins
	C12	C13	C15	C10	C11	C7	C8	C9	C5	C6	SCT006	SCT0010	SCT009	SCT002	SCT003	SCT001	SCT004	SCT0011	SCT0012	SCT0013	SCT0014	SCT0015	SCT0016	SCT005	SCT0018	SCT0019	SCT0020
Label	Control	Control	Control	Control	Control	Control	Control	Control	Control	Control	COVID	COVID	COVID	COVID	COVID	COVID	COVID	COVID	COVID	COVID	COVID	COVID	COVID	COVID	COVID	COVID	COVID
P07288	9618300000	6244100000	6649100000	41306000000	11822000000	23066000000	17266000000	27307000000	27727000000	29366000000	13470000000	15559000000	16697000000	19448000000	10204000000	15829000000	9711000000	6422300000	5005200000	16002000000	7346400000	4558700000	5019800000	11304000000	11197000000	24830000000	17840000000
P04279	18136000000	46622000000	49598000000	62832000000	114130000000	55960000000	59969000000	44115000000	26558000000	104580000000	18879000000	97577000000	60629000000	35019000000	12949000000	29503000000	11453000000	13718000000	15758000000	15282000000	9405800000	9979300000	2941600000	31621000000	33377000000	39100000000	35870000000
P15309	7281300000	7091000000	5610800000	41537000000	18173000000	30236000000	20782000000	27542000000	21134000000	18976000000	11334000000	21148000000	4937200000	20973000000	10553000000	16728000000	20403000000	12238000000	7258700000	14333000000	7632300000	6611900000	6814500000	9363200000	7346600000	25122000000	9864300000
Q02383	14728000000	37447000000	35272000000	41669000000	66311000000	30461000000	40151000000	33478000000	19191000000	70514000000	11108000000	61346000000	45306000000	25860000000	10037000000	27970000000	15017000000	10866000000	14132000000	12145000000	6872600000	10440000000	2085500000	28092000000	20431000000	22124000000	22271000000
P12273	13634000000	13073000000	5350600000	33904000000	35261000000	12939000000	14456000000	12400000000	8320000000	20101000000	8888100000	12723000000	13494000000	18621000000	8928000000	20358000000	11762000000	8049100000	13064000000	12024000000	11453000000	5207400000	3473500000	19366000000	9667300000	11665000000	7949000000
P25311	1854200000	2766300000	1377800000	12577000000	7888500000	3823200000	2298300000	4094100000	7740300000	2749500000	2527200000	2930000000	5673000000	5812800000	4157200000	2620700000	2414900000	1242700000	1445200000	1450300000	1328800000	646790000	1838800000	2712200000	3900800000	2919600000	2954200000
P02788	9589800000	8491900000	3167400000	12134000000	18722000000	3364600000	11926000000	14176000000	4847000000	3274700000	3725100000	11235000000	6352800000	6103700000	6940500000	4132800000	8063000000	2173600000	4667600000	6393600000	3768900000	4042900000	1772200000	10334000000	4805700000	11720000000	10736000000
P08118	2781400000	243220000	5229100000	2209100000	3715200000	4203900000	432620000	2554400000	3872600000	3835900000	661830000	4972900000	3306300000	1561500000	3193600000	4712100000	1286700000	6237300000	3560300000	9951700000	7819100000	3467700000	1391500000	66312000	424710000	979060000	987170000
P10909	5532100000	7839800000	6134800000	19603000000	13121000000	10215000000	12168000000	13832000000	3767400000	10390000000	6202900000	10090000000	6088400000	4999000000	3580100000	4280200000	5301500000	3154500000	4925700000	3232100000	5413400000	3940000000	1717700000	9264500000	5862100000	10533000000	8059400000
P02768	4597300000	4233900000	18494000000	11291000000	7365500000	5049100000	11893000000	5203300000	3139100000	4780400000	2456000000	6059600000	4356600000	7296400000	3401400000	6055800000	3714900000	9865800000	8361900000	19017000000	15621000000	12240000000	14470000000	9283300000	5013800000	9161300000	5413500000
P54107	4575100000	2596700000	5250500000	11301000000	9995000000	12107000000	25868000000	6418900000	2935200000	5599400000	9348200000	4624000000	1453300000	4683300000	1656200000	4114500000	6828000000	1399600000	2196400000	1450900000	2603300000	3364400000	2069200000	6596600000	1067800000	13419000000	2261900000
P20142	2602700000	4366900000	3666300000	794880000	6909800000	9819700000	5664400000	8198500000	2928000000	4184900000	1393000000	3409700000	1839500000	1929500000	4170400000	3704800000	1074000000	1352300000	2434600000	1393300000	667900000	1260300000	810500000	2418500000	2011800000	4207700000	4810300000
P61916	1374200000	1326100000	2739500000	7198700000	3924300000	6400300000	11870000000	4408000000	1993200000	2944100000	3134900000	3855300000	1843300000	2142800000	2224700000	2286100000	5159300000	1211200000	1783900000	815630000	1023400000	1584100000	1754900000	2924500000	2346500000	6922200000	1944200000
P01033	878910000	812520000	1255900000	2423700000	1242100000	778900000	1115500000	2348700000	1434600000	1686200000	1294500000	1503700000	902680000	2173300000	967860000	1662800000	1437400000	776900000	713490000	1178900000	962900000	730790000	677860000	2224400000	721940000	1400000000	1110400000
P16870	866140000	625560000	641550000	2581300000	1430400000	1794700000	1181400000	1573500000	1342300000	1346100000	868200000	1842000000	1380500000	1919800000	1015800000	2355800000	1366400000	985060000	832230000	830110000	829230000	972880000	982160000	1416000000	633560000	879820000	857910000
Q08380	992360000	1393700000	1537000000	5425800000	2785400000	2039200000	1921100000	2517300000	1246900000	2013200000	978250000	2237000000	928360000	2494800000	1681800000	1692400000	2177900000	1061000000	1138100000	782820000	1144200000	802880000	766450000	2558700000	1425800000	1877900000	1744000000
Q6W4X9	2557500000	2610300000	1646900000	4623000000	4394700000	2002900000	2322300000	2089900000	1183800000	2787900000	1533900000	2972800000	3399900000	1746800000	1728800000	405210000	1174500000	461970000	1257500000	1033300000	1862700000	1227100000	907920000	2337800000	1355000000	2561400000	2592200000
P07602	1036800000	800610000	647450000	2716900000	2223300000	828230000	1059400000	934530000	836870000	1231200000	262220000	1402400000	1073600000	656910000	657510000	539910000	530980000	247150000	245920000	289810000	259080000	175680000	146290000	777220000	680440000	734920000	760340000
P20151	405510000	538800000	552890000	1482800000	125880000	471210000	608280000	884260000	836040000	591020000	616220000	506520000	927650000	743960000	581870000	743600000	353630000	775880000	496600000	483520000	209380000	737100000	175780000	80290000	183110000	1109900000	375970000
P02751	1795900000	1799000000	1113500000	1908300000	2713600000	4606200000	1782000000	5276000000	823870000	3924500000	689350000	1477800000	1238900000	1802600000	1237000000	1728100000	412810000	1152900000	1096100000	639740000	1659600000	1301000000	407910000	1754000000	633340000	3267400000	2539100000
P09466	2412300000	785050000	474860000	2682900000	7146800000	1775900000	3330000000	4603900000	790670000	7904800000	51981000	2647000000	2053400000	882290000	2661800000	4600800000	403930000	1497300000	117810000	2994100000	1535200000	599060000	327710000	5212000000	254390000	2457100000	6290800000
P21926	216890000	125220000	355500000	805620000	160970000	352760000	323080000	574470000	697200000	538190000	112680000	404690000	206810000	552840000	308770000	358580000	535910000	259570000	180510000	393550000	229640000	318860000	147560000	509840000	144480000	786100000	388320000
Q14508	444400000	355120000	997370000	2016300000	2232800000	1037300000	2912400000	1303400000	640980000	602650000	405080000	976900000	965640000	928130000	1252100000	320950000	1544500000	78885000	141360000	90032000	145270000	103990000	2528200	2385400000	680900000	833010000	1283000000
Q96JG6	9207300	18377000	2846881800	12087000000	4076700000	4010600000	9511500000	4003600000	618340000	6234900000	663630000	2217600000	1754200000	5498500000	3122200000	21872000000	6201600000	6927700000	1250600000	3584000000	797430000	215250000	34629000	8356400000	5177500000	1963500000	1138700000
O00391	747070000	1148400000	997480000	2888500000	1539400000	1288500000	1367600000	1269400000	597300000	1274600000	620680000	1386500000	902080000	583340000	534470000	687580000	1210200000	519250000	702930000	647940000	831780000	419010000	439350000	1667400000	730150000	974520000	926060000
P63261	445070000	441910000	753700000	1336000000	565980000	1045900000	1843900000	1056600000	534160000	668640000	591710000	851850000	627660000	462260000	458480000	416660000	760340000	478210000	541510000	420670000	664890000	455690000	552760000	591470000	1265300000	1433100000	417210000
P01009	472390000	1641800000	1805900000	1709100000	1379400000	1791200000	1631700000	1345800000	515780000	1116800000	772670000	1285900000	1133600000	779300000	863830000	804120000	396650000	723600000	703350000	468880000	603890000	138090000	176520000	1051300000	980750000	1436900000	907590000
P05154	842240000	1717900000	348110000	1381800000	908550000	1160700000	1053900000	1139600000	487380000	883840000	752430000	1006600000	999910000	602480000	754830000	728720000	831280000	586090000	757430000	972350000	1117300000	380020000	418000000	827200000	622320000	676760000	859490000
O43291	213330000	858580000	302490000	2293700000	773480000	1627100000	560660000	2433400000	481710000	466230000	921390000	694350000	282680000	24009000	19718000	43724000	166615057	107690000	171470000	147580000	193200000	152680000	150420000	260481700	714730000	2057900000	804940000
P23528	218560000	225090000	350260000	711800000	460070000	499200000	459960000	578200000	455650000	230560000	294260000	418580000	438610000	193320000	109670000	59623000	210870000	301210000	293740000	431770000	408980000	353700000	435520000	536860000	831400000	426120000	269400000
P01034	370590000	345880000	544700000	1213200000	1292300000	897210000	851800000	963510000	433600000	673030000	514500000	548280000	378180000	363000000	316050000	662060000	484640000	186220000	187760000	253540000	214730000	74155000	130970000	587210000	213770000	522390000	467940000
P06858	434850000	445620000	244910000	738530000	675310000	428360000	321920000	323480000	417570000	1251200000	247350000	746620000	326330000	559730000	325490000	403990000	451330000	345260000	409770000	214420000	311860000	158440000	66036000	732820000	316880000	443570000	234870000
O15230	351180000	50453000	410210000	981180000	549330000	282820000	455870000	576150000	414740000	759930000	274820000	349850000	358930000	267950000	243840000	284090000	217740000	232550000	215860000	412720000	406730000	158160000	209380000	335270000	224470000	731970000	338650000
P15144	272420000	201500000	176660000	780600000	363320000	725970000	672830000	1116900000	386500000	722760000	845250000	494500000	417420000	1211000000	508570000	642860000	828280000	499620000	291960000	695330000	468610000	338500000	749280000	556980000	245210000	528030000	612420000
O00584	470370000	591080000	404380000	1690600000	644870000	612190000	1093400000	864590000	359020000	667710000	252470000	301420000	404920000	526890000	196920000	369200000	510830000	175650000	174440000	154460000	234280000	156880000	95118000	517530000	263290000	626360000	249740000
P62258	205530000	283680000	194700000	267540000	256500000	241760000	305130000	395870000	356730000	235860000	337610000	529610000	516870000	818780000	290650000	532660000	374320000	294450000	206790000	270440000	303550000	412310000	417400000	375810000	252550000	377560000	194330000
P14174	100220000	181600000	78815000	853860000	899840000	641880000	602080000	898900000	347080000	755450000	205920000	260740000	298400000	875410000	242360000	347430000	784550000	55185000	82911000	104060000	247450000	160890000	92672000	1069400000	228120000	759840000	352230000
P08473	251570000	117970000	155670000	499140000	81714000	402960000	195830000	568760000	342780000	333840000	221430000	210510000	89719000	360180000	235160000	303300000	333840000	137410000	210900000	227370000	136800000	147980000	184830000	200520000	126050000	750560000	174470000
P12277	147340000	230870000	138550000	456340000	373390000	553510000	368990000	213920000	332420000	193250000	186580000	189270000	245000000	300930000	179580000	282990000	400810000	245050000	231680000	371160000	410720000	259370000	402690000	194440000	193890000	339450000	137010000
P80303	253990000	183660000	277130000	905160000	969390000	352310000	574740000	361830000	283230000	702240000	112820000	633650000	354980000	324870000	245860000	396960000	310340000	223050000	169790000	172040000	239180000	141910000	94067000	429280000	118180000	271390000	139350000
P14625	167050000	190880000	280540000	1111000000	494880000	578890000	1273500000	1827300000	259320000	426500000	171030000	486860000	236460000	357650000	293960000	543030000	2594200000	315370000	202610000	117010000	276330000	194620000	213390000	372130000	405600000	1201200000	193300000
P04406	211590000	282880000	233870000	658100000	599550000	326660000	433620000	402960000	257330000	221670000	240100000	505090000	449890000	516690000	206760000	255660000	338250000	240130000	241740000	250000000	268210000	241060000	295050000	258720000	449130000	521530000	130920000
P60174	185650000	218300000	218310000	600350000	369620000	393090000	576410000	318960000	257130000	233470000	207680000	310790000	313950000	312290000	220060000	160210000	182320000	202300000	155410000	193960000	234570000	163760000	225950000	209650000	194270000	440590000	159660000
P07900	118310000	151730000	134410000	589460000	385620000	312170000	902430000	733140000	256570000	144780000	162010000	382940000	302970000	257270000	202720000	247430000	718260000	229750000	129180000	126830000	298250000	292560000	282550000	211390000	287480000	512020000	141290000
Q16610	677760000	350360000	703550000	1399000000	1411000000	1362600000	2488100000	1452000000	255420000	760420000	428030000	600390000	258880000	757610000	423550000	403050000	1196200000	186750000	360190000	220640000	297800000	490980000	272240000	1105000000	291330000	1204700000	365800000
O60635	166480000	48102000	94939000	1547500000	168010000	87561000	91843000	450090000	253240000	169280000	37041000	117630000	69063000	1093300000	224530000	582720000	309480000	118540000	11809000	355070000	175470000	65676000	11229000	454520000	61934000	211550000	246040000
O76074	155450000	188750000	55778000	1285500000	1299900000	347700000	156570000	151450000	242580000	596090000	60849000	221420000	930810000	39979567	26217638	28757080	40897856	173580000	83854000	57882000	37846000	34013000	16933000	58667680	577740000	163030000	416210000
P30086	120050000	152310000	128970000	323530000	270500000	239320000	238970000	319880000	236850000	136760000	135760000	224880000	240970000	233880000	168460000	181890000	285950000	173220000	186090000	195940000	199210000	208940000	218400000	155380000	145790000	246900000	122790000
P07339	178930000	166800000	159830000	539400000	600680000	332790000	353320000	298120000	235550000	348370000	169140000	449630000	201440000	282920000	290270000	453820000	343230000	154350000	197970000	129860000	155270000	142330000	106170000	784000000	244640000	272780000	217840000
P41271	120200000	53391000	62930000	13786000	106177000	106560000	93896000	144570000	231460000	90410700	79581000	257120000	55115000	16441000	33791733	3491100	7541200	51618000	73979000	103260000	71647000	75503000	205500000	1486700	37861000	197670000	44196000
P01036	64756000	50622000	147800000	100190000	1717000000	408340000	99109000	44130000	223760000	4308100	33612000	16265000	456680000	118410000	928300000	352640000	421540000	66504000	156680000	1074300000	12820000	15210000	2917400	85572000	410620000	35659000	232800000
P00441	24987000	253900000	58638000	1308300000	430860000	188490000	696730000	382640000	218460000	322930000	70701000	258840000	232750000	347950000	215550000	83780000	644350000	72429000	77610000	111610000	121210000	69523000	111970000	357240000	179790000	249890000	68298000
P01834	452490000	397060000	2573400000	1013000000	1068200000	592360000	1930800000	490790000	211550000	399770000	496690000	662180000	852750000	889240000	264080000	323530000	482510000	371120000	524000000	393660000	440820000	295370000	602030000	715160000	933200000	2291400000	1104100000
P01857	348500000	393210000	3154500000	2481000000	1633200000	644450000	2049900000	696570000	210810000	471610000	203880000	453910000	714970000	705680000	520620000	582030000	731590000	365120000	600660000	377030000	363300000	271620000	659480000	1265900000	528390000	1864000000	753810000
Q5VTE0	108670000	139220000	123730000	176050000	163110000	252520000	261430000	239700000	208940000	97147000	114380000	209070000	218160000	163370000	86308000	133330000	290980000	166250000	110170000	141230000	198390000	155720000	173020000	79809000	121870000	226300000	116470000
P07998	182530000	1868800000	101500000	982130000	856610000	625410000	457440000	1659800000	204740000	141350000	238320000	1734400000	248370000	821140000	228480000	250800000	631260000	151260000	302050000	118300000	334230000	259300000	81419000	775320000	109210000	785190000	404580000
P0DOY3	207560000	110820000	986020000	883950000	456000000	269090000	821640000	293480000	204450000	308750000	134150000	297090000	544670000	151820000	134510000	162420000	167940000	130920000	311230000	134570000	92645000	119290000	185110000	439110000	426830000	1073000000	472910000
Q16651	131930000	67548000	188590000	940290000	198960000	308520000	286660000	353840000	200510000	205740000	193420000	211090000	159050000	248270000	179120000	181380000	306920000	117170000	135180000	155990000	187750000	142460000	135660000	163490000	62024000	290740000	138480000
P49327	56709000	61363000	40076000	120060000	88381000	114280000	84614000	88155000	197830000	76857000	62482000	78643000	97357000	109730000	118450000	111180000	77865000	79873000	44473000	44300000	55195000	67651000	58462000	66911000	49334000	112240000	61504000
O75874	150010000	176280000	146000000	326580000	134220000	219850000	165060000	171230000	197270000	114310000	211360000	218680000	268560000	158600000	131110000	162470000	134730000	195420000	169040000	192370000	201810000	156800000	272320000	134060000	102500000	166980000	108660000
P02787	322810000	213290000	1581700000	1022300000	373450000	419760000	1125400000	527900000	192180000	372390000	207330000	432070000	230800000	476520000	225920000	584720000	181270000	504890000	179430000	143860000	244640000	126800000	229840000	647980000	581480000	1326000000	417320000
P08294	112310000	76930000	44450000	360690000	82239000	254870000	168460000	264850000	189390000	103210000	58438000	143370000	79429000	193240000	57033000	176230000	59463000	90991000	91209000	94492000	76568000	63309000	44360000	141470000	61586000	224800000	105650000
Q96A08	57171000	139050000	83647000	99782000	107170000	321320000	733910000	561480000	188290000	98643000	443230000	480930000	52817000	131590000	735410	510030000	249220000	94224000	80884000	114080000	195910000	190940000	144550000	326320000	375510000	585980000	29969000
P62987	136410000	92399000	114380000	719660000	326980000	524980000	456690000	410680000	187610000	246760000	72917000	239830000	90167000	295510000	131590000	127350000	129370000	59618000	135280000	204610000	168210000	156420000	146620000	21378000	105490000	262350000	170410000
P04075	115480000	114120000	101870000	318010000	291520000	194610000	266250000	216070000	181830000	103980000	157930000	160630000	209700000	218440000	145930000	207180000	231110000	136130000	99212000	103930000	160550000	120860000	164480000	182990000	123010000	203650000	92058000
P08758	117080000	144590000	95619000	214680000	133600000	144640000	165570000	120500000	181580000	184960000	86939000	180060000	255310000	336620000	194200000	220590000	108790000	72817000	84663000	104220000	109110000	78954000	103180000	97885000	97984000	223610000	90914000
Q8N6Q3	242670000	16530000	202510000	1151400000	219270000	954730000	1126300000	919660000	180860000	409040000	108070000	618640000	702340000	474080000	120830000	450410000	243640000	377660000	331100000	213280000	170290000	139220000	310380000	114440000	85530000	416780000	98792000
Q06481	82437000	43786600	1360800	163190000	17785000	186840000	57601000	70530000	179960000	145420000	57919000	78559000	23728000	170560000	98507000	71473000	21520000	35340670	39402000	40197740	36220000	1131600	6787800	129383056	31078322	114070000	30606000
Q06830	116640000	139160000	150840000	409790000	207430000	159110000	196050000	194570000	179610000	103560000	157030000	214940000	205100000	223280000	125900000	172750000	250250000	151170000	120150000	143100000	104580000	142160000	199560000	228830000	95628000	178370000	128900000
Q99538	98998000	67384000	42452000	346310000	173470000	216560000	101990000	122390000	174030000	177250000	48439000	144570000	111200000	53771000	42998000	75927000	46291000	55491000	39877000	50162000	41815000	30385000	25493000	176310000	83206000	148770000	71086000
Q6PCB0	233430000	483690000	438770000	1103200000	625900000	335330000	461920000	544310000	170200000	717360000	255730000	472580000	442890000	338780000	516180000	325860000	79025000	155520000	219510000	218950000	223870000	115050000	37860000	633020000	234140000	497360000	451490000
Q96S96	51785000	46866000	152800000	272750000	207200000	253400000	65911000	426010000	169890000	96844000	178150000	186880000	91835300	137460000	53853000	39272000	168740000	24901000	46542000	112960000	86711000	95192000	53089000	155210000	76655000	353530000	103310000
P68371	55694000	68346000	108330000	304860000	281130000	205040000	581120000	419650000	169680000	146270000	193100000	165770000	94428000	150290000	56774000	174750000	278340000	156990000	77462000	93759000	119460000	75257000	67853000	211830000	62280000	354050000	39951000
Q99497	110930000	82441000	108600000	285430000	165840000	171260000	188500000	225210000	168860000	147930000	104030000	116650000	111030000	138140000	78252000	72666000	174620000	104890000	116630000	130710000	109200000	101130000	99385000	99199000	65639000	199040000	78881000
Q96QV6	19987000	31953000	20297000	180020000	224400000	245130000	511240000	447660000	162140000	231060000	137060000	341420000	21681000	259840000	25841000	88243000	136520000	29111000	14958000	42761000	61644000	31595000	12073000	107020000	113600000	417960000	8441900
P07686	99909000	110530000	139460000	355450000	227520000	269330000	403540000	222050000	156490000	181280000	137110000	195890000	79782000	173490000	122060000	132060000	226810000	108190000	128400000	107580000	104810000	113980000	125780000	343470000	93412000	354180000	82353000
P00558	105760000	111540000	89674000	281010000	342720000	216940000	153540000	133740000	155860000	116860000	75291000	169310000	171280000	339210000	132600000	201010000	195760000	141040000	102900000	121150000	141870000	133760000	79793000	196070000	150190000	98771000	86590000
P01859	319370000	124070000	1346400000	741930000	364120000	518580000	922740000	571960000	155120000	243060000	99077000	150750000	274790000	795890000	138990000	458190000	238960000	249810000	205540000	137420000	232850000	178690000	306250000	1029900000	417750000	815660000	281620000
Q06828	51266000	34560000	38265000	121170000	27759000	127150000	67135000	102080000	155090000	31632000	14593000	81011000	67392000	44153000	53644000	43383800	66182000	19854000	27291000	47568000	59921000	13993000	8103400	54101000	46918000	50633000	36983000
Q12841	119010000	55271000	219900000	344400000	151060000	160420000	231960000	188270000	155050000	230670000	103860000	137720000	183370000	118490000	72188000	117130000	97005000	77933000	77008000	96512000	100290000	74521000	94562000	68597000	63768000	355410000	161050000
Q9Y5X9	174720000	40306000	21286000	120010000	84182000	159410000	109990000	55889000	151730000	133570000	44426000	158860000	76930000	51302000	152160000	226450000	93466000	81001000	48523000	57852000	17768000	17182000	10259000	279470000	41715000	73951000	92748000
P04792	95100000	142610000	81759000	312540000	205900000	121720000	76491000	130950000	150740000	155300000	132230000	247350000	139050000	200280000	112120000	156450000	130550000	87863000	76343000	139320000	128900000	122370000	152560000	92226000	131850000	137310000	72276000
P07864	88234000	90642000	183870000	715480000	426980000	243930000	1114500000	828790000	148070000	216000000	136120000	253680000	50560000	424670000	89857000	193760000	657610000	191940000	96729000	47610000	158040000	140020000	97926000	357240000	177970000	694890000	57856000
Q13421	82334000	60583000	84566000	555660000	248850000	1044800	171010000	108970000	146540000	45559000	10522000	163190000	125520000	50493000	129810000	3589700	256570000	3536000	2456300	81755000	127320000	1443400	19149000	263740000	29269000	11266000	7405500
P32119	78513000	113540000	50665000	136360000	204860000	164480000	66250000	96482000	145550000	160320000	121770000	74600000	149420000	133410000	93539000	130770000	52759000	77198000	75626000	68883000	59869000	67868000	76785000	82439000	57028000	114720000	88703000
O14773	111900000	155840000	117260000	348670000	273120000	304110000	216800000	159320000	145240000	311880000	67210000	213740000	128020000	234160000	174550000	111970000	144540000	95205000	105170000	87891000	118120000	78612000	49362000	195900000	100790000	203860000	120150000
O15393	134650000	48143000	96686000	179940000	87032000	211610000	225230000	147740000	142750000	101230000	139310000	196900000	139790000	255230000	150270000	75123000	156080000	108570000	92665000	213130000	110630000	69695000	112260000	78597000	52774000	227960000	91103000
Q13449	149040000	75673000	55393000	248530000	84071000	191030000	87283000	218070000	140000000	87334000	222600000	207820000	160680000	117410000	78275000	60651000	64010000	138360000	79605000	191020000	117830000	103890000	198210000	41857000	53795000	82752000	77386000
P30041	86734000	90971000	69165000	191480000	162440000	163320000	176420000	179200000	138640000	70760000	101700000	202580000	147530000	85830000	65868000	82139000	113220000	106290000	134380000	128670000	114820000	168380000	126310000	63803000	86182000	128350000	97083000
Q7Z4W1	103620000	85555000	53861000	213620000	144580000	125900000	132350000	167570000	137450000	162000000	159290000	189000000	143200000	76639000	24279000	39969000	16281000	97946000	94089000	153200000	121480000	163910000	130910000	68512000	69421000	127130000	61922000
P06733	101040000	99383000	97825000	320150000	197820000	154770000	306020000	225330000	136670000	129490000	102310000	175040000	172310000	232840000	99848000	137160000	135700000	108150000	73499000	123940000	143010000	113940000	117320000	166930000	169810000	212360000	95851000
P0DPH7	43954000	48602000	140170000	355800000	138920000	138240000	494950000	363880000	136110000	56283000	140210000	123900000	58586000	99198000	44216000	118370000	183380000	131900000	80465000	51699000	102150000	71182000	45037000	184910000	45125000	310690000	29006000
Q13510	106690000	124640000	62147000	131450000	213910000	77476000	115610000	66209000	133390000	251350000	84779000	240240000	31151000	115030000	113370000	135710000	81514000	110160000	85036000	106940000	89634000	69431000	87315000	178480000	73863000	148760000	89345000
P02790	255130000	220920000	643470000	301390000	181060000	244230000	412480000	248170000	129570000	198170000	148010000	241290000	214330000	550820000	125980000	380550000	263630000	449530000	446790000	330710000	395960000	175140000	449060000	473640000	180400000	382200000	164970000
O00560	72030000	64793000	38760000	176430000	44754000	108190000	81738000	134230000	129440000	80797000	90504000	101740000	95041000	155750000	94099000	111090000	75663000	78270000	70197000	114810000	87889000	56780000	68093000	77578000	34781000	103180000	78661000
P04066	100470000	119190000	44995000	193810000	105320000	193890000	210020000	159240000	128440000	161420000	60173000	128630000	52359000	125440000	96659000	77360000	96384000	59011000	57667000	59052000	85422000	40132000	59040000	198540000	83460000	108130000	122430000
P13796	100870000	87624000	93348000	265490000	157800000	207150000	385340000	245450000	128370000	169920000	114850000	116400000	80465000	76550000	111690000	83541000	121250000	65778000	89587000	68991000	110040000	122230000	88273000	165390000	209510000	356580000	99162000
A6NGU5	61635000	21772000	77630000	413150000	78123000	239600000	164330000	260730000	124210000	87517000	124390000	104240000	57462000	209040000	63515000	118650000	218890000	44510000	62315000	71885000	94331000	49425000	62378000	253730000	54040000	266420000	95157000
P0DMV9	71013000	78070000	93925000	213690000	112710000	138790000	175180000	205620000	123730000	27728000	87395000	163820000	121770000	113370000	121240000	91023000	163730000	84299000	82826000	104220000	117450000	120790000	119840000	84178000	103960000	143860000	72140000
P17066	62864000	89335000	66837000	193750000	112620000	75842000	265320000	265780000	122900000	7963700	134150000	210260000	87302000	153392000	102829000	41751000	165920000	116910000	92454000	74108000	135200000	97486000	107960000	62226000	144160000	226220000	82164000
P20337	46482000	38377000	38332000	84292000	33945000	60667000	52754000	103510000	122190000	48243000	52244000	79183000	63086000	48241000	25872000	45375000	98357000	96082000	41749000	81801000	68508000	38415000	57417000	95854000	37107000	74382000	48414000
P04083	98301000	69690000	78952000	264960000	98660000	147760000	211420000	124640000	120740000	97726000	72316000	146740000	193950000	115920000	77952000	70149000	54281000	77046000	77074000	100400000	99466000	107370000	95983000	50029000	176000000	135500000	54898000
P49913	129540000	223340000	202710000	439080000	84915000	310560000	250760000	217280000	120620000	202970000	84204000	103430000	33768000	117100000	157470000	59532000	165540000	63015000	127660000	55600000	131410000	195890000	92155000	91577000	293960000	372590000	93069000
P05067	60072000	35111000	57058000	155060000	82272000	97370000	58100000	82681000	118260000	139790000	59512000	80695000	105660000	61241000	54181000	105290000	40814000	22827000	11526000	48758000	26383000	26383000	2920700	53923000	13647000	80108000	55392000
Q8WUM4	50738000	33679000	31690000	218620000	79478000	96251000	107880000	119360000	116970000	78192000	60900000	69301000	58249000	56710000	61718000	98101000	41727000	64145000	40767000	62611000	56690000	54542000	50431000	28573000	41148000	104730000	62005000
P41222	206610000	259940000	225110000	1064800000	577030000	514140000	959890000	1085800000	116800000	782750000	187800000	584320000	124310000	2043100000	275520000	538750000	507280000	461880000	100620000	100130000	208610000	73603000	753690000	943190000	202590000	577160000	207340000
P11047	67165000	7667800	95443000	381860000	157540000	96606000	106740000	201080000	115680000	264090000	132370000	157270000	156540000	91560000	60173000	69114000	63756000	77827000	62982000	113600000	92762000	66032000	72178000	92526000	97948000	185920000	104180000
P10253	61677000	77363000	70495000	162100000	119230000	178720000	206190000	115930000	114040000	50578000	72798000	107230000	42826000	98878000	33636000	81542000	127080000	84561000	94125000	76431000	83497000	48695000	63464000	116210000	45871000	217320000	72010000
P03973	639570000	173690000	458330000	1247000000	548280000	313640000	804190000	451440000	113580000	219630000	596660000	1025100000	171070000	148900000	148250000	44712000	189240000	74545000	196020000	262250000	231090000	67723000	59608000	336240000	560970000	994280000	504690000
P0DP25	89152000	78113000	149440000	160300000	220060000	186680000	411000000	288040000	113480000	120550000	21994000	45949000	73119000	168410000	64048000	110060000	56998000	75663000	90458000	80076000	107590000	115130000	215510000	70762000	77179000	147860000	110920000
O60888	60901000	63455000	82649000	221940000	193210000	201990000	205110000	172460000	112500000	169490000	40294000	130750000	77201000	135590000	153920000	84763000	88984000	38942000	34120000	43027000	56024000	35011000	18042000	145070000	117650000	99786000	84109000
P14618	74553000	80703000	69207000	212920000	162510000	119840000	216210000	124040000	106150000	62151000	61376000	93036000	120270000	143870000	80174000	103210000	148430000	127660000	87338000	71854000	120460000	111840000	89143000	111570000	114240000	157350000	56604000
P55268	86687000	51056000	84162000	201970000	162910000	123670000	106000000	98299000	106030000	191290000	81136000	121690000	114890000	56755000	83364000	75283000	70741000	58197000	44480000	101910000	78633000	45162000	53601000	65046000	72602000	159690000	94055000
Q9H173	103550000	131070000	100210000	245790000	161440000	192930000	189590000	238340000	105560000	289010000	66525000	164990000	104830000	58667000	111480000	123430000	67477000	76260000	90970000	63780000	97917000	57473000	35813000	85741000	84166000	174140000	145640000
P07355	37978000	62680000	90087000	116010000	107980000	50563000	69765000	50223000	104730000	57040000	72257000	102450000	134950000	125750000	84582000	45447000	70229000	49289000	32646000	73472000	55823000	72041000	72257000	71037000	70405000	68146000	61274000
P52565	33275000	81233000	31858000	113980000	66078000	59347000	42061000	117030000	101730000	62098000	34687000	64421000	73594000	20321000	38551000	30295000	29109000	21749000	15100000	46387000	44641000	19537000	9119400	38925000	80265000	64489000	36817000
P19652	67825000	67539000	528410000	106150000	80652000	44419000	294750000	139760000	101650000	239580000	75529000	281070000	71190000	325750000	557550000	276610000	310740000	165060000	291710000	72195000	86342000	51502000	289850000	28349000	289740000	130920000	132660000
P12821	61025000	81586000	71148000	142060000	122970000	122060000	187430000	148190000	100390000	102830000	64574000	96353000	72995000	75144000	48638000	104520000	40189000	77927000	31148000	67694000	52718000	54164000	35561000	116310000	52035000	138650000	83484000
P27487	94463000	92591000	91190000	288540000	88768000	175980000	189070000	151840000	99854000	87815000	120890000	112480000	134310000	176820000	43269000	87031000	84128000	103540000	128660000	118400000	143850000	98406000	130870000	89903000	60819000	138730000	120070000
O43692	34712690	27378640	47268000	72103000	9049500	85147000	41584000	41529000	99724000	67814000	20539000	14833000	15018457	8164700	22552000	37002000	29227000	14214000	16996000	6626300	6117300	8196400	27774000	89708000	34249000	157100000	67050000
P16035	106810000	76942000	60710000	337750000	158190000	221080000	124490000	85751000	98993000	136550000	68723000	115550000	113180000	30755000	79775000	52350000	62494000	68445000	39902000	61893000	65896000	28275000	30153000	56233000	59143000	138990000	142340000
P11142	41562000	53193000	44089000	66947000	163680000	100020000	68826000	129940000	98577000	71458000	60350000	84842000	78354000	85585000	71031000	70112000	101290000	71210000	43263000	71888000	64544000	104390000	107460000	22764000	72881000	82534000	39624000
Q5JQC9	897260	140870	46447000	248690000	73774000	42158000	326830000	195880000	94346000	19348000	33071000	31753000	1205900	57503000	436380	32660000	58066000	112950000	34786000	1833400	21348000	1058700	530860	127830000	6564400	334770000	1669500
Q9UHI8	84175000	61663000	44514000	79144000	22897000	122220000	215750000	56079000	93697000	47297000	132680000	70286000	158900000	83503000	10712000	125370000	24172000	106350000	27634000	33596000	138970000	31124000	32702000	19769000	33824000	210900000	31739000
P34096	62497000	58689000	45290000	160240000	103910000	172330000	116000000	109300000	90711000	69860000	93951000	129820000	81125000	121310000	70795000	80891000	69959000	58403000	47192000	62148000	96766000	52903000	58495000	70821000	41097000	86744000	50196000
Q13332	73531000	63491000	88208000	225900000	77509000	195470000	88510000	144010000	90586000	65997000	71370000	94695000	83998000	326670000	81158000	90048000	127420000	94290000	67340000	120360000	81258000	80163000	83892000	88196000	43772000	87733000	57903000
P13987	102080000	104960000	142870000	469220000	285600000	176700000	425130000	180370000	90249000	227460000	73891000	147170000	107620000	62062000	61464000	53454000	93376000	38464000	31830000	28626000	34626000	20536000	4671400	104220000	99019000	195620000	81981000
Q8N114	37708000	7597900	76070000	180740000	49822000	62873000	82092000	27476000	90081000	67814000	7942400	34463000	23208000	143250000	20438000	32015000	53333000	10216167	5345800	7666700	5595200	5548200	9834900	84624000	8934700	34883970	10122990
Q08629	30041000	24586000	35209000	70715000	15696000	46138000	77180000	85458000	89343000	32971000	33005000	50104000	46680000	92119000	12378000	78441000	44789000	41955000	35502000	33145000	32008000	39734000	17522000	15827000	21025000	83064000	24171000
O95716	45393000	30815000	60118000	150900000	53346000	66332000	52558000	80579000	88954000	50394000	84865000	82522000	90575000	67639000	60468000	57714000	44071000	60615000	59306000	84549000	91221000	63184000	88885000	32366000	41210000	91215000	53029000
P08253	314870000	262710000	149530000	247910000	693120000	519340000	269790000	99240000	88038000	432030000	116770000	789240000	300770000	249300000	386430000	330590000	283910000	241960000	143780000	227270000	318940000	21046000	170370000	346680000	197800000	465140000	401400000
Q9UBX7	68550000	41943000	134720000	297750000	184080000	232960000	333700000	210520000	87703000	49660000	51961000	141020000	380840000	158830000	26800000	165790000	84436000	129180000	119050000	59344000	196640000	49185000	42111000	58611000	71592000	224630000	62755000
Q6YHK3	54211000	19076000	25557000	291220000	36549000	63806000	75402000	70300000	87299000	11293000	39615000	116080000	64764000	159650000	35792000	68486000	51180000	55797000	48375000	47412000	19175000	21545000	50126000	45189000	40377000	140120000	39867000
P14384	48448000	28289000	42829000	146550000	43060000	97423000	102130000	98042000	86086000	71567000	68106000	127070000	110700000	113410000	95066000	120080000	340740000	85023000	54704000	54458000	37493000	70653000	53842000	99100000	29323000	26522000	45375000
P20155	194100000	281610000	43433000	343380000	102080000	138100000	174390000	37929000	84985000	64812000	75952000	103210000	37669000	9674200	27885000	11582000	184630000	159880000	154450000	277720000	121730000	144720000	143360000	151960000	101680000	276970000	81117000
P42702	21505000	12392000	36914100	106630000	38015000	18190000	24465000	109270000	81973000	72877000	38384000	17915000	22514400	5577500	6639150	11594000	29088000	22764000	22582000	35169000	16468000	25995000	32598000	16676000	7560100	180970000	36813000
Q8NBJ4	170970000	32532000	51709000	122500000	20321000	162190000	94287000	114530000	80976000	53043000	29441000	78589000	80364000	124190000	12966000	68343000	69631000	53954000	2771400	6894800	53492000	34205000	34591000	62985000	18671000	48849000	27194000
P62937	44756000	18177000	25931000	158310000	104980000	97260000	75199000	96036000	80005000	41836000	81977000	111930000	78527000	89757000	65607000	63771000	120590000	44570000	34717000	56019000	58883000	43956000	35137000	47494000	46858000	51910000	37936000
P54652	32172000	38175000	60951000	263260000	114550000	97166000	269240000	264710000	78063000	50695000	103760000	153000000	47440000	164830000	97391000	143000000	400060000	73131000	64347000	56531000	97843000	99467000	95374000	128530000	95245000	221580000	22561000
P63104	62118000	66707000	61076000	94445000	80642000	81628000	108660000	114390000	76234000	46170000	78226000	118670000	134800000	82847000	62453000	71179000	114530000	83661000	57935000	60634000	74210000	69510000	88691000	65718000	68183000	85404000	56993000
Q96BH3	44218000	76799000	139390000	345910000	203134000	143080000	430870000	148420000	76178000	173410000	186700000	78398000	46344000	133040000	58345000	67327000	132810000	20352000	43146000	28092000	98269000	153310000	89952000	224250000	25034000	401780000	24960000
P11279	19401000	36352000	37697000	157230000	90982000	36556000	39260000	50743000	75129000	47626000	35568000	60754000	71401000	98762000	50370000	51665000	98593000	18620000	22325000	40569000	22630000	27087000	24631000	79976000	52697000	35222000	43923000
Q9GZX9	107080000	134070000	147980000	119240000	154770000	193640000	121020000	61838000	73886000	182890000	27246000	94296000	62997000	209650000	205370000	162200000	98387000	31018000	42793000	74635000	75558000	34607000	13510000	365820000	47914000	67105000	119810000
P02763	93556000	87455000	522620000	610080000	376750000	404150000	643740000	369420000	73255000	196730000	45798000	213050000	139970000	248010000	132790000	375890000	236080000	324030000	403440000	76996000	88504000	23523000	454350000	290950000	241630000	678410000	163830000
P13639	9347000	13207000	15181000	74335000	35113000	35194000	94778000	67059000	73132000	14940000	24559000	41261000	45439000	83278000	71965000	65328000	124410000	33700000	13642000	17527000	34459000	17195000	23698000	23031000	41635000	61627000	22209000
Q92896	57547000	53091000	56671000	127700000	43920000	69093000	64886000	63781000	72931000	90241000	49233000	59904000	67796000	113960000	47376000	142010000	54629000	20718000	17104000	16301000	18120000	20885000	14772000	43797000	19195000	59251000	69698000
P17900	30650000	23004000	17101000	50823000	71090000	18660000	21974000	39939000	72587000	58503000	18601000	42713000	42960000	20306000	5094700	19067000	32180000	16465000	12408000	9486800	12436000	11754000	7965900	28332000	39539000	46604000	27517000
P28907	73956000	51130000	78783000	251920000	101110000	167320000	65481000	179970000	71939000	100320000	91886000	177690000	79230000	111500000	51128000	119790000	54462000	69887000	47116000	87093000	59306000	106540000	41625000	12737000	70388000	72655000	53144000
P02750	94270000	119770000	97676000	276660000	265690000	120680000	175730000	188450000	71058000	160080000	76934000	116830000	95564000	62387000	103300000	133010000	130350000	57420000	64833000	59273000	75723000	57023000	24169000	103590000	70283000	134680000	138130000
Q04760	54782000	54590000	22972000	129520000	120290000	70609000	88972000	50481000	70758000	61564000	84247000	81411000	127950000	69795000	31254000	79615000	32193000	58061000	70150000	43480000	50136000	43542000	37445000	44651000	31004000	65484000	43233000
P07858	99968000	115760000	105960000	178410000	178300000	99559000	134200000	190540000	70188000	189640000	105980000	194770000	124470000	96276000	140200000	146020000	106660000	72671000	66309000	81644000	76256000	47583000	33984000	172030000	57321000	86539000	106390000
Q02818	99078000	101050000	125520000	370500000	303330000	111860000	82444000	121970000	69737000	208030000	37038000	205090000	56596000	27223000	128100000	16524000	80861000	45437000	48941000	42140000	37570000	14541000	14749000	298600000	42099000	97726000	85518000
Q53H76	137660000	140020000	149930000	244110000	100980000	141790000	163340000	233770000	68644000	122130000	108730000	113870000	65469000	38640000	85795000	44378000	113220000	74224000	145030000	62196000	148820000	94614000	64902000	143090000	66857000	191450000	94014000
P23284	135520000	78292000	130750000	518050000	465410000	273560000	253110000	223220000	68560000	227160000	155770000	388100000	156540000	88434000	76071000	133740000	151490000	140290000	95112000	145620000	147010000	143150000	118920000	212720000	105740000	237810000	234010000
P40925	62696000	64469000	44997000	98627000	83717000	104490000	81540000	114200000	68496000	46789000	102850000	95670000	68398000	105600000	72477000	53298000	41424000	68131000	57128000	82508000	80606000	73778000	78566000	53272000	65795000	110210000	56316000
Q92484	32696000	11952000	17922000	169970000	8531100	14469000	19574000	34663000	68470000	28105000	48298000	54297000	16419000	42996000	45650000	25295000	46619000	20730030	19635000	21212130	25238222	3989500	8873500	156100000	9915600	60997000	52472000
P24593	50708600	3098800	40952000	248170000	79561000	94809000	32947000	179230000	68396100	14690000	9817000	17521210	53138000	5663700	7345500	23896000	12547000	16681289	9007600	7218930	12516000	7678600	7673520	7415100	14333000	72806000	12367000
P00491	14183340	18628190	19408000	22282000	16451000	9016500	93373000	31706000	67887000	16866000	19763000	13145000	6477700	15490000	5996700	4863900	39997000	9229200	44475000	11439000	34616000	17131000	9196000	7135700	8861300	47697000	23350000
P00338	29053000	58267000	43230000	118430000	75581000	64805000	78652000	67984000	66407000	38620000	46013000	50160000	71975000	43723000	22086000	33858000	60600000	44430000	48336000	44880000	68645000	55038000	40912000	9941700	52700000	86380000	38954000
P51159	24370000	5121400	19023000	85214000	35127000	65560000	42347000	71009000	66128000	22313000	24620000	47976000	46504000	45121000	21885000	30004000	28070000	42417000	22488000	59643000	48443000	20385000	37894000	46963000	20728000	61376000	32318000
P06865	50873000	56089000	71755000	133440000	76034000	88522000	141140000	77559000	64690000	66304000	35243000	86134000	38880000	78276000	34529000	31211000	64593000	38654000	38626000	47426000	42490000	45775000	36347000	119030000	34105000	90322000	51710000
O15296	7338300	627630	1289400	31282000	2878700	6175400	1503900	11982000	63589000	16114000	7999400	8360400	9894900	920990	6882200	1211500	7621583	8154200	2671800	7433200	1161900	3799800	5121975	2807800	8286200	8093000	9544200
P48723	51293000	55130000	59792000	146760000	126910000	116430000	72168000	80775000	63255000	176140000	40661000	76966000	59687000	30066000	111700000	102470000	32325000	60884000	59501000	50633000	48465000	16443000	8908600	155890000	45721000	64174000	44731000
Q6UXI9	30843000	16116000	38557000	63848000	29002000	34182000	36990000	64766000	63207000	35877000	25988000	87304000	56034000	14771000	12386000	30572000	12702000	29644000	23266000	80662000	25856000	25886000	18885000	14550000	10261000	49314000	41157000
P52788	29356000	17265000	8944400	41884000	27970000	43527000	15367000	28841000	62939000	26848000	21800000	49914000	38110000	25690000	35716000	12462000	13612944	32079000	11465000	17148000	20453000	11179000	45373000	17604000	17428000	42778000	21839000
Q14990	9015300	29938000	35501000	38974000	83365000	32815000	75735000	37195000	62419000	12626000	23132000	78685000	12314000	38792414	19137000	2781800	48053429	97871000	19874000	3479600	34299000	8226800	15354651	395010000	19003000	135430000	12108000
P07108	56620000	45293000	48596000	193670000	115110000	89241000	72968000	114500000	61751000	61429000	34795000	102040000	49401000	178790000	85118000	39086000	138520000	24779000	38736000	47656000	37502000	36693000	66286000	45545000	34134000	111780000	33302000
O00194	31949000	12769000	30193000	52928000	16754000	59886000	28424000	62548000	61591000	27097000	23529000	32521000	35710000	55669000	23486000	22467000	13474000	38228000	36323000	44463000	62366000	39892000	52395000	32051000	18975000	44271000	30984000
P50395	34987000	44720000	24559000	68016000	83330000	41945000	111060000	49190000	60485000	39443000	37802000	70938000	71902000	110520000	36663000	9699100	68957000	43746000	34932000	40974000	57043000	33195000	26125000	44062000	43560000	82397000	41524000
P31949	31214000	24558000	54024000	105920000	82463000	79562000	150770000	67632000	60278000	36536000	62848000	97984000	114200000	71822000	41914000	46770000	102210000	29121000	37360000	42833000	46269000	59602000	58978000	64929000	78900000	46959000	36916000
P20336	33817000	18958000	23844000	47224690	9983700	4493600	37462000	52268000	59443000	33389000	32646000	31877000	29268000	62627000	17693000	35265111	19401000	46201000	48169000	67939000	84081000	63944000	97006000	31550000	39118000	54321000	18455000
P11717	38592000	17561000	31693000	97729000	9036200	51439000	47767000	102670000	59101000	32755000	64891000	27002000	17749000	66906000	18922000	30832000	40388000	22275000	14203000	43990000	43214000	8229100	13198000	11693000	10875000	68706000	20391000
P13489	12584000	8719500	7669600	35562000	20950000	21229000	65818000	23658000	58994000	26638000	10432000	16834000	29464000	13872000	24116000	7717500	77813000	22310000	8484400	11902000	13774000	11508000	6628700	12350000	22447000	34037000	18334000
Q16777	22154000	14227000	84112000	99535000	94429000	104330000	211450000	189170000	58788000	93552000	121380000	299990000	23225000	44680000	28647222	50885350	145130000	10490000	34269100	9399400	36418000	12678000	8859400	111190000	17908000	285400000	6404500
Q9BWD1	26151000	21272000	12755000	142290000	37046000	34685000	12106000	24781000	58786000	34753000	33374000	76232000	49996000	42867000	69733000	80780000	79164000	33674000	15672000	29753000	27450000	25097000	30402000	37181770	12216000	29203000	28418000
P54802	35106000	47672000	19411000	100470000	84632000	43993000	46196000	25163000	58342000	62315000	22102000	35968000	24875000	62990000	22745000	20584000	24890000	19263000	15874000	17248000	15590000	2179500	827570	20868000	36495000	65758000	41543000
Q9BUD6	15449000	33676000	31232000	141760000	79868000	32451000	23942000	100080000	57495000	60407000	53416000	19233000	47967000	38948000	98299000	58685000	61857000	31823000	10108000	144290000	50223000	23784000	42501000	179030000	58169000	48825000	112660000
O43175	18139000	16309000	19493000	38643000	49085000	33530000	22437000	46552000	56145000	26951000	33857000	42392000	46414000	60902000	25936000	58291000	29189000	38399000	31708000	38267000	38535000	27626000	16407000	17750000	19936000	31631000	22974000
P58499	50446000	67762000	19490000	93652000	54475000	87836000	79584000	95521000	55994000	37475000	67678000	101900000	52360000	85873000	29538000	52866000	46582000	31008000	58917000	47958000	51507000	22030000	10720000	131280000	42946000	64505000	42960000
P30044	20563000	27998000	12482000	76963000	85582000	30490000	71224000	61361000	55921000	13146000	21547000	42333000	44031000	38053000	40235000	54059000	35656000	25418000	16022000	22036000	21958000	16526000	16570000	28429000	36251000	59863000	23494000
P11021	52909000	62549000	85539000	361610000	269230000	129240000	279360000	501750000	55739000	113750000	40930000	146580000	41326000	113880000	73291000	114790000	735090000	64762000	45782000	18531000	32979000	59882000	14258000	82991000	78348000	246520000	30476000
Q13438	35752000	62562000	29282000	78591000	79484000	32597000	129750000	31372000	55473000	348360000	23132000	153640000	78908000	29321000	27793000	77676000	13372000	18435000	17586000	19753000	18387000	8649300	6544400	101630000	67044000	93549000	99054000
Q04609	77548000	47048000	38832000	117990000	33723000	50722000	46504000	34914000	55468000	21891000	44801000	30805000	53637000	256010000	8755800	83985000	101920000	34697000	27254000	82568000	93061000	56176000	25561000	164480000	19512000	70048000	76812000
Q66K79	134240000	69153000	64878000	236240000	142240000	185760000	210800000	57864000	55451000	249200000	71784000	92907000	123310000	59254000	96962000	147550000	50742000	61720000	42487000	44632000	68015000	30232000	33548000	273100000	79662000	165920000	116600000
P14555	73696000	65640000	68822000	16515000	82730000	105490000	141950000	688140000	54844000	7739300	68267000	84184000	240020000	46106000	5823300	208230000	80601000	323100000	47418000	319290000	425800000	21327000	24930000	7497500	15992000	101620000	393420000
Q07654	25563000	61843000	46643000	113150000	21551000	16251000	28616000	51466000	54822000	33623400	15170000	61624000	50169000	37185000	16270000	9404100	17136000	23483130	17117000	26845367	29681100	19060150	28991822	41035000	30835000	30190000	81734000
P07737	74500000	42774000	82764000	102890000	85878000	91343000	100300000	87938000	54187000	23492000	49147000	69167000	58169000	70682000	71547000	70497000	119690000	54294000	72884000	63788000	28147000	74284000	74035000	38855000	176990000	51073000	48854000
P08697	30990000	212050000	29608000	146830000	502210000	186800000	346200000	228260000	54039000	428890000	58933000	232440000	92324000	59986000	170630000	226310000	70983000	114540000	104150000	105600000	35077000	24750000	38784000	243730000	119140000	381060000	110450000
Q9UHL4	35503000	17357000	42427000	157900000	50798000	94213000	82012000	61766000	53836000	33802000	46725000	59502000	32012000	35758000	19215000	46278000	20080000	46978000	40016000	8060100	18314000	15771000	25583000	43733000	35438000	31218000	44013000
P06280	48039000	24291000	14835000	91174000	160370000	62686000	128840000	81892000	53556000	50855000	44371000	93263000	52681000	76011000	83705000	82901000	61149000	31260000	21168000	33062000	22193000	17149000	11667000	78246000	19845000	42574000	29534000
P84243	731850	23583000	16988000	136800000	122610000	44136000	759780000	316970000	53182000	27830000	8184800	28825000	1918300	38810000	2481400	22059000	139740000	14713000	5826700	6305600	11870000	6322000	13539834	78232000	80535000	106010000	4354700
Q53GD3	74280000	29145000	45643250	90419000	84668600	102880000	144770000	222340000	52094000	39065000	62640000	37885000	51008000	223920000	40859000	19564000	66512000	73366000	78107000	104790000	115400000	33740000	84490000	5433600	25474000	111500000	44051000
P13473	49786000	104280000	24038000	86130000	96442000	40030000	99211000	89030000	51792000	83312000	50086000	79036000	41125000	107300000	88559000	43652000	53868000	38856000	74601000	138400000	47869000	46382000	46186000	88815000	103480000	68813000	87572000
P02749	49094000	55498000	229040000	73782000	43118000	53373000	102850000	45178000	51515000	53933000	44017000	76428000	72267000	81041000	32889000	61139000	60843000	63167000	40529000	52957000	62894000	36902000	49543000	186710000	74768000	101070000	74056000
Q01518	43887000	52645000	28469000	111470000	53389000	27542000	103350000	53981000	51438000	52361000	36872000	66899000	52033000	45746000	112140000	65158000	26570000	43222000	38974000	24948000	29286000	35158000	35550000	39630000	106450000	73536000	44413000
P55072	24739000	36176000	32810000	73016000	72892000	40949000	103020000	75653000	51370000	37162000	36236000	57965000	38710000	37717000	28532000	122680000	178410000	50856000	32457000	30818000	45720000	39201000	39266000	58471000	42990000	72976000	22199000
P15259	27368000	28826000	62310000	383680000	176960000	84758000	357510000	250970000	51115000	9296000	64908000	166070000	90117000	108640000	16505000	74418000	54862000	41862000	27640000	20137000	40742000	29850000	32233000	20756000	30609000	206610000	15155000
P07195	39822000	44381000	26984000	65117000	35190000	39356000	68234000	63500000	50855000	62498000	55220000	73884000	66490000	82050000	38032000	67906000	69331000	50483000	45064000	54126000	60366000	63374000	55767000	9516500	33301000	66717000	36054000
P08238	11982000	42080000	29293000	89864000	68816000	54649000	75977000	101310000	50343000	18349000	44560000	54960000	74282000	54550000	64282000	52267000	85263000	47712000	37049000	33440000	32151000	62838000	64165000	46993000	30861000	60792000	30978000
P13861	29938000	39994000	20500000	195920000	62462000	34726000	71955000	120660000	49547000	32820000	22019000	37855000	22409000	9721800	18328000	7275200	27960000	21183000	15798000	29021000	27996000	39650000	36736000	51886000	35024000	61038000	25026000
Q9NRW1	29107000	20934000	33629000	2225900	36380880	37617000	33349000	52217000	49486000	28382125	43745000	49374000	48730000	34121000	13340000	24457000	34467990	62292000	48545000	61320000	73623000	59720000	107420000	48751000	25631000	61696000	76664000
P62805	14088000	16937000	101850000	114150000	90892000	42209000	438690000	312150000	49449000	14071000	62726000	115280000	33774000	82049000	1404700	14717000	89158000	14648000	10373000	15151000	27569000	14227000	9865600	7900300	165560000	122600000	3428000
P07711	63707000	69152000	85558000	111980000	67643000	106920000	104330000	85708000	47753000	90715000	39977000	94489000	50161000	30644000	40619000	42106000	37989000	11315000	103550000	73670000	45545111	22676000	33001000	94129000	50446000	121630000	46789000
P15289	26672000	55420000	32102000	71279000	53873000	25933000	90308000	43797000	46408000	38217000	37281000	20760000	16820000	40636000	48565000	24854000	19936000	28647000	30862000	14603000	27022000	12372000	9192000	55050000	20582000	63350000	14632000
P10599	27047000	15761000	17449000	63140000	55138000	35028000	48860000	60746000	45667000	31638300	39640000	43413000	44115000	54173000	20986000	28446000	36476000	31090000	27669000	24281000	42540000	22048000	40728000	65889000	65817000	74788000	7110800
P61006	14260000	18604000	22293000	71187000	39804000	37146000	33038000	61168000	45545000	23402000	21042000	31555300	25555000	54125000	33939000	27264990	26872000	22438000	20281000	39509000	66731000	2855800	86585000	22006000	27405000	57070000	19252000
Q13162	24463000	29571790	26780000	44826000	42384000	43768000	89686000	82455000	45545000	44066000	15063000	44983000	9291800	34143000	20844000	71179000	159970000	46069000	17297000	25607000	8822700	22244000	16427000	143530000	29319000	86264000	10999000
P27348	25069000	23521000	14848000	32063000	61244000	20186000	40381000	35038000	45199000	22912000	32652000	50232000	42678000	7463900	25829000	22775000	62282000	36345000	20300000	27719000	51348000	39306000	40381000	45372000	18184000	38769000	20804000
P22314	33731000	27700000	31138000	69408000	36825000	37817000	67132000	44092000	45083000	24015000	23863000	39213000	33232000	36315000	12385000	58169000	65031000	39851000	27109000	24959000	37603000	35150000	19364000	110220000	42431000	49981000	19719000
P34913	31132160	26399830	6228800	155810000	25570000	17995000	7825300	21595000	44829000	13231000	7814600	25816000	33797000	20976833	11220000	33455000	20272178	22317000	27557000	12490000	20150000	11632000	33597000	34329000	26896000	22541000	17491000
Q9HAT2	37899000	32710000	26867000	96059000	66862000	73458000	70739000	65864000	44636000	52929000	34186000	60841000	37803000	36628000	32814000	23108000	41594000	31906000	32269000	43108000	28102000	26388000	23919000	29952000	33848000	78831000	35309000
P01833	115090000	283150000	172290000	41187000	187840000	35253000	870290000	143510000	44171000	28753000	27817000	470300000	105580000	304670000	38170000	231100000	80805000	114460000	128150000	199270000	27361000	33228000	93050000	347100000	265990000	284400000	76203000
Q9Y3R5	14414000	6762600	11836000	32656000	3897800	15436000	6561200	25931000	43591000	20757000	7278400	15845000	21072000	26644000	15018000	13599000	4126100	8711300	10105000	9431900	16142000	9133200	12313000	13823000	9292300	24005000	24196000
P53396	27719000	88874000	10370000	33097000	54788000	48293000	47683000	45630000	43343000	40247000	25712000	88490000	52033000	20822000	24498000	21487000	26240000	27224000	25278000	22552000	29665000	26511000	26130000	32106156	35678000	37440000	20845000
O43278	26597000	18142000	31038000	52027000	19799000	37597000	49659000	55728000	43119000	29415000	50303000	36318000	34620000	22268000	27483000	12690000	34755000	12092000	13747000	29250000	21540000	18637000	16845000	17403000	12328000	69022000	19914000
P17405	70244000	44059000	64052000	94378000	146010000	96304000	192970000	163170000	42768000	105290000	42480000	107610000	61522000	61650000	69663000	23475000	66793000	35492000	57382000	38211000	71122000	18686000	21103000	46658000	51506000	50454000	61720000
P68036	10930000	15381000	7948500	18372000	19509000	48257000	44751000	21719100	42699000	22705522	6317300	28203000	13006833	49461000	17502800	36646000	12699850	8224678	12405000	13867000	9474300	9068900	8533300	14632000	13649000	21441000	10762000
P09467	32825000	65958000	15782000	99210000	63059000	41261000	36986000	21411000	42341000	50333000	41095000	41157000	73860000	82309000	45849000	75344000	19092000	35219000	45749000	41041000	33423000	26336000	71453000	64698000	47251000	87150000	51222000
P04004	76618000	33857000	203380000	53503000	110690000	37816000	72855000	60452000	42278000	131760000	54415000	83220000	48766000	119190000	66926000	75677000	44029000	36155000	69322000	29428000	63338000	24420000	5745500	202940000	12581000	73921000	38225000
O94985	40591000	30952000	50885000	107230000	25566000	51063000	44953000	63356000	42263000	52100000	39262000	48486000	38055000	22392000	56877000	53846000	121290000	31554000	27875000	38290000	41712000	17697000	27971000	5448400	11604000	54880000	39425000
P60953	20005000	17044000	19104000	48294000	26624000	30615000	22945000	32451000	42123000	27934000	26478000	31870000	30597000	30044000	25030000	24864000	42048000	4876800	24471000	30095000	30233000	18174000	25470000	38662000	33497000	49102000	20491000
P30153	10670000	15695000	6290000	17498000	25117000	15468000	31901000	23452000	41850000	39476000	8070000	23987000	22094000	28628000	34488000	15826000	13983000	13478150	14358000	12579000	23336000	10320000	16439000	17004000	14630000	35872000	27396000
Q9H3G5	12481000	12789000	21728000	93257000	69582000	41864000	186220000	69903000	41616000	14669000	17902000	19392000	19504488	8973000	7773840	10317450	20982000	7210300	18140000	5065300	10707000	22616000	14698000	12885000	14223000	144020000	12666000
Q14697	61963000	30365000	29261000	110100000	68458000	80033000	127560000	107070000	40908000	80000000	21325000	69500000	30462000	30945000	26697000	49986000	49210000	21916000	37320000	22886000	25667000	18164000	13044000	66189000	29649000	72807000	35661000
Q8WVQ1	38338000	32449000	35187000	57843000	27975000	31712000	51748000	55649000	40836000	56133000	27928000	44189000	25722000	52551000	31019000	38713000	48836000	35524000	46843000	57037000	42884000	24500000	46810000	26758000	21188000	30248000	30515000
Q9Y287	32235000	30179000	5605100	18065000	6766100	18124000	22406689	45502000	40645000	29239000	8305800	15222000	11181000	12529000	11588833	50886000	20635389	25418000	6024500	11539000	15163000	11075244	5004300	9298600	26405000	43088000	17149000
P21266	29799000	46002000	19154000	60666000	60521000	40358000	152190000	126960000	40536000	36473000	16979000	60656000	36659000	44079000	23184000	21101000	118650000	60267000	14443000	16698000	64127000	36169000	50636000	71869000	71308000	84313000	38914000
P49773	25413000	20594000	25042000	72567000	32166000	33865000	60849000	55308000	40373000	16523000	20030000	32738000	31252000	28148000	10108000	50041000	60126000	24907000	22489000	30836000	25741000	25746000	29673000	9113300	30228000	42488000	5031200
P49908	11744000	7205300	16347000	36602000	108590000	29542000	36575000	38000000	40255000	42022000	12880000	15634000	23488222	10483000	21436000	32073275	43035000	15419000	6286700	47738000	11514000	10613000	13184000	34836000	23683000	46420000	20515000
P06744	4482700	37309000	59334000	125030000	102040000	38371000	221400000	109910000	40050000	19500000	80232000	64527000	65594000	65915000	18920000	27969000	134610000	74503000	43291000	37320000	68581000	45365000	48827000	87772000	62852000	152130000	22534000
P18669	31273130	39027000	40331000	35660000	77365000	29078000	60898000	59283000	39903000	48515000	20786000	63082000	121040000	28233000	22293000	24095000	22298000	14469000	28041000	15135000	33288000	31907000	16185000	23859000	18946000	44562000	86416000
P03950	25075000	27985000	15892000	160180000	20285000	144870000	33834000	121560000	39357000	174180000	35487000	66881000	20376000	30061000	22615000	26001000	32094000	23645000	20493000	28542000	26133000	8615300	7043500	28074000	15743000	44429000	29131000
P13645	42144000	32173000	20775000	59998000	33928000	17744000	31857000	3509100	39222000	38151000	33127000	78980000	84733000	14238000	110680000	7591200	19904000	18569000	15178000	32340000	16064000	18546000	28787000	6835000	48491000	24566000	15286000
O43707	29985000	29613000	22153000	47367000	41173000	33490000	57201000	22466000	39215000	11400000	25578000	45676000	44685000	63892000	91694000	40357000	57418000	31807000	21429000	23767000	34487000	37111000	28086000	48974000	36755000	29247000	29059000
P35579	14417000	26958000	32025000	72260000	35583000	43182000	65675000	30194000	38939000	40623000	10438000	29186000	38494000	25821000	26880000	46305000	21870000	21348000	13403000	9445200	20511000	21269000	14253000	10714000	116950000	34409000	28887000
Q9BR76	17987000	19765000	24091000	39450000	20740000	53431000	46503000	12143000	38902000	51939000	17646000	30646000	39727000	25328125	25286611	23815783	33380111	22895000	40875000	29138000	33924000	32921000	19236000	10539000	15956000	37513000	77330000
O43286	58225000	70713000	44706000	200530000	1471800	61043000	214790000	110210000	38895000	36161000	18108000	35669000	22265000	32006000	23242000	46159900	28228000	41203000	66400000	28437000	53532000	30854000	18296000	98104000	25555000	43862000	79221000
Q02487	12294467	11165756	10341000	23898000	27714000	26106000	15164000	31016000	38370000	30187000	10145000	29267000	35614000	15772775	13076000	26765143	18666000	15546000	12126000	12034000	11562000	11485000	30998000	8203200	22339833	27739400	14532338
O75882	28820000	22245000	29434000	128160000	40073000	82157000	97952000	70925000	38322000	47663000	29114000	51580000	15078000	25094000	8406800	27831000	41829000	25730000	22094000	33371000	27038000	24209000	27493000	31066000	20011000	68689000	26226000
Q14118	34535000	66718000	38165000	171150000	66350000	60421000	59927000	83342000	38239000	43390000	17729000	30689000	31649000	32254000	36418000	10146000	21657000	23354000	47882000	30967000	23796000	16493000	7537100	33966000	20330000	38654000	34734000
Q9NS25	20436000	9231000	53883000	407350000	134290000	114420000	258900000	570470000	37755000	27918000	61401000	99102000	18317000	83039000	6881700	72762000	423810000	90415000	40204000	42897070	27402000	11352000	21083000	18035000	10686000	512760000	5286100
P68366	43567000	72774000	12816000	28717000	5098300	29440000	57204000	87173000	37346000	26185000	14635000	62336000	43729000	14358970	10318000	9331400	21814000	8694900	27348000	5915700	17118000	8129900	13543000	21624340	18213000	36575000	15784000
P02774	62630000	40729000	120400000	81943000	66601000	40374000	91623000	54605000	36510000	44872000	18464000	42837000	38257000	35641000	32009000	101260000	38444000	48932000	16683000	10718000	16953000	4975700	12347000	97849000	58124000	83053000	41797000
Q8WXA2	30120000	16250000	26965000	150840000	51849000	73505000	87488000	67024000	36392000	36854000	24392000	115490000	14334000	14309000	69163000	97640000	81103000	11339000	14933000	26661000	14126000	6371800	3409800	82696000	3688900	72470000	12533000
O00423	97583000	198802000	6424800	1175700000	594790000	557580000	374720000	631690000	36190000	462680000	29398000	228520000	235120000	22929000	21524000	70647000	246240000	101330000	40820000	234060000	58099000	164270000	23098000	114950000	64732000	199340000	189360000
Q93099	15627000	12448000	9699800	34869000	12330000	23580000	19061000	20516000	35711000	11396000	15810000	26666000	28485000	16730000	12173000	11107178	7429900	10384000	19159000	23951000	11533000	14350000	16672000	12456656	6104700	19755000	10897000
P56851	398680000	49807660	27540000	212790000	97014000	154880000	458820000	203150000	35692000	54106640	145510000	316770000	126679600	14579000	63561000	35624000	139110000	76614000	269380000	127090000	157130000	236560000	131860000	21006000	45234000	192220000	95826600
Q9HC84	623100	58979000	3327100	2465900	31228000	1029500	75076000	52723000	35414000	1820700	7240100	96521000	2527500	57715000	8763989	219660000	24756000	86165000	29580000	21289000	46740000	24115000	1100500	6910000	98600000	6400600	912860
P01876	211440000	126790000	637230000	145990000	253500000	126340000	998690000	92985000	35194000	61378000	107930000	148610000	214960000	619910000	66009000	108370000	223630000	71802000	206470000	240070000	65886000	78411000	140280000	887490000	560020000	610410000	123200000
P30101	30284000	45306000	52467000	112040000	77412000	48969000	132580000	214650000	35089000	57218000	41856000	111100000	48026000	40956000	24448000	54063000	295430000	49601000	24223000	14947000	28028000	24256000	23080000	64598000	69298000	148640000	31809000
Q9UNW1	28895000	44397000	27169000	82555000	57796000	28982000	76875000	39122000	34997000	64546000	17760000	39315000	25131000	29956000	41537000	55091000	51090000	13412000	9870800	8713400	4233200	10921000	9708800	60996000	11140000	32553000	25325000
P49189	36281000	27514000	10965000	100110000	71324000	26944000	19863000	37987000	34813000	53475000	44543000	34713000	28505000	25471000	13916000	8086400	9020500	21261000	24462000	27787000	47525000	34067000	41133000	6484500	15592000	37551000	17922000
Q01459	21968000	29877000	16814000	44629000	23111000	25262000	38536000	26133000	34618000	25535000	25128000	23049000	8925900	26732000	8574400	14805000	11574000	21833000	16384000	41695000	35643000	17712000	26055000	23099000	7869000	33404000	22291000
P09668	4928700	38209000	29372000	31576000	33663000	64875000	17987000	22915000	33879000	42306000	41476000	37173000	27779000	26482000	12555000	3743000	15287000	7324800	9202200	27407000	27798000	16162000	4961200	9851000	7160800	37553000	11843000
P10586	8341700	17992456	13665200	51192000	17312000	63120000	47524000	24994000	33736000	12054000	16197000	30174000	15087000	31878000	15532000	22061000	10401000	10824000	7859000	14128000	8898200	11380710	14588588	10546000	11052000	29131000	14342000
P07205	11503000	11708000	42333000	77753000	123690000	32007000	296270000	131340000	33546000	25760000	33564000	43188000	1797800	60943000	7499600	58279000	122200000	62383000	20910000	6436100	29677000	11262000	2339900	142200000	28718000	166810000	636750
Q9BRK5	49146000	83009000	29691000	260550000	111610000	82914000	65750000	93299000	33496000	35533000	24199000	63883000	36400000	46256770	46223000	59107000	31791000	14007000	26266000	8122600	9943000	13673000	3936800	83620000	24049000	37898000	65152000
P01011	44455000	171360000	35336000	121250000	181390000	78068000	290080000	47665000	33443000	62660000	23558000	94329000	97602000	65138000	35016000	147450000	70753000	165480000	149140000	45129000	88138000	52546000	76583000	424000000	198120000	211670000	91936000
P61019	11725000	24989000	47065000	144080000	20340000	45192000	117200000	89156000	33417000	10335000	45260000	49476000	57035000	8086600	17417000	3636600	39321000	67055000	53406000	52794000	50151000	62247000	48063000	61595000	22523000	98582000	11445000
Q9BZQ8	4586700	8833100	32008000	22070000	14105590	21198000	10998000	20966000	33175000	5618200	6380200	13892000	13118000	16122000	9291071	7608900	10861580	13200000	5012700	15114000	15326000	9540600	12924000	21216000	8036600	11591000	13716000
P11766	16866000	20421000	33483000	76894000	46653000	25764000	52130000	171090000	32855000	23418000	23778000	38230000	27081000	48679000	15805000	16785000	25872000	25282000	40731000	44329000	59079000	47414000	53358000	35566000	23862000	43888000	24149000
P39060	41437000	42385000	89762000	228650000	96057000	170090000	172770000	153900000	32735000	129560000	48618000	51068000	47381000	97517000	16841000	105380000	103080000	29430000	48482000	33003000	17852000	30353000	44411000	100960000	27010000	119740000	41971000
P09543	14365000	16622500	3321100	65470000	15693000	29949000	12041000	27999000	32654000	14097000	20965000	14828000	10854000	20518000	12836122	5500400	6109100	14608000	8332400	23797000	33882000	12685000	13818000	12175000	13820000	31290000	18885000
Q9Y5Z4	10460000	16771000	12909000	28203000	78436000	25217000	12112000	14528000	31973000	25842000	19104000	26111000	29987000	27800000	21022000	73171000	33394988	15033000	14466000	24121000	25234000	14945000	31152000	17649000	20852000	36878000	16739000
P78371	6391500	12425000	8983500	23514000	27172000	24178000	50425000	34826000	31737000	14640000	19716000	34970000	17248000	26713000	44169000	7619900	68443000	25298000	12685000	8384200	18459000	17653000	7961300	20003000	34571000	56096000	12406000
P35237	20004000	46527000	17040000	54498000	26396000	25782000	48372000	54755000	31597000	17887000	20640000	21978000	20167000	23092000	11211000	13056000	85647000	38986000	25492000	35005000	32567000	22810000	26319000	42970000	26582000	28717000	17065000
P02766	40975000	31936000	224950000	86081000	80656000	56182000	74196000	28760000	31418000	45954000	7056400	76179000	41328000	8725800	21549000	66381000	29122000	49969000	49782000	60705000	58859000	37577000	75888000	106200000	59050000	62727000	32705000
P27797	16382000	24063000	24849000	178610000	95000000	65555000	185750000	288790000	31265000	77011000	34865000	107280000	40298000	19606000	19481000	12525000	431930000	19962000	10707000	5555600	14973000	11761000	9771100	64944000	74321000	147620000	25073000
Q9HB40	66590000	75734000	53470000	57332000	58959000	80499000	176860000	72219000	31141000	61829000	46251000	116850000	50837000	26803000	51550000	77573000	24036000	69550000	50313000	44840000	60866000	36043000	20372000	67515000	27614000	82308000	38120000
Q96PH6	28262000	22043000	31787000	63474000	18141000	138860000	187800000	114900000	31000000	54288000	29777000	70244000	30557000	49151000	8512600	5549100	116530000	15282000	14250000	11468000	25194000	17276667	43471000	27186000	12664000	77353000	10179000
O43451	44382000	45382000	54151000	133970000	53176000	65802000	233210000	149700000	30873000	53832000	77714000	66164000	15473000	69440000	65766000	61726000	141280000	39098000	27286000	29299000	72330000	58938000	23773000	68798000	51410000	154760000	25811000
Q9NY33	5491800	12277000	13221467	17420000	12533000	27948000	8731400	23545200	30661000	16850000	6232000	14061540	6393900	8574100	14935000	10028000	8086200	6871600	8391830	9389700	5934500	8112900	9908600	7080400	17332000	17638000	20459000
Q9H4G4	13808000	19344200	13371000	70908000	49193000	45423000	29837000	31762000	30188000	27213000	29825000	21861000	22817000	48310000	12709000	10252000	22411000	14745000	36533000	33794000	19198000	11184000	13175000	21638000	22040000	38082000	22782000
P16070	11213830	6727400	20938000	27317000	15118000	5380500	8888800	23046610	29981000	26709000	15862000	9443000	30797000	25777000	13548000	38818400	48248000	16154000	8569700	27398000	22489000	9474700	36274000	25562000	7738600	28296000	15379000
P60660	23106000	16755000	20546000	42934000	27241000	32859000	40482000	18768000	29967000	21243000	18481000	22117000	54941000	60654000	15363000	22984000	13341000	19461000	13156000	15073000	16513000	18708000	11253000	8747600	34157000	41922000	18537000
Q13228	22833000	38249000	23750000	46512000	67531000	90946000	37027000	31061000	29870000	25299000	7365100	8854100	30480000	27812000	29406000	35481014	27609000	23278000	12532000	25678000	23329000	19707000	16892000	31705000	34945000	61932000	35796000
P05090	15327000	3264100	15758000	22418000	17079000	17748000	21991000	27289000	29514000	27742333	10511000	35093000	35301000	3357300	7824100	3213000	8684700	4828000	3986600	5345900	6560900	3211200	674480	11579000	18466000	19971970	9272400
Q15084	31023000	43911000	10027000	65419000	61189000	61408000	177100000	112280000	29501000	37190000	10963000	54645000	21641000	38164000	38025000	54176000	152200000	14803000	10067000	8301600	14992000	7221300	17465444	33834000	44970000	135980000	36364000
Q13217	6172000	23193000	4911500	112090000	19213000	36243000	15571000	78454000	29481000	11833000	7705600	46782000	16610000	26726000	29073000	61492000	8697900	10156000	14295000	11896000	17845000	4393400	4314300	87965000	9588100	19808000	53795000
Q16769	35975000	15340000	12246000	26370000	6712700	5330800	23956000	11607000	28915000	83112000	10617920	7751000	9419444	10785000	2396200	10383162	19067000	12988322	7301300	8970100	21857000	3710500	6192100	65377000	12020000	88003000	11570000
O00468	35081000	23275000	28153000	69221000	25099000	56533000	69656000	80301000	28861000	32322000	32074000	37854000	55971000	15511000	25119000	28179000	32916000	29994000	23484000	43379000	56498000	20496000	37897000	36364000	22625000	59125000	41289000
Q99519	29365000	31975000	36490000	69723000	99504000	52172000	54440000	46721000	28465000	68417000	25284000	65426000	39369000	21590000	27414000	37743000	34814000	29454000	33728000	23242000	24310000	13306000	12171000	38919000	24864000	48393000	25889000
C9JRZ8	83315000	61499000	20837000	33118000	80694000	41569000	18359000	45425000	28462180	37718000	14263000	77471000	67002000	29547000	13748000	11761000	5340600	13340000	26679000	6778600	25083000	7161300	16277000	40766000	40981000	14092000	62832000
O60701	2942000	9922200	13371000	47059000	10241000	11526000	15316000	9315900	28294000	11455000	11055000	7956300	6858900	14444000	2428700	1990100	11148000	8971800	5736700	9306400	12774000	7306200	12013000	8037300	19142000	8571200	8834400
P61224	20219000	10631000	8111400	32867000	10439000	31909000	10740000	21947000	28257000	24545000	7992600	13601000	9506700	43177000	8022500	5163900	11591000	9256700	9055200	19292000	13907000	14860000	9325200	25375000	47595000	14990000	16245000
P07237	18905000	46123000	16307000	67159000	36656000	26774000	63405000	50482000	28109000	29061000	10698000	61191000	35552000	6498000	36756000	30818000	56873000	15952000	15141000	8030600	9807800	15104000	6421600	86845000	37983000	29317000	23335000
P10323	5629300	6701600	32432000	294500000	106970000	92442000	659160000	386340000	27846000	10241000	57054000	45485000	6015300	21801000	250920	27756000	44512000	24653000	13917000	5953100	15045000	3459600	2054800	83092000	1737400	188040000	26813400
P54727	8531800	9113800	26966000	43752000	17622000	26585000	57975000	18526000	27782000	29362000	13474000	21304000	20976000	37682000	9609900	23728000	7991500	7438300	6988700	6427500	7090200	15083000	12218000	10707000	14005000	50585000	9668400
P01019	37658000	143820000	57702000	127940000	21853000	174730000	47629000	42547000	27306000	5385900	23542000	18380000	26542000	68340000	24669000	33461000	9384200	31698000	40357000	17700000	36705000	76142000	25238000	1105800	19625000	60734000	112850000
P05155	60302000	141990000	118570000	98843000	202700000	109320000	138410000	344310000	27154000	94068000	76195000	75524000	52273000	72616000	80569000	44881000	72374000	87799000	184610000	265930000	247960000	115830000	263150000	89330000	57421000	146430000	105460000
P01860	31750000	22267000	119770000	37725000	132170000	43490000	145180000	36499000	26770000	19725000	66512000	81823000	79161000	6951100	30760210	31362000	3974300	54477000	360660000	33290000	36174000	32362000	55354000	140940000	85012000	234620000	20283000
O43657	29037000	20793000	28653000	51461000	38540800	19993000	82231000	75819000	26543000	22737000	28425000	42857000	28581000	20989844	12657033	14056000	10197000	10551000	20390000	35137000	41017000	15087000	34577000	12509560	14952490	44763000	12849000
P42785	22179000	31438000	20429000	73495000	99613000	62043000	43619000	82526000	25849000	48694000	16182000	32265000	37413000	15333000	7220100	11464000	23253000	24794000	16477000	18575000	31276000	11967000	7467500	76874000	19170000	41152000	24000000
Q8NEB7	10585000	9388700	21382000	227110000	55160000	79746000	372750000	135230000	25738000	14653000	57000000	38761000	31745544	66841000	27806778	39016000	22445000	29542000	15958000	8670000	15879000	3663600	8104400	136170000	1296800	113070000	35398725
P00918	59259000	61925000	25489000	47263000	80425000	34536000	85096000	45318000	25691000	36794000	20429000	45510000	59838000	99698000	55554000	16247000	53153000	16080000	20147000	11265000	24296000	10490000	8976000	101530000	49475000	60839000	46257000
P49221	1376200	348540000	2067300	679830000	3996100000	926370000	281260000	431550000	25522000	667920	268050	180540	1993900000	1025200000	853100000	631320000	287370000	391280000	1162000000	335340000	470360000	323180000	363860	674530000	624350000	2011600	491400000
P22392	12958186	15074000	17513000	30063000	25493000	30593000	25409000	20977000	25337000	18834222	25897000	24061000	24294000	21632700	13780600	13138000	6643700	22035000	17042000	18756000	23847000	19359000	19515000	24526000	14034000	23734000	15103000
P30046	13853000	17722000	13208000	66162000	49708000	32884000	41734000	33059000	25302000	9930700	16195000	49228000	39255000	27498000	19269078	32100378	33056000	24889000	11485000	20775000	29076000	10664000	19811000	27052000	14877000	35856000	8660000
O95994	29752000	66982000	13137000	14075000	29549000	15545000	7945600	7280900	25283000	30679000	5672600	54473000	63260000	35360000	11027000	2894400	8762500	2994300	13594000	14616475	14409000	11448000	7893700	68026000	38856000	6871600	42732000
Q02809	53277000	65356000	54204000	106460000	73086000	52145000	115540000	37716000	25161000	75099000	38436000	59135000	29441000	83155000	93158000	72799000	64918000	32167000	43024000	55986000	50307000	18574000	13162000	134880000	12811000	58007000	60270000
P22234	6050800	12218325	8141600	30322000	27731000	35773000	13021000	22820000	25107000	14666000	5520600	11237000	16987000	20439000	9169300	21799000	11175000	14282000	7914300	12859470	12853890	12526000	9914533	13029443	27932000	20266000	9810400
Q9HC38	16102000	13508000	6655300	70182000	47730000	30986000	38732000	55277000	25005000	29155856	14606000	13960000	32995000	17225000	10568000	24347000	30473000	13012000	12161000	18692000	15764000	18252000	22850000	21708000	14628000	30748000	14802000
O14494	18683000	12690000	16556000	10818000	12893070	10668000	11451000	32707000	24997000	19759000	16838000	15347000	14881830	16379686	30617000	64201000	36162000	11588000	9702667	7318600	15339000	10522000	15755000	9738943	6595600	35794000	13558000
P14550	18665000	36125000	9531400	63076000	29295000	46979000	21298000	42333000	24987000	23759000	22807000	37052000	20992000	11984000	10181000	8063700	12083000	21165000	22500000	24835000	40301000	23970000	35656000	12229000	24433000	37759000	21686000
P23526	14481000	17416000	9397100	54816000	32390000	18485000	32716000	11967000	24975000	13746000	21785000	38025000	18860000	9987300	8527100	9613800	13959000	19127000	14912000	22638000	17250000	21116000	23905000	5967600	13290000	33991000	11003000
Q15435	12649000	15950000	12715320	25951000	59028000	15865000	38344000	37855000	24968000	16218000	9885600	16142000	17778000	10836000	9615860	14190000	19075000	13802000	7721700	14311000	12866000	19769000	13160000	15248000	28636000	21278000	11737000
P34059	7930700	11822000	14852000	53799000	6839700	15056000	28691000	11244000	24370000	19403000	9534300	27467000	15281000	33693000	21484000	18105788	17553517	5886700	6305800	8694600	5846300	6636000	12582000	12433000	23757000	25161000	11208000
P22692	49248000	7248200	66803000	91806000	75561000	37174000	63753000	36408000	23861000	43346000	29042000	82005000	34791000	33073000	3953700	29323000	24075000	17380000	23144000	23885000	19444000	2140600	3317100	110600000	20472000	88003000	35988000
O75969	6663400	4210400	5174600	24047000	9183200	7444400	166880000	39851000	23848000	10146000	5019900	9489000	7220900	7382400	5373234	4340900	6868800	18149000	8043400	1416000	18009000	3760900	1881900	45632000	5453700	102530000	2718700
P04264	92499000	75486000	53887000	244660000	68236000	25143000	28031000	22952000	23712000	69156000	139620000	140950000	169500000	29461000	111820000	47610000	146330000	48475000	67344000	89132000	49031000	57262000	101540000	45304000	38759000	52447000	23508000
O75976	16583000	1235900	17799420	88457000	24253000	3275400	40347000	9691900	23172000	17028000	3461000	10160000	7243133	16870000	14886000	6969617	4149100	2399400	2058100	11279000	2459400	2167200	6835000	2915700	7773500	44775000	13848000
P11684	41796000	2254600	14211000	6696000	11953000	29071000	9514700	35488000	22989000	16529575	18505000	27618000	18694000	7102133	8383425	9193738	4267700	2903600	8059700	6936300	2355000	1712000	5166300	21500000	7122400	7939400	5787100
Q8IZP9	21976000	32434000	26511000	191000000	123890000	107500000	98591000	102200000	22616000	112800000	34975000	105720000	17789000	16479000	17381000	76019000	126530000	35000000	62451000	47819000	44984000	28939756	58610000	100580000	10553000	92159000	22252000
O75503	24259000	15797000	18815000	27339000	63296000	127810000	84697000	69643000	22577000	26217000	13169000	27344000	22150000	33438000	50609000	23246000	22257000	36687000	46859000	32943000	40208000	31015000	48068000	22379000	6071100	43377000	46067000
P52209	15451000	13241000	13840000	30764000	28913000	20553000	80090000	30250000	22290000	8813500	11763000	22294000	19483000	12526000	12476000	26038000	29131000	19474000	10135000	6026400	18633000	13942000	8871200	10734925	30753000	27150000	7388500
Q9UBR2	22343429	24806000	17261000	46421000	25825000	31250000	22542000	19113000	22230000	43160000	23816000	34646000	46414000	16089000	12745000	12550000	12562000	18866000	15928000	22956000	36126000	16017000	8890600	12943000	12215000	21171000	18808000
O00469	6317000	7136700	5895800	22678000	12192000	10045000	4892300	14093000	22066000	17007000	10086000	14658000	12998000	5036100	2376200	15018800	2598500	12992000	10768000	3774300	4920600	6712889	6605678	19431000	6011400	13184000	2451900
Q9NR99	31083000	40240000	85093000	58352000	74227000	49207000	50274000	88986000	21869000	72613000	27969000	35466000	64572000	24378000	12016000	20904000	8504100	22604000	43904000	19399000	40437000	4629200	9916700	63936000	30028000	58040000	72731000
P61981	8153333	14428000	10070000	25939000	12734000	16647000	12994000	18844000	21855000	7223500	9077500	12833000	10460000	7721175	9094200	10404000	7332100	11140000	9617600	13436000	13340000	8892000	15369000	8006400	15889000	16009000	13317000
P02765	72766000	27222000	337020000	42064000	21816000	22320000	133200000	14817000	21777000	69961000	20215000	65860000	31901000	14438000	42535000	59950000	9532900	74806000	46802000	104050000	104600000	55648000	99524000	67445000	37285000	64678000	43549000
Q15907	16591000	19685000	16341000	48836000	22229000	20746000	27796000	25669000	21613000	4410500	25356000	41798000	24061000	8775400	11657000	8930429	15348000	14100000	49717000	17244000	31305000	22622000	24330000	11985000	14183000	28911000	10483000
P09972	22699000	28238000	24017000	37641000	35056000	68627000	62989000	43751000	21369000	22099000	9743200	29850000	31595000	22274000	10763000	54788000	38407000	31054000	20540000	27926000	19597000	22422000	2469000	15102244	22654000	31542000	6916600
P60900	25534000	31531000	24258000	82025000	60975000	46387000	96927000	83038000	21294000	37634100	34936000	38004000	24530000	17833000	19173270	26824000	64532000	21793000	14008000	19025000	27780000	18579000	32617000	72603000	9941500	80352000	22715000
P36873	8593400	5138100	25157000	22409000	6453300	6643200	44819000	16793000	21189000	9296700	4838700	7000700	6126600	9086600	7055200	6029433	2800900	8793400	5724500	4115200	7279800	6269900	4997600	6981900	10655000	17750000	5007000
Q99574	12549000	29182000	8449000	34128000	17372000	56815000	65038000	41390000	21144000	30999000	11014000	7838500	21725000	33190000	18043000	11761000	1125400	21487000	28492000	27265000	50773000	18767000	33310000	28729000	12536000	18208000	18893000
Q58FF8	5853400	15433000	7927700	60973000	4491700	36371000	21252000	43888000	20885000	14425000	10411000	19328000	20204000	10117000	5213000	7542100	21546000	10220580	13761000	9896560	11526000	11897000	10643980	6500400	4187500	24114000	8715600
O60568	10722000	12791000	11519000	47615000	37993000	32331000	38689000	38296000	20862000	74510000	11552000	29527000	28294000	11908000	7479700	5034100	5944600	9440400	10703000	11232000	6860300	5883200	7500300	17247000	7102300	14137000	17762000
Q86VP6	6558400	9741600	5026000	20092000	9533900	20322000	70674000	54850000	20762000	16197000	5463600	21426000	2337300	6938400	8411125	13524000	36284000	11224000	6678800	2016900	11029000	9409800	6348600	14391000	9977200	43809000	8447500
P61204	8787500	17985000	10145000	5946300	4620300	7459200	14997000	26779000	20719000	9123800	9056600	9975900	7277200	15494425	5518900	14792000	3972000	20044000	10662000	22067000	30031000	23625000	12003000	9158200	16639000	23952000	4388800
Q6UX06	20872000	14751000	7580700	25726330	10683000	9579500	75798000	10593000	20599810	3608000	2268000	3794300	12577000	10206060	9975600	3771400	26158000	3080400	17516000	17624000	20022000	1694900	12333000	55275000	19504000	17188000	4756000
Q8NHP8	11990000	11391000	10427000	54365000	11108000	23639000	21549000	22692000	20451000	33893000	17818000	18583000	8480700	18298250	17888000	7818100	24208000	12171000	8683300	21847000	12296000	15929000	7515500	29169000	21002000	19922000	18229000
P17174	27228000	14359000	8129700	57322000	22598000	57136000	126120000	72672000	20234000	18048000	18768000	41559000	19059000	68433000	26027000	24081000	199850000	12893000	8456700	1134900	9824200	9273300	8970100	75169000	12130000	61708000	9875500
P00390	14234000	16808000	20386000	37154000	20114000	31404000	23537000	29903000	20151000	10080000	47179000	46268000	27871000	35277000	13774000	4436100	26470000	15781000	29545000	31186000	36054000	31590000	32291000	16520000	20039000	22165000	15653000
Q9Y4L1	16814000	17001000	22369000	61694000	49083000	21542000	79099000	155440000	19859000	30839000	14630000	56795000	22456000	25563000	14088000	38473000	182620000	30959000	13914000	9346300	12498000	8675000	1781200	48160000	21188000	60172000	15342000
P54108	119050000	77064000	15924000	169010000	88046000	33690000	128130000	85150000	19779000	57021000	11790000	66553000	22501000	57989000	144760000	19445000	119390000	4991800	7117700	52961000	10176000	8100000	16703671	18193000	66804000	58389000	135900000
P0C0L4	22428000	59578000	497610000	30550000	36284000	46884000	269460000	69331000	19699000	32570000	14320000	75690000	23112000	28902000	50756000	219650000	185270000	201220000	50339000	20026000	64723000	90160000	56444000	96274000	101970000	199120000	61211000
P29622	4769600	10174000	3636400	33286000	29939000	24248000	101170000	18180000	19566000	18159000	12372000	66059000	16524000	18313000	11949000	3082200	9124500	7978200	9600900	6119600	6368000	4150800	10506581	13308000	10960000	150270000	28093000
Q12805	12291000	12612900	16297000	33293000	14586000	7861400	7744200	45457000	19475000	23049000	20627000	62451000	40436000	5592600	8448089	9006400	3527800	14841000	24937000	12955000	14357000	13425000	18049000	9423100	14134590	28508000	10799000
Q9Y646	14126000	25395000	20137000	79493000	157040000	64697000	34060000	45990000	19472000	44257000	26485000	29180000	13961000	25441000	8482600	16963000	6653400	23122000	19713000	44882000	37220000	18341000	20480000	35518000	21639000	51651000	41181000
P28072	13894522	28828000	16159000	34754000	6432000	40012000	64097000	37697000	19284000	16960900	30995000	30615000	26083000	14986000	13190344	26329114	17486756	19663000	11339000	16078000	21813000	17303000	22683000	3929300	7539900	31314000	12976000
P04085	5592100	31896000	27081000	20698000	9559400	12253000	9082800	23678300	19272000	27715000	9913500	11291322	11119000	16561829	4618800	9228125	4226700	13815000	28363000	21969000	23341000	20664000	9779000	10687075	9991100	10058000	10904000
O00339	29331000	58059000	60027000	163820000	96979000	89575000	86993000	103650000	19202000	120130000	39569000	84220000	72544000	25721000	45995000	42553000	3510700	15387000	35756000	43327000	51849000	10304000	4381700	93113000	31906000	87773000	102260000
P40189	13696525	20349000	27469000	45110000	15235000	30317000	24712000	14671000	18740000	11598000	23868000	11951000	11473000	23168000	18596000	19654000	6273100	15632000	20222000	21250000	17156000	10663000	10027000	18270000	10315000	21688000	11784000
Q14974	7711500	5897500	10242240	12252000	9402800	3919500	15802000	32427000	18484000	17075000	3531900	11628000	3022100	18211000	8952200	9306900	39694000	8303880	2967100	2046600	5883500	6826033	6591400	6315700	22994000	15502000	4464600
P11216	6601750	11248000	9170700	14196000	16481000	12640000	16653000	4421100	18254000	7246500	3199700	8958100	7438500	1616800	2288400	6483300	6691900	11415000	9572700	8312800	14731000	7990200	9362867	10911000	13753000	11408000	6842600
P15586	13750000	11981000	15649000	40364000	24074000	45516000	21360000	15002000	18210000	17082000	19978000	14167000	11101000	32619000	16651000	23265171	25966000	30047000	22361000	30146000	24937000	15871812	26328000	11456000	39008000	16065000	13331000
P48637	28411000	16556000	22480000	40928000	24296740	7181400	19342000	19740000	18159000	43708000	17247000	19007000	20420000	21004162	9131500	5705000	20123567	17478000	35953000	21175000	18095000	30925000	17416000	19935743	21898000	25034000	11236000
O94760	14504000	7052700	17565000	19471000	25463000	15649000	7370900	10826000	18082000	7894200	15100000	17187000	16632000	47850000	10515125	10852000	9575000	10217000	8821000	21688000	8577500	15520000	17040000	15345000	9838200	11303000	6079800
P17050	11125000	3453700	11117000	27543000	16346000	16165000	33777000	15872000	18044000	16362000	15035000	17529000	11794000	10978000	18056000	7486900	8791800	8000000	9342000	8197100	9536600	3691900	4302100	9055400	6699400	20168000	8248400
Q9H4B8	3620900	8025700	84501944	125430000	66653000	45991000	634780000	218830000	17825000	28925000	7086900	15775000	5281300	23013000	4632000	19194000	28366000	12105000	3841700	8673944	13844000	6327489	3827100	50391000	4420500	70418000	10780000
Q9BUN1	10338000	1537800	34140000	159420000	56437000	21956000	200950000	183990000	17692000	12337000	27133000	23901000	2779900	9103100	428310	6957700	10704000	6988100	4668500	4088600	6034800	934180	454470	9737700	3303800	96718000	5222800
P08134	2612500	10439000	16633000	32474000	10863000	27662000	24069000	18874000	17677000	12291000	17089000	22159000	25935000	28539000	19640000	1607900	13965000	21232000	13246000	53649000	55967000	12648000	28472000	5085900	18480000	36112000	19507000
O95399	21623000	30967000	32408000	75568000	59966000	31452000	91250000	110950000	17600000	52867000	24216000	91366000	31258000	27917000	27172000	34483000	118480000	18697000	20247170	20573100	30423950	16967062	17534000	69027589	27449000	143050000	10147000
P18065	29739000	41348000	11775000	214140000	82260000	67290000	81287000	29772000	17085000	36097000	25421000	116470000	70002000	24514000	24139000	32831000	42392000	14915000	2916200	4220100	6427100	7716100	3721300	89171000	30370000	77599000	62303000
Q8NCW5	12738000	11140000	18893000	36153000	6114400	11755000	10183000	21917000	17049000	18721000	9882100	20528000	18329000	12826000	11894000	8269257	22262000	9432900	9179900	13699000	14070000	13307000	10128000	9313600	9795400	26144000	9375267
P54289	5700500	10374000	8487300	60233000	10829000	18503000	30799000	54276000	17038000	35460000	21238000	27280000	34240000	53632000	39010000	46142000	19499000	19257000	17913000	56596000	11514000	12342000	42552000	27732000	12895000	26718000	14496000
P07741	5204100	4817000	9463300	15438000	10114000	11022000	6920000	6088100	16924000	1739700	4895270	6744900	3445100	5420945	9489225	5688133	2562500	5319500	6087700	5336800	4131500	8044300	8455900	2620432	5259200	8933100	3721200
P12110	50978000	11453000	23387000	25440000	4698000	7437800	45682000	52161000	16908000	11975000	15233000	78567000	25875000	3646700	8479000	41605000	15480000	31616000	6319000	17319000	24007000	13025000	17771000	33356580	8154000	25341000	63860000
P35080	8487300	12585910	13288478	24467000	16335000	20788000	14779000	20226000	16723000	29178000	16392000	18154000	28165000	5226100	8259257	4831400	8228200	11097000	9828700	8106800	11144000	11430000	10351038	3943800	11949000	16397000	8319100
P02743	32081243	30562912	34329000	76047000	41863000	31500000	224760000	81577000	16631000	13232000	9275800	34875000	14758000	24825000	3090500	8923400	26246000	28228000	6419000	9479200	16410000	6017900	6824100	32755000	6286500	114700000	7590700
P01861	57351000	78456000	840680000	312050000	122430000	153030000	202680000	36689000	16540000	16702000	31123000	50974000	238090000	44672000	18934233	58784000	39536000	122090000	49606000	8079700	13662000	28449000	87016000	4858100	94049000	396650000	190730000
P25789	13511975	17811000	16390000	35774000	18278000	38021000	100930000	47775000	16266000	22852000	19174000	23694000	22038000	19340000	13396000	17346000	57875000	20550000	14276000	5140300	54335000	25424000	9740600	9633500	13103000	36189000	9315800
O14818	17278000	10649000	18779000	56551000	35790000	36545000	47122000	35404000	15852000	13554000	15163000	38874000	12266000	11925000	7529800	4047400	10207000	13452000	14850000	12025000	12327000	12159000	12240000	19203000	12677000	36806000	13306000
P36268	20096000	7279700	5457500	16705000	18806556	32048000	29419000	16257000	15807000	7882600	29636000	9849100	10326000	11309000	3754100	12679200	21968000	10597000	14425000	23398000	40419000	20836000	13614000	9295700	15790656	39209000	10498000
P17987	7718371	8084867	5938800	19153000	34830000	13972000	18320000	14299000	15510000	10119000	11908000	15738000	8798100	6084600	7790900	10145467	16872000	17934000	12294000	8338800	10591000	16760000	8217000	5543500	16187000	26094000	7974400
P62879	15636000	20170000	18345000	15453000	15823000	24637000	13714000	18040000	15429000	24195000	13597000	18536000	7131000	20079000	20306000	29675000	12184571	19074000	19694000	20556000	25477000	21599000	24940000	46255000	12438000	26896000	11819222
P08571	43940000	19492000	46019000	33947000	39943000	43301000	148820000	52207000	15352000	35216000	30873000	21792000	12181000	87154000	55077000	12720000	44704000	4664300	20590000	10042000	10331000	37042000	11749000	81408000	22414000	67354000	17202000
P25787	18256000	23256000	24429000	47524000	18177000	22111000	70618000	46245000	15289000	23411000	24178000	34842000	13434000	88904000	31184000	22300000	88483000	16645000	1036800	12501000	19444000	18809000	18870000	24654000	15210000	39125000	11236000
Q15828	41156000	3103600	1278800	179620000	45643000	9204100	54363000	30441450	15275000	53952000	36076000	92339000	63270000	16948556	4303500	11778000	11917000	6157000	6631800	5508100	8529500	13472056	15929790	45564000	23237000	28766000	7679700
Q6UXD5	12144711	9269400	7713200	50106000	10405000	15812000	20878000	8377000	15013000	12440000	16145000	7368400	9004900	7707800	7348200	9002700	3272800	7384950	5095620	9029300	3881000	2777200	5282978	11025000	9151800	21819000	6268600
P01024	62143000	64958000	506150000	142280000	68457000	50881000	381080000	52165000	14974000	70534000	36643000	64624000	60099000	49782000	25111000	49664000	70625000	100840000	85831000	43062000	72849000	29921000	68433000	177630000	122590000	342620000	106550000
P63241	6432200	10564000	6478900	25143000	7177900	20888000	7674300	83227000	14937890	16065000	7405900	9939700	8448000	14504600	19414000	14214000	33608000	6906700	10971000	11732000	10247000	10143000	8456600	13034000	20335000	23160000	13201870
Q99985	7895800	7870300	26873000	95388000	34173000	25082000	14475000	28532000	14680000	25088933	9601600	29649000	52052000	30935000	104230000	13291714	24066000	16655000	4947600	17269000	9647500	12895000	18122000	12358000	11965000	12500000	47934000
P48745	31992000	10617000	24877000	39473000	6714800	36002000	52530000	44468000	14641000	17788333	14167000	20432000	86364000	42158000	5967800	9674700	39755000	15118000	41272000	6387100	22427000	29323000	14728000	24781000	8066800	13694000	23202000
P00751	36932000	36125000	127680000	33801000	143630000	26088000	259000000	60335000	14550000	25148000	25317000	72356000	48416000	24468000	16313000	23426000	25933000	30972000	49932000	21875000	30080000	20412000	31246000	65512000	196870000	261830000	41067000
Q86X29	7143900	15944000	8880400	19398000	20687000	88412000	10813000	13626000	14495290	45380000	11210000	16553000	17102000	7493000	7110000	4067700	11847000	11904000	17553000	12660000	12711760	10149580	13122000	12777000	10143433	12388000	14334000
P49368	11337800	11577138	7957800	34742000	32427000	13744000	27153000	31722000	14434000	9715000	13826000	27090000	19850000	11665000	11182000	6937700	32798000	12734000	7836600	5002000	18003000	11724000	8168100	13596000	15425000	23916000	11517688
P28799	22466000	12846900	16821000	76790000	29368000	11503000	14257000	13202000	14371000	18557562	3465800	35779000	10155000	2622300	3578000	3652800	2504400	7174200	3498900	7073200	6751400	3537700	6250900	6596400	6875600	16068000	11474000
P48643	10400044	6641200	13077225	19117000	5046300	8223400	50003000	23054000	14324000	12220000	11495000	13835000	14393733	30695000	6213800	14504000	17304000	12608400	8282930	6697000	22037000	7167200	10659000	9531700	8765100	53676000	7980400
P62873	10569000	12530000	17301662	47684000	11319000	30577000	15474000	22152000	14263000	45971000	4530900	7938300	7650800	53066000	23174000	42358000	23363000	20255000	16775000	11042890	9633230	12420000	8981689	78627000	22158000	21961000	11189000
P49721	8747600	12464000	14818000	10758000	10725000	18054000	23328000	18190000	14123000	10202000	6552800	21767000	10924000	9722200	10094000	23609000	15927000	12343000	6387100	6236700	6953300	8998400	4568400	38501000	3578700	28819000	12192000
Q9UL46	16580000	8088600	9376200	36112000	22964000	41945000	12128000	10712000	14007000	7002400	4352200	10738000	20300000	20855000	20089000	15976829	7747167	4939100	6155200	3924800	3527600	4346800	4940900	21701000	14727000	2879000	22331000
P98095	40009875	25567333	7808600	68668000	164220000	27251000	256810000	259250000	13676000	61324000	44000000	19110000	23439000	7372500	3448600	16047000	15602000	20041000	11212544	16069000	14642000	12193000	9056900	11520000	44138000	60253000	25685000
P51148	9182671	8791120	9438900	19617000	17913000	7717200	16437000	30664000	13661000	5322700	8844700	15569000	10652000	12232000	7478862	10547350	18051014	10321000	8928000	9538500	14408000	13103000	13345000	11306370	9113400	24555000	14063000
O14672	4496900	7699400	10127000	33414000	17161000	12998000	21294000	11413000	13615000	18201000	14513000	27483000	23204000	198120	6841700	4660400	6694100	4283400	8115260	23135000	9662300	11233000	7376500	14389000	12139457	68879000	10044000
Q92743	11669000	11559000	10830000	50422000	15434000	98310000	39015000	21594000	13439000	19257000	6367100	14745000	4037700	5246800	6674817	3075400	7338700	1895500	14868000	4099200	5517400	14654000	9896500	13304000	10540000	47793000	2870600
Q9BVM2	3491700	5056200	12355075	17622000	17786000	8996700	43037000	28480000	13211000	5654900	9377700	13615000	4710900	5597771	3749500	6440120	9067200	10371000	3831000	1935300	6757000	3210900	1677200	5104086	8216800	23428000	1552800
Q9UHC6	3052200	7307300	3671100	122700000	3502900	23562000	7342200	9866200	13055000	7662700	9179400	4598800	5050200	8900500	6220971	6184700	1144000	5459700	14933000	23108000	3173000	5906800	8275800	18308357	3029100	67352000	3025000
O75369	10724000	9303900	9006400	28587000	8311900	10511000	16809000	11751000	13009000	9369400	4586900	12655310	10758000	10145000	6490700	3385800	6941800	10117000	12851000	15575000	9016700	7947900	2278700	4424700	7156900	14579000	6529100
P08195	14958150	12818122	9601100	40627000	30528000	45511000	37139000	18072000	12621000	13766000	5469400	19881000	9538500	15721067	26852000	35371000	6518550	8120100	5471900	5268500	4376100	8368467	9019989	10126267	8855100	13877000	12607000
Q00610	6614400	11254000	9347500	10431000	9994600	9137300	31589000	18534000	12552000	6619300	5548700	16910000	6673600	17194000	9576300	8393700	25771000	16697000	10261000	8495800	23903000	18028000	7393100	3047700	13258000	25355000	5915800
Q06323	9749800	13336000	21017000	25028000	17977000	11655000	28100000	17465000	12477000	16752000	9093400	24503000	15487000	12407643	19678000	8787500	24402000	10452000	8764500	7246900	8760900	10091000	9145200	24351000	27098000	21441000	24035000
Q9GZN4	12431000	6370600	6022500	29304000	17635000	17476000	10345000	13590000	12428011	23412000	7426100	12964000	12066850	14641000	10298000	11430833	9870300	6435712	5298400	6470700	7336900	2256800	5111700	14658000	12362575	4151600	17949000
O00462	16471000	8811000	17475000	31189000	20262000	11025000	20848000	30608000	12424000	18281000	17106000	12546000	24452000	31082000	9746500	12116000	7722600	14427000	14120000	16353000	32127000	10715000	21389000	31312000	9357800	34172000	19946000
P53634	4517500	23647000	13795000	43167000	13856000	4717900	3709600	46005000	12401000	19603860	5842400	5848300	3247000	12041450	3285300	8280480	14254000	11019000	16026000	11258000	7543100	6580711	8659583	8042100	10021033	7639300	14456000
P28838	8570400	8378800	6048600	13033000	29200000	42123000	27372000	13860000	12323000	9692100	5784600	14397000	6913700	14425000	8702100	11787000	34345000	8899400	6983300	14068000	14024000	9862800	8387800	6158700	8331200	23048000	11800000
Q99832	11391278	12432000	12050000	15190000	10721000	10283000	33545000	16602000	12229000	10694000	10682000	17081000	11797000	30515000	23402000	24112000	18921000	27638000	11269000	5606000	20866000	16705000	16458000	22651000	19211000	24431000	13458622
P68402	11934000	12559000	7194400	10381000	16895000	25448000	6270400	54736000	12197000	9421500	3092700	6309300	7349800	4974300	7027400	5181900	7668700	9554000	6329300	11770000	11202000	8545900	11724000	11325000	7069200	14433000	6718400
P62826	5798100	10562000	8279400	12346000	4318600	13387000	25005000	41174000	11923000	15744000	10946000	20869000	5799100	71423000	13391000	21688000	43822000	4800400	11511000	11253820	10695000	9372388	9552044	50106000	14750000	13541000	10107000
P29218	10990000	7976000	31167000	58440000	83338000	50755000	293480000	149350000	11716000	20126000	18866000	64542000	12664000	73317000	3461400	41612000	123340000	28971000	16251000	6796300	22181000	12043000	8660800	37077000	15945000	100880000	2751700
Q14894	8167300	14481000	6297500	16880000	33789000	18773000	11454000	3157800	11692000	13163000	7200300	5019500	12130000	22812000	13143000	8061400	15824688	9002800	10723000	26527000	19422000	18766000	29835000	15196025	6618000	20084000	14678000
P26038	17345000	31096000	13711567	13657000	24908656	78907000	16784000	35234000	11650000	17594000	12510000	15670000	9463200	22930000	19545000	13376000	27826710	25135480	38083000	18236000	39057000	48754000	52008000	13360000	46335000	60797000	15276000
Q15257	3112100	9445700	2711500	14197000	28052000	5448900	17689000	9550500	11465467	14438000	9377500	19507000	14589000	23147000	21017000	16199000	42475000	7223400	5281500	9594850	11673580	12868000	2836700	11131000	4677100	18192000	7349300
P08133	9920500	11023000	12724000	10759000	11471000	22464000	13869000	13603000	11297000	15165000	4872100	11569000	19153000	19384000	13496000	39484000	8700100	9772700	9475800	11185000	9084300	6321500	6589700	13892100	28489000	11081000	8494400
P00352	58846000	37702000	40723300	106600000	71098000	60387000	189740000	118670000	11178000	71110000	23166000	37642000	35774000	85258000	15680000	19609000	89900000	27881625	49831000	26037244	10579000	34879000	36520000	169850000	44717000	63661000	51425000
Q96DA0	32772000	34453000	37526000	29745000	15973000	178480000	71794000	68363000	11122000	14563000	8927300	102520000	8874700	79692000	6902000	93699000	16297000	123820000	52066000	54818000	130310000	73207000	62993000	59802150	22751000	8540800	48590000
P50991	9110800	10346000	9989300	6857200	14618000	6046800	30007000	20997000	10980000	9143400	9052300	17910000	16718122	15944000	5549200	10259000	12666000	11596000	4117900	5940200	16219000	13883000	11746000	10801000	11157000	21535000	4752600
P30085	7765200	6867900	6174100	24851000	11034000	12694000	12722000	26328000	10945000	6597200	7063700	17043000	9397800	5401200	7438400	5457800	4019100	7064400	12297000	2154500	13997000	13266000	18881000	6677000	6324900	9693400	6972300
P45974	4768662	6455000	5159600	11763000	5702200	5555600	8380100	15747000	10900000	6398300	4774800	7046800	9196000	14147000	8797700	5652700	7992700	8442300	7808733	9578380	12814000	7581689	7568740	3095400	11047000	7298000	5369000
P16278	14966000	20441000	21108000	64386000	120900000	48079000	82135000	73399000	10848000	17117000	24669000	63500000	22471000	20095000	10865000	34722000	54896000	15436000	14036000	7851400	18642000	11026000	8969500	66254000	20940000	68612000	17185000
P23381	8062800	4692200	7139900	12711000	15976000	8593900	18892000	30555000	10507000	10979886	10157000	12069000	9907100	8400200	7163100	2295225	21268000	4043500	5011400	2605400	3917000	5655250	5709400	2836200	11609000	8747900	5670500
Q075Z2	10004000	2062100	11301000	45827000	26653000	46467000	62357000	44353000	10450000	10948000	13617000	11727000	6423500	52572000	3601400	21481000	41707900	9714156	3155100	2447500	9185210	23110000	6330900	70488000	3696600	44682000	7904600
Q9NS15	15823000	13558000	13724000	33337000	20271000	18909000	17838000	12270000	10410000	21760000	12357000	32393000	19234000	3262000	5428100	10554000	12947000	6336500	7335100	9417300	7945700	2490300	1456000	11218000	14963000	22237000	18033000
Q9H2U9	12352000	3536400	14602300	11709000	7561700	31854000	87390000	59493000	10362000	9001100	9351800	9716600	3096700	5163300	6266600	11417000	134300000	7091767	15088000	8994150	12761000	12796000	926110	6795900	9183662	45572000	5884000
Q14204	8413400	6995000	105766425	9667300	6672600	5749600	11538000	9157300	10154000	7195500	13913000	11077000	8145256	13905000	8400100	5644100	21399000	24771000	12143270	9003050	9534744	3156500	4989500	12210312	22866000	11215000	9753200
P49588	2568500	5055971	5165300	9427900	3899300	5705200	2767100	4309000	9862900	2332900	2352400	10568000	6168500	5240420	7882840	4980000	2510800	3741400	4116293	2489100	3962100	3589200	2079700	4048100	5631200	3327900	3519200
P21810	12775640	10413000	20807000	19969000	35939000	96331000	31553000	18646000	9674800	21283033	11786000	11211000	3812300	12096000	22492000	20817000	21916000	8015470	20122000	8100000	8722300	7987500	7609100	30072000	7705600	54148000	24117000
P50990	10973044	4493500	14470000	23960000	11874000	15676000	80029000	22908000	9609200	14293400	9958200	48131000	17695767	29025000	10114000	15732000	27567000	8411300	7072800	5887500	9483800	16594000	13414000	16036000	12750000	32374000	4124200
Q6BCY4	27784100	6131300	23006000	134340000	26309000	63133000	263450000	48645000	9582800	7704400	6505500	56140000	25408414	32234000	6037000	41450000	34207000	5649400	7557040	1860700	4621600	7760598	1803100	15144000	12132300	103420000	12946522
P17931	15525000	9263300	20174000	41354000	13903000	22228000	20298000	15071000	9470200	8313100	5100800	17312000	17603000	14872000	8836757	6527500	6233000	8039400	15208000	15472000	13013000	10660000	10341000	4064700	9085900	14134000	8743100
P40227	6515033	4953400	4711300	4784800	4196500	4461200	25815000	14053000	9376900	2931300	4349800	5106400	6120300	4455862	9849200	6978000	9213700	6948400	3075400	6008470	5080600	5450900	3510400	5054000	9105600	22965000	4740200
P05156	8022700	6535100	26169000	14752000	10520000	7820600	19396000	16371000	9343440	8317400	9739200	17200000	13756989	19558000	4343700	3461700	19718000	5691500	9582400	8678000	12763000	6845500	5660500	8523600	2483900	27398000	9529700
Q6NT32	84242000	29027000	5819400	133630000	138470000	72294000	352720000	138420000	9121500	45988000	41916000	11787000	4866900	24322000	38460000	29507000	79398000	8579200	4104100	14170000	19627000	52712000	13088000	15946000	46015000	73718000	32777000
P21217	40355000	27497000	13958000	48665000	52599000	33373000	18942000	24989000	9026000	45191000	9572800	25216000	29092000	20124429	14552000	19976000	10709000	7955600	29655000	13625780	16469000	5392000	13744069	25190000	7525200	15739000	19721000
P40926	4913200	16774000	13470000	22649000	62278000	8194300	46321000	60966000	8977200	14603000	19806000	12140000	5793800	14953000	8990400	46990000	214930000	14305000	13306410	15782240	23093422	17497656	20711840	34764000	3186000	79796000	4423600
Q9BY14	29435570	24595000	32922750	75631000	103210000	14519000	152460000	193290000	8826800	39137000	27528000	73067000	30931333	25462000	5359800	25614000	34173000	25373000	3244800	4266500	13819000	22543700	36665000	45871000	37041000	83975000	17830000
Q9H336	11292000	15742000	14401000	62315000	64885000	48101000	28726000	49270000	8674800	38051000	7219900	16313000	15639857	13656000	4644300	7950000	39948000	13005000	12856000	17842000	6581600	16353000	5881800	16687000	5661500	89554000	46115000
Q16270	3620300	6158800	8759800	16197000	5469100	6855800	11349000	13747000	8628100	15074000	7593600	7886300	12673000	2538500	1447100	5109600	2017700	2872600	4302100	1904100	3748000	1797400	3063500	2701809	4231200	15535000	6133200
P06396	21561000	17578000	56553000	66689000	43351000	39638000	66119000	35948000	8334500	10032000	11896000	27765000	32607000	4384000	21974000	35862000	21989000	11247000	14910000	12185000	13312000	8225400	5324100	16879000	117120000	41362000	16665000
Q7L266	29699571	29306614	11030000	60489000	6896300	85700000	234840000	80849000	8152300	2159200	9643200	22432000	1720000	14572000	521110	17930000	124920000	16400000	1638800	12459756	6098400	8978300	20317000	24960000	12294000	72388000	11965638
P31946	10635000	9009300	12222000	18677000	14282000	10746000	13666000	23312000	8115300	13689000	22347000	28253000	35286000	9432525	3565800	11917000	8003100	10084000	8349900	8888400	12988000	17996000	13458000	7266000	21188000	18328000	11305000
Q9Y5P6	13055000	8579100	4570500	25152000	13792270	17331000	3911500	7953500	8088200	27909300	3688200	14159000	13113000	16446017	12890000	5781550	8025880	12867000	7006100	8597500	9257200	11760000	11202000	20605000	8241400	8489600	5076400
O00764	3860000	7352900	7667700	8298400	5848800	6561300	7368300	4152600	7963000	3600700	4047100	5197800	9016000	13717000	21235000	4576100	3110900	4029644	3331600	4947600	6309100	3382400	3729800	4522466	7501400	7601800	5765878
O14786	33404000	16591000	21062000	30229000	58119000	33072000	35354000	10324000	7912400	32124000	9546000	25318000	11084000	4983850	5927600	10239000	9942000	5288500	7316840	8671200	8649200	3088600	213320	43196000	5146000	14631000	17165000
P22748	11799000	6999300	14056000	72331000	5420400	48965000	87452000	38982000	7874000	5232900	24830000	8284200	7305700	7150500	6330800	16065000	18798000	5688000	14285000	7328200	16765000	10329000	4420400	34130000	8784800	89153000	9256000
P13797	2777400	6351900	10552000	29762000	3714500	26441000	69437000	9254100	7561800	16691000	6228300	10222000	8433778	2628400	4594850	5799475	6964200	5520700	7128800	2091400	8891500	6497389	9073600	2555100	8815300	30004000	7363900
Q13275	10297000	9717600	9137900	27437000	15062000	12921000	12366000	18867000	7559900	23356000	7531700	12961000	8664000	3864800	10951043	10060012	12826643	7478600	16814000	8303200	11213000	5658700	8597991	17671656	10161000	20519000	19219000
P29401	7387100	8125600	13511000	10489000	9923500	8822900	173910000	17251000	7467800	20718533	3225600	8216300	16639000	19684000	7883900	3796500	7190300	10093000	11787000	9624800	8663200	13286000	22499000	22102000	64099000	19861000	7312600
P35527	61757000	39207000	19298000	139640000	34448000	8243000	4626400	11275000	7164900	37309962	143710000	35023000	246980000	19241000	12788000	11201000	332250000	18983000	51931000	47716000	24856000	32621000	86989000	459740	14510000	31181000	18737488
P00450	28429000	20995000	218660000	39215000	28809000	18488000	84195000	32158000	6888400	38278000	15893000	43032000	27201000	66903000	36396000	132320000	38771000	85328000	24631000	14594000	21747000	16139000	29837000	122410000	62469000	113140000	39078000
B9A064	11583150	3188500	150680000	48738000	52171000	7519200	84552000	9949100	6833200	15271810	6449700	8878700	14426000	23006000	12079000	13665000	11513000	15907000	69862000	12458000	5576800	8921100	1037500	60994000	103040000	32279000	35487000
Q7Z4H3	14472440	5299300	4001400	27141000	20410000	10636000	66670000	67894000	6752100	4289100	6001800	7996900	5705167	8974000	7977683	1518100	10426000	5128100	2789800	8697100	4035700	3080500	7431433	23529000	14154000	49640000	7191934
P47895	7127200	8591900	4609600	17926000	17884000	6589600	12984000	24473000	6487600	26076386	4882700	13945000	11170000	10955200	11879925	14700600	17453167	9160200	4904400	13775000	5299100	8175300	6134900	8714071	10396000	15077000	9133000
Q9BTY2	16343000	14673000	11945000	66729000	9830200	36718000	15070000	30627000	6478400	34333000	6942500	21991000	10905000	10653000	1432500	6055500	3585400	32096000	28677000	10522000	16330000	4369800	7295600	9981400	9896433	15854000	8502200
P05060	8038500	6790000	17596000	36454000	26193000	18727000	15014000	38548000	6336400	20623000	11104000	89353000	14425000	2749600	5939100	8894800	1056800	9626400	9738800	6621600	5690900	1833300	1501000	24830000	9155400	23930000	3116500
Q9H1M3	10078000	23740886	67085000	29752000	9627600	79652000	260940000	22806000	6261500	24574700	17661000	37526556	17686729	19479000	14487000	17328000	33390000	6007500	10445000	7292600	11509000	56527000	12998000	25671000	16331275	177090000	17412171
P12109	9740200	17624000	13119000	9246600	14515000	7284300	12946000	22916000	6201500	7922029	6374700	20412000	13219200	2946400	2957300	6185312	2624300	13011000	8322700	10916000	7710100	6080000	10131911	7702100	4036300	11113000	15992000
P02652	9642400	4224400	404760000	6007900	5380100	3982100	9725600	2797200	6080900	3571000	9368340	18504000	8552500	10838000	798340	15747000	1818200	7243300	11608000	16869000	12993000	5573700	13043000	141210000	13432000	7008900	9276000
P26641	5924800	10744000	17017000	19807000	25733000	7975700	79782000	39109000	6015000	11530400	3112500	13093000	17766314	27283000	6683400	27699000	25140000	37111000	8993200	3057500	16628000	1490000	3220200	7196400	14621000	53982000	3455500
P08236	6988300	14350000	9204700	26131000	8687200	5225600	11262000	11444000	6001300	13327000	5032500	9355700	6144200	4897500	6702800	5601167	6396625	7547900	8551200	6951100	4280300	4239200	5270575	3475337	8680400	9605200	6693300
P15907	8226100	4523500	5148500	37573000	4824400	16527000	6590600	15465000	5737500	14778000	8196400	34661000	5698900	10106000	8395500	3662600	1970700	6302300	5903400	13685000	15775000	4057700	3203400	1273600	4173000	8227800	6554600
P46783	4837100	8145500	6713400	3824700	6795800	5056440	12529000	5367100	5272100	3322900	2558900	12454000	8718989	1968223	4132133	4418500	4376043	5829100	780240	3039200	3718300	7317400	2439800	2846900	4613300	10403000	4687800
Q9NRX4	13678189	5532200	9308840	41206000	17491000	15475000	16763000	15285000	5179300	14525000	16677000	20360900	21334000	12375000	8483000	12424000	14655022	9212700	6919300	15970000	9584300	23946000	10478000	9045000	17355000	14489000	13024000
P02511	8020700	4475500	9601100	34167000	12473000	8743700	10555000	14850000	5010200	10227000	2708800	8752490	5948200	2625600	4542250	1876300	3958900	2121500	5093500	2698400	4010500	5646400	3091600	2858377	2116500	10317000	2943800
Q9NZ53	5357600	4158900	87468700	6439600	15602000	16566000	9917900	3476900	4726500	11499000	3384500	4388500	4580100	965170	4542250	5644475	3958900	2697700	2649100	4368600	3394400	3654800	2785700	2601900	4099300	12264000	5942500
Q92820	19323100	14017075	9213000	52895000	14735000	20313000	137890000	48744000	4657400	4859800	10271000	6075700	6321288	13562000	6240714	6719400	11720000	2808200	5349400	3949900	4679900	7477744	7423550	24728000	413737340	39970000	385170
P25788	5548222	12245000	10131000	13842000	8822000	7840800	16255000	8899300	4574900	7584100	21155000	23895000	11721000	6254500	2376800	4299100	14400100	8152400	6204800	6611100	10110000	8622900	14809000	26019100	9122133	19051700	11169600
Q96PD5	4369188	8015962	15096000	4695800	2366800	1612300	4221200	3751600	4376300	6162500	1784100	5846700	6097438	7245674	2454900	24928000	4781783	13468000	5457374	3140500	3075400	1132900	6151400	6712271	7255400	5674200	4161100
P02748	9544400	8051100	19055000	29844000	4936700	14648000	20238000	15511090	4349300	7226400	5926800	7969100	10235000	46283000	7943033	6729600	4739083	12719000	1620300	6065400	4941000	5883900	6333500	5479009	7002322	5967300	5420422
Q6UW15	99681000	12955000	26447000	117640000	36521000	14686000	46865000	25610000	4247300	53763000	37739000	24327000	9786400	38471000	41959000	12835000	15338000	9965600	25667000	5088900	17486210	46238000	6455200	57900000	11553000	35263000	30968000
Q9Y376	4439500	3828900	4152300	3943500	2084100	2968400	3284400	6586800	4204700	11883000	4588100	8592400	5855638	4970674	9489225	10612000	6181600	2639100	4629427	2214300	3678800	2810500	2418900	940960	5101700	8658400	2083000
P68871	1167400	771210	859580000	4366100	6602978	416350	365670	670030	4126100	5438189	78284000	6835000	62201000	25328250	10227450	1422300	31024310	6794200	12155000	3113600	1704500	961610	196570	583540	10572000	51852000	14005800
P61604	6760800	4964900	34760000	45290000	35124000	24927000	93034000	79600000	4007200	18426400	21321000	14423000	10473100	15635000	2749500	4048000	46963000	11502000	6407200	4939600	7630200	7130100	6030700	19656000	8093800	58274000	17011188
O43493	4028300	7425788	4598700	14206000	4412100	4515100	7110700	4266300	3812000	5243457	7009200	8067062	13101000	8283598	7619300	3441900	3107800	2769800	2438000	3277700	3406000	4834500	7005300	2459800	5896762	5105200	5988150
Q9HAT0	18236957	65589000	32452380	18275000	5825500	7710200	117680000	7290400	3749400	10890000	4150400	6238600	7117000	14641000	3316000	3843800	1363000	23727000	14808810	11012222	10202678	1786800	3602200	60914000	23639489	70140000	11441322
P01619	7298700	7967900	64044000	25403660	30221000	8364700	36771000	7709300	3543000	11163533	8850410	31643044	1451900	18516000	10735000	8759471	10109000	10919000	11301000	8119500	8546560	8689300	10912000	12240414	16500000	39507000	9938800
P31025	28482000	3843400	134988150	41315000	47988000	41781760	416890000	5010300	3290300	78709000	24339040	54732000	167400000	26708500	7693400	108020000	907930	41189000	18191250	44608000	104670000	2395300	24007000	11036000	21062883	4399400	101560000
P01591	25279000	8783500	38884000	5529000	18005000	11910000	80263000	10666000	3100700	8827286	13693000	22665000	20813000	24476000	6483200	4081200	10326000	5719900	15121000	21941000	6167100	6350400	17315000	50715000	42789000	51484000	6724700
O00292	15159000	8696500	18354000	16198000	9882100	42075000	22137000	25919000	3092200	30530000	7778700	3808300	3533600	7328223	12943000	29077000	67209000	5323800	7892300	3309800	5556500	6808300	12361000	18234000	1770900	14256000	6008600
Q08431	15317000	13283000	18255000	32458000	19859570	24936000	46838000	25638267	2783200	10107000	13637000	11605000	14115850	34003000	9342500	10504383	9234075	14975000	22273000	10689000	16085000	19389000	10070000	22358000	12574320	17534000	10718811
Q96GW7	38042000	4005300	12153000	19801000	11607000	16481000	30969000	22983000	2710800	7159400	23660000	6115300	15264088	12217933	5778951	16623257	23066000	5734700	12083000	2992200	10210000	8566900	2578900	4467500	4612900	86205000	2058400
P00492	22353417	14516050	18021000	26142000	10915000	54882000	241720000	43532000	2203900	13829000	12144000	32036000	15268830	11520000	7491014	4105300	32882000	12141000	14005000	2446000	1483300	16517000	9259800	13177000	10800000	27214000	4983600
P04217	3047400	22201628	120970000	62202000	50989000	6912700	127340000	45630000	1814700	16505000	12003000	30919000	13661000	39985000	3608500	151430000	55402000	65032000	36233000	15589000	27614000	11135190	11606000	130480000	11576000	18788000	17224000
P01023	14965514	929750	133730000	63402000	23187000	23617000	91993000	25883000	1196200	4877700	5278100	11917000	429810	26828000	8076700	54890000	83766000	57539000	8717600	2623800	4502100	2175900	3152600	26199000	12736000	43728000	1564000
P80188	2118900	40833270	21544000	3179200	19919000	2223900	1028600000	918210	410850	29534444	333720	4212300	3737800	1228400	3154500	11148686	39611000	2039600	1818100	1070000	11565867	10280486	12267000	5133100	358390000	73908000	3147200

## Sheet: Normalised_abundances
	C12	C13	C15	C10	C11	C7	C8	C9	C5	C6	SCT006	SCT0010	SCT009	SCT002	SCT003	SCT001	SCT004	SCT0011	SCT0012	SCT0013	SCT0014	SCT0015	SCT0016	SCT005	SCT0018	SCT0019	SCT0020
Label	Control	Control	Control	Control	Control	Control	Control	Control	Control	Control	COVID	COVID	COVID	COVID	COVID	COVID	COVID	COVID	COVID	COVID	COVID	COVID	COVID	COVID	COVID	COVID	COVID
Q96PD5	-0.836503	-0.560608	-0.313032	-1.219	-1.36203	-1.45969	-1.27538	-1.2123	-0.942884	-0.77602	-1.18208	-0.932961	-0.767642	-0.693294	-0.979218	-0.140918	-0.93944	-0.305649	-0.65986	-0.938606	-0.984517	-1.26462	-0.52006	-0.828163	-0.605746	-1.04997	-0.829389
P68036	-0.438284	-0.277579	-0.591608	-0.62656	-0.445962	0.0164157	-0.250023	-0.449682	0.0464259	-0.209645	-0.632966	-0.249577	-0.438618	0.14089	-0.126145	0.0264215	-0.515232	-0.519833	-0.303247	-0.293623	-0.495873	-0.36126	-0.377917	-0.489729	-0.331307	-0.472628	-0.416705
Q08431	-0.29173	-0.341268	-0.230512	-0.379395	-0.438227	-0.270318	-0.230227	-0.377636	-1.13944	-0.561155	-0.298779	-0.635227	-0.403083	-0.021856	-0.39879	-0.516234	-0.653637	-0.259585	-0.0490655	-0.406668	-0.265999	-0.0312589	-0.306004	-0.3056	-0.366923	-0.559992	-0.418451
O43493	-0.871781	-0.593821	-0.829258	-0.738245	-1.09155	-1.01248	-1.04891	-1.15647	-1.00284	-0.846159	-0.587829	-0.793157	-0.435485	-0.635154	-0.487338	-1.00081	-1.12658	-0.992502	-1.00981	-0.920035	-0.940174	-0.634463	-0.463607	-1.26413	-0.695794	-1.09586	-0.671305
Q92820	-0.190827	-0.317907	-0.527493	-0.167302	-0.567847	-0.35937	0.238707	-0.0986031	-0.915847	-0.879158	-0.421885	-0.916275	-0.751984	-0.421049	-0.574018	-0.710274	-0.550103	-0.986523	-0.668539	-0.839019	-0.802183	-0.445044	-0.438422	-0.261844	1.15032	-0.202139	-1.86287
Q02487	-0.387194	-0.416676	-0.477331	-0.512355	-0.293498	-0.250404	-0.720012	-0.294938	1.4097e-08	-0.085957	-0.427246	-0.233494	-0.00116908	-0.355465	-0.252778	-0.110035	-0.347979	-0.243333	-0.313127	-0.355195	-0.409387	-0.258683	0.1823	-0.741049	-0.117328	-0.360776	-0.286263
Q9HAT0	-0.215952	0.352267	0.0193528	-0.62886	-0.970863	-0.780078	0.169877	-0.923772	-1.01003	-0.528749	-0.815407	-0.904784	-0.700493	-0.387802	-0.848638	-0.952843	-1.48452	-0.0597091	-0.226324	-0.39373	-0.463706	-1.06674	-0.752465	0.129684	-0.0927698	0.0420923	-0.390122
P01619	-0.613658	-0.56322	0.314585	-0.485821	-0.255888	-0.744694	-0.33532	-0.899508	-1.03462	-0.517975	-0.486534	-0.199594	-1.39084	-0.285826	-0.338451	-0.595127	-0.614322	-0.396769	-0.343727	-0.526076	-0.540628	-0.379829	-0.271129	-0.567236	-0.248924	-0.207199	-0.451264
P24593	0.228178	-0.973369	0.120381	0.504032	0.164503	0.309705	-0.38301	0.466886	0.25104	-0.398755	-0.441519	-0.456308	0.172615	-0.800272	-0.503231	-0.15928	-0.520491	-0.212722	-0.442235	-0.577132	-0.374954	-0.433532	-0.424039	-0.784915	-0.310071	0.0582937	-0.356334
P08195	-0.302026	-0.35674	-0.509573	-0.281902	-0.251499	-0.00902824	-0.330995	-0.529518	-0.482898	-0.426969	-0.695558	-0.401434	-0.57331	-0.356891	0.0597237	0.0110423	-0.804879	-0.52539	-0.658706	-0.713918	-0.831332	-0.396168	-0.353828	-0.649583	-0.519214	-0.661578	-0.347986
P02748	-0.497155	-0.558709	-0.211885	-0.41586	-1.04276	-0.501366	-0.594658	-0.595882	-0.945571	-0.706855	-0.660677	-0.798463	-0.542702	0.112048	-0.469266	-0.709615	-0.943335	-0.330499	-1.18725	-0.652746	-0.778605	-0.549149	-0.50739	-0.91633	-0.621166	-1.02809	-0.714565
P25788	-0.73275	-0.376605	-0.486241	-0.749518	-0.79063	-0.772784	-0.689839	-0.837168	-0.923609	-0.685873	-0.108085	-0.321565	-0.483825	-0.75718	-0.993259	-0.904227	-0.460665	-0.523666	-0.604116	-0.615332	-0.467669	-0.383161	-0.138508	-0.23974	-0.506311	-0.52394	-0.40056
Q07654	-0.0692922	0.326726	0.176893	0.162937	-0.40273	-0.456264	-0.444217	-0.0750038	0.154963	-0.0391354	-0.252512	0.0898775	0.147646	0.0169946	-0.157865	-0.564288	-0.385121	-0.0641959	-0.163416	-0.00673614	6.00095e-05	-0.038688	0.153242	-0.0418783	0.0226361	-0.32401	0.463805
P47895	-0.623985	-0.530475	-0.82823	-0.637234	-0.483732	-0.848285	-0.787417	-0.397837	-0.771907	-0.14953	-0.744837	-0.555454	-0.504737	-0.513753	-0.294439	-0.37027	-0.377156	-0.473047	-0.706258	-0.296514	-0.748217	-0.406311	-0.521226	-0.714811	-0.449541	-0.625558	-0.487984
Q06481	0.439218	0.176777	-1.35809	0.321976	-0.486143	0.604325	-0.140396	0.0618496	0.671184	0.596847	0.329323	0.195324	-0.177529	0.678504	0.624214	0.316537	-0.286188	0.113323	0.198674	0.168596	0.0865285	-1.26512	-0.477305	0.456845	0.0260497	0.253298	0.0372085
Q9H2U9	-0.385167	-0.916002	-0.327472	-0.822197	-0.857577	-0.163981	0.040636	-0.0120584	-0.568548	-0.611481	-0.462602	-0.712358	-1.06189	-0.840445	-0.572221	-0.480053	0.509045	-0.584197	-0.218212	-0.481645	-0.366535	-0.21174	-1.34236	-0.822785	-0.503392	-0.145175	-0.678925
Q9H1M3	-0.47353	-0.0890671	0.334732	-0.417201	-0.752679	0.234052	0.515715	-0.428475	-0.787313	-0.175289	-0.186482	-0.125534	-0.305142	-0.263807	-0.208274	-0.298857	-0.0954143	-0.656258	-0.377936	-0.572723	-0.411382	0.433442	-0.195157	-0.24559	-0.253388	0.444321	-0.207745
Q6BCY4	-0.0331077	-0.677011	-0.130053	0.237488	-0.316093	0.133112	0.519872	-0.0994861	-0.602499	-0.679038	-0.620217	0.0494	-0.147812	-0.045059	-0.588432	0.0799195	-0.0849157	-0.682949	-0.518492	-1.16593	-0.807627	-0.428919	-1.05301	-0.474792	-0.382465	0.210731	-0.336445
P46783	-0.792318	-0.553646	-0.664951	-1.30811	-0.903956	-0.963299	-0.802909	-1.05678	-0.862007	-1.04426	-1.02544	-0.604563	-0.612324	-1.25929	-0.753078	-0.892329	-0.977948	-0.66935	-1.5046	-0.952845	-0.902075	-0.454457	-0.921678	-1.20066	-0.802396	-0.786714	-0.777628
P31025	-0.0223336	-0.879848	0.638402	-0.274609	-0.0550646	-0.0461579	0.719196	-1.08666	-1.06675	0.330247	-0.0471944	0.0383689	0.670966	-0.126724	-0.483135	0.495899	-1.66095	0.179829	-0.136982	0.213807	0.547402	-0.939453	0.0713042	-0.612221	-0.14289	-1.16048	0.558125
Q14204	-0.551932	-0.619776	0.532454	-0.905411	-0.911901	-0.907506	-0.838695	-0.824756	-0.577354	-0.708716	-0.290077	-0.65545	-0.641885	-0.410202	-0.444968	-0.78601	-0.288637	-0.0410084	-0.312508	-0.481216	-0.493111	-0.819608	-0.610976	-0.568306	-0.107218	-0.754074	-0.459451
P45974	-0.798507	-0.654667	-0.779277	-0.820198	-0.980154	-0.922413	-0.977575	-0.589326	-0.546565	-0.759712	-0.754542	-0.85188	-0.589191	-0.402709	-0.424884	-0.785349	-0.716337	-0.508491	-0.504263	-0.454313	-0.364735	-0.439048	-0.43001	-1.16431	-0.423163	-0.940669	-0.718704
P51148	-0.513935	-0.52052	-0.516972	-0.598084	-0.483029	-0.779684	-0.685003	-0.299895	-0.448509	-0.839644	-0.486815	-0.507611	-0.525358	-0.465876	-0.495417	-0.514462	-0.362529	-0.42123	-0.44609	-0.456125	-0.313816	-0.201444	-0.183715	-0.601709	-0.506727	-0.413733	-0.30052
P53634	-0.822005	-0.090788	-0.352172	-0.255565	-0.594559	-0.993395	-1.33149	-0.123719	-0.490535	-0.273435	-0.666906	-0.932842	-1.04131	-0.472694	-0.852677	-0.619549	-0.465094	-0.39281	-0.192019	-0.384144	-0.59487	-0.500541	-0.371537	-0.749663	-0.465495	-0.920819	-0.28855
P68871	-1.40968	-1.57737	1.44239	-1.25062	-0.916456	-2.04751	-2.33707	-1.96031	-0.968451	-0.830322	0.460175	-0.865133	0.241008	-0.149768	-0.359486	-1.38461	-0.127329	-0.602813	-0.312089	-0.942342	-1.24082	-1.33581	-2.01537	-1.88888	-0.442251	-0.0891079	-0.30229
Q7Z4H3	-0.316362	-0.740345	-0.889681	-0.457091	-0.426354	-0.640366	-0.0768953	0.0453071	-0.754552	-0.93341	-0.655216	-0.79695	-0.796521	-0.600387	-0.467376	-1.3563	-0.600913	-0.724995	-0.95127	-0.496231	-0.8665	-0.830192	-0.437961	-0.283429	-0.315529	-0.108042	-0.591752
P48643	-0.459869	-0.642317	-0.375378	-0.609297	-1.03322	-0.752093	-0.20183	-0.423778	-0.427927	-0.478706	-0.372989	-0.558893	-0.394616	-0.0663056	-0.575896	-0.376117	-0.380884	-0.334292	-0.47866	-0.609725	-0.129268	-0.463465	-0.281317	-0.675862	-0.523651	-0.0740933	-0.546573
Q6UXD5	-0.392517	-0.497512	-0.604659	-0.190827	-0.718955	-0.468158	-0.581137	-0.863435	-0.407524	-0.470957	-0.22546	-0.832499	-0.598311	-0.666443	-0.503072	-0.583232	-1.10411	-0.566604	-0.689647	-0.479951	-0.883475	-0.875206	-0.586155	-0.612654	-0.504901	-0.465039	-0.651427
Q9Y5P6	-0.361127	-0.531122	-0.831929	-0.490144	-0.596561	-0.428321	-1.30848	-0.885965	-0.67614	-0.120028	-0.866683	-0.54884	-0.435088	-0.337312	-0.259	-0.77556	-0.714538	-0.325475	-0.551368	-0.501233	-0.50594	-0.248407	-0.259738	-0.34106	-0.550407	-0.874985	-0.743042
P23381	-0.570418	-0.793187	-0.638201	-0.786537	-0.532729	-0.732954	-0.624548	-0.301442	-0.562513	-0.525179	-0.426732	-0.618201	-0.556843	-0.629083	-0.514152	-1.17678	-0.291304	-0.828194	-0.696885	-1.01973	-0.879466	-0.566362	-0.552443	-1.20229	-0.401613	-0.861969	-0.694976
P40926	-0.785539	-0.239927	-0.362526	-0.535668	0.0581374	-0.753632	-0.235048	-0.00143657	-0.630851	-0.401335	-0.136701	-0.615653	-0.789826	-0.378645	-0.415474	0.1344	0.713266	-0.279464	-0.272783	-0.237437	-0.108932	-0.0758345	0.00718503	-0.113903	-0.963161	0.0981077	-0.802822
O43657	-0.0139523	-0.146647	-0.0347236	-0.179239	-0.150276	-0.366267	0.0142098	0.0932538	-0.160042	-0.209044	0.0202027	-0.0678506	-0.0967124	-0.231364	-0.266921	-0.389743	-0.610558	-0.411658	-0.087427	0.110159	0.140544	-0.140211	0.229754	-0.557791	-0.291694	-0.152954	-0.339729
P07741	-0.760558	-0.781787	-0.515851	-0.702126	-0.731274	-0.624884	-1.06072	-1.00204	-0.355489	-1.3253	-0.743721	-0.870896	-1.01559	-0.819298	-0.392022	-0.782635	-1.21036	-0.709081	-0.612391	-0.708324	-0.856312	-0.413326	-0.381874	-1.23666	-0.745488	-0.85287	-0.877914
Q9GZN4	-0.382398	-0.660383	-0.712117	-0.42379	-0.489822	-0.424702	-0.886094	-0.653304	-0.48959	-0.196338	-0.562737	-0.587133	-0.471196	-0.387802	-0.3565	-0.479527	-0.6247	-0.626355	-0.672699	-0.624654	-0.606907	-0.96532	-0.600468	-0.488958	-0.374299	-1.18565	-0.194558
Q16769	0.0790968	-0.278739	-0.403899	-0.469607	-0.909299	-0.940351	-0.521411	-0.721804	-0.122869	0.353887	-0.407458	-0.810514	-0.578764	-0.520553	-0.989729	-0.521275	-0.338748	-0.321399	-0.533444	-0.482808	-0.132829	-0.749381	-0.517196	0.160392	-0.386503	0.140624	-0.385265
Q9Y287	0.0314236	0.0151408	-0.74331	-0.633879	-0.905858	-0.40889	-0.550448	-0.128494	0.0250153	-0.0998145	-0.514116	-0.517401	-0.504309	-0.455457	-0.305213	0.168993	-0.304418	-0.0298105	-0.616923	-0.373437	-0.291635	-0.274461	-0.60969	-0.686615	-0.0447217	-0.169517	-0.214359
O14494	-0.205457	-0.361102	-0.272938	-0.856569	-0.625841	-0.639061	-0.841982	-0.271884	-0.186104	-0.270012	-0.207207	-0.513849	-0.380133	-0.339068	0.11671	0.269937	-0.0607782	-0.370943	-0.409953	-0.571177	-0.286623	-0.296716	-0.111615	-0.666521	-0.647153	-0.250063	-0.316402
P80188	-1.15079	0.14645	-0.158567	-1.38839	-0.43693	-1.32002	1.11142	-1.82352	-1.97019	-0.0954482	-1.91002	-1.07535	-0.980173	-1.46402	-0.870322	-0.490381	-0.0212149	-1.1254	-1.13722	-1.40621	-0.409242	-0.306801	-0.220295	-0.944652	1.08795	0.064818	-0.950673
P22234	-0.695091	-0.377552	-0.581184	-0.408959	-0.293232	-0.113589	-0.786181	-0.428209	-0.184197	-0.399465	-0.691511	-0.649222	-0.322673	-0.242914	-0.406917	-0.199168	-0.570783	-0.280163	-0.498432	-0.326382	-0.363385	-0.221002	-0.312761	-0.540107	-0.0203058	-0.497105	-0.456911
O95399	-0.141988	0.0263351	0.0187585	-0.0123792	0.0417078	-0.169496	0.0594071	0.258603	-0.338479	0.157408	-0.0493954	0.260912	-0.0578286	-0.107505	0.0648686	1.4097e-08	0.454614	-0.16318	-0.0904799	-0.122306	0.0107956	-0.0892077	-0.0651527	0.18399	-0.0278813	0.351614	-0.44226
P04085	-0.729329	0.0391722	-0.059229	-0.574789	-0.755766	-0.578902	-0.942605	-0.412174	-0.299065	-0.123062	-0.437271	-0.647127	-0.506724	-0.334265	-0.704723	-0.572491	-0.993028	-0.294601	0.055908	-0.0937952	-0.104301	-0.00359994	-0.318739	-0.626174	-0.466794	-0.801361	-0.411012
O76074	0.714687	0.811323	0.254569	1.21835	1.37771	0.87406	0.293883	0.393745	0.800863	1.20953	0.350756	0.645344	1.41607	0.0484649	0.0493406	-0.0788602	-0.00733013	0.804548	0.52668	0.326938	0.1056	0.212831	-0.0802997	0.113366	1.29532	0.408394	1.17071
P28072	-0.33406	-0.00474953	-0.283479	-0.349712	-0.92785	-0.0649544	-0.093988	-0.210217	-0.298795	-0.336328	0.0577938	-0.213938	-0.136432	-0.377687	-0.248997	-0.117169	-0.376321	-0.141302	-0.342269	-0.229373	-0.133705	-0.0806929	0.0466668	-1.06072	-0.589042	-0.308135	-0.335457
Q13275	-0.464193	-0.477005	-0.531047	-0.45238	-0.558314	-0.555848	-0.808596	-0.510821	-0.705475	-0.197379	-0.556605	-0.587234	-0.615071	-0.966245	-0.329797	-0.535006	-0.510918	-0.561131	-0.171173	-0.51636	-0.422698	-0.566098	-0.374637	-0.407755	-0.459471	-0.491717	-0.164867
P13797	-1.03326	-0.66166	-0.468559	-0.417055	-1.16629	-0.244867	-0.0592348	-0.82019	-0.705366	-0.343295	-0.639128	-0.690336	-0.626767	-1.13368	-0.706981	-0.774216	-0.776159	-0.692957	-0.543828	-1.11517	-0.523445	-0.506075	-0.351254	-1.24762	-0.521171	-0.326694	-0.58149
P40227	-0.662987	-0.76966	-0.818752	-1.21085	-1.11331	-1.01769	-0.488953	-0.638755	-0.611932	-1.09871	-0.795028	-0.991756	-0.766017	-0.904441	-0.375852	-0.693874	-0.654596	-0.593067	-0.908942	-0.656841	-0.766505	-0.582346	-0.763677	-0.951396	-0.507099	-0.442807	-0.772801
Q9NRX4	-0.340875	-0.721666	-0.522998	-0.275757	-0.493382	-0.477514	-0.676474	-0.602259	-0.86972	-0.403661	-0.21138	-0.391075	-0.223718	-0.460828	-0.440703	-0.443343	-0.453044	-0.470565	-0.556782	-0.232301	-0.490859	0.0604186	-0.288755	-0.698624	-0.226983	-0.642835	-0.333854
P00492	-0.12756	-0.302716	-0.236115	-0.473378	-0.698173	0.0722853	0.482487	-0.147716	-1.2408	-0.424986	-0.349136	-0.194234	-0.368984	-0.491921	-0.494712	-0.924259	-0.102072	-0.350697	-0.250561	-1.04715	-1.30119	-0.100883	-0.342432	-0.535216	-0.432984	-0.369081	-0.751054
P49588	-1.06722	-0.760759	-0.778798	-0.916301	-1.14521	-0.910873	-1.45879	-1.15214	-0.589987	-1.19788	-1.06198	-0.675879	-0.76261	-0.834006	-0.47257	-0.840375	-1.21921	-0.861917	-0.782337	-1.03956	-0.874494	-0.763816	-0.991032	-1.04778	-0.715807	-1.2817	-0.902153
P62873	-0.45287	-0.366613	-0.253806	-0.212344	-0.682389	-0.18175	-0.711223	-0.441111	-0.429781	0.096707	-0.777313	-0.800144	-0.669083	0.171443	-0.00425196	0.0893304	-0.250502	-0.12842	-0.172182	-0.392523	-0.488648	-0.224693	-0.355676	0.240539	-0.120877	-0.462221	-0.399807
Q9NZ53	-0.747933	-0.845585	0.449959	-1.08186	-0.543017	-0.447927	-0.904405	-1.24533	-0.909451	-0.505117	-0.904002	-1.05755	-0.891914	-1.56875	-0.711982	-0.785981	-1.02145	-1.00396	-0.973745	-0.795263	-0.941656	-0.75595	-0.864099	-1.23974	-0.853697	-0.715241	-0.674629
P08236	-0.632532	-0.307712	-0.527884	-0.473561	-0.797317	-0.949007	-0.849209	-0.727946	-0.805746	-0.441045	-0.731714	-0.728796	-0.764324	-0.863398	-0.542996	-0.789326	-0.813079	-0.557126	-0.464817	-0.593552	-0.840945	-0.69153	-0.587175	-1.11403	-0.527868	-0.821366	-0.622958
Q9BZQ8	-0.815403	-0.518451	0.0133648	-0.546915	-0.586806	-0.34085	-0.859511	-0.465009	-0.0631808	-0.816179	-0.628663	-0.557107	-0.434922	-0.345954	-0.401187	-0.656283	-0.583137	-0.314378	-0.696772	-0.256226	-0.286991	-0.339239	-0.197637	-0.328369	-0.561335	-0.739752	-0.311371
Q9NY33	-0.737189	-0.375472	-0.370614	-0.649669	-0.638142	-0.220794	-0.959741	-0.414622	-0.0974055	-0.339177	-0.63887	-0.551839	-0.747024	-0.620184	-0.195048	-0.536391	-0.711286	-0.597894	-0.472987	-0.462954	-0.699036	-0.409638	-0.313021	-0.804974	-0.227559	-0.557424	-0.137714
P21810	-0.370521	-0.446988	-0.173684	-0.590361	-0.180631	0.316621	-0.401785	-0.515938	-0.59835	-0.237743	-0.362131	-0.650228	-0.971602	-0.470731	-0.0172249	-0.219187	-0.278269	-0.531023	-0.093173	-0.52712	-0.531789	-0.416403	-0.4277	-0.17687	-0.579601	-0.070291	-0.0662748
Q15828	0.137529	-0.972697	-1.38508	0.363638	-0.076823	-0.703163	-0.165522	-0.303059	-0.40001	0.166231	0.123721	0.265513	0.248408	-0.32424	-0.735431	-0.466533	-0.542864	-0.645583	-0.575213	-0.694603	-0.541496	-0.18938	-0.106824	0.00358913	-0.100228	-0.344994	-0.563254
Q9BVM2	-0.933866	-0.760739	-0.400048	-0.644662	-0.486119	-0.713061	-0.266984	-0.331984	-0.463056	-0.813352	-0.461401	-0.565855	-0.879685	-0.805357	-0.795279	-0.728711	-0.661557	-0.419131	-0.813531	-1.14885	-0.642666	-0.812187	-1.08445	-0.947114	-0.551705	-0.434138	-1.25748
Q96GW7	0.103359	-0.861928	-0.40721	-0.59403	-0.671477	-0.450161	-0.409898	-0.425117	-1.15089	-0.7109	-0.0594831	-0.913454	-0.369119	-0.466375	-0.607404	-0.316889	-0.256058	-0.676441	-0.314669	-0.959614	-0.463394	-0.385991	-0.897598	-1.00497	-0.802433	0.131659	-1.13507
P10586	-0.555649	-0.209474	-0.356278	-0.181515	-0.49785	0.133022	-0.223913	-0.388688	-0.0558982	-0.484646	-0.224063	-0.220239	-0.374187	-0.0498821	-0.178026	-0.19398	-0.601955	-0.400564	-0.501477	-0.285525	-0.523118	-0.262645	-0.14502	-0.631945	-0.422967	-0.339518	-0.291988
Q14974	-0.589765	-0.693896	-0.481499	-0.80251	-0.76294	-1.07391	-0.702113	-0.275617	-0.317196	-0.333416	-0.885489	-0.634367	-1.07248	-0.293039	-0.417323	-0.5688	-0.0203058	-0.515671	-0.924511	-1.12457	-0.702784	-0.484646	-0.490056	-0.854611	-0.104793	-0.613485	-0.798815
P11684	0.144231	-1.11149	-0.339269	-1.0649	-0.65872	-0.203685	-0.92243	-0.236443	-0.222472	-0.347515	-0.166209	-0.25868	-0.281088	-0.701984	-0.445831	-0.574113	-0.988835	-0.972014	-0.490525	-0.594477	-1.10043	-1.08531	-0.595854	-0.322594	-0.613781	-0.904085	-0.686137
P22392	-0.36436	-0.286336	-0.248533	-0.412685	-0.329776	-0.181523	-0.495838	-0.464781	-0.180237	-0.290829	-0.0202483	-0.318559	-0.167291	-0.218262	-0.229985	-0.419076	-0.79662	-0.0918389	-0.165324	-0.162465	-0.0949862	-0.0319314	-0.0186651	-0.265406	-0.319226	-0.428502	-0.269535
O00469	-0.676393	-0.611066	-0.721351	-0.535112	-0.650122	-0.665194	-1.21131	-0.637521	-0.240268	-0.335149	-0.429779	-0.533798	-0.438913	-0.851278	-0.993369	-0.36097	-1.2043	-0.321276	-0.364709	-0.858768	-0.780401	-0.491905	-0.489116	-0.366538	-0.687432	-0.683826	-1.05909
P48637	-0.0234175	-0.245609	-0.140097	-0.278697	-0.350649	-0.810935	-0.614324	-0.491177	-0.3249	0.0747839	-0.196784	-0.420959	-0.242734	-0.231068	-0.408711	-0.781349	-0.315326	-0.19246	0.158891	-0.109782	-0.214861	0.171495	-0.0680852	-0.3554	-0.126003	-0.405343	-0.397986
Q9BR76	-0.221945	-0.168667	-0.110039	-0.29467	-0.419388	0.0606487	-0.233345	-0.702198	0.00598014	0.149717	-0.186852	-0.213499	0.0462959	-0.14977	0.0336377	-0.16074	-0.0955429	-0.0752113	0.214614	0.0288542	0.0580871	0.198659	-0.0249189	-0.632233	-0.263484	-0.229692	0.43975
Q9Y376	-0.829569	-0.881489	-0.873604	-1.29483	-1.41727	-1.19462	-1.38436	-0.967849	-0.960256	-0.490851	-0.771864	-0.765757	-0.785215	-0.856957	-0.392022	-0.511808	-0.827929	-1.01349	-0.731317	-1.09037	-0.906713	-0.87003	-0.925415	-1.68143	-0.758692	-0.866435	-1.12991
Q9BY14	-0.00803159	-0.0737172	0.0256024	-0.0120173	0.277525	-0.505208	0.28233	0.499685	-0.638188	0.0268105	0.00627686	0.163849	-0.0623912	-0.147481	-0.640104	-0.129128	-0.0853476	-0.0305801	-0.885655	-0.805533	-0.331943	0.0342109	0.255218	0.00650549	0.102275	0.120277	-0.197447
Q86X29	-0.622968	-0.261967	-0.543461	-0.60296	-0.4205	0.279367	-0.866879	-0.652156	-0.422765	0.0910875	-0.383892	-0.480996	-0.319743	-0.678717	-0.517383	-0.928255	-0.545422	-0.359259	-0.152493	-0.333172	-0.368214	-0.312366	-0.191034	-0.548604	-0.460223	-0.710872	-0.292231
P26038	-0.23773	0.0281405	-0.354807	-0.755361	-0.339847	0.229971	-0.67593	-0.239562	-0.517666	-0.320412	-0.33624	-0.504803	-0.576752	-0.192969	-0.0782173	-0.411279	-0.174569	-0.0346647	0.183887	-0.174676	0.119279	0.369196	0.407036	-0.529226	0.199501	-0.0199913	-0.264588
P34913	0.0163052	-0.0429629	-0.697489	0.301878	-0.328466	-0.411993	-1.00732	-0.452171	0.0675673	-0.444184	-0.540591	-0.287983	-0.0239117	-0.231633	-0.31926	-0.013144	-0.31213	-0.0863161	0.0433877	-0.339043	-0.168145	-0.25316	0.217267	-0.119372	-0.0367202	-0.4509	-0.205783
P02511	-0.572692	-0.813722	-0.509573	-0.35711	-0.640226	-0.725449	-0.877367	-0.614798	-0.884136	-0.556029	-1.00072	-0.75774	-0.778404	-1.13414	-0.711982	-1.2643	-1.02145	-1.10831	-0.689828	-1.0045	-0.869221	-0.567043	-0.81885	-1.19891	-1.14079	-0.790319	-0.979688
P35080	-0.548134	-0.364679	-0.368418	-0.502136	-0.523078	-0.349332	-0.73118	-0.480614	-0.360677	-0.100722	-0.218866	-0.4409	-0.10308	-0.835195	-0.452312	-0.853531	-0.703726	-0.389746	-0.404348	-0.526756	-0.425379	-0.260768	-0.29405	-1.05912	-0.389076	-0.589109	-0.528522
P56851	1.12372	0.232732	-0.0519298	0.437234	0.250637	0.522851	0.760817	0.521293	-0.0314209	0.167474	0.729395	0.800872	0.549917	-0.389645	0.433938	0.0141376	0.524328	0.449356	1.03352	0.668506	0.723839	1.05513	0.811079	-0.332689	0.189057	0.479925	0.532888
Q8N114	0.0995295	-0.58387	0.38932	0.366337	-0.0387761	0.13132	0.0134751	-0.347571	0.370641	0.265542	-0.533546	-0.162519	-0.187152	0.602721	-0.0588146	-0.0322515	0.107965	-0.425664	-0.668831	-0.550997	-0.724604	-0.574662	-0.316264	0.272461	-0.515328	-0.261248	-0.443289
P12109	-0.488336	-0.21846	-0.373993	-0.924734	-0.57438	-0.804756	-0.78869	-0.426385	-0.791494	-0.66694	-0.629038	-0.389987	-0.431585	-1.08408	-0.898357	-0.746243	-1.20001	-0.320641	-0.47658	-0.397542	-0.58536	-0.534911	-0.303342	-0.768423	-0.860424	-0.758042	-0.244695
Q7L266	-0.00415386	0.0024016	-0.449318	-0.109041	-0.89758	0.265836	0.469946	0.12115	-0.672711	-1.23148	-0.449277	-0.349004	-1.31726	-0.389854	-1.6523	-0.284025	0.477601	-0.220108	-1.18231	-0.340096	-0.687204	-0.36562	-0.00117407	-0.257788	-0.376715	0.0557931	-0.370662
O00764	-0.890316	-0.598105	-0.607228	-0.971722	-0.969129	-0.850154	-1.03346	-1.1682	-0.682915	-1.00939	-0.826353	-0.984052	-0.597776	-0.416114	-0.0422007	-0.877109	-1.12614	-0.829685	-0.874191	-0.74121	-0.672452	-0.789589	-0.737348	-0.999656	-0.591265	-0.922956	-0.687732
P11216	-0.657245	-0.413489	-0.529491	-0.738551	-0.519213	-0.565397	-0.679333	-1.14099	-0.322634	-0.705648	-0.928388	-0.747656	-0.681304	-1.34471	-1.00972	-0.725808	-0.793481	-0.377476	-0.41581	-0.515858	-0.304188	-0.416257	-0.337625	-0.617168	-0.32801	-0.746664	-0.613377
P20336	0.052231	-0.186772	-0.114515	-0.216548	-0.736905	-1.01455	-0.327235	-0.0682884	0.190109	-0.0421736	0.0803322	-0.196395	-0.0863968	0.243388	-0.121451	0.00974023	-0.331207	0.229699	0.285923	0.396514	0.452278	0.486985	0.677765	-0.156033	0.125969	-0.0689057	-0.182484
Q8NEB7	-0.452213	-0.491958	-0.161845	0.465519	0.00542703	0.234564	0.670592	0.344549	-0.173417	-0.39985	0.322377	-0.111477	-0.0511071	0.27167	0.0748977	0.0536377	-0.267911	0.035488	-0.193866	-0.497586	-0.271597	-0.754906	-0.400313	0.479049	-1.35353	0.249474	0.10039
Q9H4B8	-0.918087	-0.560081	0.434973	0.207684	0.0876225	-0.00447177	0.901797	0.553583	-0.332962	-0.104504	-0.583041	-0.501903	-0.830048	-0.1914	-0.703484	-0.25444	-0.166233	-0.351987	-0.81232	-0.497389	-0.331158	-0.517583	-0.726163	0.0473203	-0.820936	0.0438102	-0.415979
P61604	-0.646906	-0.768653	0.0491861	-0.234715	-0.190593	-0.270475	0.0678159	0.114389	-0.981149	-0.300336	-0.10469	-0.540817	-0.532714	-0.359275	-0.929998	-0.930364	0.0527252	-0.374178	-0.590176	-0.741913	-0.589884	-0.465719	-0.528666	-0.361538	-0.558255	-0.0383986	-0.217863
Q9UHC6	-0.99229	-0.600807	-0.927097	0.198127	-1.19177	-0.294932	-1.035	-0.792374	-0.468215	-0.681395	-0.470683	-1.03723	-0.849481	-0.603959	-0.575395	-0.746286	-1.56059	-0.697783	-0.222697	-0.0718431	-0.970949	-0.547462	-0.391224	-0.392383	-0.985093	0.0244771	-0.967872
P49368	-0.422375	-0.400963	-0.591101	-0.349862	-0.22529	-0.529031	-0.467008	-0.285164	-0.424605	-0.578334	-0.292801	-0.267063	-0.255029	-0.486488	-0.320733	-0.696389	-0.103183	-0.329987	-0.502716	-0.736461	-0.217075	-0.249739	-0.396913	-0.521621	-0.278183	-0.425185	-0.387233
Q12805	-0.387317	-0.363749	-0.279786	-0.368364	-0.572261	-0.771644	-1.01185	-0.128923	-0.294514	-0.203125	-0.119062	0.095667	0.0539784	-0.805759	-0.442494	-0.583054	-1.07153	-0.263489	1.4097e-08	-0.323168	-0.315356	-0.1909	-0.0525805	-0.680839	-0.316125	-0.348907	-0.415214
Q8NCW5	-0.371803	-0.417679	-0.215593	-0.332573	-0.949842	-0.596922	-0.892949	-0.445743	-0.352293	-0.293448	-0.438648	-0.387526	-0.289651	-0.445282	-0.293925	-0.620138	-0.271466	-0.460307	-0.434006	-0.298917	-0.324126	-0.194734	-0.30351	-0.685915	-0.475386	-0.386501	-0.476614
Q58FF8	-0.709495	-0.276114	-0.592746	-0.10558	-1.08378	-0.106389	-0.573426	-0.144178	-0.264157	-0.406661	-0.416005	-0.413685	-0.247352	-0.548321	-0.652165	-0.660112	-0.285664	-0.425476	-0.258194	-0.440121	-0.410741	-0.243377	-0.28193	-0.842092	-0.844452	-0.421604	-0.508301
Q16777	-0.131452	-0.311451	0.432964	0.107259	0.238908	0.351265	0.424382	0.490328	0.185297	0.405276	0.650649	0.777234	-0.186834	0.09674	0.0878296	0.168988	0.542727	-0.414176	0.138059	-0.462505	0.0888961	-0.215764	-0.361629	0.391033	-0.213361	0.651581	-0.642113
Q14990	-0.521924	0.0116587	0.0583469	-0.299942	0.184787	-0.151072	-0.0215291	-0.21604	0.211325	-0.464511	-0.0692846	0.19602	-0.462391	0.0353736	-0.0873791	-1.09328	0.0626937	0.555702	-0.0985589	-0.894075	0.0628615	-0.403583	-0.122794	0.941575	-0.187586	0.327841	-0.365526
P16070	-0.42715	-0.636717	-0.170959	-0.454284	-0.556703	-0.936321	-0.951981	-0.423917	-0.107146	-0.139119	-0.23314	-0.724762	-0.0642814	-0.142141	-0.237378	0.0514326	0.0644486	-0.226672	-0.463878	0.00211337	-0.12045	-0.342249	0.250562	-0.247438	-0.577745	-0.352148	-0.26167
Q15257	-0.983849	-0.48933	-1.05868	-0.73852	-0.288233	-0.930835	-0.653122	-0.806498	-0.5246	-0.40627	-0.461411	-0.409682	-0.388764	-0.188878	-0.0466822	-0.328117	0.00910271	-0.57621	-0.674087	-0.453567	-0.405216	-0.209303	-0.85622	-0.608498	-0.796431	-0.543993	-0.582352
P17987	-0.589378	-0.556891	-0.718195	-0.60848	-0.194244	-0.521886	-0.6379	-0.631218	-0.39338	-0.560639	-0.357659	-0.502923	-0.608401	-0.769141	-0.477665	-0.531333	-0.391864	-0.181275	-0.307151	-0.514502	-0.447483	-0.0945403	-0.39432	-0.911248	-0.257241	-0.387333	-0.5469
O43692	0.0635842	-0.0271522	0.182673	-0.0327638	-0.779572	0.263025	-0.281899	-0.168173	0.414808	0.265542	-0.120918	-0.528643	-0.376164	-0.641433	-0.0160679	0.0306202	-0.153246	-0.282236	-0.166497	-0.614334	-0.68586	-0.405191	0.134605	0.297798	0.06824	0.392303	0.377801
P42702	-0.144365	-0.371423	0.0752986	0.137162	-0.156242	-0.407312	-0.51228	0.251977	0.329679	0.296813	0.150652	-0.446655	-0.200329	-0.806933	-0.54714	-0.473372	-0.155317	-0.0777033	-0.0430818	0.110555	-0.255779	0.0960755	0.204157	-0.432941	-0.58788	0.453733	0.117403
P50990	-0.436577	-0.811979	-0.331425	-0.51123	-0.6616	-0.471909	0.00242164	-0.426537	-0.601304	-0.410641	-0.435317	-0.0174475	-0.30492	-0.090601	-0.36433	-0.340821	-0.178641	-0.510089	-0.547253	-0.665674	-0.495437	-0.0988632	-0.181475	-0.449937	-0.360898	-0.293677	-0.833258
Q9H3G5	-0.380655	-0.357727	-0.154874	0.0789643	0.1063	-0.0453039	0.369201	0.0579715	0.0352686	-0.399376	-0.180596	-0.41225	-0.262655	-0.600435	-0.478617	-0.524033	-0.297184	-0.576998	-0.138207	-0.731	-0.442752	0.0356015	-0.141775	-0.544948	-0.313417	0.354549	-0.345959
P63241	-0.668544	-0.440736	-0.680392	-0.4903	-0.880199	-0.347248	-1.01579	0.13374	-0.409702	-0.359896	-0.56392	-0.702499	-0.626036	-0.391867	-0.0811379	-0.384889	-0.092588	-0.595681	-0.356598	-0.366233	-0.461823	-0.312648	-0.381838	-0.539955	-0.158164	-0.439135	-0.327963
P21217	0.128993	-0.0252787	-0.34707	-0.2035	-0.0152197	-0.143749	-0.6234	-0.388775	-0.628496	0.089275	-0.452459	-0.298196	-0.0890163	-0.24965	-0.20633	-0.237096	-0.589282	-0.534279	0.0752537	-0.301244	-0.255753	-0.587064	-0.170918	-0.253805	-0.58989	-0.606896	-0.153669
O75976	-0.257241	-1.37257	-0.241488	0.0560151	-0.351432	-1.15188	-0.295014	-0.800115	-0.219028	-0.334613	-0.894295	-0.692978	-0.692863	-0.326258	-0.196475	-0.694396	-1.00108	-1.05485	-1.08338	-0.383335	-1.08159	-0.982914	-0.474295	-1.19029	-0.575791	-0.152838	-0.307211
P00352	0.292813	0.1118	0.117949	0.13704	0.11566	0.113799	0.377333	0.287817	-0.535628	0.286154	-0.0686467	-0.1242	0.000777667	0.377362	-0.173907	-0.24515	0.334729	0.0103662	0.300655	-0.0200105	-0.447975	0.22375	0.253497	0.575033	0.184065	1.4097e-08	0.262576
P36268	-0.173794	-0.60245	-0.754899	-0.66787	-0.461888	-0.161344	-0.432198	-0.575484	-0.385142	-0.669107	0.0383218	-0.706476	-0.538858	-0.499949	-0.794747	-0.434513	-0.27724	-0.409769	-0.237728	-0.0664268	0.134166	1.4097e-08	-0.175048	-0.68675	-0.268008	-0.210488	-0.427491
P41271	0.603	0.262904	0.306964	-0.751278	0.289833	0.36045	0.0718213	0.373554	0.780484	0.390443	0.467312	0.710263	0.18848	-0.337445	0.159557	-0.994641	-0.74159	0.277849	0.472264	0.578327	0.382778	0.55915	1.00378	-1.4828	0.111784	0.492067	0.196785
P62826	-0.713618	-0.440818	-0.573895	-0.79919	-1.10085	-0.540461	-0.502799	-0.171901	-0.507606	-0.368662	-0.394242	-0.380371	-0.789429	0.300465	-0.24244	-0.201385	0.0226615	-0.753674	-0.335731	-0.384305	-0.443239	-0.346964	-0.328937	0.044857	-0.297616	-0.672222	-0.443976
P98095	0.125263	-0.0568786	-0.59932	-0.0539627	0.479229	-0.231762	0.508786	0.627194	-0.448033	0.221853	0.209955	-0.418612	-0.182851	-0.685758	-0.83161	-0.332211	-0.42585	-0.133033	-0.34714	-0.229617	-0.30682	-0.232704	-0.352054	-0.59358	0.178405	-0.0238948	-0.0389185
Q92484	0.0375906	-0.387123	-0.238507	0.339655	-0.805192	-0.506706	-0.609146	-0.246658	0.251509	-0.116993	0.250431	0.0349035	-0.337443	0.0800548	0.290188	-0.13457	0.0495323	-0.118352	-0.103813	-0.109021	-0.0703612	-0.717895	-0.360939	0.53837	-0.470089	-0.018565	0.27133
Q6UX06	-0.15734	-0.295743	-0.612184	-0.480339	-0.707504	-0.685801	-0.021168	-0.761505	-0.270129	-1.00851	-1.07785	-1.12074	-0.453213	-0.544515	-0.370314	-0.961101	-0.201426	-0.946344	-0.153409	-0.189501	-0.170913	-1.08967	-0.217965	0.087496	-0.176284	-0.568648	-0.771356
Q075Z2	-0.47673	-1.15025	-0.438777	-0.229596	-0.310451	1.4097e-08	-0.105941	-0.139601	-0.564875	-0.526442	-0.299416	-0.630685	-0.745018	0.167381	-0.812781	-0.20555	0.00118765	-0.447547	-0.89783	-1.04688	-0.509331	0.0449856	-0.507568	0.193082	-0.898605	-0.153741	-0.550718
Q9NRW1	-0.0129066	-0.143712	0.0348202	-1.54319	-0.175324	-0.0917605	-0.377743	-0.0687123	0.110491	-0.112732	0.207431	-0.00637407	0.135007	-0.0203515	-0.244097	-0.149202	-0.0816147	0.35948	0.2893	0.351997	0.394594	0.457305	0.722051	0.0329508	-0.0576423	-0.0136164	0.435993
P28799	-0.125378	-0.355766	-0.266042	-0.00541247	-0.268323	-0.606333	-0.746797	-0.665884	-0.426505	-0.297256	-0.893693	-0.146244	-0.54611	-1.13469	-0.815612	-0.974978	-1.22032	-0.579178	-0.852912	-0.585989	-0.643026	-0.770093	-0.513091	-0.835725	-0.629097	-0.597911	-0.388883
P05090	-0.291447	-0.950799	-0.294393	-0.54012	-0.503735	-0.417995	-0.558581	-0.350537	-0.113964	-0.122634	-0.411854	-0.154652	-0.00500283	-1.02738	-0.475818	-1.03069	-0.680276	-0.751184	-0.796241	-0.707584	-0.655456	-0.812146	-1.48005	-0.591361	-0.200035	-0.503452	-0.481406
P68402	-0.400118	-0.365609	-0.634899	-0.874477	-0.508439	-0.261491	-1.10353	-0.0482512	-0.497739	-0.591657	-0.943159	-0.89989	-0.686514	-0.856641	-0.522458	-0.823115	-0.734309	-0.454767	-0.595488	-0.364829	-0.423124	-0.387056	-0.239958	-0.600994	-0.617037	-0.644517	-0.621332
B9A064	-0.413077	-0.960976	0.686162	-0.202849	-0.0187681	-0.790972	0.0262981	-0.78874	-0.749367	-0.381886	-0.623958	-0.751523	-0.393644	-0.191532	-0.287222	-0.401995	-0.557842	-0.233364	0.447397	-0.340157	-0.726035	-0.368396	-1.29304	0.130254	0.546598	-0.294953	0.101471
P68366	0.162254	0.397412	-0.384141	-0.432578	-1.02877	-0.198207	-0.143399	0.153858	-0.0117477	-0.147724	-0.268105	0.0948665	0.0879797	-0.39625	-0.355657	-0.567658	-0.280295	-0.495687	0.0400814	-0.663599	-0.238967	-0.408729	-0.177319	-0.32009	-0.206026	-0.240689	-0.250381
P00491	-0.325125	-0.194393	-0.203913	-0.542763	-0.520005	-0.712106	0.0693956	-0.285383	0.247795	-0.338765	-0.137645	-0.581112	-0.741369	-0.363322	-0.59134	-0.85062	-0.0170033	-0.469788	0.251272	-0.377217	0.0668569	-0.0850316	-0.345435	-0.801596	-0.51891	-0.125382	-0.0803112
O15296	-0.611308	-1.66683	-1.3815	-0.395423	-1.277	-0.876479	-1.72357	-0.707995	0.21939	-0.358574	-0.53044	-0.777645	-0.557378	-1.5891	-0.531525	-1.45427	-0.736985	-0.52357	-0.970039	-0.56443	-1.40724	-0.739053	-0.599596	-1.20666	-0.548052	-0.895763	-0.468859
P09543	-0.319598	-0.243868	-0.970611	-0.0746748	-0.540491	-0.190762	-0.820163	-0.339382	-0.0700554	-0.41665	-0.112003	-0.52879	-0.5172	-0.241238	-0.260819	-0.79721	-0.833053	-0.270361	-0.476074	-0.0590833	0.057549	-0.215524	-0.168588	-0.569564	-0.3259	-0.308468	-0.172481
P30046	-0.33536	-0.216051	-0.371057	-0.0701085	-0.0397709	-0.15016	-0.280336	-0.267235	-0.180837	-0.568797	-0.224117	-0.00766019	0.0411051	-0.114072	-0.084392	-0.0310949	-0.0997804	-0.0389445	-0.336713	-0.118064	-0.00888532	-0.290894	-0.0121273	-0.222833	-0.293892	-0.249312	-0.51108
P02743	0.0293471	0.0206307	0.0437674	-0.00963505	-0.114367	-0.168834	0.450893	0.125043	-0.363073	-0.444151	-0.466146	-0.157358	-0.383762	-0.158484	-0.879223	-0.587074	-0.199968	0.0157282	-0.589377	-0.458834	-0.257311	-0.539369	-0.474988	-0.139755	-0.667999	0.25569	-0.568316
P05156	-0.572583	-0.649312	-0.0741066	-0.721866	-0.714181	-0.773904	-0.613113	-0.572449	-0.613485	-0.645789	-0.444974	-0.464344	-0.414266	-0.262049	-0.731393	-0.998314	-0.324168	-0.679725	-0.41537	-0.497186	-0.366467	-0.483409	-0.556179	-0.724409	-1.07127	-0.366155	-0.469519
P62879	-0.282778	-0.159858	-0.228376	-0.701704	-0.536908	-0.275557	-0.763661	-0.530288	-0.395654	-0.182051	-0.300055	-0.431856	-0.699639	-0.250631	-0.0616286	-0.0652143	-0.53322	-0.15451	-0.10251	-0.122667	-0.0662717	0.0156193	0.0878628	0.010126	-0.371657	-0.374186	-0.376009
Q99832	-0.420332	-0.370023	-0.410907	-0.709159	-0.705962	-0.655025	-0.375198	-0.566364	-0.496601	-0.536637	-0.404845	-0.467359	-0.481018	-0.0688598	1.4097e-08	-0.155372	-0.342087	0.00655469	-0.344959	-0.686952	-0.152981	-0.0959678	-0.0926566	-0.299945	-0.182858	-0.415932	-0.319597
P61006	-0.322784	-0.194958	-0.143725	-0.0383165	-0.13627	-0.0972326	-0.381812	1.4097e-08	0.0744489	-0.196524	-0.110411	-0.2008	-0.145314	0.180025	0.161446	-0.102	-0.189731	-0.0839678	-0.0897548	0.16109	0.351908	-0.863086	0.628409	-0.312492	-0.0285781	-0.0474656	-0.164122
Q9HC38	-0.270024	-0.333973	-0.668726	-0.0444914	-0.0574058	-0.175979	-0.312756	-0.0439798	-0.185965	-0.101051	-0.268966	-0.554987	-0.0343417	-0.317214	-0.34526	-0.15116	-0.135115	-0.320608	-0.311875	-0.16395	-0.274754	-0.0575039	0.0498526	-0.318413	-0.301223	-0.316057	-0.278278
Q9UL46	-0.257319	-0.556691	-0.519867	-0.333066	-0.37515	-0.0444644	-0.817036	-0.756653	-0.437647	-0.72053	-0.794788	-0.668949	-0.245294	-0.234163	-0.0662946	-0.334114	-0.729887	-0.741304	-0.607602	-0.841787	-0.92494	-0.680644	-0.615227	-0.318553	-0.298294	-1.34462	-0.0996899
Q15435	-0.374848	-0.261803	-0.387566	-0.476563	0.0348608	-0.466704	-0.317128	-0.208401	-0.186608	-0.35578	-0.438495	-0.491915	-0.302907	-0.518504	-0.386265	-0.385623	-0.338566	-0.29501	-0.509131	-0.279935	-0.362976	-0.0228296	-0.189778	-0.47182	-0.00949552	-0.475943	-0.379041
O14786	0.0468944	-0.244691	-0.168394	-0.410293	0.0281209	-0.147684	-0.352387	-0.772676	-0.685683	-0.0589474	-0.453676	-0.296443	-0.508093	-0.855808	-0.596374	-0.527347	-0.621557	-0.711619	-0.53252	-0.497526	-0.535444	-0.829052	-1.97987	-0.0195892	-0.754938	-0.638599	-0.213954
P49908	-0.407088	-0.606912	-0.278456	-0.327212	0.299593	-0.196705	-0.337641	-0.206741	0.020828	0.0576997	-0.323582	-0.505802	-0.18194	-0.532887	-0.0381092	-0.0314617	0.0147911	-0.246896	-0.598421	0.243259	-0.411194	-0.292976	-0.188986	-0.113004	-0.0919712	-0.137168	-0.136527
Q93099	-0.283028	-0.369464	-0.505131	-0.348278	-0.645234	-0.294601	-0.62068	-0.474431	-0.0311898	-0.509024	-0.234566	-0.273914	-0.0981736	-0.329877	-0.283855	-0.492001	-0.748047	-0.418587	-0.114471	-0.0562818	-0.410478	-0.161962	-0.0870459	-0.559631	-0.680743	-0.508196	-0.411291
P15586	-0.338601	-0.386071	-0.297407	-0.284723	-0.354649	-0.00898053	-0.571224	-0.610375	-0.323682	-0.333238	-0.132946	-0.548594	-0.507428	-0.0399026	-0.147813	-0.170899	-0.204626	0.0428492	-0.047353	0.0436242	-0.0755758	-0.118188	0.111384	-0.596	0.124746	-0.597993	-0.323735
P61981	-0.565569	-0.305358	-0.488864	-0.476764	-0.631232	-0.445808	-0.787082	-0.511351	-0.244441	-0.707029	-0.475531	-0.591544	-0.533258	-0.66569	-0.410488	-0.520405	-0.753802	-0.388067	-0.413777	-0.307335	-0.347264	-0.369815	-0.122388	-0.751595	-0.265311	-0.599509	-0.324192
Q14894	-0.564825	-0.303765	-0.692725	-0.663344	-0.207422	-0.393611	-0.841868	-1.28713	-0.516103	-0.446422	-0.576147	-0.999211	-0.468929	-0.19521	-0.250558	-0.631194	-0.419695	-0.480574	-0.366528	-0.0119174	-0.184126	-0.0454426	0.165692	-0.473303	-0.645681	-0.501023	-0.281931
P26641	-0.70423	-0.433398	-0.261011	-0.593898	-0.325707	-0.765375	0.00107917	-0.194248	-0.804756	-0.503932	-0.940387	-0.582833	-0.303192	-0.117481	-0.544255	-0.0951409	-0.218665	0.134551	-0.44293	-0.950238	-0.25158	-1.14563	-0.80115	-0.797917	-0.301431	-0.0716245	-0.910086
O14672	-0.82399	-0.578107	-0.486413	-0.366789	-0.501655	-0.553268	-0.572568	-0.729124	-0.449974	-0.305682	-0.271741	-0.260808	-0.187227	-2.25599	-0.534089	-0.869181	-0.793338	-0.803163	-0.487542	-0.071336	-0.487339	-0.268319	-0.441183	-0.497002	-0.382209	0.0342134	-0.446691
Q99985	-0.579508	-0.568573	-0.0625776	0.0887766	-0.202514	-0.267782	-0.740207	-0.331192	-0.417266	-0.166295	-0.451154	-0.227862	0.163648	-0.0629231	0.64874	-0.414024	-0.237627	-0.213407	-0.702449	-0.198338	-0.488005	-0.208393	-0.0508275	-0.563084	-0.388495	-0.706963	0.232046
Q53GD3	0.393968	1.4097e-08	0.167483	0.0655426	0.191525	0.345186	0.259853	0.560493	0.132796	0.0260108	0.363354	-0.121405	0.154849	0.79672	0.242035	-0.246147	0.203869	0.430543	0.495846	0.584714	0.589786	0.209331	0.617772	-0.919944	-0.0603107	0.243401	0.195358
P04217	-0.992973	-0.118179	0.590784	-0.0969128	-0.0287207	-0.827496	0.204139	-0.127274	-1.32518	-0.348161	-0.354208	-0.209647	-0.417307	0.0485239	-0.811926	0.642607	0.124495	0.378175	0.16226	-0.242787	-0.0312907	-0.272117	-0.244351	0.460511	-0.402849	-0.529993	-0.212464
O43291	0.852148	1.46922	0.988817	1.46982	1.15225	1.54427	0.847874	1.59969	1.09879	1.10282	1.53095	1.14171	0.898505	-0.172999	-0.0743901	0.103115	0.602684	0.597223	0.837344	0.733422	0.813587	0.864968	0.868272	0.760744	1.38773	1.50955	1.45717
P34059	-0.577592	-0.391873	-0.320109	-0.159943	-0.901159	-0.489435	-0.44308	-0.735603	-0.197136	-0.277908	-0.454209	-0.261061	-0.368638	-0.0258335	-0.0371378	-0.279788	-0.374666	-0.66508	-0.597104	-0.496356	-0.705539	-0.496908	-0.209284	-0.560457	-0.0906163	-0.403145	-0.39907
P60900	-0.0697852	0.0341737	-0.107039	0.0232291	0.0489546	-0.000748334	0.085619	0.132753	-0.255735	0.00980454	0.109775	-0.120043	-0.163092	-0.302149	-0.0865568	-0.109081	0.190744	-0.0966349	-0.250468	-0.156281	-0.0286877	-0.049792	0.20441	0.205922	-0.468956	0.101123	-0.0922854
P17066	0.321498	0.486458	0.333123	0.396525	0.315418	0.212765	0.522944	0.637998	0.50556	-0.664662	0.694093	0.622884	0.388234	0.632429	0.642863	0.0830619	0.600868	0.6329	0.569082	0.43426	0.658557	0.670128	0.724229	0.138939	0.692437	0.550658	0.466083
P50991	-0.517347	-0.449792	-0.492358	-1.05457	-0.571309	-0.885618	-0.423603	-0.464367	-0.543389	-0.604669	-0.476739	-0.446777	-0.329602	-0.350776	-0.625022	-0.5265	-0.516391	-0.370644	-0.782168	-0.661804	-0.262396	-0.176331	-0.239144	-0.621568	-0.41886	-0.470728	-0.771666
Q6UW15	0.521708	-0.352127	-0.0695173	0.179838	-0.173655	-0.500241	-0.229977	-0.378115	-0.955878	0.164707	0.143293	-0.313784	-0.562167	0.0317603	0.253572	-0.429209	-0.433262	-0.436448	0.0125309	-0.728981	-0.229724	0.346185	-0.499124	0.107646	-0.403713	-0.256554	0.042315
Q9BUD6	-0.288004	0.0627565	0.00270608	0.260837	0.166176	-0.155917	-0.521665	0.213823	0.175638	0.21531	0.294174	-0.415825	0.128153	0.037112	0.623296	0.230922	0.172358	0.0677892	-0.392179	0.723631	0.228483	0.0574706	0.319365	0.597893	0.298284	-0.115231	0.603172
P35527	0.313782	0.1288	-0.206381	0.254293	-0.199033	-0.751059	-1.23558	-0.734407	-0.728781	0.00604782	0.723989	-0.155519	0.839872	-0.269146	-0.26245	-0.488348	0.902434	-0.156587	0.318582	0.243059	-0.0769887	0.194683	0.630431	-1.99238	-0.30474	-0.309983	-0.175887
Q96DA0	0.0385989	0.072663	0.0824386	-0.417303	-0.532811	0.584445	-0.0447376	0.0482968	-0.537809	-0.402526	-0.482778	0.310936	-0.604636	0.348042	-0.530278	0.43413	-0.406923	0.657839	0.31971	0.303318	0.642558	0.545738	0.490259	0.121684	-0.109407	-0.872374	0.237949
Q96PH6	-0.0257011	-0.121293	0.0103558	-0.0881213	-0.477536	0.475433	0.37287	0.273796	-0.0926301	0.168927	0.0403831	0.146737	-0.0676791	0.138159	-0.439191	-0.793382	0.447407	-0.250772	-0.243029	-0.376118	-0.0711229	-0.0813544	0.329166	-0.220687	-0.363837	0.0846037	-0.440893
P31946	-0.450166	-0.509873	-0.404751	-0.61941	-0.581408	-0.635898	-0.765184	-0.418945	-0.674687	-0.429405	-0.0842786	-0.248808	-0.00518741	-0.578745	-0.817095	-0.461438	-0.715772	-0.431319	-0.475163	-0.486782	-0.358878	-0.0636383	-0.180053	-0.793737	-0.140318	-0.540758	-0.395327
O75369	-0.446547	-0.495899	-0.537342	-0.434549	-0.816496	-0.6455	-0.675284	-0.716449	-0.469748	-0.594065	-0.771978	-0.597599	-0.521058	-0.547121	-0.556961	-1.00794	-0.777558	-0.4299	-0.287907	-0.243177	-0.517372	-0.418562	-0.951345	-1.00915	-0.611683	-0.640146	-0.633745
P30153	-0.44874	-0.268803	-0.693243	-0.647728	-0.336229	-0.47771	-0.397021	-0.416344	0.0377037	0.0305562	-0.526624	-0.319896	-0.208515	-0.0965822	0.168415	-0.338234	-0.47343	-0.305322	-0.23975	-0.335959	-0.104394	-0.305135	-0.0931582	-0.424482	-0.301163	-0.249118	-0.010911
P18669	0.0182673	0.126801	0.113745	-0.338536	0.152347	-0.20358	-0.116223	-0.0135941	0.0170138	0.120099	-0.115727	0.100033	0.530139	-0.102616	-0.0210844	-0.155678	-0.270765	-0.274513	0.0509493	-0.255623	0.0498677	0.185072	-0.0999209	-0.27738	-0.18889	-0.154909	0.487996
Q9NS25	-0.166508	-0.499315	0.239558	0.719251	0.391846	0.391357	0.512306	0.969709	-0.00701731	-0.119893	0.354678	0.29621	-0.289935	0.365909	-0.531557	0.3243	1.00814	0.521289	0.207425	0.196822	-0.0346377	-0.263742	0.0148988	-0.398917	-0.437593	0.906041	-0.725462
P84243	-1.61246	-0.091965	-0.261751	0.245369	0.352329	-0.0223517	0.979862	0.714494	0.141773	-0.121264	-0.52049	-0.240103	-1.26987	0.0355704	-0.974555	-0.194019	0.52629	-0.267251	-0.631421	-0.635879	-0.397969	-0.51796	-0.17742	0.238352	0.439577	0.221473	-0.809639
O95994	-0.00338787	0.361394	-0.373397	-0.742268	-0.265654	-0.475554	-1.0007	-0.924338	-0.181163	-0.0789358	-0.679715	0.0363089	0.248339	-0.00486095	-0.326796	-1.07604	-0.676402	-0.958655	-0.263497	-0.270763	-0.313786	-0.260085	-0.411753	0.177642	0.12305	-0.966814	0.182155
O94760	-0.315416	-0.616208	-0.247246	-0.601329	-0.330288	-0.472658	-1.0333	-0.752056	-0.326745	-0.668469	-0.254521	-0.464672	-0.331845	0.126509	-0.347438	-0.502095	-0.637892	-0.425628	-0.451326	-0.099386	-0.539059	-0.127923	-0.0775641	-0.469066	-0.473492	-0.750679	-0.664709
Q8NHP8	-0.398085	-0.408002	-0.473734	-0.155398	-0.690561	-0.293515	-0.567398	-0.430651	-0.273277	-0.035667	-0.182639	-0.430756	-0.624358	-0.290964	-0.116691	-0.644504	-0.235072	-0.349626	-0.458159	-0.0962137	-0.382656	-0.116626	-0.433076	-0.190111	-0.144147	-0.50454	-0.187835
P29401	-0.60843	-0.554708	-0.361206	-0.869982	-0.739532	-0.721533	0.339499	-0.54971	-0.710799	-0.249418	-0.924886	-0.785196	-0.331663	-0.25926	-0.472512	-0.95822	-0.762283	-0.430932	-0.325441	-0.452214	-0.534741	-0.19542	0.0431296	-0.310601	0.340443	-0.505872	-0.584526
P52788	-0.00920716	-0.227397	-0.540342	-0.268669	-0.289505	-0.0283859	-0.714236	-0.326514	0.214928	-0.136865	-0.0950413	-0.00165001	0.0282491	-0.143609	0.18361	-0.442017	-0.485078	0.0712689	-0.33747	-0.201392	-0.161663	-0.270411	0.347764	-0.409421	-0.22516	-0.172653	-0.109365
P01860	0.0248397	-0.116902	0.586454	-0.314088	0.384936	-0.0287552	0.261081	-0.224243	-0.156343	-0.27076	0.389402	0.213003	0.345721	-0.711319	0.118736	-0.0412013	-1.01977	0.301261	1.16025	0.0867083	0.0859765	0.191221	0.434115	0.494002	0.463072	0.566492	-0.141466
P10323	-0.726449	-0.638385	0.01908	0.578368	0.293065	0.298725	0.918165	0.800445	-0.139229	-0.555434	0.322788	-0.0420042	-0.773532	-0.214897	-1.9696	-0.0942481	0.0294464	-0.0430821	-0.253299	-0.660862	-0.295028	-0.779788	-0.996263	0.264526	-1.2265	0.470377	-0.0202462
Q9BWD1	-0.0594157	-0.136756	-0.386213	0.262457	-0.167456	-0.127003	-0.817824	-0.392405	0.185282	-0.0247847	0.0899105	0.182265	0.146145	0.0787499	0.474185	0.369699	0.279497	0.0923428	-0.20172	0.0379253	-0.0338776	0.0808075	0.173868	-0.0847027	-0.379479	-0.338446	0.0049954
P09972	-0.120897	-0.0137301	-0.111375	-0.315056	-0.191435	0.16935	-0.101561	-0.145536	-0.254208	-0.221404	-0.444796	-0.224928	-0.0531715	-0.205575	-0.33732	0.20108	-0.0346203	0.0571656	-0.0842438	0.0104032	-0.18023	0.03186	-0.916512	-0.475991	-0.111263	-0.304984	-0.608705
P02652	-0.492719	-0.838798	1.1153	-1.11199	-1.00541	-1.06703	-0.912908	-1.33979	-0.800023	-1.01299	-0.461835	-0.432607	-0.620696	-0.518424	-1.46705	-0.340407	-1.35938	-0.575015	-0.332087	-0.208516	-0.35871	-0.572671	-0.193656	0.494833	-0.338267	-0.958222	-0.481237
Q9H4G4	-0.336773	-0.178013	-0.36573	-0.0400219	-0.0442939	-0.00986881	-0.426071	-0.284616	-0.104157	-0.131001	0.0410826	-0.360202	-0.194531	0.130664	-0.265142	-0.526796	-0.268569	-0.266307	0.165841	0.0932341	-0.189164	-0.270217	-0.189283	-0.319816	-0.123196	-0.223154	-0.0910062
Q9HC84	-1.68231	0.306133	-0.969827	-1.49873	-0.241653	-1.65449	-0.0253246	-0.0645242	-0.0348168	-1.30553	-0.573753	0.284749	-1.1501	0.207915	-0.426551	0.804146	-0.22535	0.500379	0.074154	-0.10745	0.197269	0.0634729	-1.26744	-0.815554	0.527469	-0.997651	-1.48818
O43286	0.288205	0.384935	0.158472	0.411462	-1.56833	0.118491	0.431188	0.255697	0.00590199	-0.00753656	-0.175627	-0.147581	-0.205167	-0.0481418	-0.00297946	0.12666	-0.168351	0.179977	0.425324	0.0182783	0.256193	0.170497	-0.0466775	0.336654	-0.058932	-0.161785	0.450242
P25789	-0.346185	-0.213876	-0.277315	-0.33715	-0.474268	-0.0871211	0.103195	-0.107324	-0.372711	-0.206853	-0.150785	-0.325234	-0.209618	-0.266917	-0.242278	-0.298406	0.14346	-0.12214	-0.242238	-0.724617	0.26266	0.0864295	-0.320448	-0.671248	-0.349037	-0.245297	-0.479378
Q15907	-0.257031	-0.170429	-0.278615	-0.201977	-0.389277	-0.35021	-0.456843	-0.377115	-0.249277	-0.921288	-0.0294171	-0.0787169	-0.171476	-0.610106	-0.302666	-0.586733	-0.432979	-0.285733	0.299661	-0.198967	0.0231937	0.0357167	0.0771084	-0.576394	-0.31464	-0.34281	-0.428112
Q9BTY2	-0.263572	-0.298045	-0.414707	-0.0664025	-0.743634	-0.102266	-0.722712	-0.30042	-0.772524	-0.0300652	-0.591982	-0.357627	-0.515164	-0.525901	-1.21315	-0.755455	-1.06449	0.071499	0.0606895	-0.413507	-0.259434	-0.678352	-0.445973	-0.655841	-0.470929	-0.603734	-0.519067
Q16270	-0.918158	-0.675068	-0.549399	-0.681282	-0.99828	-0.831086	-0.845867	-0.648316	-0.648076	-0.387548	-0.55305	-0.802998	-0.44991	-1.14879	-1.20875	-0.829218	-1.31417	-0.976676	-0.763163	-1.15591	-0.89862	-1.06417	-0.822815	-1.22337	-0.839944	-0.612562	-0.660911
P61204	-0.533039	-0.209654	-0.485642	-1.11647	-1.07153	-0.794452	-0.724821	-0.35873	-0.267623	-0.605601	-0.476533	-0.70092	-0.690825	-0.363198	-0.6274	-0.367578	-1.02002	-0.132968	-0.369005	-0.0918622	0.00514981	0.0545575	-0.229744	-0.693222	-0.245281	-0.424532	-0.806252
P05060	-0.571729	-0.632694	-0.24648	-0.328972	-0.318012	-0.394676	-0.724329	-0.200522	-0.782149	-0.251425	-0.388018	0.251237	-0.393674	-1.1141	-0.595532	-0.588469	-1.59502	-0.451488	-0.408339	-0.614642	-0.717239	-1.05558	-1.13265	-0.260056	-0.50473	-0.424931	-0.95493
P29622	-0.798422	-0.457072	-0.931221	-0.368455	-0.25996	-0.282469	0.104226	-0.52693	-0.29249	-0.306685	-0.341058	0.12006	-0.334675	-0.290614	-0.291921	-1.04874	-0.658821	-0.533047	-0.414532	-0.648882	-0.668417	-0.700682	-0.287572	-0.53092	-0.426597	0.372999	1.4097e-08
P52209	-0.287947	-0.342643	-0.350758	-0.402674	-0.275104	-0.354269	0.00275254	-0.305799	-0.235882	-0.620628	-0.36298	-0.351684	-0.263134	-0.455561	-0.273178	-0.121997	-0.154675	-0.145497	-0.39102	-0.655547	-0.202137	-0.174489	-0.361051	-0.624233	0.0214796	-0.370104	-0.580042
O00292	-0.296233	-0.525219	-0.228163	-0.681255	-0.741348	-0.0431205	-0.555707	-0.372906	-1.09372	-0.0810502	-0.542591	-1.11914	-1.00457	-0.688374	-0.257218	-0.0740554	0.208397	-0.70873	-0.49964	-0.915803	-0.727618	-0.485776	-0.21698	-0.394151	-1.21821	-0.649875	-0.669825
P36873	-0.542739	-0.753761	-0.0912349	-0.540295	-0.926414	-0.844767	-0.249364	-0.561396	-0.257881	-0.597448	-0.748769	-0.85473	-0.76557	-0.594972	-0.520743	-0.757328	-1.17173	-0.490795	-0.639106	-0.821214	-0.6103	-0.521554	-0.610272	-0.811059	-0.438854	-0.554675	-0.74902
Q9UBR2	-0.127754	-0.0700073	-0.254828	-0.224003	-0.324157	-0.172295	-0.547833	-0.505195	-0.237052	0.0693044	-0.056629	-0.160219	0.113859	-0.346844	-0.263913	-0.438961	-0.519972	-0.159272	-0.194683	-0.0747093	0.0853999	-0.114233	-0.360103	-0.542998	-0.379514	-0.478132	-0.174255
P01861	0.281637	0.430062	1.43274	0.603507	0.351691	0.517632	0.405985	-0.221988	-0.365456	-0.343008	0.0595837	0.00747633	0.823951	0.0966622	-0.0920052	0.231654	-0.0220379	0.651728	0.29869	-0.52821	-0.336906	0.135253	0.630565	-0.968565	0.506946	0.794534	0.831821
O60701	-1.00826	-0.467956	-0.36573	-0.218074	-0.725854	-0.605466	-0.71568	-0.817299	-0.132297	-0.506782	-0.389939	-0.799161	-0.716535	-0.393686	-0.983878	-1.23873	-0.571833	-0.482072	-0.638182	-0.466824	-0.366093	-0.455123	-0.229382	-0.749922	-0.18442	-0.870831	-0.502421
O75969	-0.653208	-0.84024	-0.778016	-0.509656	-0.773203	-0.795314	0.321579	-0.186085	-0.20654	-0.559482	-0.732802	-0.722652	-0.694198	-0.685175	-0.639017	-0.900024	-0.782149	-0.176099	-0.491404	-1.28454	-0.21693	-0.743522	-1.03444	0.00423679	-0.729716	0.206978	-1.01424
P15907	-0.56171	-0.809089	-0.780212	-0.315841	-1.05275	-0.44895	-1.0819	-0.597174	-0.825268	-0.396161	-0.519875	-0.160031	-0.796998	-0.548794	-0.445206	-0.973814	-1.3244	-0.635453	-0.625742	-0.299361	-0.274451	-0.710534	-0.803422	-1.54998	-0.845959	-0.888589	-0.632052
P40189	-0.340294	-0.156021	-0.0530509	-0.236444	-0.553355	-0.185458	-0.507918	-0.620064	-0.311222	-0.501394	-0.0556818	-0.622468	-0.493113	-0.188485	-0.0998334	-0.244154	-0.821548	-0.240937	-0.0910201	-0.108247	-0.238004	-0.290935	-0.307863	-0.393294	-0.452939	-0.467654	-0.377305
Q9Y5Z4	-0.457372	-0.240005	-0.381001	-0.440422	0.158318	-0.265451	-0.817609	-0.624318	-0.0792084	-0.153451	-0.152373	-0.283049	-0.0758568	-0.109328	-0.0465789	0.326734	-0.0953494	-0.257906	-0.236496	-0.0532102	-0.0704339	-0.144318	0.184452	-0.408313	-0.14726	-0.237106	-0.224869
Q86VP6	-0.660106	-0.475934	-0.790671	-0.587694	-0.756926	-0.359178	-0.0515661	-0.0473476	-0.266723	-0.356342	-0.696019	-0.368931	-1.18407	-0.712114	-0.444399	-0.4065	-0.0593155	-0.384804	-0.572146	-1.13092	-0.429884	-0.345234	-0.506356	-0.496942	-0.467399	-0.16231	-0.52187
Q92743	-0.40987	-0.401644	-0.457265	-0.188097	-0.547719	0.325453	-0.309594	-0.452191	-0.455625	-0.281188	-0.629556	-0.531227	-0.946655	-0.833478	-0.544813	-1.0497	-0.753411	-1.15723	-0.224592	-0.822906	-0.730685	-0.152858	-0.313552	-0.53105	-0.443567	-0.124509	-0.990624
Q15084	0.0147798	0.178009	-0.490723	-0.0750132	0.0504761	0.12108	0.347393	0.263778	-0.114155	0.00464919	-0.393568	0.037678	-0.217512	0.0282807	0.210816	0.196202	0.563384	-0.264602	-0.393944	-0.516444	-0.29656	-0.460199	-0.066854	-0.125679	0.186515	0.329602	0.112074
Q8IZP9	-0.134955	0.0464365	-0.0684676	0.390316	0.356839	0.364264	0.0930115	0.222927	-0.229576	0.486532	0.11026	0.324285	-0.302638	-0.336442	-0.129178	0.343317	0.483163	0.109116	0.398695	0.243995	0.180638	0.142681	0.458938	0.347479	-0.443032	0.160664	-0.101229
Q96BH3	0.168695	0.420792	0.652338	0.648246	0.571585	0.488434	0.73352	0.384968	0.297838	0.673297	0.837646	0.194433	0.113204	0.570609	0.396751	0.290584	0.5042	-0.126345	0.238096	0.0129772	0.519997	0.866756	0.644977	0.6957	-0.0678776	0.800115	-0.0513535
Q9BRK5	0.214584	0.454561	-0.0192689	0.525174	0.311506	0.251483	-0.08293	0.183353	-0.0589988	-0.0151451	-0.0497004	0.105513	0.00831155	0.111802	0.295605	0.234034	-0.116726	-0.288607	0.0225497	-0.52591	-0.474902	-0.182951	-0.71389	0.267277	-0.0853108	-0.225257	0.36533
Q9UNW1	-0.0160813	0.18279	-0.0578201	0.0260262	0.0257006	-0.205016	-0.0150406	-0.194103	-0.039961	0.244092	-0.184055	-0.105314	-0.15258	-0.0768894	0.249182	0.203476	0.0893052	-0.307458	-0.402492	-0.495418	-0.845751	-0.280552	-0.321868	0.130269	-0.419523	-0.291282	-0.0450487
Q96JG6	-0.512772	-0.200289	1.96248	2.1916	1.87411	1.93606	2.07742	1.81593	1.20724	2.22905	1.38843	1.64601	1.69129	2.18687	2.12521	2.80228	2.17347	2.40564	1.70027	2.11876	1.42927	1.01413	0.230406	2.26699	2.24771	1.48916	1.60781
O00423	0.51247	0.833857	-0.684034	1.17958	1.03817	1.07916	0.672881	1.01398	-0.0254032	1.0995	0.03482	0.659052	0.8185	-0.192988	-0.03633	0.311489	0.772328	0.570786	0.214029	0.933722	0.291749	0.896744	0.0545407	0.405476	0.344711	0.495721	0.82869
C9JRZ8	0.443819	0.324304	-0.173059	-0.370653	0.170644	-0.048375	-0.636976	-0.129229	-0.129724	0.0107717	-0.279287	0.189267	0.273298	-0.0828598	-0.231013	-0.467161	-0.89144	-0.309796	0.0293254	-0.604465	-0.0730405	-0.463822	-0.0974593	-0.0447346	0.146175	-0.654901	0.349583
P17931	-0.285872	-0.497798	-0.187102	-0.2742	-0.593089	-0.320244	-0.593372	-0.608382	-0.607632	-0.646014	-0.725859	-0.461525	-0.307203	-0.381004	-0.42296	-0.722858	-0.824333	-0.529728	-0.214772	-0.246059	-0.358042	-0.291057	-0.294471	-1.046	-0.50804	-0.653608	-0.506933
P08133	-0.48037	-0.422264	-0.38727	-0.858945	-0.676596	-0.315657	-0.75878	-0.652889	-0.531029	-0.384935	-0.745781	-0.636576	-0.270553	-0.26593	-0.239048	0.0588161	-0.679506	-0.444937	-0.420228	-0.386969	-0.514128	-0.517994	-0.490168	-0.512265	-0.0117307	-0.759294	-0.519465
P10599	-0.0447849	-0.26698	-0.250123	-0.0904126	0.00525378	-0.122729	-0.211872	-0.00300658	0.0756107	-0.0655638	0.164636	-0.0622526	0.0917964	0.18041	-0.0473233	-0.0835838	-0.0570235	0.0576688	0.0451493	-0.0503389	0.156377	0.0245549	0.300859	0.16378	0.35193	0.0699585	-0.596679
P12110	0.230479	-0.405645	-0.122919	-0.4852	-1.06428	-0.7957	-0.241081	-0.0691783	-0.355899	-0.487501	-0.250712	0.195368	-0.139909	-0.991472	-0.440908	0.0815405	-0.42926	0.064955	-0.596196	-0.197083	-0.0920821	-0.204037	-0.0593218	-0.131851	-0.555037	-0.40005	0.356631
P07711	0.327283	0.375241	0.440367	0.158423	0.0940256	0.361914	0.117583	0.146497	0.0950089	0.391902	0.168312	0.275509	0.147576	-0.0670277	0.239476	0.0867389	-0.0393728	-0.381297	0.618306	0.431685	0.186022	0.0367521	0.209493	0.318691	0.236419	0.281167	0.221546
Q13228	-0.118341	0.118056	-0.11623	-0.223152	0.0933059	0.291639	-0.332307	-0.294309	-0.108757	-0.162674	-0.566319	-0.752728	-0.0687749	-0.109141	0.099183	0.012391	-0.17798	-0.0680063	-0.298824	-0.0260443	-0.104524	-0.0241938	-0.0813526	-0.153905	0.0769772	-0.0119583	0.105236
Q06828	0.232925	0.0740097	0.090908	0.192678	-0.292793	0.437172	-0.0738768	0.222416	0.606592	-0.0656503	-0.269353	0.208672	0.275819	0.091587	0.360268	0.0997226	0.201709	-0.137104	0.0391753	0.241709	0.305159	-0.172903	-0.400366	0.0781726	0.204932	-0.0994398	0.119404
Q06323	-0.487908	-0.339538	-0.169323	-0.492291	-0.48148	-0.600632	-0.452119	-0.544356	-0.487881	-0.34171	-0.474771	-0.310653	-0.362822	-0.459684	-0.075272	-0.593739	-0.231605	-0.415752	-0.454117	-0.575453	-0.529871	-0.31488	-0.34784	-0.268516	-0.0334706	-0.472628	-0.067754
Q9H336	-0.424133	-0.267504	-0.333501	-0.0961245	0.0759471	0.0150095	-0.442551	-0.0939417	-0.645732	0.0145891	-0.574966	-0.487338	-0.358557	-0.41805	-0.702332	-0.637238	-0.0175356	-0.320842	-0.287738	-0.184162	-0.654088	-0.105217	-0.539523	-0.432654	-0.713476	0.148212	0.215244
P01591	-0.0741441	-0.520896	0.0978772	-1.14807	-0.480804	-0.591233	0.00368964	-0.758522	-1.09253	-0.61995	-0.296999	-0.344517	-0.234455	-0.164633	-0.557463	-0.926816	-0.605098	-0.677563	-0.217264	-0.0943491	-0.682339	-0.516013	-0.0706112	0.0501037	0.164924	-0.0922012	-0.620925
P01023	-0.301812	-1.49618	0.634335	-0.0886142	-0.370953	-0.29392	0.062929	-0.37351	-1.50617	-0.877561	-0.71102	-0.623705	-1.91942	-0.124785	-0.462019	0.201888	0.304037	0.32501	-0.456447	-1.01667	-0.819004	-0.981174	-0.810364	-0.236748	-0.361375	-0.163114	-1.25436
P48745	0.0281373	-0.438562	-0.0960957	-0.294417	-0.909163	-0.110818	-0.180418	-0.138477	-0.418421	-0.315642	-0.28222	-0.389561	0.383543	0.0715068	-0.593438	-0.551967	-0.0196389	-0.255458	0.218811	-0.630302	-0.121649	0.148394	-0.14089	-0.260914	-0.559706	-0.667343	-0.0830727
P53396	-0.0341265	0.484211	-0.476115	-0.370928	0.00248822	0.0167396	-0.222462	-0.127274	0.0529272	0.0389565	-0.0233619	0.247022	0.163489	-0.234851	0.0198777	-0.205429	-0.200067	1.4097e-08	0.00589852	-0.0824204	-0.00017563	0.104612	0.108106	-0.148444	0.0859926	-0.230538	-0.129596
P54108	0.598825	0.422287	-0.289842	0.337195	0.208512	-0.139644	0.206825	0.14366	-0.287787	0.190258	-0.361984	0.123295	-0.200588	0.209972	0.791396	-0.248797	0.457937	-0.736694	-0.544504	0.288351	-0.464843	-0.410329	-0.0862217	-0.395128	0.358395	-0.0375424	0.684621
[truncated: 269 more rows]

## Sheet: Peptide
Sequence	Leading razor protein	_C10	_C11	_C7	_C8	_C9	C5R	C6R	C15	C12	C13	_SCT006a	_SCT0010a	_SCT009a	_SC002	_SC003a	_SC001a	_SC004a	SCT_11	SCT_12	SCT_13	SCT_14	SCT_15	SCT_16	_SC005a	SCT18R	SCT19R	SCT20R
[truncated: 8,503 more rows]
[truncated: 1 more columns]

## Sheet: Abundant in Control
	C12	C13	C15	C10	C11	C7	C8	C9	C5	C6	SCT006	SCT0010	SCT009	SCT002	SCT003	SCT001	SCT004	SCT0011	SCT0012	SCT0013	SCT0014	SCT0015	SCT0016	SCT005	SCT0018	SCT0019	SCT0020
[truncated: 53 more rows]

[truncated: 1 more sheets: Abundant in COVID-R]
